# Supplementary material for: Identification of Genomic Regions Associated with Phenotypic Variation between Dog Breeds using Selection Mapping
Source: PubMed Central journal article supplement (PMC3192833; doi:10.1371/journal.pgen.1002316), 2011-10-13

### Si - Bgl region 1

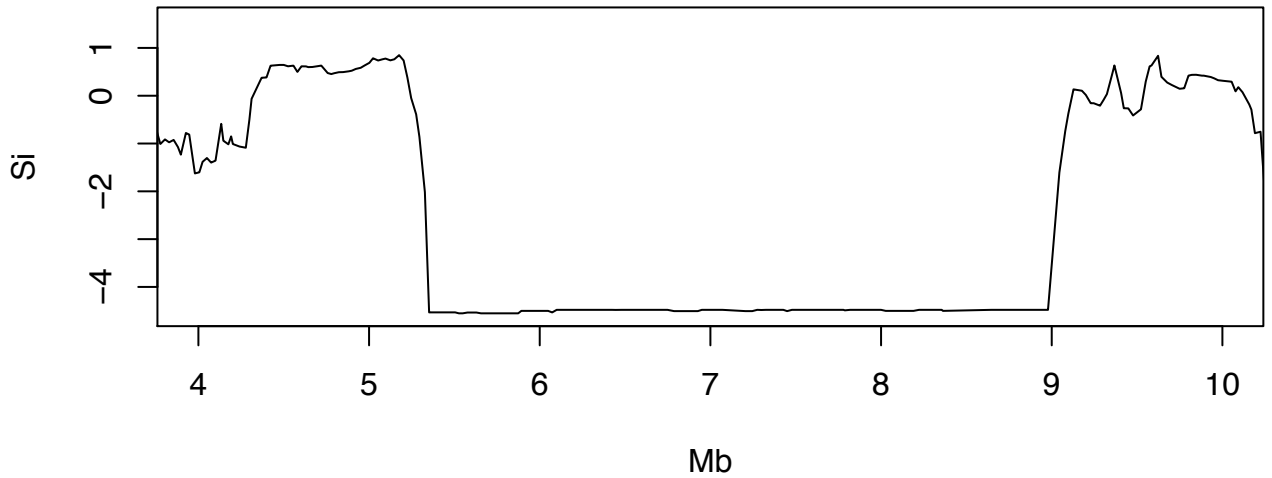

### di - Bgl region 1

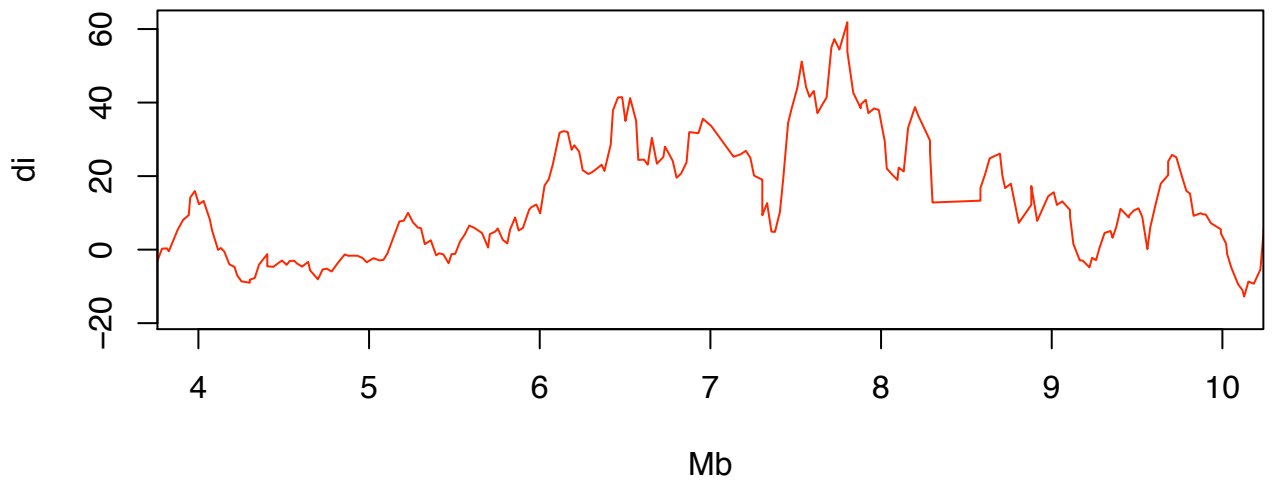

### Si – EBD regions 2 + 12

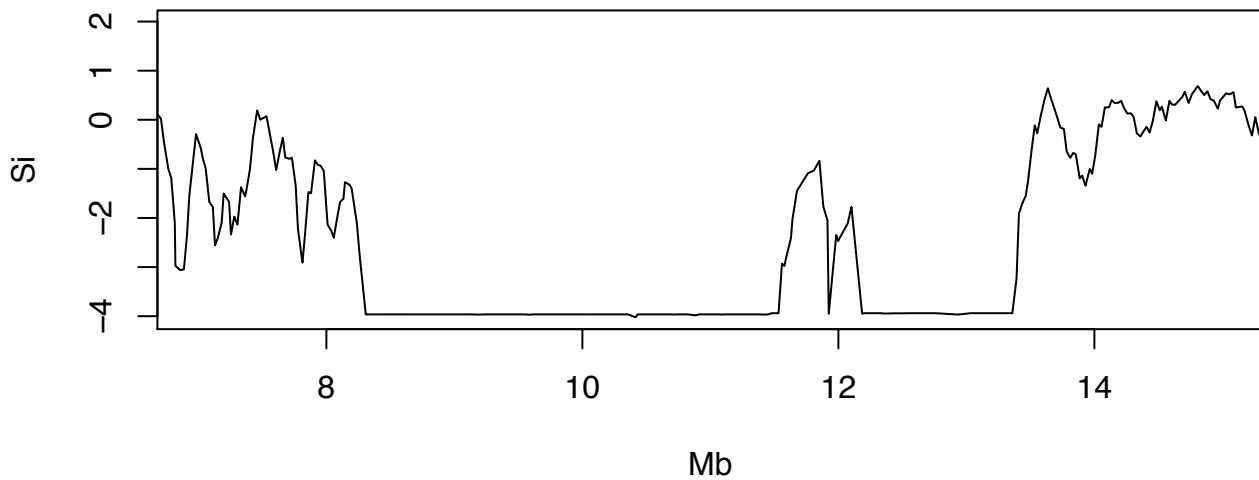

### di – EBD regions 2 + 12

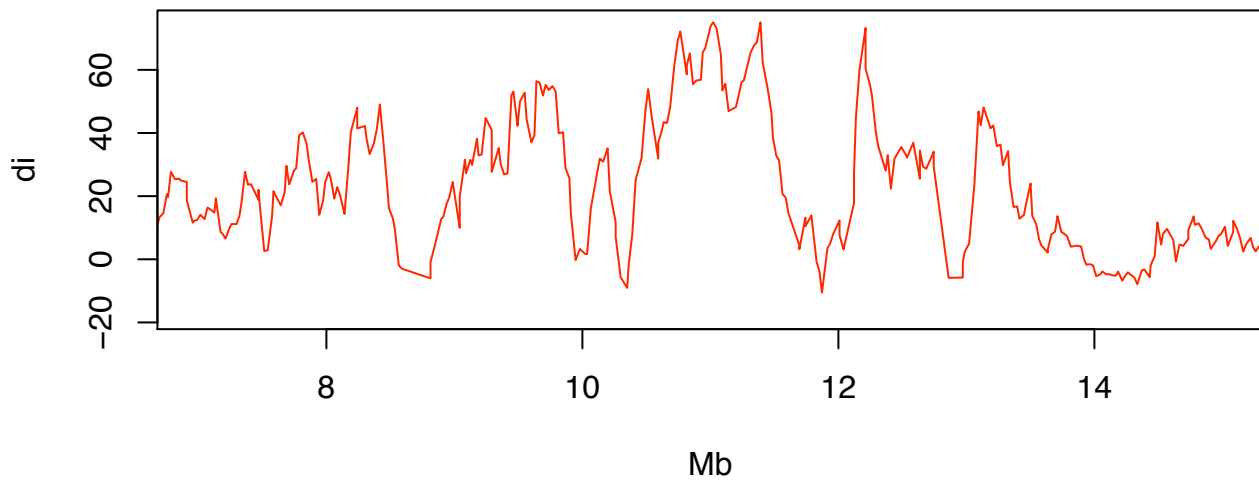

### Si - ESt region 3

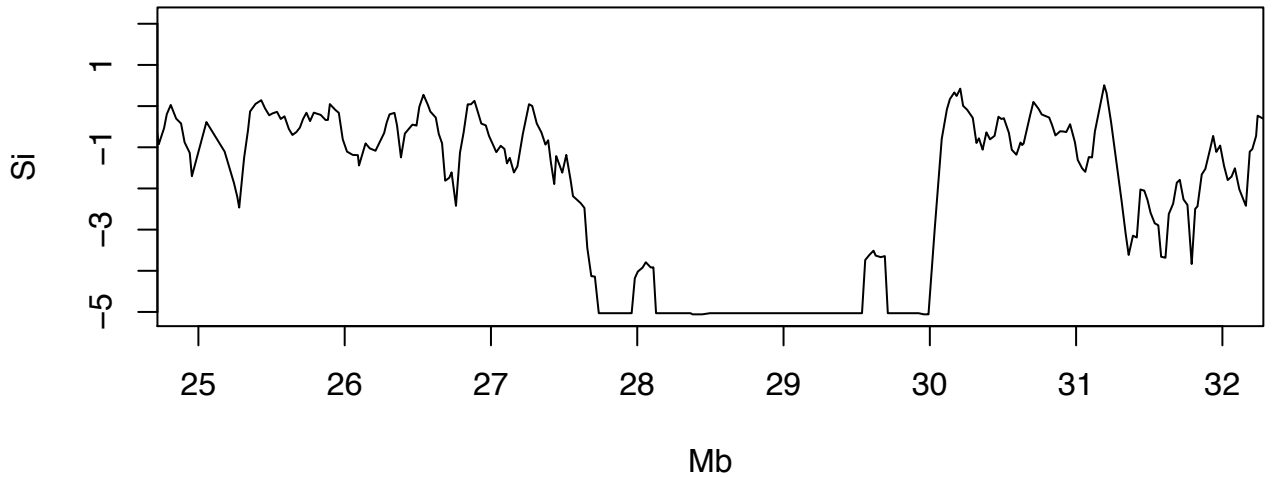

### di - ESt region 3

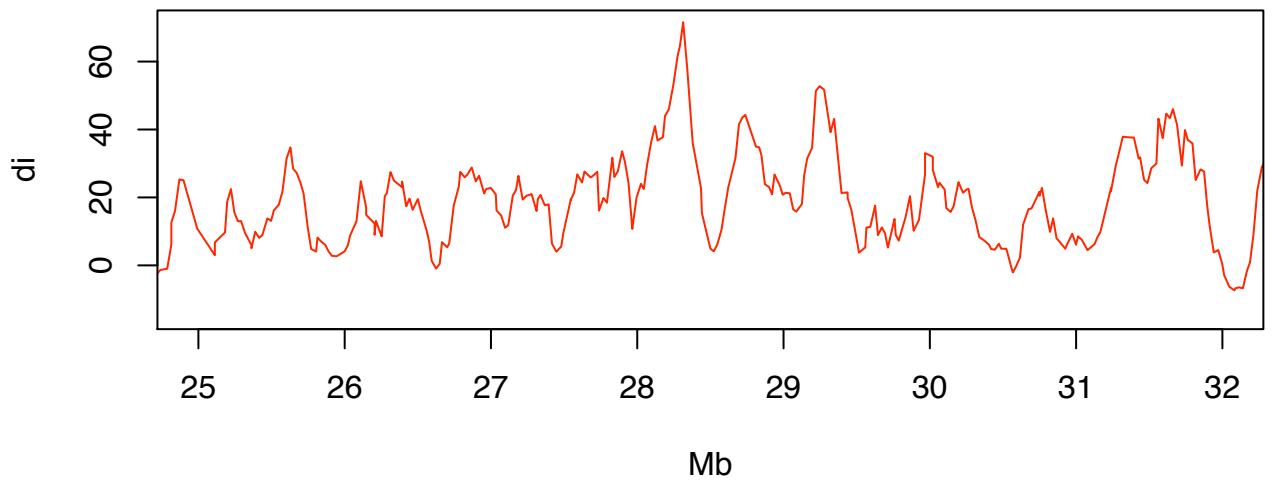

### Si - ShP region 4

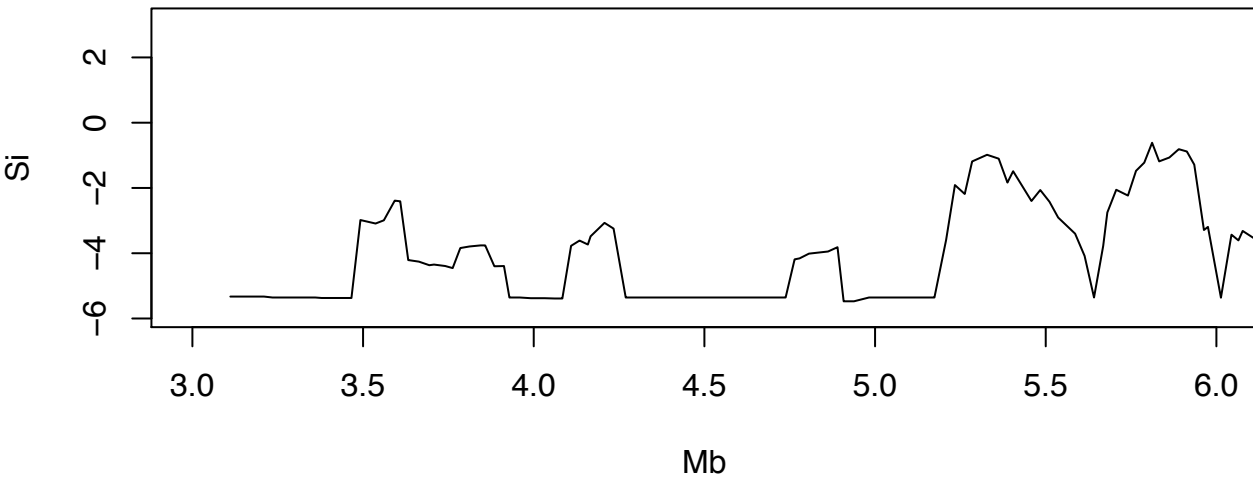

### di - ShP region 4

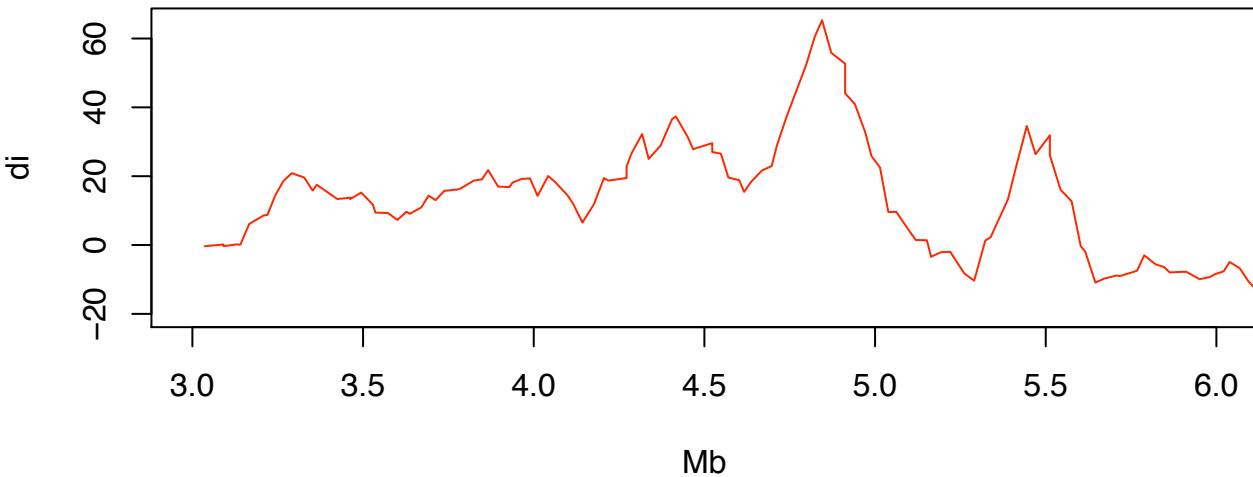

### Si - IrW region 5 + 6

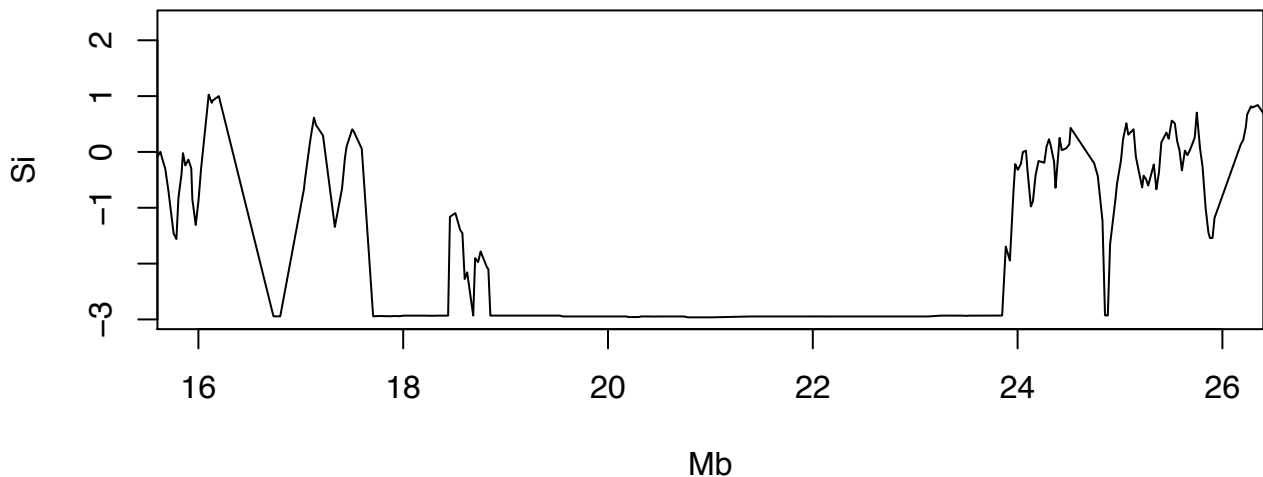

### di - IrW region 5 + 6

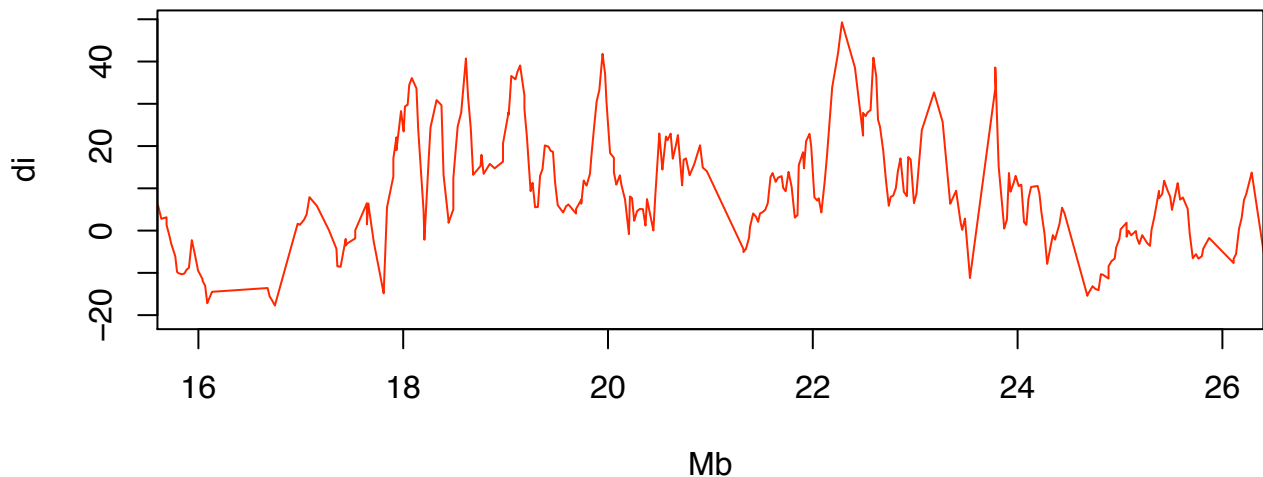

### Si - Bgl region 7

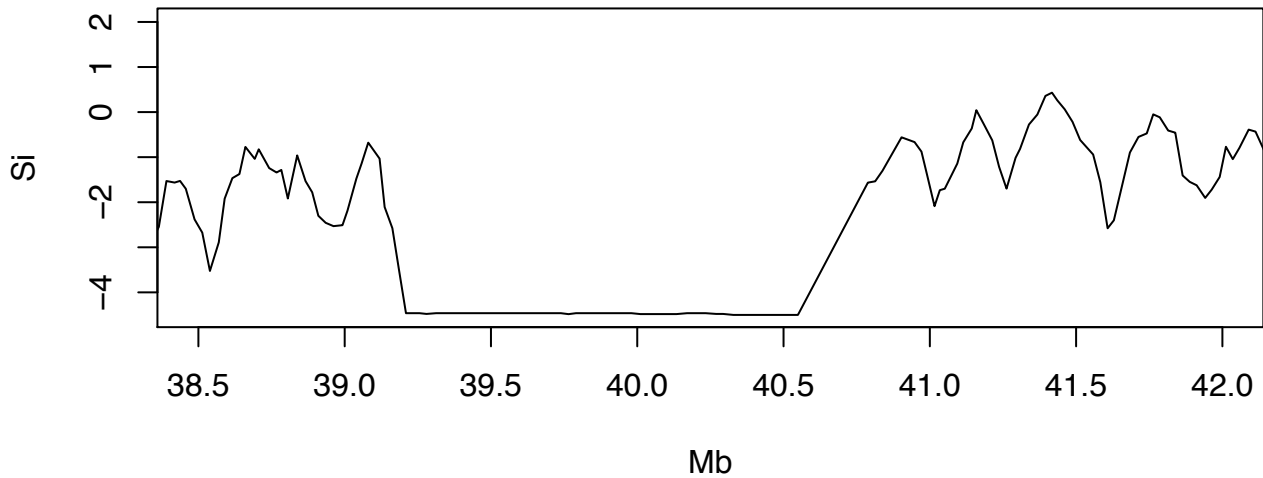

### di - Bgl region 7

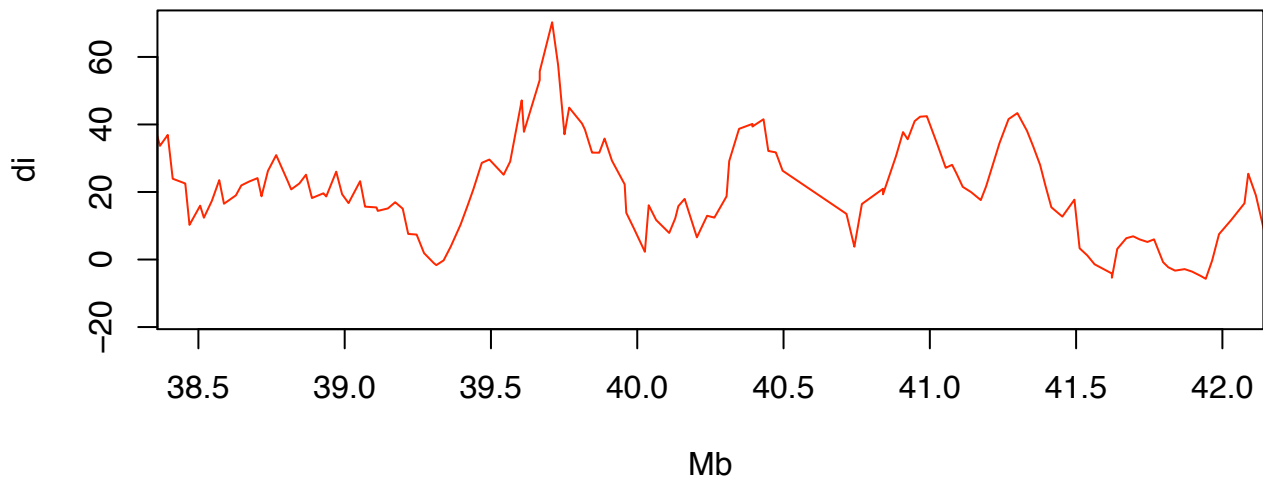

### Si - GRe region 8

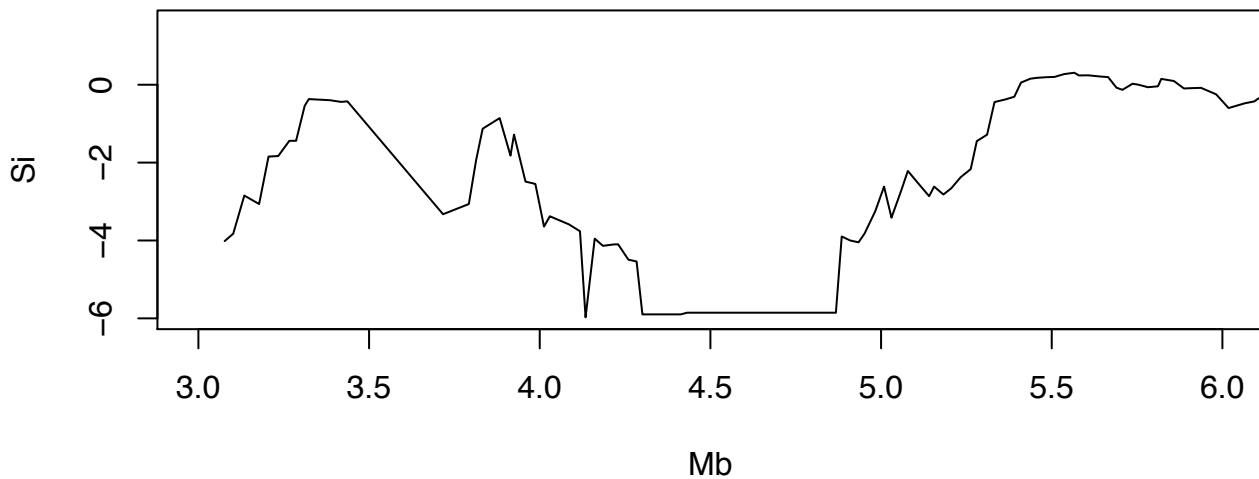

### di - GRe region 8

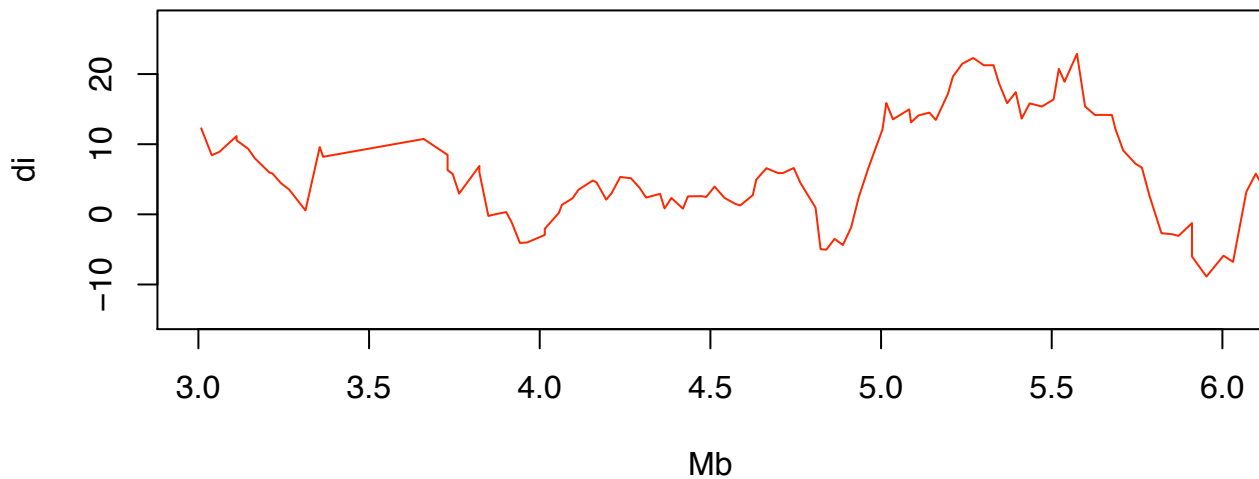

### Si - ShP region 9

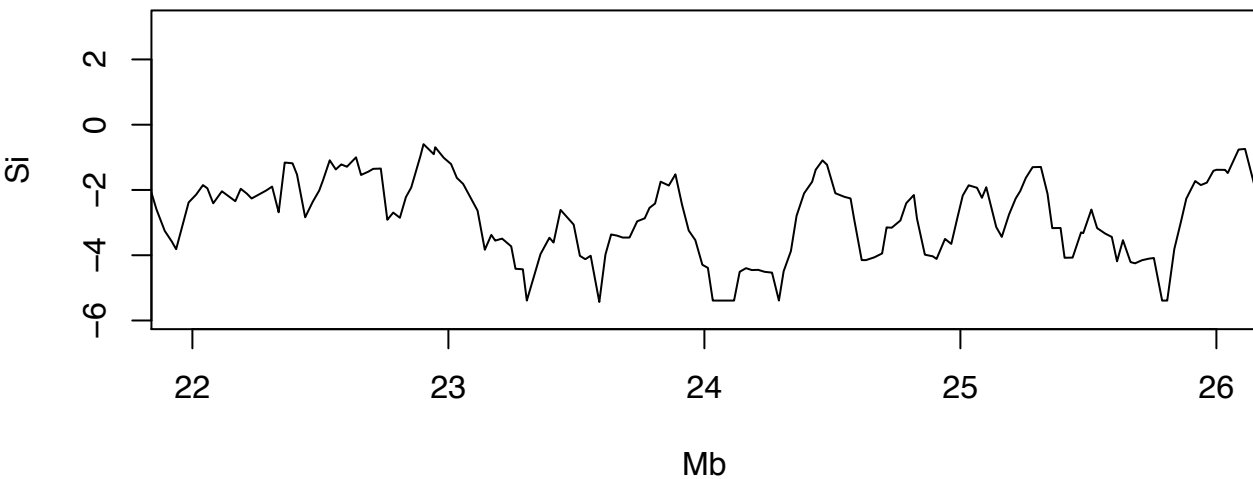

### di - ShP region 9

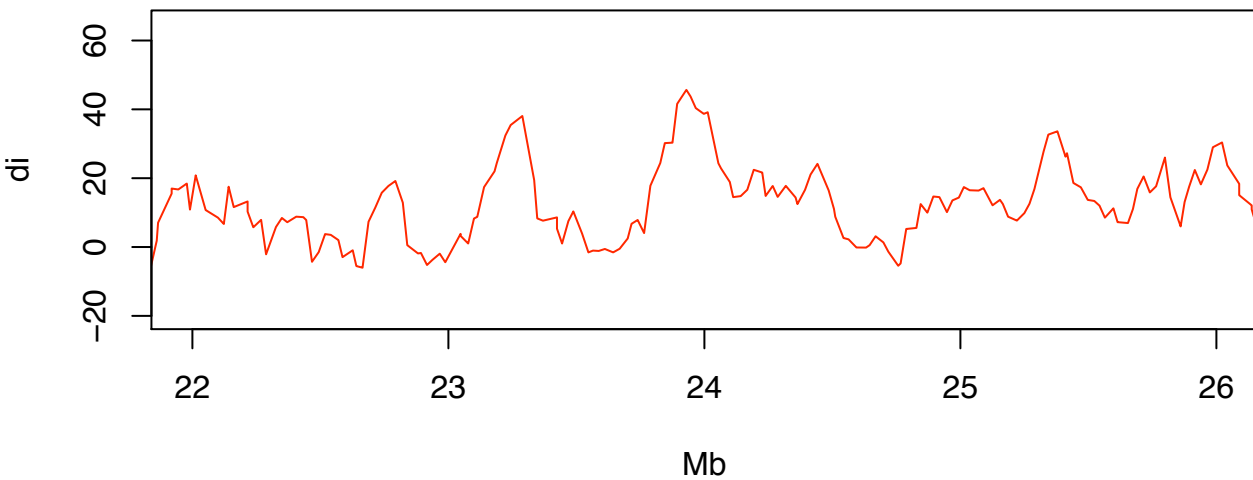



### Si - Gry region 10

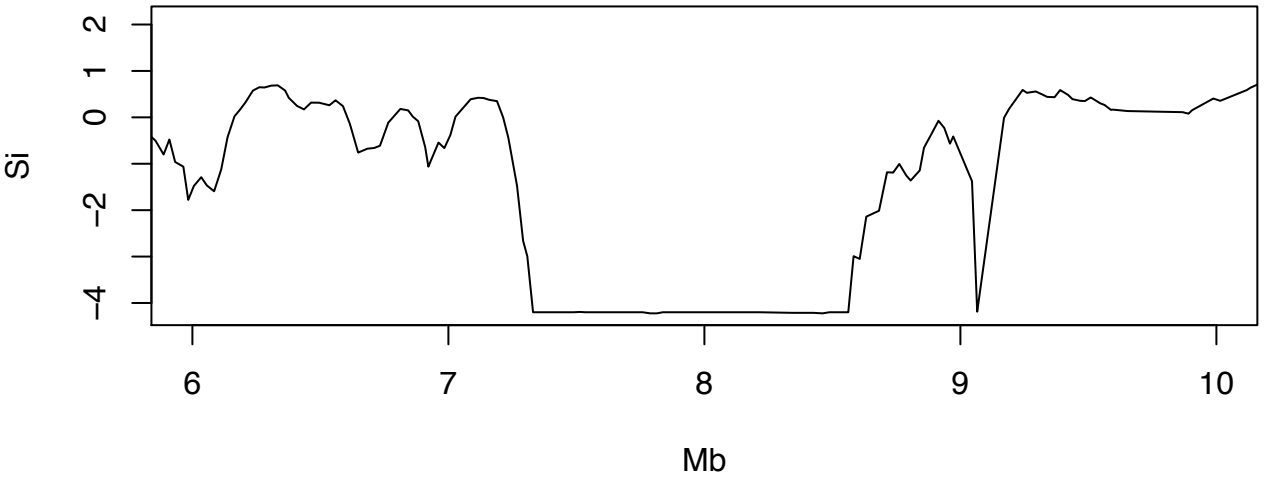

### di - Gry region 10

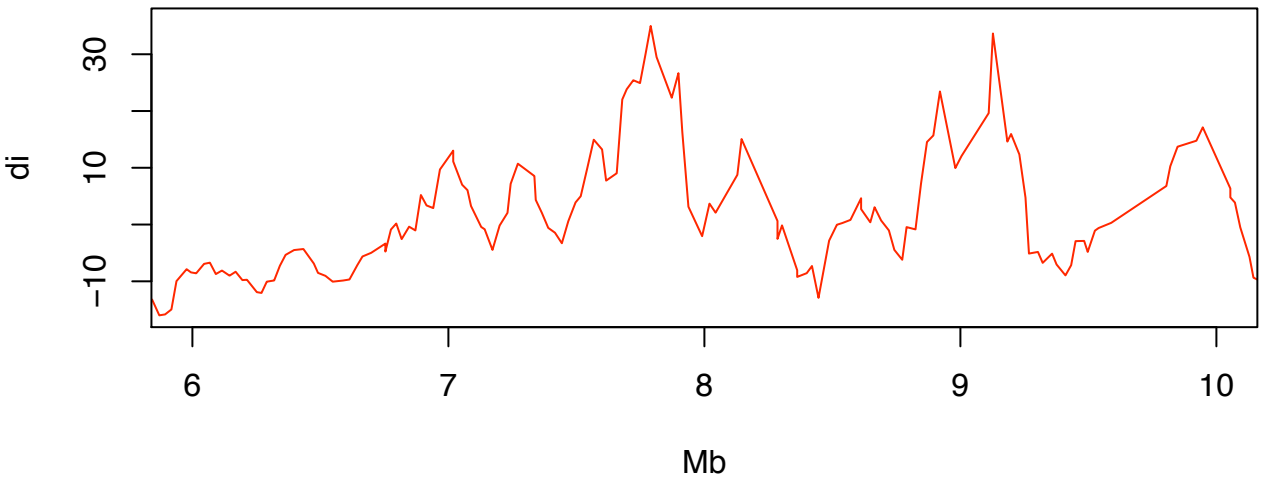

Supplement: pgen.1002316.s008.pdf [file pgen.1002316.s008.pdf]
