# Supplementary material for: Identification of Genomic Regions Associated with Phenotypic Variation between Dog Breeds using Selection Mapping
Source: PubMed Central journal article supplement (PMC3192833; doi:10.1371/journal.pgen.1002316), 2011-10-13

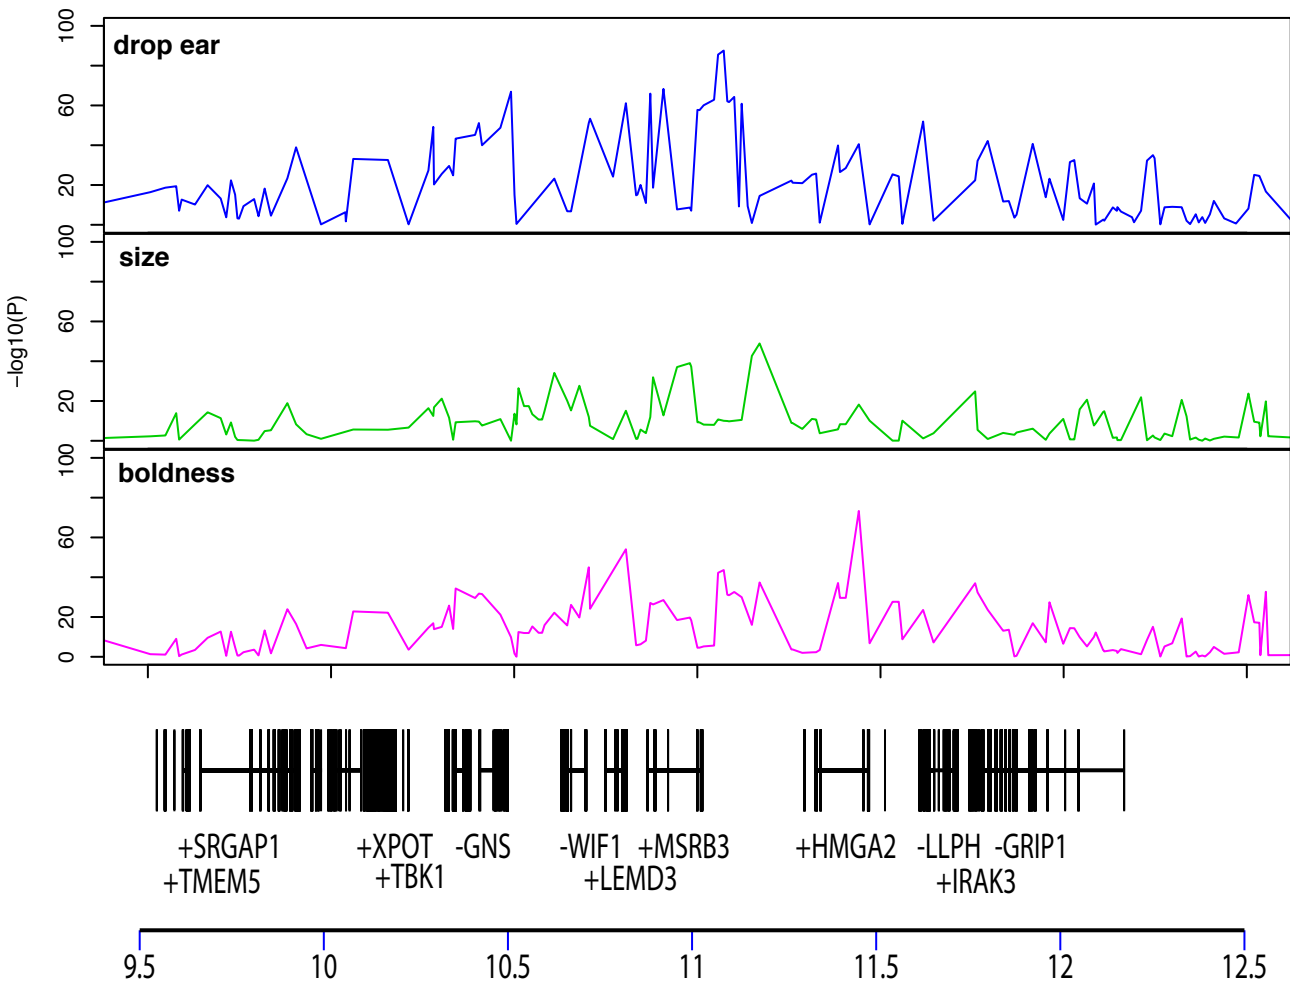

Supplement: pgen.1002316.s005.pdf [file pgen.1002316.s005.pdf]
