# Supplementary material for: Identification of Genomic Regions Associated with Phenotypic Variation between Dog Breeds using Selection Mapping
Source: PLoS Genet. 2011 Oct 13;7(10):e1002316. doi: 10.1371/journal.pgen.1002316 (PMC3192833; doi:10.1371/journal.pgen.1002316)
Supplement: Table S5 — (XLSX) [file pgen.1002316.s013.xlsx]

## Sheet: Si
no.	breed	chr	start	end	length	marginal p-value	5% FDR p-value	no. genes	gene list
1	Bgl	22	5286218	8423791	3137574	0.00255754	0.0392923	27	CAB39L,CDADC1,FNDC3A,CYSLTR2,RCBTB2,Q9N122_CANFA,ITM2B,ENSCAFG00000022103,XM_849424.1,NUDT15,SUCLA2,ENSCAFG00000004456,XM_542567.1,ENSCAFG00000025917,ENSCAFG00000028152,XM_845805.1,5HT2A_CANFA,ESD,LRCH1,C13orf18,LRRC63,LCP1,CPB2,ENSCAFG00000004511,ENSCAFG00000025204,SIAH3,SPERT
2	EBD	26	8813638	11587844	2774207	0.00249377	0.0392923	71	CLIP1,VPS33A,A1DZY5_CANFA,B3GNT4,LRRC43,MLXIP,BCL7A,WDR66,PSMD9,HPD,SETD1B,RHOF,TMEM120B,MORN3,ORAI1,ENSCAFG00000026873,XM_855093.1,ENSCAFG00000023544,ENSCAFG00000023459,RNF34,ANAPC5,CAMKK2,Q64F94_CANFA,B0FLR1_CANFA,IFT81,ENSCAFG00000027198,ENSCAFG00000028087,AT2A2_CANFA,ANAPC7,ENSCAFG00000008456,GPN3,VPS29,RAD9B,ENSCAFG00000020796,PPTC7,TCTN1,HVCN1,NP_001003069.1,PP1G_CANFA,,DNAH10,ENSCAFG000000…
3	ESt	25	27590228	30101489	2511262	0.0025	0.0392923	29	ENSCAFG00000007864,FBXO8,KIAA1712,HPGD,GLRA3,ENSCAFG00000007918,ADAM29,ENSCAFG00000027595,ENSCAFG00000007921,ENSCAFG00000028324,Q30KS3_CANFA,Q30KS1_CANFA,Q30KS0_CANFA,ENSCAFG00000026411,Q30KR9_CANFA,CTSB,FDFT1,NEIL2,GATA4_CANFA,BLK,FAM167A,ENSCAFG00000007979,TDH,MTMR9,ENSCAFG00000025106,ENSCAFG00000028073,XKR6,XM_844766.1,ENSCAFG00000026469
4	ShP	13	3036181	5264386	2228206	0.0027027	0.0392923	24	LAPTM4B,MATN2,XM_843126.1,ENSCAFG00000025847,C8orf47,HRSP12,POP1,NIPAL2,ENSCAFG00000018581,KCNS2,ENSCAFG00000000484,ENSCAFG00000026312,OSR2,VPS13B,ENSCAFG00000025782,cfa-mir-599,cfa-mir-875,ENSCAFG00000024078,XM_532281.2,ENSCAFG00000000532,FBXO43,SPAG1,RNF19A,ENSCAFG00000026124
5	IrW	2	21323001	23188692	1865692	0.00245098	0.0392923	18	NSUN6,CACNB2,ENSCAFG00000023417,SLC39A12,XM_544242.2,ENSCAFG00000004508,STAM,ENSCAFG00000028223,PTPLA_CANFA,A2VBC3_CANFA,ENSCAFG00000027355,A3RLY4_CANFA,TRDMT1,CUBN_CANFA,RSU1,XP_852456.1,C1QL3,PTER
6	IrW	2	19483009	21068544	1585536	0.00245098	0.0392923	10	MTPAP,MAP3K8,XM_544211.2,BAMBI,ENSCAFG00000003936,XM_855284.1,ENSCAFG00000028304,XM_855249.1,MPP7,ENSCAFG00000003866
7	Bgl	14	39147833	40601429	1453597	0.00255754	0.0392923	22	IL6_CANFA,TOMM7,ENSCAFG00000002737,ENSCAFG00000026620,ENSCAFG00000002739,FAM126A,ENSCAFG00000021723,ENSCAFG00000026155,MYEOV2,KLHL7,NUPL2,GPNMB,C7orf30,IGF2BP3,ENSCAFG00000021802,ENSCAFG00000027055,ENSCAFG00000027136,TRA2A,ENSCAFG00000011676,ENSCAFG00000023681,C7orf46,STK31
8	GRe	30	3901787	5329451	1427665	0.0026178	0.0392923	12	C15orf29,C15orf24,ENSCAFG00000027544,CHRM5,AVEN,RYR3,ENSCAFG00000024238,TMCO5B,ENSCAFG00000008199,GREM1,SCG5,ENSCAFG00000008236
9	ShP	13	23047599	24433840	1386242	0.0027027	0.0392923	6	HAS2,ENSCAFG00000027781,ENSCAFG00000027043,ENSCAFG00000022374,ENSCAFG00000026042,ZHX2
10	Gry	25	7271327	8636861	1365535	0.00247525	0.0392923	10	SPG20,ENSCAFG00000006206,ENSCAFG00000027990,ENSCAFG00000024986,XM_534496.2,ENSCAFG00000006251,NBEA,MAB21L1,ENSCAFG00000024448,XM_844249.1
11	GoS	22	4904331	6215828	1311498	0.00244499	0.0392923	14	KPNA3,XM_534113.2,XM_534114.2,RCBTB1,ENSCAFG00000025781,PHF11,SETDB2,CAB39L,CDADC1,FNDC3A,CYSLTR2,RCBTB2,Q9N122_CANFA,ITM2B
12	EBD	26	12121983	13432228	1310246	0.00249377	0.0392923	24	ATXN2,BRAP,ACAD10,XM_848521.1,LOC611711,ENSCAFG00000026405,MAPKAPK5,ENSCAFG00000026327,ENSCAFG00000015330,XM_534679.2,TMEM116,ENSCAFG00000020848,ERP29,NAA25,ENSCAFG00000008828,TRAFD1,C12orf51,ENSCAFG00000008872,Q9XSV0_CANFA,PTPN11,ENSCAFG00000027049,RPH3A,OAS1,Q2KKD1_CANFA
13	Rtw	22	4654448	5937680	1283233	0.00244499	0.0392923	18	ENSCAFG00000027090,C13orf1,ENSCAFG00000020963,cfa-mir-15a,cfa-mir-16-1,KCNRG,TRIM13,KPNA3,XM_534113.2,XM_534114.2,RCBTB1,ENSCAFG00000025781,PHF11,SETDB2,CAB39L,CDADC1,FNDC3A,CYSLTR2
14	Gry	19	4473961	5756046	1282086	0.00247525	0.0392923	10	ENSCAFG00000003628,ZNF330,TBC1D9,ENSCAFG00000028185,UCP1_CANFA,ENSCAFG00000027051,ELMOD2,CLGN,SCOC,ENSCAFG00000025014
15	BMD	2	75308805	76571807	1263003	0.00241546	0.0392923	35	SMPDL3B,RPA2,C1orf38,PPP1R8,ENSCAFG00000027605,STX12,FAM76A,IFI6,FGR,ENSCAFG00000012095,WASF2,XM_544470.1,CD164L2,MAP3K6,SYTL1,TMEM222,WDTC1,Q9GK59_CANFA,FAM46B,C1orf172,NUDC,NR0B2,GPATCH3,GPN2,SFN,ZDHHC18,PIGV,ARID1A,RPS6KA1,ENSCAFG00000021353,HMGN2_CANFA,DHDDS,LIN28,ZNF683,AIM1L
16	Bgl	12	37413405	38655096	1241692	0.00255754	0.0392923	13	RIMS1,ENSCAFG00000023047,ENSCAFG00000027776,KCNQ5,ENSCAFG00000002647,C6orf221,OOEP_CANFA,ENSCAFG00000020933,DDX43,C6orf150,MTO1,Q866G8_CANFA,SLC17A5
17	NFd	22	4752012	5980115	1228104	0.00251889	0.0392923	17	C13orf1,cfa-mir-15a,cfa-mir-16-1,KCNRG,TRIM13,KPNA3,XM_534113.2,XM_534114.2,RCBTB1,ENSCAFG00000025781,PHF11,SETDB2,CAB39L,CDADC1,FNDC3A,CYSLTR2,RCBTB2
18	Rtw	13	50613526	51755732	1142207	0.00244499	0.0392923	16	TMEM165,CLOCK,PDCL2,XM_847876.1,EXOC1,XM_849047.1,ENSCAFG00000002189,ENSCAFG00000002200,ENSCAFG00000027026,KIAA1211,AASDH,PPAT,ENSCAFG00000002228,PAICS,SRP72_CANFA,ARL9
19	Dob	20	39397583	40517365	1119783	0.00242718	0.0392923	34	ENSCAFG00000024589,DCP1A,TKT,KPCD_CANFA,RFT1,ENSCAFG00000023547,SFMBT1,ENSCAFG00000008815,ITIH1,NEK4,ENSCAFG00000026441,SPCS1,GLT8D1,GNL3,ENSCAFG00000026279,ENSCAFG00000027004,ENSCAFG00000027974,ENSCAFG00000026346,PBRM1,ENSCAFG00000027384,C3orf78,NT5DC2,STAB1,NISCH,TNNC1,SEMA3G,PHF7,BAP1,DNAH1,cfa-mir-135a-1,GLYCTK,WDR82,cfa-let-7g,PPM1M
20	GRe	8	5436616	6533588	1096973	0.0026178	0.0392923	42	ENSCAFG00000011090,XM_844591.1,ENSCAFG00000011095,XM_844601.1,ENSCAFG00000025544,TRAC,ENSCAFG00000025461,ENSCAFG00000025403,ENSCAFG00000011096,ENSCAFG00000025361,ENSCAFG00000025359,ENSCAFG00000011119,XM_547719.1,XM_547720.2,ENSCAFG00000025159,ENSCAFG00000011124,ENSCAFG00000011098,ENSCAFG00000025128,DAD1,ABHD4,ENSCAFG00000011156,OXA1L,ENSCAFG00000011223,SLC7A7,MRPL52,O97657_CANFA,ENSCAFG0000002252…
21	Rtw	20	23757409	24841077	1083669	0.00244499	0.0392923	3	FOXP1,ENSCAFG00000027404,ENSCAFG00000028298
22	GoS	22	3050582	4067171	1016590	0.00244499	0.0392923	8	ENSCAFG00000004252,NP_001020438.1,CCDC70,WDFY2,INTS6,FAM124A,GUCY1B2,RNASEH2B
23	BoT	22	4962482	5937680	975199	0.0025641	0.0392923	11	KPNA3,XM_534113.2,XM_534114.2,RCBTB1,ENSCAFG00000025781,PHF11,SETDB2,CAB39L,CDADC1,FNDC3A,CYSLTR2
24	BoT	31	3091611	4052448	960838	0.0025641	0.0392923	7	ENSCAFG00000024833,CGGBP1,XM_535550.2,HTR1F,NP_001006950.1,CHMP2B,ENSCAFG00000025534
25	BoT	20	25834474	26792906	958433	0.0025641	0.0392923	6	FAM19A4,ENSCAFG00000006577,ENSCAFG00000006581,ENSCAFG00000028168,ENSCAFG00000006583,XP_541811.1
26	ShP	6	39549562	40500648	951087	0.0027027	0.0392923	28	Q8SPS5_CANFA,UBN1,GLYR1,ROGDI,SEPT12,ZNF500,C16orf71,ANKS3,NUDT16L1,MGRN1,FAM100A,ENSCAFG00000023563,XM_859149.1,C16orf5,ENSCAFG00000026475,HMOX2,NMRAL1,DNAJA3,ENSCAFG00000025768,CORO7,VASN,NP_001003391.1,GLIS2,TFAP4,SRL,ADCY9,ENSCAFG00000025899,CREBBP
27	CoS	12	37413405	38355125	941721	0.00252525	0.0392923	4	RIMS1,ENSCAFG00000023047,ENSCAFG00000027776,KCNQ5
28	GSl	4	35588004	36518087	930084	0.00257732	0.0392923	10	GHITM,C10orf99,PCDH21,LRIT2,LRIT1,ENSCAFG00000015927,ENSCAFG00000015930,ENSCAFG00000015946,ENSCAFG00000021504,ENSCAFG00000023506
29	Bgl	20	50017501	50891872	874372	0.00255754	0.0392923	37	ILVBL,SYDE1,OR1I1,CASP14,CCDC105,EAA4_CANFA,Q6W6V0_CANFA,XM_541990.1,XM_848013.1,Q6W6W4_CANFA,Q70ZK0_CANFA,Q70ZF5_CANFA,Q6W6R8_CANFA,Q70ZF1_CANFA,XM_541995.1,Q6W6V2_CANFA,Q70ZA7_CANFA,Q70ZF9_CANFA,Q70ZB8_CANFA,ENSCAFG00000016216,OLF4_CANFA,Q70ZL3_CANFA,Q70ZE1_CANFA,Q6W6U9_CANFA,Q6W6U1_CANFA,ENSCAFG00000026208,Q70ZI0_CANFA,Q70ZF0_CANFA,Q70ZI2_CANFA,Q70ZG0_CANFA,Q70ZB5_CANFA,Q70ZJ1_CANFA,Q6W6S9_CAN…
30	Rtw	20	50017501	50891872	874372	0.00244499	0.0392923	37	ILVBL,SYDE1,OR1I1,CASP14,CCDC105,EAA4_CANFA,Q6W6V0_CANFA,XM_541990.1,XM_848013.1,Q6W6W4_CANFA,Q70ZK0_CANFA,Q70ZF5_CANFA,Q6W6R8_CANFA,Q70ZF1_CANFA,XM_541995.1,Q6W6V2_CANFA,Q70ZA7_CANFA,Q70ZF9_CANFA,Q70ZB8_CANFA,ENSCAFG00000016216,OLF4_CANFA,Q70ZL3_CANFA,Q70ZE1_CANFA,Q6W6U9_CANFA,Q6W6U1_CANFA,ENSCAFG00000026208,Q70ZI0_CANFA,Q70ZF0_CANFA,Q70ZI2_CANFA,Q70ZG0_CANFA,Q70ZB5_CANFA,Q70ZJ1_CANFA,Q6W6S9_CAN…
31	GoS	14	6252246	7121413	869168	0.00244499	0.0392923	4	LRGUK,XM_539369.2,ENSCAFG00000025266,ENSCAFG00000027503
32	Wei	22	5084191	5937680	853490	0.00246305	0.0392923	9	XM_534114.2,RCBTB1,ENSCAFG00000025781,PHF11,SETDB2,CAB39L,CDADC1,FNDC3A,CYSLTR2
33	GSh	19	36016103	36862593	846491	0.00248139	0.0392923	4	DPP10,ENSCAFG00000022144,ENSCAFG00000024927,ENSCAFG00000004984
34	BMD	2	76663844	77504039	840196	0.00241546	0.0392923	22	CATSPER4,CNKSR1,ZNF593,GRRP1,PDIK1L,TRIM63,SLC30A2,EXTL1,PAFAH2,STMN1,ENSCAFG00000012747,C1orf135,FAM54B,SEPN1,MAN1C1,LDLRAP1,MACOI_CANFA,Q3BCQ6_CANFA,TMEM50A,C1orf63,ENSCAFG00000012898,ENSCAFG00000012895
35	Gry	5	82980875	83819550	838676	0.00247525	0.0392923	17	XM_848524.1,NFAT5,ENSCAFG00000027882,ENSCAFG00000020262,XM_846121.1,ENSCAFG00000025660,TERF2,TMED6,COG8,VPS4A,SNTB2,CHTF8,CIRH1A,HAS3,TMCO7,Q95LE0_CANFA,ENSCAFG00000024417
36	Gry	18	23443867	24269709	825843	0.00247525	0.0392923	1	SEMA3C
37	EBD	13	19237875	20058553	820679	0.00249377	0.0392923	4	UTP23,RAD21,SLC30A8,MED30
38	StP	13	11415999	12231229	815231	0.0025	0.0392923	4	RSPO2,EIF3E,ENSCAFG00000000705,XM_847922.1
39	Bgl	12	46016930	46831847	814918	0.00255754	0.0392923	7	UBE2CBP,DOPEY1,ENSCAFG00000027413,PGM3,RWDD2A,ME1,ENSCAFG00000002945
40	FSp	13	6200154	7003570	803417	0.00254453	0.0392923	6	GRHL2,NCALD,UBE2NL,XM_539108.2,RRM2B,UBR5
41	BMD	6	54851466	55650356	798891	0.00241546	0.0392923	4	ENSCAFG00000026884,XP_849822.1,DPYD,ENSCAFG00000020070
42	BeT	15	43924220	44700579	776360	0.00243902	0.0392923	7	CCDC53,NUP37,ENSCAFG00000027023,C12orf48,MCH_CANFA,IGF1_CANFA,PAH
43	ShP	13	20738953	21496018	757066	0.0027027	0.0392923	6	SAMD12,ENSCAFG00000021541,TNFRSF11B,ENSCAFG00000000835,COLEC10,MAL2
44	CoS	10	10333372	11081762	748391	0.00252525	0.0392923	7	RASSF3,Q32KH4_CANFA,TBC1D30,WIF1,LEMD3,MSRB3,ENSCAFG00000027222
45	ESt	4	5360127	6095637	735511	0.0025	0.0392923	7	Q8WN72_CANFA,ENSCAFG00000026154,ENSCAFG00000008063,ENSCAFG00000028329,ENSCAFG00000028199,ENSCAFG00000025810,ENSCAFG00000010041
46	Dac	25	4122303	4848097	725795	0.00257069	0.0392923	3	COG6,ENSCAFG00000005998,ENSCAFG00000025601
47	GSh	19	13089775	13802943	713169	0.00248139	0.0392923	1	ENSCAFG00000026425
48	TYo	24	27366935	28068458	701524	0.00248139	0.0392923	23	GDF5,CEP250,ENSCAFG00000020980,XM_542976.2,C20orf173,ERGIC3,ENSCAFG00000008154,SPAG4,RBM12,NFS1,ROMO1,RBM39,ENSCAFG00000028218,ENSCAFG00000027513,ENSCAFG00000020899,PHF20,ENSCAFG00000027958,ENSCAFG00000020822,SCAND1,C20orf152,ENSCAFG00000026646,XM_542979.2,C20orf4
49	Dob	2	63231557	63930224	698668	0.00242718	0.0392923	7	B6F0U1_CANFA,LPCAT2,XM_544399.2,Q9N1P6_CANFA,IRX6,ENSCAFG00000026661,IRX5
50	Eur	21	4775817	5456199	680383	0.0025974	0.0392923	1	ENSCAFG00000022278
51	Rtw	22	3952085	4623549	671465	0.00244499	0.0392923	3	ENSCAFG00000028086,ENSCAFG00000004303,ENSCAFG00000027600
52	Elk	10	7261865	7927964	666100	0.00245098	0.0392923	1
53	JRT	5	4943609	5607836	664228	0.00249377	0.0392923	3	SF3A1,ENSCAFG00000023789,ENSCAFG00000009842
54	TYo	3	40073821	40734830	661010	0.00248139	0.0392923	7	ENSCAFG00000010278,XM_844023.1,ENSCAFG00000026431,OTUD7A,ENSCAFG00000024028,TRPM1,ENSCAFG00000026652
55	LRe	28	27159839	27814512	654674	0.00246914	0.0392923	7	TCF7L2,HABP2,NRAP,CASP7,C10orf81,DCLRE1A,NHLRC2
56	BeT	12	19099339	19751759	652421	0.00243902	0.0392923	2	ENSCAFG00000023834,XM_862561.1
57	ShP	6	33468177	34119279	651103	0.0027027	0.0392923	6	ENSCAFG00000018849,TNFRSF17,GSPT1,XM_536972.2,ZC3H7A,TXNDC11
58	Sci	16	11085282	11730416	645135	0.00248139	0.0392923	9	ENSCAFG00000028175,Q698R1_CANFA,NDUFB2,ADCK2,DENND2A,ENSCAFG00000022071,MKRN1,RAB19,SLC37A3
59	Gry	10	5035631	5679587	643957	0.00247525	0.0392923	1
60	BrS	8	4228264	4868783	640520	0.0025974	0.0392923	10	FBLN5,TRIP11,XM_537352.2,NDUFB1,ENSCAFG00000027166,CPSF2,SLC24A4,RIN3,ENSCAFG00000009502,LGMN
61	TYo	10	10832919	11470246	637328	0.00248139	0.0392923	3	MSRB3,ENSCAFG00000027222,ENSCAFG00000022943
62	ShP	13	25289212	25924408	635197	0.0027027	0.0392923	8	FER1L6,ENSCAFG00000008774,TMEM65,TRMT12,RNF139,TATDN1,NDUFB9,MTSS1
63	GRe	7	3659746	4293073	633328	0.0026178	0.0392923	15	PPP1R12B,UBE2T,LGR6,ENSCAFG00000010570,PTPN7,GPR37L1,ENSCAFG00000010507,ELF3,RNPEP,TIMM17A,ENSCAFG00000025451,ENSCAFG00000010633,IPO9,ENSCAFG00000010671,NAV1
64	CoS	3	77777415	78410733	633319	0.00252525	0.0392923	2	ENSCAFG00000027087,DTHD1
65	BeT	20	36875155	37504401	629247	0.00243902	0.0392923	2	ERC2,ENSCAFG00000027633
66	Wei	1	83638065	84259251	621187	0.00246305	0.0392923	2	GNAQ,GNA14
67	BeT	4	20802223	21422790	620568	0.00243902	0.0392923	1	ENSCAFG00000013264
68	JRT	7	5879319	6493333	614015	0.00249377	0.0392923	1	NR5A2
69	Dac	18	18158580	18769604	611025	0.00257069	0.0392923	4	SRPK2,ENSCAFG00000026537,MLL5,ENSCAFG00000025400
70	Rtw	19	16024953	16634874	609922	0.00244499	0.0392923	6	MFSD8,PLK4,HSPA4L,SLC25A31,INTU,ENSCAFG00000005164
71	GoS	3	17979085	18587977	608893	0.00244499	0.0392923	3	FAM172A,ENSCAFG00000028290,NR2F1
72	GSl	5	44542628	45151323	608696	0.00257732	0.0392923	13	TOM1L2,ENSCAFG00000024581,Q7YSA0_CANFA,cfa-mir-33b,RAI1,PEMT,ENSCAFG00000026606,ENSCAFG00000018534,RASD1,MED9,NT5M,ENSCAFG00000001949,COPS3
73	NSD	21	36081149	36686887	605739	0.00255754	0.0392923	9	SWAP70,ENSCAFG00000007500,XM_534052.2,XM_849146.1,ENSCAFG00000007529,XM_849153.1,ENSCAFG00000007532,ENSCAFG00000024485,ADML_CANFA
74	BoT	13	11017292	11616021	598730	0.0025641	0.0392923	2	ANGP1_CANFA,ENSCAFG00000021358
75	BeT	14	10937672	11534993	597322	0.00243902	0.0392923	7	IMPDH1,PRRT4,RBM28,LEP_CANFA,cfa-mir-129-1,SND1,LRRC4
76	GSh	19	4867258	5463342	596085	0.00248139	0.0392923	7	TBC1D9,ENSCAFG00000028185,UCP1_CANFA,ENSCAFG00000027051,ELMOD2,CLGN,SCOC
77	Dac	3	44445705	45038064	592360	0.00257069	0.0392923	5	TTC23,SYNM,Q6QHH2_CANFA,PGPEP1L,FAM169B
78	GRe	25	6091591	6682283	590693	0.0026178	0.0392923	4	TRPC4,POSTN,FAM48A,EXOSC8
79	Elk	8	3638460	4228264	589805	0.00245098	0.0392923	10	ENSCAFG00000010792,Q70Z86_CANFA,ENSCAFG00000010800,OR4L1,ENSCAFG00000010818,ENSCAFG00000027731,ENSCAFG00000025811,CATSPERB,TC2N,FBLN5
80	Dac	18	22910433	23500157	589725	0.00257069	0.0392923	4	GNAI1,GNAT3,CD36,SEMA3C
81	CoS	31	4641264	5229205	587942	0.00252525	0.0392923	4	ENSCAFG00000022199,CADM2,ENSCAFG00000027182,ENSCAFG00000026645
82	GoS	15	23018179	23603720	585542	0.00244499	0.0392923	1	ENSCAFG00000005722
83	FSp	37	3428346	4013783	585438	0.00254453	0.0392923	11	XM_536000.2,ANKAR,OSGEPL1,PMS1,ORMDL1,ENSCAFG00000024655,GDF8_CANFA,C2orf88,HIBCH,INPP1,ENSCAFG00000025501
84	Rtw	19	5077005	5662194	585190	0.00244499	0.0392923	8	TBC1D9,ENSCAFG00000028185,UCP1_CANFA,ENSCAFG00000027051,ELMOD2,CLGN,SCOC,ENSCAFG00000025014
85	BMD	3	61335961	61919106	583146	0.00241546	0.0392923	6	PPP2R2C,MRFAP1,S100P,CNO,KIAA0232,TBC1D14
86	EBD	20	5367665	5942535	574871	0.00249377	0.0392923	10	EEFSEC,DNAJB8,GATA2,ENSCAFG00000004144,RPN1,RAB7A_CANFA,H1FX,C3orf37,COPG,CNBP
87	EBD	15	47953327	48527447	574121	0.00249377	0.0392923	4	SLC10A7,POU4F2,TTC29,ENSCAFG00000027204
88	EBD	1	7412593	7981067	568475	0.00249377	0.0392923	6	ZNF407,ENSCAFG00000026962,CNDP1,CNDP2,FAM69C,C18orf55
89	IrW	10	5111375	5679587	568213	0.00245098	0.0392923	1
90	EBD	16	20231448	20795879	564432	0.00249377	0.0392923	1	XM_848977.1
91	BoT	37	3428346	3992189	563844	0.0025641	0.0392923	10	XM_536000.2,ANKAR,OSGEPL1,PMS1,ORMDL1,ENSCAFG00000024655,GDF8_CANFA,C2orf88,HIBCH,INPP1
92	ESt	6	17776232	18339882	563651	0.0025	0.0392923	8	ENSCAFG00000016408,EIF3B,SNX8,NUDT1,FTSJ2,ENSCAFG00000024470,MAD1L1,XM_547014.1
93	Elk	24	26355154	26914335	559182	0.00245098	0.0392923	14	Q2LIQ4_CANFA,ENSCAFG00000024610,AHCY,XM_847433.1,ENSCAFG00000027271,ITCH,ENSCAFG00000021539,DYNLRB1,MAP1LC3A,PIGU,TP53INP2,NCOA6,GGT7,ACSS2
94	Sci	8	50803680	51360616	556937	0.00248139	0.0392923	14	KIAA0317,LOC612615,YLPM1,PROX2,DLST,RPS6KL1,PGF,EIF2B2,MLH3,ACYP1,FAM164C,NEK9,TMED10,XM_547913.2
95	Sci	9	14324095	14874739	550645	0.00248139	0.0392923	12	ENSCAFG00000013074,TANC2,CYB561,Q3HTU3_CANFA,KCNH6,DCAF7,TACO1,MAP3K3,LIMD2,STRADA,CCDC47,DDX42
96	GRe	8	4687893	5238110	550218	0.0026178	0.0392923	8	RIN3,ENSCAFG00000009502,LGMN,GOLGA5,CHGA,ITPK1,ENSCAFG00000027952,XM_548497.2
97	Elk	12	58608990	59157352	548363	0.00245098	0.0392923	2	C6orf167,ENSCAFG00000022961
98	ShP	13	24511197	25059538	548342	0.0027027	0.0392923	10	WDR67,FAM83A,C8orf76,XM_532322.2,ATAD2,WDYHV1,FBXO32,ENSCAFG00000001011,KLHL38,ANX13_CANFA
99	GRe	17	3128919	3672468	543550	0.0026178	0.0392923	4	SH3YL1,ENSCAFG00000003206,TMEM18,SNTG2
100	GSl	24	9991165	10534565	543401	0.00257732	0.0392923	1
101	CoS	12	36366886	36909311	542426	0.00252525	0.0392923	6	B3GA2_CANFA,ENSCAFG00000002619,OGFRL1,cfa-mir-30c-2,ENSCAFG00000026626,cfa-mir-30a
102	IrW	1	7363292	7902774	539483	0.00245098	0.0392923	3	ZNF407,ENSCAFG00000026962,CNDP1
103	ESt	25	23326725	23863002	536278	0.0025	0.0392923	7	NEK1,ENSCAFG00000028260,NP_001020790.1,C4orf27,ENSCAFG00000021456,AADAT,MFAP3L
104	GSh	23	6861445	7396701	535257	0.00248139	0.0392923	5	TRIM71,CNOT10,ENSCAFG00000027748,ENSCAFG00000027015,XM_534215.2
105	TYo	3	4309405	4843316	533912	0.00248139	0.0392923	4	WDR36,SLC25A46,TMEM232,ENSCAFG00000023679
106	ShP	6	43803989	44337390	533402	0.0027027	0.0392923	10	CHIA,DENND2D,CEPT1,DRAM2,C1orf103,ENSCAFG00000019771,CD53,Q70Z55_CANFA,XP_854517.1,ENSCAFG00000019775
107	Eur	6	43803989	44337390	533402	0.0025974	0.0392923	10	CHIA,DENND2D,CEPT1,DRAM2,C1orf103,ENSCAFG00000019771,CD53,Q70Z55_CANFA,XP_854517.1,ENSCAFG00000019775
108	ESt	11	5750941	6283243	532303	0.0025	0.0392923	6	XM_538571.1,RPA3,ENSCAFG00000000254,CLK4,ENSCAFG00000028435,ENSCAFG00000025314
109	Dac	12	36085992	36617778	531787	0.00257069	0.0392923	5	C6orf57,ENSCAFG00000002604,ENSCAFG00000002606,A1EAA2_CANFA,B3GA2_CANFA
110	Sci	4	77440764	77972286	531523	0.00248139	0.0392923	1	ENSCAFG00000028113
111	BMD	37	3302664	3830321	527658	0.00241546	0.0392923	8	SLC40A1,XM_536000.2,ANKAR,OSGEPL1,PMS1,ORMDL1,ENSCAFG00000024655,GDF8_CANFA
112	GRe	37	3302664	3830321	527658	0.0026178	0.0392923	8	SLC40A1,XM_536000.2,ANKAR,OSGEPL1,PMS1,ORMDL1,ENSCAFG00000024655,GDF8_CANFA
113	JRT	12	38620518	39147611	527094	0.00249377	0.0392923	2	SLC17A5,CD109
114	ESt	29	35447544	35973136	525593	0.0025	0.0392923	5	WWP1,ENSCAFG00000028180,FAM82B,CPNE3,CNGB3_CANFA
115	BrS	6	3457489	3980304	522816	0.0025974	0.0392923	18	GBAS,ENSCAFG00000023110,PSPH,ENSCAFG00000010149,ENSCAFG00000026163,ENSCAFG00000020849,ENSCAFG00000010156,PHKG1,CHCHD2,XM_843357.1,ENSCAFG00000023571,ENSCAFG00000016564,XM_843392.1,BGLR_CANFA,ENSCAFG00000010200,XM_536832.2,CRCP,TPST1
116	LRe	17	5952540	6475343	522804	0.00246914	0.0392923	1	ENSCAFG00000027282
117	ESt	28	3715875	4237473	521599	0.0025	0.0392923	6	WDFY4,LRRC18,C10orf72,FAM170B,C10orf128,ENSCAFG00000006614
118	GSl	24	5440289	5957832	517544	0.00257732	0.0392923	2	ENSCAFG00000027317,RALGAPA2
119	NSD	11	48979449	49496191	516743	0.00255754	0.0392923	2	ENSCAFG00000001727,ENSCAFG00000025789
120	CoS	8	23958543	24475047	516505	0.00252525	0.0392923	1
121	Wei	15	23018179	23533510	515332	0.00246305	0.0392923	1	ENSCAFG00000005722
122	Gry	19	3893404	4408351	514948	0.00247525	0.0392923	2	ENSCAFG00000003624,Q6SL83_CANFA
123	StP	22	3050582	3565437	514856	0.0025	0.0392923	5	ENSCAFG00000004252,NP_001020438.1,CCDC70,WDFY2,INTS6
124	BrS	22	3050582	3565437	514856	0.0025974	0.0392923	5	ENSCAFG00000004252,NP_001020438.1,CCDC70,WDFY2,INTS6
125	BoT	21	36203138	36712330	509193	0.0025641	0.0392923	8	ENSCAFG00000007500,XM_534052.2,XM_849146.1,ENSCAFG00000007529,XM_849153.1,ENSCAFG00000007532,ENSCAFG00000024485,ADML_CANFA
126	Elk	37	3453815	3960864	507050	0.00245098	0.0392923	8	ANKAR,OSGEPL1,PMS1,ORMDL1,ENSCAFG00000024655,GDF8_CANFA,C2orf88,HIBCH
127	ShP	6	45009038	45514290	505253	0.0027027	0.0392923	17	HBXIP,AHCYL1,CSF1,EPS8L3,GSTM3,Q9TRV2_CANFA,AMPD2,GNAT2,cfa-mir-197,GNAI3,XM_537040.2,AMIGO1,CYB561D1,ATXN7L2,SYPL2,ENSCAFG00000019832,PSMA5
128	Elk	2	64587640	65091541	503902	0.00245098	0.0392923	2	FTO,RPGRIP1L
129	BeT	17	3182387	3686280	503894	0.00243902	0.0392923	4	SH3YL1,ENSCAFG00000003206,TMEM18,SNTG2
130	Wei	6	26787207	27290070	502864	0.00246305	0.0392923	7	XM_536943.2,ENSCAFG00000024044,XM_547099.2,CRYM,ANKS4B,ZP2_CANFA,TMEM159
131	Rtw	19	9374835	9877230	502396	0.00244499	0.0392923	1
132	TYo	3	75363304	75861173	497870	0.00248139	0.0392923	7	PDS5A,UBE2K,C4orf34,ENSCAFG00000024013,LIAS,RPL9,KLB
133	Bgl	5	3722027	4219765	497739	0.00255754	0.0392923	10	B3GAT1,GLB1L2,GLB1L3,XM_844038.1,XM_536523.2,ACAD8,THYN1,VPS26B,NCAPD3,JAM3
134	LRe	1	5816671	6310474	493804	0.00246914	0.0392923	3	MBP,ZNF236,ENSCAFG00000026120
135	GSl	3	36803951	37297566	493616	0.00257732	0.0392923	1	GABRB3
136	GoS	24	26202760	26695056	492297	0.00244499	0.0392923	13	RALY,ENSCAFG00000021644,EIF2S2,Q2LIQ4_CANFA,ENSCAFG00000024610,AHCY,XM_847433.1,ENSCAFG00000027271,ITCH,ENSCAFG00000021539,DYNLRB1,MAP1LC3A,PIGU
137	BeT	7	15311823	15803916	492094	0.00243902	0.0392923	3	PTPN14,Q9GKN4_CANFA,ENSCAFG00000012599
138	Gry	1	7412593	7902774	490182	0.00247525	0.0392923	3	ZNF407,ENSCAFG00000026962,CNDP1
139	StP	17	5860527	6350585	490059	0.0025	0.0392923	1
140	NSD	25	46863898	47353024	489127	0.00255754	0.0392923	10	DIS3L2,ENSCAFG00000021608,Q9N0V1_CANFA,ECEL1,ENSCAFG00000011227,CHRND,CHRNG,EIF4E2,EFHD1,GIGYF2
141	TYo	24	5555441	6044484	489044	0.00248139	0.0392923	3	RALGAPA2,INSM1,C20orf26
142	Gry	10	4215158	4703539	488382	0.00247525	0.0392923	20	NAB2,B1ABU7_CANFA,ENSCAFG00000000178,SHMT2,NDUFA4L2,STAC3,R3HDM2,INHBC,INHBE,GLI1,ARHGAP9,MARS,DDIT3,DCTN2,KIF5A,PIP4K2C,DTX3,ENSCAFG00000000250,SLC26A10,B4GALNT1
143	ShP	13	5896895	6383843	486949	0.0027027	0.0392923	4	ZNF706,XM_539105.2,ENSCAFG00000026304,GRHL2
144	CoS	24	3539893	4026091	486199	0.00252525	0.0392923	6	CD93,TRBM_CANFA,XM_542863.2,ENSCAFG00000026706,ENSCAFG00000005162,FOXA2
145	Wei	X	88401792	88886101	484310	0.00246305	0.0392923	3	ZCCHC16,LHFPL1,AMOT
146	GSl	18	6306153	6786305	480153	0.00257732	0.0392923	2	ENSCAFG00000003454,ENSCAFG00000026887
147	GoS	4	82501566	82980255	478690	0.00244499	0.0392923	1	ENSCAFG00000018980
148	FSp	24	46816133	47294022	477890	0.00254453	0.0392923	3	ZNF831,ENSCAFG00000026512,EDN3_CANFA
149	GRe	23	5554493	6032122	477630	0.0026178	0.0392923	6	ABHD5,ENSCAFG00000011032,ANO10,ENSCAFG00000018259,ENSCAFG00000004484,SNRK
150	CoS	10	11169956	11644756	474801	0.00252525	0.0392923	3	ENSCAFG00000022943,LLPH,TMBIM4
151	BrS	13	5707116	6179541	472426	0.0025974	0.0392923	5	YWHAZ,ENSCAFG00000022575,ZNF706,XM_539105.2,ENSCAFG00000026304
152	GoS	1	100344410	100816355	471946	0.00244499	0.0392923	7	NXNL2,SPIN1,CCRK,ENSCAFG00000002216,ENSCAFG00000002218,ENSCAFG00000002224,PRSS47
153	IrW	22	5466185	5937680	471496	0.00245098	0.0392923	2	FNDC3A,CYSLTR2
154	EBD	22	5466185	5937680	471496	0.00249377	0.0392923	2	FNDC3A,CYSLTR2
155	LRe	17	28383033	28851946	468914	0.00246914	0.0392923	7	MEMO1,DPY30,SPAST,SLC30A6,ENSCAFG00000005757,YIPF4,BIRC6
156	IrW	10	10302292	10769841	467550	0.00245098	0.0392923	5	RASSF3,Q32KH4_CANFA,TBC1D30,WIF1,LEMD3
157	LRe	14	37112791	37580296	467506	0.00246914	0.0392923	3	MACC1,ENSCAFG00000026121,ITGB8
158	EBD	17	3205199	3672468	467270	0.00249377	0.0392923	3	ENSCAFG00000003206,TMEM18,SNTG2
159	Eur	12	38680516	39147611	467096	0.0025974	0.0392923	2	SLC17A5,CD109
160	NSD	5	50240244	50707207	466964	0.00255754	0.0392923	5	ATG4C,DOCK7,ENSCAFG00000026995,ANGPTL3,USP1
161	StP	11	33528677	33994661	465985	0.0025	0.0392923	1	ENSCAFG00000001468
162	Rtw	33	6981674	7446910	465237	0.00244499	0.0392923	3	ENSCAFG00000025758,ENSCAFG00000023663,ENSCAFG00000023662
163	Dac	2	80681334	81145040	463707	0.00257069	0.0392923	7	Q3HTT4_CANFA,ENSCAFG00000014958,EIF4G3,ENSCAFG00000021523,HP1BP3,SH2D5,KIF17
164	GSl	14	15863338	16325137	461800	0.00257732	0.0392923	4	ENSCAFG00000024943,ENSCAFG00000001790,KIAA1324L,DMTF1
165	Bgl	22	8582273	9041230	458958	0.00255754	0.0392923	11	SLC25A30,ENSCAFG00000004533,ENSCAFG00000022040,ENSCAFG00000028157,ENSCAFG00000026451,XM_545520.2,KCTD4,ENSCAFG00000004550,ENSCAFG00000004552,KIAA1704,NUFIP1
166	BrS	24	5585918	6044484	458567	0.0025974	0.0392923	3	RALGAPA2,INSM1,C20orf26
167	TYo	3	46458625	46917064	458440	0.00248139	0.0392923	1	ENSCAFG00000027621
168	BMD	4	5282995	5739844	456850	0.00241546	0.0392923	6	Q6PW79_CANFA,Q8WN72_CANFA,ENSCAFG00000026154,ENSCAFG00000008063,ENSCAFG00000028329,ENSCAFG00000028199
169	GSh	2	64635972	65091541	455570	0.00248139	0.0392923	2	FTO,RPGRIP1L
170	Bgl	12	36454666	36909311	454646	0.00255754	0.0392923	5	ENSCAFG00000002619,OGFRL1,cfa-mir-30c-2,ENSCAFG00000026626,cfa-mir-30a
171	EBD	26	8240854	8694743	453890	0.00249377	0.0392923	2	Q2EFX7_CANFA,FAM101A
172	TYo	11	28410096	28861743	451648	0.00248139	0.0392923	14	KLHL3,ENSCAFG00000001129,ENSCAFG00000022881,HNRNPA0,ENSCAFG00000001135,MYOT,PKD2L2,FAM13B,WNT8A,NME5,ENSCAFG00000001165,BRD8,KIF20A,CDC23
173	EBD	13	51246757	51697454	450698	0.00249377	0.0392923	9	ENSCAFG00000002200,ENSCAFG00000027026,KIAA1211,AASDH,PPAT,ENSCAFG00000002228,PAICS,SRP72_CANFA,ARL9
174	Gry	10	55990432	56439007	448576	0.00247525	0.0392923	1	ENSCAFG00000021307
175	BoT	32	16573463	17021796	448334	0.0025641	0.0392923	1	FAM190A
176	NSD	3	17998098	18446407	448310	0.00255754	0.0392923	2	FAM172A,ENSCAFG00000028290
177	FSp	14	11188482	11634782	446301	0.00254453	0.0392923	2	SND1,LRRC4
178	EBD	4	20403326	20849589	446264	0.00249377	0.0392923	1	XM_844561.1
179	BoT	7	57928508	58374367	445860	0.0025641	0.0392923	1	DTNA
180	IrW	21	36203138	36647661	444524	0.00245098	0.0392923	7	ENSCAFG00000007500,XM_534052.2,XM_849146.1,ENSCAFG00000007529,XM_849153.1,ENSCAFG00000007532,ENSCAFG00000024485
181	GSl	21	4591456	5034632	443177	0.00257732	0.0392923	2	ENSCAFG00000025022,ENSCAFG00000022278
182	Bgl	21	4591456	5034632	443177	0.00255754	0.0392923	2	ENSCAFG00000025022,ENSCAFG00000022278
183	EBD	21	4591456	5034632	443177	0.00249377	0.0392923	2	ENSCAFG00000025022,ENSCAFG00000022278
184	NSD	25	42465910	42908139	442230	0.00255754	0.0392923	5	IRS1,RHBDD1,ENSCAFG00000027485,Q597P9_CANFA,ENSCAFG00000025475
185	BrS	22	22805317	23247425	442109	0.0025974	0.0392923	1
186	BoT	23	5707298	6149302	442005	0.0025641	0.0392923	3	ANO10,ENSCAFG00000004484,SNRK
187	CoS	5	5141847	5583551	441705	0.00252525	0.0392923	3	SF3A1,ENSCAFG00000023789,ENSCAFG00000009842
188	GoS	21	24632330	25072681	440352	0.00244499	0.0392923	8	CAPN5,ENSCAFG00000024921,B3GNT6,ACER3,ENSCAFG00000005198,TSKU,XM_542297.2,LRRC32
189	BoT	6	49796598	50236868	440271	0.0025641	0.0392923	2	RNPC3,ENSCAFG00000024626
190	GRe	24	3289924	3729744	439821	0.0026178	0.0392923	3	NXT1,CD93,TRBM_CANFA
191	NSD	24	3289924	3729744	439821	0.00255754	0.0392923	3	NXT1,CD93,TRBM_CANFA
192	EBD	37	14677603	15117211	439609	0.00249377	0.0392923	8	WDR12,ICA1L,ALS2CR8,XM_545602.2,XM_846559.1,NBEAL1,ENSCAFG00000021512,CYP20A1
193	Sci	23	32962735	33401748	439014	0.00248139	0.0392923	3	ENSCAFG00000022988,TMEM108,BFSP2
194	Gry	3	31328839	31767817	438979	0.00247525	0.0392923	2	AP3B1_CANFA,ENSCAFG00000027363
195	GSh	9	4674228	5112797	438570	0.00248139	0.0392923	5	TBC1D16,CBX4,CBX8,CBX2,ENPP7
196	GRe	23	28216165	28652800	436636	0.0026178	0.0392923	1	TBC1D5
197	Eur	23	28216165	28652800	436636	0.0025974	0.0392923	1	TBC1D5
198	BrS	22	21508261	21944502	436242	0.0025974	0.0392923	2	ENSCAFG00000004941,ENSCAFG00000020868
199	Elk	16	6860535	7295749	435215	0.00245098	0.0392923	1	ENSCAFG00000022418
200	GSh	1	63567677	64002452	434776	0.00248139	0.0392923	5	ENSCAFG00000027630,ENSCAFG00000000955,ENSCAFG00000027875,ENSCAFG00000024129,NM_001002951.1
201	Dob	20	44671609	45105901	434293	0.00242718	0.0392923	14	SETD2,ENSCAFG00000023946,XM_846454.1,NBEAL2,CCDC12,ENSCAFG00000022315,PTH1R_CANFA,MYL3,PRSS42,ENSCAFG00000013645,ENSCAFG00000013657,PRSS50,TMIE,ALS2CL
202	Sci	36	4568264	5001703	433440	0.00248139	0.0392923	1	ENSCAFG00000009188
203	Sci	10	4215158	4647897	432740	0.00248139	0.0392923	15	NAB2,B1ABU7_CANFA,ENSCAFG00000000178,SHMT2,NDUFA4L2,STAC3,R3HDM2,INHBC,INHBE,GLI1,ARHGAP9,MARS,DDIT3,DCTN2,KIF5A
204	BMD	3	59003457	59435837	432381	0.00241546	0.0392923	3	TMC3,STARD5,IL16
205	Elk	29	17916429	18348518	432090	0.00245098	0.0392923	2	ENSCAFG00000027236,ARMC1
206	TYo	24	25942049	26370499	428451	0.00248139	0.0392923	10	ZNF341,ENSCAFG00000022243,CHMP4B,ENSCAFG00000007483,ENSCAFG00000007487,RALY,ENSCAFG00000021644,EIF2S2,Q2LIQ4_CANFA,ENSCAFG00000024610
207	IrW	13	14696748	15123308	426561	0.00245098	0.0392923	1	XM_844893.1
208	Bgl	6	26787207	27212714	425508	0.00255754	0.0392923	3	XM_536943.2,ENSCAFG00000024044,XM_547099.2
209	BrS	6	26787207	27212714	425508	0.0025974	0.0392923	3	XM_536943.2,ENSCAFG00000024044,XM_547099.2
210	StP	21	25438807	25864037	425231	0.0025	0.0392923	4	WNT11,ENSCAFG00000005296,UVRAG,DGAT2
211	JRT	1	101698682	102121711	423030	0.00249377	0.0392923	14	FGD3,XM_848193.1,BICD2,IPPK,XM_533561.2,ECM2,ENSCAFG00000024350,ASPN,OMD,OGN,ENSCAFG00000022245,NOL8,ENSCAFG00000028066,IARS
212	IrW	1	59967124	60389359	422236	0.00245098	0.0392923	11	BET3L,FAM26E,FAM26D,RWDD1,XM_850267.1,RSHL1,ZUFSP,KPNA5,FAM162B,GPRC6A,RFX6
213	BoC	17	29261925	29683254	421330	0.00245098	0.0392923	1	Q2PPL3_CANFA
214	Elk	8	3100576	3521548	420973	0.00245098	0.0392923	9	ZNF496,ENSCAFG00000026096,NLRP3,ENSCAFG00000010702,XM_547699.2,OR2B11,XM_547700.2,ENSCAFG00000022615,OR2C3
215	TYo	3	37324228	37743285	419058	0.00248139	0.0392923	3	ENSCAFG00000010050,ENSCAFG00000010065,ATP10A
216	FSp	15	5691331	6110320	418990	0.00254453	0.0392923	10	ZMPSTE24,TMCO2,RLF,ENSCAFG00000026117,ENSCAFG00000028313,NP_001010944.1,XM_851539.1,MFSD2A,MYCL1,XM_532548.2
217	Gry	19	15314528	15733030	418503	0.00247525	0.0392923	1	PGRMC2
218	IrW	1	27055561	27473960	418400	0.00245098	0.0392923	5	ME2,MRO,ENSCAFG00000020845,MC2R,MC5R
219	FSp	5	36015910	36433846	417937	0.00254453	0.0392923	12	C17orf68,PFAS,RANGRF,SLC25A35,ARHGEF15,ODF4,KRBA2,RPL26,RNF222,NDEL1,MYH10,CCDC42
220	TYo	3	37830447	38247132	416686	0.00248139	0.0392923	1	ATP10A
221	ESt	23	5582872	5998661	415790	0.0025	0.0392923	6	ABHD5,ENSCAFG00000011032,ANO10,ENSCAFG00000018259,ENSCAFG00000004484,SNRK
222	BMD	21	5600181	6015934	415754	0.00241546	0.0392923	1
223	CoS	8	3944106	4359800	415695	0.00252525	0.0392923	7	CATSPERB,TC2N,FBLN5,TRIP11,XM_537352.2,NDUFB1,ENSCAFG00000027166
224	NFd	8	3944106	4359800	415695	0.00251889	0.0392923	7	CATSPERB,TC2N,FBLN5,TRIP11,XM_537352.2,NDUFB1,ENSCAFG00000027166
225	TYo	10	7390289	7805503	415215	0.00248139	0.0392923	1
226	TYo	3	44592607	45007105	414499	0.00248139	0.0392923	2	Q6QHH2_CANFA,PGPEP1L
227	BMD	23	35765203	36179093	413891	0.00241546	0.0392923	5	PCCB,ENSCAFG00000027764,STAG1,ENSCAFG00000007439,ENSCAFG00000022489
228	GSl	1	70248007	70660966	412960	0.00257732	0.0392923	1
229	ESt	6	71372515	71784545	412031	0.0025	0.0392923	4	IFI44,IFI44L,Q45FN0_CANFA,ENSCAFG00000020810
230	BoT	11	57032893	57444886	411994	0.0025641	0.0392923	7	FRMPD1,RG9MTD3,EXOSC3,DCAF10,ENSCAFG00000002395,SHB,ENSCAFG00000028415
231	TYo	3	40873735	41285363	411629	0.00248139	0.0392923	5	MTMR15,XM_844258.1,MCEE,ENSCAFG00000024415,APBA2
232	Rtw	22	52953736	53364860	411125	0.00244499	0.0392923	5	PCCA,ENSCAFG00000026288,ENSCAFG00000027654,ENSCAFG00000023761,ENSCAFG00000005851
233	Wei	6	49796598	50207512	410915	0.00246305	0.0392923	1	RNPC3
234	ESt	20	34701749	35112488	410740	0.0025	0.0392923	5	ENSCAFG00000027208,C3orf67,FAM3D,FAM107A,ACOX2
235	Rtw	12	18118880	18529307	410428	0.00244499	0.0392923	3	GPR110,XM_847321.1,ENSCAFG00000002084
236	Eur	8	24103363	24513727	410365	0.0025974	0.0392923	1
237	LRe	28	31369553	31779462	409910	0.00246914	0.0392923	2	RAB11FIP2,LOC477835
238	Rtw	19	17064891	17474499	409609	0.00244499	0.0392923	1	ENSCAFG00000003946
239	EBD	5	38617168	39025380	408213	0.00249377	0.0392923	3	SHISA6,ENSCAFG00000017769,ENSCAFG00000023310
240	Dob	7	48551191	48958083	406893	0.00242718	0.0392923	1	ENSCAFG00000021711
241	BeT	15	19429218	19835162	405945	0.00243902	0.0392923	12	ST3GAL3,KDM4A,ENSCAFG00000022296,PTPRF,HYI,KIAA0467,ENSCAFG00000005227,C1orf84,MED8,ELOVL1,CDC20,MPL
242	NFd	1	104016369	104421765	405397	0.00251889	0.0392923	10	ZIM2,ENSCAFG00000023268,ENSCAFG00000002441,XM_541384.2,ENSCAFG00000002443,XM_541386.2,XM_541387.1,XM_848761.1,XM_548675.2,ENSCAFG00000002453
243	ShP	21	36281975	36686887	404913	0.0027027	0.0392923	7	XM_534052.2,XM_849146.1,ENSCAFG00000007529,XM_849153.1,ENSCAFG00000007532,ENSCAFG00000024485,ADML_CANFA
244	BrS	37	16853515	17256342	402828	0.0025974	0.0392923	4	PARD3B,ENSCAFG00000022999,ENSCAFG00000012907,ENSCAFG00000012920
245	GoS	6	22782917	23184965	402049	0.00244499	0.0392923	1
246	Bgl	37	3428346	3830321	401976	0.00255754	0.0392923	7	XM_536000.2,ANKAR,OSGEPL1,PMS1,ORMDL1,ENSCAFG00000024655,GDF8_CANFA
247	Dob	37	3428346	3830321	401976	0.00242718	0.0392923	7	XM_536000.2,ANKAR,OSGEPL1,PMS1,ORMDL1,ENSCAFG00000024655,GDF8_CANFA
248	FSp	8	4836630	5238110	401481	0.00254453	0.0392923	6	LGMN,GOLGA5,CHGA,ITPK1,ENSCAFG00000027952,XM_548497.2
249	ESt	25	31271708	31672961	401254	0.0025	0.0392923	3	KIF13B,HMBOX1,ENSCAFG00000027998
250	Wei	21	8146875	8547635	400761	0.00246305	0.0392923	8	MAML2,ENSCAFG00000026616,MTMR2,ENSCAFG00000026871,ENSCAFG00000013802,CEP57,FAM76B,ENSCAFG00000004124
251	EBD	10	10859628	11260040	400413	0.00249377	0.0392923	2	MSRB3,ENSCAFG00000027222
252	BeT	35	3100835	3500198	399364	0.00243902	0.0392923	5	ENSCAFG00000009134,ENSCAFG00000027794,ENSCAFG00000025137,ENSCAFG00000009151,ENSCAFG00000025055
253	Rtw	35	3100835	3500198	399364	0.00244499	0.0392923	5	ENSCAFG00000009134,ENSCAFG00000027794,ENSCAFG00000025137,ENSCAFG00000009151,ENSCAFG00000025055
254	EBD	20	9103606	9502692	399087	0.00249377	0.0392923	3	PPARG_CANFA,ENSCAFG00000004994,TIMP4
255	FSp	26	18476896	18875938	399043	0.00254453	0.0392923	5	CCDC60,ENSCAFG00000027915,PRKAB1,CIT,ENSCAFG00000021884
256	JRT	7	16980019	17378845	398827	0.00249377	0.0392923	5	ACBD6,ENSCAFG00000020686,XPR1,ENSCAFG00000022887,KIAA1614
257	GSl	25	16562636	16961244	398609	0.00257732	0.0392923	3	ENSCAFG00000007007,ENSCAFG00000025825,ENSCAFG00000025477
258	Wei	24	3259539	3657881	398343	0.00246305	0.0392923	4	GZF1,NXT1,CD93,TRBM_CANFA
259	EBD	10	9506695	9904595	397901	0.00249377	0.0392923	4	ENSCAFG00000028219,C16orf61,TMEM5,SRGAP1
260	IrW	10	9506695	9904595	397901	0.00245098	0.0392923	4	ENSCAFG00000028219,C16orf61,TMEM5,SRGAP1
261	Dob	15	30292263	30689509	397247	0.00242718	0.0392923	3	RASSF9,NEUT_CANFA,MGAT4C
262	BeT	4	27619782	28015557	395776	0.00243902	0.0392923	6	VDAC2,VCL,AP3M1,ENSCAFG00000026456,ADK,ENSCAFG00000027937
263	StP	X	101012327	101407710	395384	0.0025	0.0392923	4	ENSCAFG00000018653,CXorf64,ENSCAFG00000022304,ENSCAFG00000015018
264	BMD	15	8114337	8508899	394563	0.00241546	0.0392923	1	GRIK3
265	IrW	X	25350771	25744863	394093	0.00245098	0.0392923	6	NR0B1,ENSCAFG00000013669,CXorf21,TPT1,ENSCAFG00000025993,GK
266	ShP	13	39984936	40378585	393650	0.0027027	0.0392923	15	ENSCAFG00000025506,LY6H,GPIHBP1,ZNF696,RHPN1,MAFA,ZC3H3,GSDMD,EEF1D,TIGD5,PYCRL,TSTA3,ENSCAFG00000023744,MAPK15,FAM83H
267	JRT	13	52212805	52606325	393521	0.00249377	0.0392923	4	ENSCAFG00000002332,ENSCAFG00000027132,ENSCAFG00000002333,ENSCAFG00000002335
268	StP	30	7645057	8038496	393440	0.0025	0.0392923	2	ENSCAFG00000004067,XM_535426.2
269	Sci	24	27003980	27396576	392597	0.00248139	0.0392923	13	MYH7B,TRPC4AP,ENSCAFG00000007920,EDEM2,PROCR,MMP24,ENSCAFG00000025048,EIF6,FAM83C,UQCC,GDF5,CEP250,ENSCAFG00000020980
270	ESt	19	9742425	10134699	392275	0.0025	0.0392923	1
271	GoS	1	96888619	97280389	391771	0.00244499	0.0392923	3	KIAA1432,ERMP1,C9orf79
272	GRe	12	10208815	10599152	390338	0.0026178	0.0392923	5	ENSCAFG00000023191,ENSCAFG00000027765,XM_538898.2,GLO1,
273	BrS	5	6872999	7263243	390245	0.0025974	0.0392923	3	ENSCAFG00000020853,SNX19,ENSCAFG00000023101
274	Rtw	20	24876053	25264897	388845	0.00244499	0.0392923	1	Q864F3_CANFA
275	BeT	15	36418050	36806421	388372	0.00243902	0.0392923	4	XM_539718.2,NUDT4,UBE2N,Q1ZZT6_CANFA
276	Elk	2	80681334	81069612	388279	0.00245098	0.0392923	5	Q3HTT4_CANFA,ENSCAFG00000014958,EIF4G3,ENSCAFG00000021523,HP1BP3
277	GoS	15	9944996	10332958	387963	0.00244499	0.0392923	9	DLGAP3,ENSCAFG00000003603,GJA4,GJB3,GJB4,GJB5,,ZMYM1,ZMYM6
278	GoS	8	10601071	10988817	387747	0.00244499	0.0392923	1
279	StP	13	10745334	11132643	387310	0.0025	0.0392923	4	ENSCAFG00000000683,ENSCAFG00000000684,XM_844664.1,ANGP1_CANFA
280	Bgl	12	36969855	37356426	386572	0.00255754	0.0392923	2	ENSCAFG00000002623,ENSCAFG00000024293
281	CoS	12	36969855	37356426	386572	0.00252525	0.0392923	2	ENSCAFG00000002623,ENSCAFG00000024293
282	IrW	21	35109320	35495755	386436	0.00245098	0.0392923	10	STK33,TRIM66,ENSCAFG00000006936,ENSCAFG00000021721,ENSCAFG00000026033,ST5,C11orf17,C11orf16,ASCL3,TMEM9B
283	ShP	22	17126010	17512341	386332	0.0027027	0.0392923	1
284	LRe	28	28110956	28497090	386135	0.00246914	0.0392923	3	VWA2,AFAP1L2,ABLIM1
285	NFd	1	97222846	97608531	385686	0.00251889	0.0392923	2	ENSCAFG00000002139,ENSCAFG00000002155
286	BrS	11	39607069	39992720	385652	0.0025974	0.0392923	1	ENSCAFG00000024110
287	IrW	23	5646825	6032122	385298	0.00245098	0.0392923	4	ANO10,ENSCAFG00000018259,ENSCAFG00000004484,SNRK
288	GSl	24	11853881	12239016	385136	0.00257732	0.0392923	5	C20orf7,ENSCAFG00000005587,ENSCAFG00000022325,ENSCAFG00000003497,TASP1
289	Bgl	14	37745127	38129912	384786	0.00255754	0.0392923	1
290	EBD	X	105131774	105516440	384667	0.00249377	0.0392923	6	ARHGAP36,ENSCAFG00000022172,OR11A1,IGSF1,ENSCAFG00000023200,ENSCAFG00000023198
291	StP	37	26333304	26717914	384611	0.0025	0.0392923	4	SMARCAL1,XM_843618.1,IGFBP2,IGFBP5
292	BoC	24	11331804	11716403	384600	0.00245098	0.0392923	3	FLRT3,SEL1L2,
293	GoS	8	48288389	48672882	384494	0.00244499	0.0392923	1
294	StP	19	8977932	9361711	383780	0.0025	0.0392923	1
295	EBD	3	18054602	18437521	382920	0.00249377	0.0392923	1	FAM172A
296	BoT	25	31290910	31672961	382052	0.0025641	0.0392923	3	KIF13B,HMBOX1,ENSCAFG00000027998
297	Sci	34	24093801	24475130	381330	0.00248139	0.0392923	3	LPP,ENSCAFG00000013927,TPRG1
298	BeT	22	6163861	6544950	381090	0.00243902	0.0392923	6	ITM2B,ENSCAFG00000022103,XM_849424.1,NUDT15,SUCLA2,ENSCAFG00000004456
299	LRe	17	61233198	61613579	380382	0.00246914	0.0392923	7	BCL9,ENSCAFG00000026026,ACP6,CXA5_CANFA,GJA8,XM_540275.2,XM_533031.2
300	FSp	17	6567263	6947171	379909	0.00254453	0.0392923	1
301	NFd	X	101936620	102316045	379426	0.00251889	0.0392923	1	ENSCAFG00000024116
302	TYo	5	46004305	46383361	379057	0.00248139	0.0392923	5	XM_536672.2,SERBP1,NP_001020570.1,IL23R,ENSCAFG00000028444
303	Elk	10	8810412	9189039	378628	0.00245098	0.0392923	1	PPM1H
304	Wei	1	26845341	27223580	378240	0.00246305	0.0392923	5	MEX3C,Q6JDJ5_CANFA,ELAC1,ME2,MRO
305	Elk	17	64213993	64592127	378135	0.00245098	0.0392923	4	RPTN,FLG,FLG2,CRNN
306	GSl	18	7353538	7730274	376737	0.00257732	0.0392923	1
307	TYo	3	35554593	35930933	376341	0.00248139	0.0392923	1	GABRG3
308	Bgl	9	37519916	37895840	375925	0.00255754	0.0392923	6	PTRH2,TMEM49,cfa-mir-21,TBD_CANFA,RPS6KB1,ENSCAFG00000022662
309	ESt	30	9416072	9791429	375358	0.0025	0.0392923	2	ENSCAFG00000021497,THBS1
310	NFd	30	7663306	8038496	375191	0.00251889	0.0392923	2	ENSCAFG00000004067,XM_535426.2
311	StP	27	46773080	47147855	374776	0.0025	0.0392923	8	ADIPOR2,ENSCAFG00000024950,LRTM2,XM_534930.2,LOC609252,DCP1B,ENSCAFG00000015998,XM_543884.2
312	EBD	12	14312692	14687249	374558	0.00249377	0.0392923	16	PRPH2_CANFA,TBCC,KIAA0240,RPL7L1,CNPY3,GNMT,PEX6,PPP2R5D,MEA1,KLHDC3,CUL7,MRPL2,KLC4,PTK7,SRF,CUL9
313	BoT	25	9110548	9483406	372859	0.0025641	0.0392923	2	ENSCAFG00000006268,RFC3
314	BoT	30	38283637	38656015	372379	0.0025641	0.0392923	3	THSD4,MYO9A,ENSCAFG00000027837
315	StP	11	54079329	54451587	372259	0.0025	0.0392923	17	NUDT2,ENSCAFG00000024776,C9orf24,C9orf25,DNAI1,ENSCAFG00000001931,CNTFR_CANFA,XM_538708.2,DCTN3,ARID3C,SIGMAR1,GALT,IL11RA,NP_001003968.1,NP_001005256.1,Q68AM9_CANFA,ENSCAFG00000015341
316	IrW	10	10859628	11231464	371837	0.00245098	0.0392923	2	MSRB3,ENSCAFG00000027222
317	Elk	30	15452787	15824137	371351	0.00245098	0.0392923	2	ENSCAFG00000027366,ENSCAFG00000028274
318	BoC	17	5952540	6323838	371299	0.00245098	0.0392923	1
319	ESt	21	25438807	25809632	370826	0.0025	0.0392923	3	WNT11,ENSCAFG00000005296,UVRAG
320	Dob	2	66157751	66528487	370737	0.00242718	0.0392923	1
321	JRT	2	6083366	6453614	370249	0.00249377	0.0392923	1	NRP1
322	LRe	10	32204394	32574281	369888	0.00246914	0.0392923	1
323	EBD	4	72602024	72970977	368954	0.00249377	0.0392923	2	DAB2,C9
324	JRT	9	44793043	45161899	368857	0.00249377	0.0392923	4	ENSCAFG00000018592,EVI2B,OMG,XM_848439.1
325	BeT	4	26875512	27244031	368520	0.00243902	0.0392923	11	P4HA1,NUDT13,ECD,XM_847232.1,DNAJC9,TTC18,ANXA7,ENSCAFG00000021204,ZMYND17,PPP3CB,USP54
326	Elk	24	3657881	4026091	368211	0.00245098	0.0392923	4	XM_542863.2,ENSCAFG00000026706,ENSCAFG00000005162,FOXA2
327	ShP	6	36420524	36788668	368145	0.0027027	0.0392923	2	ABAT,C16orf68
328	Bgl	19	3893404	4260982	367579	0.00255754	0.0392923	1	ENSCAFG00000003624
329	BeT	6	47672181	48039192	367012	0.00243902	0.0392923	1
330	Eur	2	9887944	10254906	366963	0.0025974	0.0392923	7	APBB1IP,DCE2_CANFA,,ABI1,ENSCAFG00000004370,PDSS1,ENSCAFG00000022616
331	Bgl	36	3559314	3924800	365487	0.00255754	0.0392923	4	ENSCAFG00000022972,ENSCAFG00000009172,ENSCAFG00000025972,GALNT13
332	Eur	6	41617520	41982712	365193	0.0025974	0.0392923	23	CCNF,ENSCAFG00000019376,ABCA3,ENSCAFG00000026498,RNPS1,DCI,E4F1,PGP,cfa-mir-1842,C16orf79,MLST8,CASKIN1,TRAF7,ENSCAFG00000026064,RAB26,Q8MJF3_CANFA,ENSCAFG00000027318,ENSCAFG00000026712,Q9XSY8_CANFA,NTHL1,SLC9A3R2,ZNF598,SYNGR3
333	BrS	25	54164256	54528822	364567	0.0025974	0.0392923	11	ANO7,HDLBP,SEPT2,FARP2,STK25,THAP4,ATG4B,DTYMK,ING5,D2HGDH,GAL3ST2
334	EBD	4	71695867	72060429	364563	0.00249377	0.0392923	7	C7,CARD6,ENSCAFG00000023387,ENSCAFG00000026199,PRKAA1,TTC33,NP_001003054.1
335	CoS	1	8722224	9086282	364059	0.00252525	0.0392923	1
336	ESt	6	13325171	13689158	363988	0.0025	0.0392923	8	Q6RY88_CANFA,KPNA7,ENSCAFG00000021003,SMURF1,XM_845972.1,ENSCAFG00000015164,TRRAP,TMEM130
337	LRe	1	8346022	8709384	363363	0.00246914	0.0392923	1	ENSCAFG00000000030
338	CoS	12	34495010	34857665	362656	0.00252525	0.0392923	2	ENSCAFG00000002537,ENSCAFG00000026030
339	Sci	36	3492257	3854728	362472	0.00248139	0.0392923	4	ENSCAFG00000024530,ENSCAFG00000022972,ENSCAFG00000009172,ENSCAFG00000025972
340	ShP	13	21787930	22149713	361784	0.0027027	0.0392923	6	TAF2,ENSCAFG00000000879,DSCC1,ENSCAFG00000000883,DEPDC6,COL14A1
341	BoC	5	6872999	7233793	360795	0.00245098	0.0392923	3	ENSCAFG00000020853,SNX19,ENSCAFG00000023101
342	ShP	X	81387099	81747795	360697	0.0027027	0.0392923	2	ENSCAFG00000017847,ENSCAFG00000017850
343	EBD	2	80709265	81069612	360348	0.00249377	0.0392923	4	ENSCAFG00000014958,EIF4G3,ENSCAFG00000021523,HP1BP3
344	NSD	32	38216504	38576719	360216	0.00255754	0.0392923	1
345	Sci	24	11331804	11691906	360103	0.00248139	0.0392923	2	FLRT3,
346	GSh	1	7451884	7811190	359307	0.00248139	0.0392923	2	ZNF407,ENSCAFG00000026962
347	Dob	24	27427371	27785680	358310	0.00242718	0.0392923	16	CEP250,XM_542976.2,C20orf173,ERGIC3,ENSCAFG00000008154,SPAG4,RBM12,NFS1,ROMO1,RBM39,ENSCAFG00000028218,ENSCAFG00000027513,ENSCAFG00000020899,PHF20,ENSCAFG00000027958,ENSCAFG00000020822
348	CoS	17	33683552	34041766	358215	0.00252525	0.0392923	8	ENSCAFG00000027584,XM_532938.2,GALM,SFRS7,ENSCAFG00000006297,GEMIN6,DHX57,MORN2
349	TYo	13	6200154	6558190	358037	0.00248139	0.0392923	2	GRHL2,NCALD
350	NSD	37	33209306	33567161	357856	0.00255754	0.0392923	1
351	Eur	5	4664452	5022265	357814	0.0025974	0.0392923	1
352	ESt	21	6602481	6959775	357295	0.0025	0.0392923	1	ENSCAFG00000026119
353	ShP	13	5389511	5744993	355483	0.0027027	0.0392923	3	ANKRD46,SNX31,PABPC1
354	BoC	3	38450206	38804687	354482	0.00245098	0.0392923	22	ENSCAFG00000026167,XP_856029.1,ENSCAFG00000025929,ENSCAFG00000026413,ENSCAFG00000026453,ENSCAFG00000026471,ENSCAFG00000022918,ENSCAFG00000022994,ENSCAFG00000022984,ENSCAFG00000022975,ENSCAFG00000022982,ENSCAFG00000022945,ENSCAFG00000022997,ENSCAFG00000022985,ENSCAFG00000022954,ENSCAFG00000022435,ENSCAFG00000022953,ENSCAFG00000028234,ENSCAFG00000027763,ENSCAFG00000026297,ENSCAFG00000027561,SNRPN
355	BeT	7	3938871	4293073	354203	0.00243902	0.0392923	8	ELF3,RNPEP,TIMM17A,ENSCAFG00000025451,ENSCAFG00000010633,IPO9,ENSCAFG00000010671,NAV1
356	Elk	27	48229205	48583324	354120	0.00245098	0.0392923	6	SLC25A18,XM_534937.2,BCL2L13,ENSCAFG00000022651,BID,ENSCAFG00000016211
357	StP	2	14153542	14507460	353919	0.0025	0.0392923	4	DNAJC1,MLLT10,ENSCAFG00000004150,C10orf140
358	Eur	2	14153542	14507460	353919	0.0025974	0.0392923	4	DNAJC1,MLLT10,ENSCAFG00000004150,C10orf140
359	LRe	11	49237846	49591546	353701	0.00246914	0.0392923	1	ENSCAFG00000009589
360	NSD	2	40380899	40733526	352628	0.00255754	0.0392923	1	ARHGAP26
361	BoT	10	10907439	11260040	352602	0.0025641	0.0392923	2	MSRB3,ENSCAFG00000027222
362	LRe	26	30968699	31320481	351783	0.00246914	0.0392923	6	BCR,CYTSA_CANFA,AA2AR_CANFA,UPB1,C22orf13,SNRPD3
363	ShP	7	42028136	42379687	351552	0.0027027	0.0392923	3	ENAH,LBR,ENSCAFG00000016296
364	NFd	3	51849664	52200995	351332	0.00251889	0.0392923	1	AKAP13
365	IrW	1	5816671	6167902	351232	0.00245098	0.0392923	3	MBP,ZNF236,ENSCAFG00000026120
366	JRT	9	43408253	43759163	350911	0.00249377	0.0392923	6	B6VH75_CANFA,TMEM98,ENSCAFG00000018364,XP_548273.2,ENSCAFG00000023088,ENSCAFG00000023058
367	LRe	10	48873222	49223755	350534	0.00246914	0.0392923	3	ZFP36L2,THADA_CANFA,ENSCAFG00000027631
368	NSD	24	4956330	5306144	349815	0.00255754	0.0392923	2	XRN2,ENSCAFG00000005214
369	BeT	19	44375990	44725740	349751	0.00243902	0.0392923	1
370	BoC	29	35661497	36009696	348200	0.00245098	0.0392923	3	FAM82B,CPNE3,CNGB3_CANFA
371	Bgl	24	27458530	27806654	348125	0.00255754	0.0392923	15	ERGIC3,ENSCAFG00000008154,SPAG4,RBM12,NFS1,ROMO1,RBM39,ENSCAFG00000028218,ENSCAFG00000027513,ENSCAFG00000020899,PHF20,ENSCAFG00000027958,ENSCAFG00000020822,SCAND1,C20orf152
372	BMD	24	27458530	27806654	348125	0.00241546	0.0392923	15	ERGIC3,ENSCAFG00000008154,SPAG4,RBM12,NFS1,ROMO1,RBM39,ENSCAFG00000028218,ENSCAFG00000027513,ENSCAFG00000020899,PHF20,ENSCAFG00000027958,ENSCAFG00000020822,SCAND1,C20orf152
373	JRT	5	79726286	80074325	348040	0.00249377	0.0392923	4	VAC14,ENSCAFG00000020167,ENSCAFG00000027583,ENSCAFG00000024182
374	JRT	1	18562518	18909765	347248	0.00249377	0.0392923	2	ENSCAFG00000022274,ENSCAFG00000028257
375	EBD	18	5449914	5796973	347060	0.00249377	0.0392923	1
376	ShP	6	42351127	42697860	346734	0.0027027	0.0392923	12	XM_547195.2,TELO2,PTX4,CLCN7,ENSCAFG00000019581,GNPTG,C16orf42,BAIAP3,TRYM_CANFA,Q8HY49_CANFA,ENSCAFG00000019597,Q7YS15_CANFA
377	IrW	2	4370410	4716458	346049	0.00245098	0.0392923	3	CCNY,XM_843492.1,ENSCAFG00000026967
378	BoC	1	83690510	84036138	345629	0.00245098	0.0392923	1	GNAQ
379	NSD	11	34299001	34644184	345184	0.00255754	0.0392923	1	ENSCAFG00000027467
380	GSh	22	9730303	10075152	344850	0.00248139	0.0392923	2	C13orf31,CCDC122
381	EBD	2	20723763	21068544	344782	0.00249377	0.0392923	3	XM_855249.1,MPP7,ENSCAFG00000003866
382	GSh	12	58734694	59077858	343165	0.00248139	0.0392923	1	ENSCAFG00000022961
383	Eur	2	3409177	3751326	342150	0.0025974	0.0392923	2	ENSCAFG00000028129,ENSCAFG00000003667
384	NSD	19	23318694	23660550	341857	0.00255754	0.0392923	7	ENSCAFG00000024065,ENSCAFG00000004202,ENSCAFG00000022684,FAM123C,ENSCAFG00000004207,ENSCAFG00000027456,ENSCAFG00000004209
385	BMD	20	50550032	50891872	341841	0.00241546	0.0392923	14	Q6W6U9_CANFA,Q6W6U1_CANFA,ENSCAFG00000026208,Q70ZI0_CANFA,Q70ZF0_CANFA,Q70ZI2_CANFA,Q70ZG0_CANFA,Q70ZB5_CANFA,Q70ZJ1_CANFA,Q6W6S9_CANFA,Q70ZI9_CANFA,Q70ZG8_CANFA,ENSCAFG00000016245,ENSCAFG00000016251
386	IrW	20	50550032	50891872	341841	0.00245098	0.0392923	14	Q6W6U9_CANFA,Q6W6U1_CANFA,ENSCAFG00000026208,Q70ZI0_CANFA,Q70ZF0_CANFA,Q70ZI2_CANFA,Q70ZG0_CANFA,Q70ZB5_CANFA,Q70ZJ1_CANFA,Q6W6S9_CANFA,Q70ZI9_CANFA,Q70ZG8_CANFA,ENSCAFG00000016245,ENSCAFG00000016251
387	BMD	2	80709265	81050769	341505	0.00241546	0.0392923	2	ENSCAFG00000014958,EIF4G3
388	GSh	21	4828296	5167943	339648	0.00248139	0.0392923	1	ENSCAFG00000022278
389	TYo	24	23374400	23713279	338880	0.00248139	0.0392923	16	TBC1D20,RBCK1,TRIB3,ENSCAFG00000006969,NRSN2,SOX12,ENSCAFG00000025241,ZCCHC3,C20orf96,Q30KS2_CANFA,Q30KS5_CANFA,Q30KS6_CANFA,Q30KS7_CANFA,Q30KS8_CANFA,Q30KR5_CANFA,Q30KS9_CANFA
390	BeT	1	5071181	5409783	338603	0.00243902	0.0392923	1
391	StP	15	30817387	31155720	338334	0.0025	0.0392923	1
392	JRT	8	24307944	24646224	338281	0.00249377	0.0392923	1	ENSCAFG00000026201
393	GSh	19	15395096	15733030	337935	0.00248139	0.0392923	1	PGRMC2
394	BeT	5	66571130	66909003	337874	0.00243902	0.0392923	18	XM_546767.2,ENSCAFG00000019801,GAS8,DBNDD1,DEF8,Q9N0F8_CANFA,cfa-mir-220a,MSHR_CANFA,TCF25,SPIRE2,FANCA,ZNF276,C16orf7,SPATA2L,CDK10,C16orf55,XM_546776.2,DPEP1
395	NFd	14	37168210	37505424	337215	0.00251889	0.0392923	2	ENSCAFG00000026121,ITGB8
396	EBD	5	34738198	35075059	336862	0.00249377	0.0392923	22	Q8MJY0_CANFA,PLD2,PSMB6,GLTPD2,VMO1,TM4SF5,ZMYND15,CXCL16,MED11,ARRB2,ENSCAFG00000022618,PELP1,ALOX15,ENSCAFG00000023009,ALOX12,RNASEK,C17orf49,cfa-mir-195,cfa-mir-497,BCL6B,SLC16A13,SLC16A11
397	ShP	11	53807070	54142507	335438	0.0027027	0.0392923	9	DCAF12,ENSCAFG00000020955,ENSCAFG00000025469,XM_847340.1,KIF24,NUDT2,ENSCAFG00000024776,C9orf24,C9orf25
398	BeT	22	11331278	11665737	334460	0.00243902	0.0392923	2	AKAP11,DGKH
399	Eur	2	6233946	6567915	333970	0.0025974	0.0392923	1	NRP1
400	Sci	6	39549562	39883104	333543	0.00248139	0.0392923	13	Q8SPS5_CANFA,UBN1,GLYR1,ROGDI,SEPT12,ZNF500,C16orf71,ANKS3,NUDT16L1,MGRN1,FAM100A,ENSCAFG00000023563,XM_859149.1
401	Sci	37	7468455	7801853	333399	0.00248139	0.0392923	1
402	TYo	7	48586933	48919908	332976	0.00248139	0.0392923	1	ENSCAFG00000021711
403	BMD	6	54350507	54683066	332560	0.00241546	0.0392923	1
404	Elk	27	47856604	48189061	332458	0.00245098	0.0392923	7	CECR5,ENSCAFG00000022484,XM_849703.1,CECR1,ENSCAFG00000021131,ENSCAFG00000016131,CECR2
405	BoC	5	36866416	37198278	331863	0.00245098	0.0392923	3	STX8,WDR16,USP43
406	GSh	6	26881144	27212714	331571	0.00248139	0.0392923	3	XM_536943.2,ENSCAFG00000024044,XM_547099.2
407	Elk	19	23049079	23380530	331452	0.00245098	0.0392923	2	ENSCAFG00000025874,ENSCAFG00000021983
408	NSD	20	44001043	44331745	330703	0.00255754	0.0392923	3	MAP4,DHX30,SMARCC1
409	Elk	2	6038060	6368337	330278	0.00245098	0.0392923	1
410	EBD	23	4231110	4561104	329995	0.00249377	0.0392923	7	ACSS1,VSX1,ENTPD6,PYGB,ENSCAFG00000021341,ABHD12,ENSCAFG00000004391
411	BMD	20	23697631	24027068	329438	0.00241546	0.0392923	2	ENSCAFG00000026497,FOXP1
412	StP	10	11758427	12087526	329100	0.0025	0.0392923	3	HELB,GRIP1,ENSCAFG00000012238
413	ShP	9	14324095	14653190	329096	0.0027027	0.0392923	4	ENSCAFG00000013074,TANC2,CYB561,Q3HTU3_CANFA
414	BoT	7	58903120	59231501	328382	0.0025641	0.0392923	2	NOL4,ASXL3
415	NFd	8	17163921	17492159	328239	0.00251889	0.0392923	5	INSM2,RALGAPA1,ENSCAFG00000028355,ENSCAFG00000026856,BRMS1L
416	JRT	10	11231464	11559700	328237	0.00249377	0.0392923	1	ENSCAFG00000022943
417	GSh	21	27509206	27837114	327909	0.00248139	0.0392923	3	XM_856012.1,PLEKHB1,FAM168A
418	GSh	5	66716173	67043806	327634	0.00248139	0.0392923	14	TCF25,SPIRE2,FANCA,ZNF276,C16orf7,SPATA2L,CDK10,C16orf55,XM_546776.2,DPEP1,CPNE7,RPL13,ENSCAFG00000021886,SPG7
419	EBD	9	3321882	3649331	327450	0.00249377	0.0392923	25	TSPAN10,ASPSCR1,NOTUM,MYADML2,PYCR1,MAFG,SIRT7,PCYT2,ANAPC11,THOC4,ARHGDIA,P4HB,DYSFIP1,FAM195B,GCGR,MRPL12,HGS,ARL16,CCDC137,C17orf90,CNRG_CANFA,NPLOC4,C17orf70,Q1XF14_CANFA,Q38QA2_CANFA
420	Sci	18	32862791	33189957	327167	0.00248139	0.0392923	2	XM_845338.1,ENSCAFG00000028136
421	IrW	31	21801058	22127686	326629	0.00245098	0.0392923	1
422	JRT	36	4819476	5145590	326115	0.00249377	0.0392923	1	ENSCAFG00000027157
423	BeT	1	4726432	5052084	325653	0.00243902	0.0392923	1
424	BMD	25	4523552	4848097	324546	0.00241546	0.0392923	2	ENSCAFG00000005998,ENSCAFG00000025601
425	Elk	2	49267805	49591384	323580	0.00245098	0.0392923	2	cfa-mir-582,ENSCAFG00000023164
426	ESt	9	27168219	27490260	322042	0.0025	0.0392923	7	NPEPPS,KPNB1,TBKBP1,TBX21,OSBPL7,MRPL10,LRRC46
427	EBD	37	14281332	14602407	321076	0.00249377	0.0392923	5	NOP58,ENSCAFG00000022013,BMPR2,ENSCAFG00000026714,FAM117B
428	ESt	3	43472851	43793652	320802	0.0025	0.0392923	1	ADAMTS17
429	Elk	21	3603803	3924349	320547	0.00245098	0.0392923	2	ARHGAP42,ENSCAFG00000027529
430	BeT	21	3603803	3924349	320547	0.00243902	0.0392923	2	ARHGAP42,ENSCAFG00000027529
431	ESt	21	3603803	3924349	320547	0.0025	0.0392923	2	ARHGAP42,ENSCAFG00000027529
432	Eur	21	3603803	3924349	320547	0.0025974	0.0392923	2	ARHGAP42,ENSCAFG00000027529
433	JRT	X	42272821	42593220	320400	0.00249377	0.0392923	6	CACNA1F,CCDC22,FOXP3,PPP1R3F,XM_850302.1,ENSCAFG00000015951
434	NSD	24	11351154	11670994	319841	0.00255754	0.0392923	2	FLRT3,
435	Elk	24	11351154	11670994	319841	0.00245098	0.0392923	2	FLRT3,
436	StP	37	25947421	26266879	319459	0.0025	0.0392923	5	MREG,PECR,XM_847688.1,XRCC5,MARCH4
437	IrW	22	11383771	11702579	318809	0.00245098	0.0392923	2	AKAP11,DGKH
438	IrW	36	22935867	23253791	317925	0.00245098	0.0392923	9	HOXD12,HOXD11,HOXD9,HOXD10,HOXD8,cfa-mir-10b,HOXD4,HOXD3,MTX2
439	JRT	25	7365320	7683215	317896	0.00249377	0.0392923	3	ENSCAFG00000027990,ENSCAFG00000024986,XM_534496.2
440	NFd	11	43008412	43326235	317824	0.00251889	0.0392923	2	MLLT3,ENSCAFG00000027375
441	ESt	21	7170419	7487293	316875	0.0025	0.0392923	1	XM_543064.2
442	Dob	4	56128567	56444979	316413	0.00242718	0.0392923	4	ITK,FAM71B,MED7,HAVCR1
443	Eur	2	4810250	5126380	316131	0.0025974	0.0392923	2	ENSCAFG00000003687,CUL2
444	Sci	2	52759797	53075220	315424	0.00248139	0.0392923	2	ENSCAFG00000007276,RNF180
445	EBD	18	4811161	5126421	315261	0.00249377	0.0392923	2	A0JL50_CANFA,GRB10
446	Eur	37	7290847	7605593	314747	0.0025974	0.0392923	1
447	BMD	22	29753041	30067743	314703	0.00241546	0.0392923	5	ENSCAFG00000025816,C13orf37,C13orf34,DIS3,PIBF1
448	JRT	12	42388228	42702885	314658	0.00249377	0.0392923	3	ENSCAFG00000028070,ENSCAFG00000023918,ENSCAFG00000028155
449	JRT	9	35320954	35635551	314598	0.00249377	0.0392923	1	MSI2
450	ESt	37	14677603	14991934	314332	0.0025	0.0392923	6	WDR12,ICA1L,ALS2CR8,XM_545602.2,XM_846559.1,NBEAL1
451	BeT	4	31269365	31583434	314070	0.00243902	0.0392923	1
452	EBD	28	29103447	29417289	313843	0.00249377	0.0392923	1	ATRNL1
453	BMD	X	18745208	19058925	313718	0.00241546	0.0392923	2	ENSCAFG00000013344,B8PZT1_CANFA
454	Elk	4	7000827	7314362	313536	0.00245098	0.0392923	2	NID1,LYST
455	Sci	16	7683902	7997352	313451	0.00248139	0.0392923	1
456	ESt	19	8559398	8872405	313008	0.0025	0.0392923	1
457	BeT	15	22499212	22810896	311685	0.00243902	0.0392923	4	ENSCAFG00000026389,ZDHHC17,RPL23AP53,CSRP2
458	BMD	1	96316804	96627347	310544	0.00241546	0.0392923	6	ENSCAFG00000023391,ENSCAFG00000027926,JAK2,INSL6,RELX_CANFA,LOC609677
459	BMD	2	14153542	14463802	310261	0.00241546	0.0392923	3	DNAJC1,MLLT10,ENSCAFG00000004150
460	Dob	1	64376547	64686603	310057	0.00242718	0.0392923	1	ENSCAFG00000028093
461	ESt	22	37407325	37716885	309561	0.0025	0.0392923	1
462	JRT	10	19815401	20123248	307848	0.00249377	0.0392923	13	SBF1,ENSCAFG00000000620,ENSCAFG00000023555,FAM116B,PLXNB2,MAPK12,HDAC10,TUBGCP6,XM_538315.2,XM_843624.1,TRABD,PANX2,MOV10L1
463	Dob	37	14809394	15117211	307818	0.00242718	0.0392923	6	ALS2CR8,XM_545602.2,XM_846559.1,NBEAL1,ENSCAFG00000021512,CYP20A1
464	GSh	37	14809394	15117211	307818	0.00248139	0.0392923	6	ALS2CR8,XM_545602.2,XM_846559.1,NBEAL1,ENSCAFG00000021512,CYP20A1
465	BMD	13	6200154	6507623	307470	0.00241546	0.0392923	2	GRHL2,NCALD
466	Sci	12	29448005	29755351	307347	0.00248139	0.0392923	1
467	Dob	18	32906405	33213165	306761	0.00242718	0.0392923	2	XM_845338.1,ENSCAFG00000028136
468	EBD	11	23234061	23540643	306583	0.00249377	0.0392923	4	ACSL6,IL3_CANFA,CSF2_CANFA,P4HA2
469	Dob	9	36907558	37213218	305661	0.00242718	0.0392923	8	TRIM37,ENSCAFG00000017578,cfa-mir-454,ENSCAFG00000017581,cfa-mir-301a,PRR11,C17orf71,GDPD1
470	GSh	24	6263684	6567283	303600	0.00248139	0.0392923	5	C20orf26,CRNKL1,NAT5,ENSCAFG00000005360,RIN2
471	GSh	7	24214489	24517449	302961	0.00248139	0.0392923	1	RASAL2
472	Dob	7	24214489	24517449	302961	0.00242718	0.0392923	1	RASAL2
473	TYo	34	8924771	9227501	302731	0.00248139	0.0392923	4	MTRR,FASTKD3,C5orf49,ADCY2
474	StP	14	35882796	36185446	302651	0.0025	0.0392923	1	HDAC9
475	Dob	1	27173712	27473960	300249	0.00242718	0.0392923	3	ENSCAFG00000020845,MC2R,MC5R
476	GSh	24	5268516	5567190	298675	0.00248139	0.0392923	3	ENSCAFG00000005214,ENSCAFG00000005232,ENSCAFG00000027317
477	TYo	5	19436463	19734361	297899	0.00248139	0.0392923	4	PAFAH1B2,ENSCAFG00000022359,SIK3,ENSCAFG00000027801
478	TYo	30	21393768	21691192	297425	0.00248139	0.0392923	3	ONECUT1,ENSCAFG00000023634,ENSCAFG00000020936
479	BMD	1	58366145	58661904	295760	0.00241546	0.0392923	3	Q6JDJ2_CANFA,KIF25,FRMD1
480	EBD	29	4184259	4478982	294724	0.00249377	0.0392923	1	ENSCAFG00000027779
481	BeT	13	51246757	51539816	293060	0.00243902	0.0392923	4	ENSCAFG00000002200,ENSCAFG00000027026,KIAA1211,AASDH
482	EBD	X	106198469	106491229	292761	0.00249377	0.0392923	3	RAP2C,MBNL3,ENSCAFG00000022191
483	GSh	21	23837695	24130251	292557	0.00248139	0.0392923	5	LOC607573,ENSCAFG00000004857,C11orf67,ENSCAFG00000011455,RSF1
484	Dob	21	23837695	24130251	292557	0.00242718	0.0392923	5	LOC607573,ENSCAFG00000004857,C11orf67,ENSCAFG00000011455,RSF1
485	ESt	25	7443265	7735263	291999	0.0025	0.0392923	2	ENSCAFG00000024986,XM_534496.2
486	EBD	11	49319964	49611899	291936	0.00249377	0.0392923	1	ENSCAFG00000009589
487	Elk	X	69977089	70268881	291793	0.00245098	0.0392923	3	DACH2,ENSCAFG00000017412,ENSCAFG00000022905
488	Sci	2	55934685	56225975	291291	0.00248139	0.0392923	1
489	Dob	24	11351154	11641902	290749	0.00242718	0.0392923	2	FLRT3,
490	BMD	23	44086773	44377429	290657	0.00241546	0.0392923	1	PLOD2
491	Elk	14	45964339	46254864	290526	0.00245098	0.0392923	3	ENSCAFG00000028192,NOD1,GGCT
492	EBD	18	7440753	7730274	289522	0.00249377	0.0392923	1
493	Sci	23	18738998	19027045	288048	0.00248139	0.0392923	3	ZCWPW2,AZI2,CMC1
494	BMD	18	6465087	6751027	285941	0.00241546	0.0392923	1
495	Dob	3	18151730	18437521	285792	0.00242718	0.0392923	1	FAM172A
496	GSh	9	24916897	25202544	285648	0.00248139	0.0392923	13	ENSCAFG00000023561,ELN,ENSCAFG00000022927,KRTAP3-1,ENSCAFG00000015992,ENSCAFG00000015994,ENSCAFG00000027348,KRT40,KRT39,KRT23,KRT20,A3RF35_CANFA,K1C10_CANFA
497	TYo	13	11920014	12204152	284139	0.00248139	0.0392923	3	EIF3E,ENSCAFG00000000705,XM_847922.1
498	GSh	21	6368063	6651944	283882	0.00248139	0.0392923	1	ENSCAFG00000013779
499	EBD	5	40041289	40325104	283816	0.00249377	0.0392923	1	ENSCAFG00000025743
500	BeT	3	3593045	3875619	282575	0.00243902	0.0392923	1
501	EBD	11	45935233	46216701	281469	0.00249377	0.0392923	1	HMGN1
502	TYo	25	20923206	21204535	281330	0.00248139	0.0392923	3	Q8SPL9_CANFA,ENSCAFG00000007321,ZMYM2
503	TYo	13	11496408	11777117	280710	0.00248139	0.0392923	1	RSPO2
504	GSh	12	34600608	34880965	280358	0.00248139	0.0392923	2	ENSCAFG00000002537,ENSCAFG00000026030
505	GSh	19	38453075	38732848	279774	0.00248139	0.0392923	3	GPR39,LYPD1,ENSCAFG00000005003
506	TYo	3	42088959	42368395	279437	0.00248139	0.0392923	4	TARSL2,ENSCAFG00000021728,TM2D3,XM_844548.1
507	GSh	21	5294038	5572308	278271	0.00248139	0.0392923	1	ENSCAFG00000025627
508	BeT	32	3228060	3506025	277966	0.00243902	0.0392923	5	USO1,ENSCAFG00000021125,PPEF2,ENSCAFG00000022454,SDAD1
509	GSh	3	61582117	61860018	277902	0.00248139	0.0392923	5	MRFAP1,S100P,CNO,KIAA0232,TBC1D14
510	BeT	6	60738555	61015532	276978	0.00243902	0.0392923	1	ZNF644
511	BeT	15	42201586	42478062	276477	0.00243902	0.0392923	7	ENSCAFG00000006734,UHRF1BP1L,ENSCAFG00000023210,ENSCAFG00000006711,ACTR6,SCYL2,SLC17A8
512	GSh	15	14825871	15102275	276405	0.00248139	0.0392923	1
513	GSh	8	72802774	73076896	274123	0.00248139	0.0392923	2	PPP2R5C,DYNC1H1
514	BMD	19	15460480	15733030	272551	0.00241546	0.0392923	1	PGRMC2
515	Dob	20	48763652	49036004	272353	0.00242718	0.0392923	8	SIN3B,NWD1,TMEM38A,C19orf42,MED26,SLC35E1,CHERP,C19orf44
516	Dob	3	61244168	61516442	272275	0.00242718	0.0392923	3	DNAJA4,WDR61,PPP2R2C
517	BMD	6	45390026	45662210	272185	0.00241546	0.0392923	12	AMIGO1,CYB561D1,ATXN7L2,SYPL2,ENSCAFG00000019832,PSMA5,SORT1,ENSCAFG00000026615,MYBPHL,PSRC1,CELSR2,SARS
518	BMD	25	4065978	4337127	271150	0.00241546	0.0392923	1	ENSCAFG00000005968
519	Dob	2	64334086	64603071	268986	0.00242718	0.0392923	3	IRX3,ENSCAFG00000027975,FTO
520	Dob	3	75670037	75938480	268444	0.00242718	0.0392923	7	C4orf34,ENSCAFG00000024013,LIAS,RPL9,KLB,RFC1,ENSCAFG00000026870
521	Dob	19	18869841	19137859	268019	0.00242718	0.0392923	1	ANKRD50
522	BMD	11	45860080	46126703	266624	0.00241546	0.0392923	2	ENSCAFG00000021101,HMGN1
523	BMD	1	104191350	104457265	265916	0.00241546	0.0392923	12	ZIM2,ENSCAFG00000023268,ENSCAFG00000002441,XM_541384.2,ENSCAFG00000002443,XM_541386.2,XM_541387.1,XM_848761.1,XM_548675.2,ENSCAFG00000002453,ENSCAFG00000021551,ZNF707
524	Dob	17	19890266	20156037	265772	0.00242718	0.0392923	1
525	Dac	23	32982106	33401748	419643	0.00514139	0.0654467	3	ENSCAFG00000022988,TMEM108,BFSP2
526	Gry	1	59866663	60272887	406225	0.0049505	0.0654467	14	DSE,APEX1,XM_541206.2,FAM26F,BET3L,FAM26E,FAM26D,RWDD1,XM_850267.1,RSHL1,ZUFSP,KPNA5,FAM162B,GPRC6A
527	Dac	6	49832241	50236868	404628	0.00514139	0.0654467	2	RNPC3,ENSCAFG00000024626
528	Dac	9	48195161	48599760	404600	0.00514139	0.0654467	9	ENSCAFG00000019078,RNMTL1,GLOD4,ENSCAFG00000019127,GEMIN4,FAM57A,VPS53,FAM101B,C17orf97
529	Gry	29	4184259	4584821	400563	0.0049505	0.0654467	2	ENSCAFG00000027779,ENSCAFG00000006643
530	Gry	35	3100835	3500198	399364	0.0049505	0.0654467	5	ENSCAFG00000009134,ENSCAFG00000027794,ENSCAFG00000025137,ENSCAFG00000009151,ENSCAFG00000025055
531	Gry	18	7958203	8349052	390850	0.0049505	0.0654467	3	ENSCAFG00000027740,ENSCAFG00000020721,VSTM2A
532	FSp	24	45774308	46140693	366386	0.00508906	0.0654467	4	C20orf85,ANKRD60,PPP4R1L,RB22A_CANFA
533	Rtw	12	10198426	10563385	364960	0.00488998	0.0654467	4	ENSCAFG00000023191,ENSCAFG00000027765,XM_538898.2,
534	FSp	5	6489792	6854115	364324	0.00508906	0.0654467	2	ENSCAFG00000021116,ENSCAFG00000026662
535	GSl	27	41272356	41636206	363851	0.00515464	0.0654467	22	CD4_CANFA,LAG3,PTMS,MLF2,COPS7A,C12orf53,ZNF384,ING4,ACRBP,LPAR5,CHD4,ENSCAFG00000028364,NOP2,IFFO1,G3P_CANFA,NCAPD2,ENSCAFG00000028127,MRPL51,VAMP1,TAPBPL,CD27,LTBR
536	GSl	5	45217395	45576890	359496	0.00515464	0.0654467	3	MPRIP,TNFRSF13B,USP22
537	GSl	5	65436228	65795145	358918	0.00515464	0.0654467	6	SLC2A5,GPR157,cfa-mir-34a,H6PD,SPSB1,SLC25A33
538	Wei	22	29815184	30173318	358135	0.00492611	0.0654467	5	C13orf37,C13orf34,DIS3,PIBF1,KLF5
539	FSp	32	21355819	21710219	354401	0.00508906	0.0654467	1
540	Wei	1	59576626	59930988	354363	0.00492611	0.0654467	3	WDR27,DSE,APEX1
541	GSl	9	23045640	23399439	353800	0.00515464	0.0654467	20	Q95JC2_CANFA,DHX8,ARL4D,ENSCAFG00000021609,ENSCAFG00000022014,ENSCAFG00000022981,ENSCAFG00000022977,ENSCAFG00000022914,ENSCAFG00000022928,ENSCAFG00000020861,ENSCAFG00000021155,TMEM106A,NBR1,BRCA1_CANFA,RND2,VAT1,IFI35,RL27_CANFA,RUNDC1,AARSD1
542	FSp	24	3307782	3657881	350100	0.00508906	0.0654467	2	CD93,TRBM_CANFA
543	Wei	19	8142392	8487032	344641	0.00492611	0.0654467	1
544	FSp	5	31385967	31729509	343543	0.00508906	0.0654467	1	DYNC2H1
545	FSp	2	3409177	3751326	342150	0.00508906	0.0654467	2	ENSCAFG00000028129,ENSCAFG00000003667
546	GSl	33	17758022	18098744	340723	0.00515464	0.0654467	1
547	GSl	25	12839764	13179564	339801	0.00515464	0.0654467	2	ENSCAFG00000022427,UBL3
548	CoS	3	42953287	43292397	339111	0.00505051	0.0654467	4	ALDH1A3,XM_533248.2,ASB7,LINS1
549	FSp	5	14853533	15191694	338162	0.00508906	0.0654467	3	cfa-mir-99a-2,cfa-let-7a-2,cfa-mir-125b-1
550	FSp	19	15395096	15733030	337935	0.00508906	0.0654467	1	PGRMC2
551	GSl	24	6100890	6438675	337786	0.00515464	0.0654467	5	C20orf26,CRNKL1,NAT5,ENSCAFG00000005360,RIN2
552	CoS	10	12360627	12696221	335595	0.00505051	0.0654467	2	ENSCAFG00000000392,CAND1
553	FSp	13	7868035	8197127	329093	0.00508906	0.0654467	3	DCAF13,ENSCAFG00000024711,RIMS2
554	CoS	12	38819092	39147611	328520	0.00505051	0.0654467	1	CD109
555	CoS	11	18086068	18413721	327654	0.00505051	0.0654467	4	ENSCAFG00000027126,ENSCAFG00000024837,SNW1,XP_849864.1
556	Bgl	25	4523552	4848097	324546	0.00511509	0.0654467	2	ENSCAFG00000005998,ENSCAFG00000025601
557	BoT	31	4877798	5200387	322590	0.00512821	0.0654467	2	CADM2,ENSCAFG00000027182
558	LRe	36	4709352	5031771	322420	0.00493827	0.0654467	1
559	BoC	11	7003769	7326005	322237	0.00490196	0.0654467	1	KCNN2
560	BoT	2	74236624	74558793	322170	0.00512821	0.0654467	6	PTPRU,MECR,ENSCAFG00000021599,SFRS4,XM_849712.1,EPB41
561	BoT	2	41557213	41878501	321289	0.00512821	0.0654467	2	YIPF5,ENSCAFG00000006326
562	CoS	21	3603803	3924349	320547	0.00505051	0.0654467	2	ARHGAP42,ENSCAFG00000027529
563	Bgl	21	3603803	3924349	320547	0.00511509	0.0654467	2	ARHGAP42,ENSCAFG00000027529
564	LRe	11	56413396	56732345	318950	0.00493827	0.0654467	4	PAX5,ENSCAFG00000024624,ENSCAFG00000022959,XM_538733.2
565	CoS	19	7739904	8058198	318295	0.00505051	0.0654467	3	XM_845072.1,ENSCAFG00000003756,PCDH18
566	BoT	7	57255724	57573707	317984	0.00512821	0.0654467	2	GALNT1,INO80C
567	BoC	22	22805317	23122952	317636	0.00490196	0.0654467	1
568	FSp	3	11398372	11713985	315614	0.00508906	0.0654467	2	SLCO6A1,SLCO4C1
569	NFd	33	8182384	8497935	315552	0.00503778	0.0654467	13	ENSCAFG00000024160,ENSCAFG00000025521,ENSCAFG00000027130,OR5K4,ENSCAFG00000025450,ENSCAFG00000025446,ENSCAFG00000025444,ENSCAFG00000009158,GSTA4,CLDND1,GPR15,ENSCAFG00000026791,CPOX
570	BoC	16	11257538	11570550	313013	0.00490196	0.0654467	7	NDUFB2,ADCK2,DENND2A,ENSCAFG00000022071,MKRN1,RAB19,SLC37A3
571	IrW	1	114971921	115284368	312448	0.00490196	0.0654467	11	PAFAH1B3,CIC,ERF,GSK3A,ZNF526,DEDD2,POU2F2,ZNF574,GRIK5,ATP1A3,PRAF1_CANFA
572	IrW	29	14848428	15160856	312429	0.00490196	0.0654467	1	NP_001003196.1
573	FSp	21	23901429	24213847	312419	0.00508906	0.0654467	6	LOC607573,C11orf67,ENSCAFG00000011455,RSF1,ICLN_CANFA,AQP11
574	BoC	24	9391376	9703650	312275	0.00490196	0.0654467	2	KIF16B,ENSCAFG00000027316
575	CoS	1	37624807	37934337	309531	0.00505051	0.0654467	1	AIG1
576	CoS	25	4595401	4903222	307822	0.00505051	0.0654467	1	ENSCAFG00000025601
577	CoS	1	109628709	109935602	306894	0.00505051	0.0654467	26	MED25,FUZ,AP2A1,TSKS,CPT1C,SCAF1,PRMT1,ENSCAFG00000021272,BCL2L12,IRF3,RRAS,PRR12,PRRG2,NOSIP,RCN3,Q9XSU4_CANFA,FCGRT,cfa-mir-150,ENSCAFG00000021944,NP_001003350.1,ENSCAFG00000025861,ENSCAFG00000026335,ENSCAFG00000022178,ENSCAFG00000025994,ALDH16A1,PIH1D1
578	IrW	1	64201019	64507570	306552	0.00490196	0.0654467	1
579	CoS	1	66473894	66779251	305358	0.00505051	0.0654467	1	NKAIN2
580	IrW	10	4255193	4553741	298549	0.00490196	0.0654467	8	ENSCAFG00000000178,SHMT2,NDUFA4L2,STAC3,R3HDM2,INHBC,INHBE,GLI1
581	JRT	31	6269836	6567479	297644	0.00498753	0.0654467	1
582	StP	22	41989481	42286788	297308	0.005	0.0654467	1
583	StP	9	36812653	37107410	294758	0.005	0.0654467	9	PPM1E,TRIM37,ENSCAFG00000017578,cfa-mir-454,ENSCAFG00000017581,cfa-mir-301a,PRR11,C17orf71,GDPD1
584	CoS	30	3008317	3302865	294549	0.00505051	0.0654467	8	ENSCAFG00000014097,OR4K2,OR4K5,ENSCAFG00000024256,OR4K15,OR4F15,XM_544580.2,ENSCAFG00000024251
585	IrW	25	5377908	5672242	294335	0.00490196	0.0654467	1	UFM1
586	Elk	9	12744112	13030246	286135	0.00490196	0.0654467	4	ENSCAFG00000013608,CRHR1,XM_537606.2,NSF
587	StP	13	10299977	10584164	284188	0.005	0.0654467	3	ENSCAFG00000026254,OXR1,
588	Sci	11	25690067	25972581	282515	0.00496278	0.0654467	8	PHF15,SAR1B,SEC24A,ENSCAFG00000001039,CAMLG,DDX46,C5orf24,TXNDC15
589	Elk	20	15146854	15429136	282283	0.00490196	0.0654467	1	ENSCAFG00000005604
590	Sci	17	6507959	6790081	282123	0.00496278	0.0654467	1
591	Sci	31	28449122	28730074	280953	0.00496278	0.0654467	1	ENSCAFG00000024282
592	Sci	11	27658868	27939754	280887	0.00496278	0.0654467	2	SPOCK1,ENSCAFG00000001121
593	Sci	18	32335423	32615344	279922	0.00496278	0.0654467	1
594	EBD	13	40176696	40453518	276823	0.00498753	0.0654467	12	ZC3H3,GSDMD,EEF1D,TIGD5,PYCRL,TSTA3,ENSCAFG00000023744,MAPK15,FAM83H,SCRIB,PUF60,NRBP2
595	EBD	8	45121217	45392329	271113	0.00498753	0.0654467	2	ENSCAFG00000028171,ENSCAFG00000016489
596	GSh	9	59936544	60204605	268062	0.00496278	0.0654467	4	Q865U7_CANFA,ENSCAFG00000023311,ENSCAFG00000020172,ENSCAFG00000027902
597	GSh	6	43927209	44193880	266672	0.00496278	0.0654467	6	CEPT1,DRAM2,C1orf103,ENSCAFG00000019771,CD53,Q70Z55_CANFA
598	GSh	1	9430500	9696621	266122	0.00496278	0.0654467	1
599	GSh	29	4191049	4457138	266090	0.00496278	0.0654467	1	ENSCAFG00000027779
600	BMD	35	3236496	3500198	263703	0.00483092	0.0654467	3	ENSCAFG00000025137,ENSCAFG00000009151,ENSCAFG00000025055
601	Eur	4	31103715	31410122	306408	0.00519481	0.0655199	2	ENSCAFG00000022005,ENSCAFG00000026048
602	Eur	17	52387238	52688822	301585	0.00519481	0.0655199	5	XM_533005.2,ENSCAFG00000008835,EGR4,FBXO41,XM_847796.1
603	Eur	1	3212349	3510865	298517	0.00519481	0.0655199	4	ENPP1,ENSCAFG00000000002,ENSCAFG00000000004,PARD6G
604	Eur	25	11513261	11803143	289883	0.00519481	0.0655199	3	XM_844765.1,XM_534514.2,B3GALTL
605	GRe	11	28496564	28861743	365180	0.0052356	0.0658165	10	ENSCAFG00000001135,MYOT,PKD2L2,FAM13B,WNT8A,NME5,ENSCAFG00000001165,BRD8,KIF20A,CDC23
606	GRe	16	27985302	28344329	359028	0.0052356	0.0658165	5	ENSCAFG00000021758,C8orf4,ENSCAFG00000027291,IDO2,IDO1
607	Gry	1	59166957	59536208	369252	0.00742574	0.0826116	3	ENSCAFG00000022342,ENSCAFG00000027898,THBS2
608	Gry	12	34600608	34962627	362020	0.00742574	0.0826116	2	ENSCAFG00000002537,ENSCAFG00000026030
609	Dac	16	7637966	7997352	359387	0.00771208	0.0826116	1
610	Dac	27	30723450	31078035	354586	0.00771208	0.0826116	3	AEBP2,ENSCAFG00000026090,PLEKHA5
611	Gry	22	25811972	26163105	351134	0.00742574	0.0826116	2	ENSCAFG00000022069,ENSCAFG00000026838
612	Rtw	10	48873222	49223755	350534	0.00733496	0.0826116	3	ZFP36L2,THADA_CANFA,ENSCAFG00000027631
613	Gry	4	77519858	77869489	349632	0.00742574	0.0826116	1	ENSCAFG00000028113
614	Rtw	5	64887855	65230874	343020	0.00733496	0.0826116	4	ENSCAFG00000019688,ENSCAFG00000023803,XM_546758.2,ENSCAFG00000019691
615	Dac	8	49531904	49874190	342287	0.00771208	0.0826116	6	PSN1_CANFA,ENSCAFG00000016823,NUMB,SDHD,HEATR4,ENSCAFG00000016842
616	Gry	1	96286007	96627347	341341	0.00742574	0.0826116	7	ENSCAFG00000021196,ENSCAFG00000023391,ENSCAFG00000027926,JAK2,INSL6,RELX_CANFA,LOC609677
617	Dac	20	5367665	5707575	339911	0.00771208	0.0826116	6	EEFSEC,DNAJB8,GATA2,ENSCAFG00000004144,RPN1,RAB7A_CANFA
618	GSl	14	11087016	11423162	336147	0.00773196	0.0826116	3	cfa-mir-129-1,SND1,LRRC4
619	GSl	23	44013903	44349751	335849	0.00773196	0.0826116	1	PLOD2
620	Dac	18	8558514	8893245	334732	0.00771208	0.0826116	2	SC61G_CANFA,ENSCAFG00000022264
621	Gry	18	7395925	7730274	334350	0.00742574	0.0826116	1
622	GSl	4	36730899	37064721	333823	0.00773196	0.0826116	2	ENSCAFG00000023483,XM_546192.2
623	GoS	1	36493771	36827268	333498	0.00733496	0.0826116	2	ENSCAFG00000023893,NMBR
624	Rtw	12	41311618	41644315	332698	0.00733496	0.0826116	1
625	Wei	11	5166275	5497416	331142	0.00738916	0.0826116	2	ENSCAFG00000028158,ADAMTS2
626	GSl	7	62287326	62618316	330991	0.00773196	0.0826116	1	ENSCAFG00000026777
627	Dac	21	28927356	29257900	330545	0.00771208	0.0826116	14	FOLR1,C11orf51,LRTOMT,C11orf59,LRRC51,NUMA1,Q3HTU6_CANFA,RNF121,ENSCAFG00000025764,XM_534024.2,ART5,ART1,ENSCAFG00000024527,NUP98
628	GSl	4	37415866	37746367	330502	0.00773196	0.0826116	4	WAPAL,OPN4,LDB3,BMPR1A
629	Gry	18	41739046	42068668	329623	0.00742574	0.0826116	8	SLC43A1,SLC43A3,PRG2,Q64F95_CANFA,SSRP1,TNKS1BP1,XM_540616.1,LRRC55
630	GSl	4	39124355	39447950	323596	0.00773196	0.0826116	11	GRK6,F12,PFN3,SLC34A1,RGS14,LMAN2_CANFA,MXD3,PRELID1,RAB24,NSD1,FGFR4
631	Gry	19	9407591	9729546	321956	0.00742574	0.0826116	1
632	Wei	1	81387515	81708986	321472	0.00738916	0.0826116	4	ENSCAFG00000001469,ENSCAFG00000001470,ENSCAFG00000014649,ENSCAFG00000001475
633	Gry	9	5911404	6232762	321359	0.00742574	0.0826116	10	XM_548671.2,TMEM114,BIRC5_CANFA,AFMID,TK1,XM_846212.1,C17orf99,TMC8,TMC6,ENSCAFG00000005224
634	GSl	13	6237740	6558190	320451	0.00773196	0.0826116	2	GRHL2,NCALD
635	Rtw	26	26084204	26404413	320210	0.00733496	0.0826116	4	MTMR3,ENSCAFG00000022251,HORMAD2,ENSCAFG00000027109
636	Gry	8	4424117	4744321	320205	0.00742574	0.0826116	2	SLC24A4,RIN3
637	Wei	21	4775817	5095371	319555	0.00738916	0.0826116	1	ENSCAFG00000022278
638	GSl	5	63910385	64225008	314624	0.00773196	0.0826116	1	ENSCAFG00000025869
639	GSl	14	23195015	23507568	312554	0.00773196	0.0826116	5	ENSCAFG00000026897,ENSCAFG00000002108,ENSCAFG00000022939,ENSCAFG00000002110,ENSCAFG00000028280
640	Bgl	21	23901429	24213847	312419	0.00767263	0.0826116	6	LOC607573,C11orf67,ENSCAFG00000011455,RSF1,ICLN_CANFA,AQP11
641	LRe	3	53230138	53538925	308788	0.00740741	0.0826116	1
642	BoT	19	20851298	21160083	308786	0.00769231	0.0826116	3	ENSCAFG00000004022,XM_540963.2,ENSCAFG00000004050
643	BoC	10	27745162	28052916	307755	0.00735294	0.0826116	4	MKL1,SGSM3,ADSL,TNRC6B
644	FSp	8	5436616	5742657	306042	0.00763359	0.0826116	14	ENSCAFG00000011090,XM_844591.1,ENSCAFG00000011095,XM_844601.1,ENSCAFG00000025544,TRAC,ENSCAFG00000025461,ENSCAFG00000025403,ENSCAFG00000011096,ENSCAFG00000025361,ENSCAFG00000025359,ENSCAFG00000011119,XM_547719.1,XM_547720.2
645	LRe	8	65464303	65770088	305786	0.00740741	0.0826116	6	UBR7,BTBD7,ENSCAFG00000021074,ENSCAFG00000028390,KIAA1409,ENSCAFG00000027623
646	Rtw	24	5219736	5524041	304306	0.00733496	0.0826116	3	ENSCAFG00000005214,ENSCAFG00000005232,ENSCAFG00000027317
647	Rtw	12	15122617	15426694	304078	0.00733496	0.0826116	2	MRPS18A,VEGFA_CANFA
648	LRe	12	3314967	3618613	303647	0.00740741	0.0826116	18	ABCF1,RPP21,GNL1,ENSCAFG00000028232,XM_538825.2,ENSCAFG00000026551,PPP1R10,MRPS18B,LOC477580,C6orf136,DHX16,KIAA1949,NRM,MDC1,TUBB,FLOT1,IER3,ENSCAFG00000028253
649	BoC	4	55258849	55562025	303177	0.00735294	0.0826116	1	ENSCAFG00000026908
650	BoT	7	24214489	24517449	302961	0.00769231	0.0826116	1	RASAL2
651	BoT	7	59512152	59814896	302745	0.00769231	0.0826116	2	ENSCAFG00000017993,ENSCAFG00000023089
652	NSD	17	34337214	34639853	302640	0.00767263	0.0826116	5	CDKL4,ENSCAFG00000006360,MAP4K3,ENSCAFG00000026261,ENSCAFG00000024456
653	BoT	3	50101305	50403922	302618	0.00769231	0.0826116	2	ENSCAFG00000005166,FAM174B
654	Rtw	29	24947366	25249643	302278	0.00733496	0.0826116	2	ENSCAFG00000025600,STAU2
655	Wei	21	3603803	3904687	300885	0.00738916	0.0826116	2	ARHGAP42,ENSCAFG00000027529
656	Wei	22	22745003	23044830	299828	0.00738916	0.0826116	1
657	Wei	30	7740401	8038496	298096	0.00738916	0.0826116	1	XM_535426.2
658	LRe	X	101638881	101936620	297740	0.00740741	0.0826116	1	ENSCAFG00000007926
659	BoC	X	105582477	105877339	294863	0.00735294	0.0826116	6	ENSCAFG00000018811,ENSCAFG00000018815,ENSCAFG00000023138,ENSCAFG00000023137,ENSCAFG00000023108,OR13H1
660	FSp	3	18151730	18446407	294678	0.00763359	0.0826116	2	FAM172A,ENSCAFG00000028290
661	NFd	17	51731405	52024793	293389	0.00755668	0.0826116	14	CCDC142,MRPL53,MOGS,WBP1,INO80B,RTKN,WDR54,C2orf81,ENSCAFG00000008572,DCTN1,SLC4A5,MTHFD2,MOBKL1B,XM_850028.1
662	BoC	5	37462987	37756314	293328	0.00735294	0.0826116	5	ENSCAFG00000026074,ENSCAFG00000017459,MYH13,MYH8_CANFA,MYH4_CANFA
663	BoC	22	29815184	30108032	292849	0.00735294	0.0826116	4	C13orf37,C13orf34,DIS3,PIBF1
664	CoS	16	25653059	25944958	291900	0.00757576	0.0826116	7	XM_539949.2,FNTA,ENSCAFG00000026073,HOOK3,RNF170,THAP1,CHRNA6
665	Rtw	18	7440753	7730274	289522	0.00733496	0.0826116	1
666	JRT	5	62262473	62551398	288926	0.0074813	0.0826116	1
667	BoC	23	44061028	44349751	288724	0.00735294	0.0826116	1	PLOD2
668	Rtw	1	67712844	68000156	287313	0.00733496	0.0826116	4	HINT3,NCOA7,TRMT11,ENSCAFG00000001059
669	JRT	36	22184914	22472165	287252	0.0074813	0.0826116	2	XP_852254.1,ENSCAFG00000020851
670	BoC	13	6698034	6985203	287170	0.00735294	0.0826116	4	UBE2NL,XM_539108.2,RRM2B,UBR5
671	FSp	26	17716455	18002734	286280	0.00763359	0.0826116	1	SUDS3
672	FSp	3	4776946	5063126	286181	0.00763359	0.0826116	2	ENSCAFG00000023679,ENSCAFG00000007404
673	FSp	18	6465087	6751027	285941	0.00763359	0.0826116	1
674	IrW	3	18151730	18437521	285792	0.00735294	0.0826116	1	FAM172A
675	Rtw	3	18151730	18437521	285792	0.00733496	0.0826116	1	FAM172A
676	JRT	25	8570558	8856088	285531	0.0074813	0.0826116	1	XM_844249.1
677	JRT	3	93878015	94163416	285402	0.0074813	0.0826116	4	ANAPC13,LCORL,NCAPG,DCAF16
678	FSp	18	15061516	15345887	284372	0.00763359	0.0826116	5	ENSCAFG00000003652,ENSCAFG00000025326,PNPLA8,ENSCAFG00000026680,ENSCAFG00000027964
679	IrW	10	38190033	38474301	284269	0.00735294	0.0826116	6	CCDC138,ENSCAFG00000001993,XM_531768.2,ENSCAFG00000026345,XM_848604.1,LIMS1
680	FSp	5	4943609	5227328	283720	0.00763359	0.0826116	1
681	FSp	5	49100246	49383378	283133	0.00763359	0.0826116	1	ROR1
682	FSp	3	57072376	57355000	282625	0.00763359	0.0826116	4	RS17_CANFA,PDE8A,ENSCAFG00000027297,CPEB1
683	JRT	8	73441887	73723818	281932	0.0074813	0.0826116	3	TECPR2,ANKRD9,RCOR1
684	Rtw	13	7915781	8197127	281347	0.00733496	0.0826116	2	ENSCAFG00000024711,RIMS2
685	CoS	20	50378688	50659613	280926	0.00757576	0.0826116	14	Q70ZA7_CANFA,Q70ZF9_CANFA,Q70ZB8_CANFA,ENSCAFG00000016216,OLF4_CANFA,Q70ZL3_CANFA,Q70ZE1_CANFA,Q6W6U9_CANFA,Q6W6U1_CANFA,ENSCAFG00000026208,Q70ZI0_CANFA,Q70ZF0_CANFA,Q70ZI2_CANFA,Q70ZG0_CANFA
686	StP	7	40880937	41161790	280854	0.0075	0.0826116	4	ENSCAFG00000025092,XM_858436.1,CABC1,PSEN2
687	IrW	7	44781267	45061521	280255	0.00735294	0.0826116	11	ARHG2_CANFA,ENSCAFG00000016898,KIAA0907,ENSCAFG00000027646,ENSCAFG00000026285,RIT1,SYT11,XM_547544.2,MSTO1,DAP3,ASH1L
688	StP	13	4011324	4291351	280028	0.0075	0.0826116	2	OSR2,VPS13B
689	JRT	37	9154974	9434353	279380	0.0074813	0.0826116	6	ENSCAFG00000025264,XM_851313.1,ENSCAFG00000025913,GTF3C3,C2orf66,PGAP1
690	IrW	21	35787865	36066861	278997	0.00735294	0.0826116	8	TMEM41B,ENSCAFG00000007241,IPO7,ENSCAFG00000021670,ENSCAFG00000007332,ZNF143,ENSCAFG00000022270,WEE1
691	IrW	9	5141573	5418477	276905	0.00735294	0.0826116	4	ENSCAFG00000026100,ENSCAFG00000005547,ENGASE,C1QTNF1
692	FSp	33	26415672	26691999	276328	0.00763359	0.0826116	4	C3orf15,Q8SQ02_CANFA,GSK3B,ENSCAFG00000017752
693	FSp	5	78915627	79191510	275884	0.00763359	0.0826116	4	FA2H,RFWD3,GLG1,ENSCAFG00000009192
694	Rtw	19	7142010	7417815	275806	0.00733496	0.0826116	1	A2TC22_CANFA
695	IrW	7	8446225	8720594	274370	0.00735294	0.0826116	4	ZBTB41,ASPM_CANFA,F13B,ENSCAFG00000020911
696	FSp	8	5988083	6261979	273897	0.00763359	0.0826116	13	DAD1,ABHD4,ENSCAFG00000011156,OXA1L,ENSCAFG00000011223,SLC7A7,MRPL52,O97657_CANFA,ENSCAFG00000022520,LRP10,REM2,RBM23,PRMT5
697	IrW	29	4184259	4457138	272880	0.00735294	0.0826116	1	ENSCAFG00000027779
698	BeT	15	9444732	9714168	269437	0.00731707	0.0826116	5	C1orf216,PSMB2,NCDN,KIAA0319L,ZMYM4
699	BeT	10	11017208	11286497	269290	0.00731707	0.0826116	1	MSRB3
700	BeT	4	77629804	77898476	268673	0.00731707	0.0826116	1
701	IrW	15	42101388	42369916	268529	0.00735294	0.0826116	5	ENSCAFG00000006734,UHRF1BP1L,ENSCAFG00000023210,ENSCAFG00000006711,ACTR6
702	CoS	36	4780834	5048680	267847	0.00757576	0.0826116	1
703	IrW	9	4845027	5112797	267771	0.00735294	0.0826116	2	CBX2,ENPP7
704	TYo	22	20550903	20818195	267293	0.00744417	0.0826116	1
705	CoS	24	4905950	5172023	266074	0.00757576	0.0826116	2	NKX2-2,XRN2
706	CoS	17	17255796	17521806	266011	0.00757576	0.0826116	1	OSR1
707	CoS	5	82565945	82831659	265715	0.00757576	0.0826116	4	PSMD7,ENSCAFG00000027039,WWP2,cfa-mir-140
708	TYo	9	51321528	51586633	265106	0.00744417	0.0826116	7	CACNA1B,EHMT1,ARRDC1,ZMYND19,WDR85,MRPL41,PNPLA7
709	EBD	X	105777380	106042368	264989	0.0074813	0.0826116	1	XM_549261.2
710	GSh	24	27542431	27806654	264224	0.00744417	0.0826116	12	RBM12,NFS1,ROMO1,RBM39,ENSCAFG00000028218,ENSCAFG00000027513,ENSCAFG00000020899,PHF20,ENSCAFG00000027958,ENSCAFG00000020822,SCAND1,C20orf152
711	GSh	35	3236496	3500198	263703	0.00744417	0.0826116	3	ENSCAFG00000025137,ENSCAFG00000009151,ENSCAFG00000025055
712	GSh	19	14965021	15228649	263629	0.00744417	0.0826116	4	C4orf33,SCLT1,ENSCAFG00000027851,PHF17
713	GSh	19	35448654	35708740	260087	0.00744417	0.0826116	1
714	BrS	9	60352880	60711605	358726	0.00779221	0.0827908	2	PBX3,ENSCAFG00000028003
715	BrS	1	99002980	99351716	348737	0.00779221	0.0827908	2	Q6JDG6_CANFA,DIRAS2
716	BrS	15	49113448	49449962	336515	0.00779221	0.0827908	2	ARHGAP10,Q3HTT9_CANFA
717	BrS	11	35318966	35647715	328750	0.00779221	0.0827908	1	ENSCAFG00000025839
718	GRe	6	39476843	39815984	339142	0.0078534	0.0828632	11	SEC14L5,Q8SPS5_CANFA,UBN1,GLYR1,ROGDI,SEPT12,ZNF500,C16orf71,ANKS3,NUDT16L1,MGRN1
719	GRe	20	56098241	56431839	333599	0.0078534	0.0828632	7	ADAMTS10,ACTL9,cOR2Z4,XM_849356.1,Q2Q419_CANFA,Q2Q422_CANFA,VAV1
720	GRe	32	38517459	38850001	332543	0.0078534	0.0828632	1	ENSCAFG00000012283
721	GRe	13	51211619	51539816	328198	0.0078534	0.0828632	4	ENSCAFG00000002200,ENSCAFG00000027026,KIAA1211,AASDH
722	GRe	13	7915781	8234655	318875	0.0078534	0.0828632	2	ENSCAFG00000024711,RIMS2
723	ShP	10	22321916	22645059	323144	0.00810811	0.0850793	3	TBC1D22A,ENSCAFG00000024522,CERK
724	ShP	18	6465087	6786305	321219	0.00810811	0.0850793	1
725	ShP	6	18646599	18963790	317192	0.00810811	0.0850793	11	UNCX,ZFAND2A,ENSCAFG00000011783,GPER,ENSCAFG00000011778,GPR146,ENSCAFG00000025662,C7orf50,CYP2W1,COX19,ADAP1
726	ShP	3	93897764	94211980	314217	0.00810811	0.0850793	4	ANAPC13,LCORL,NCAPG,DCAF16
727	Dac	34	19334167	19656723	322557	0.0102828	0.0951953	9	ENSCAFG00000026135,ENSCAFG00000028363,ENSCAFG00000026396,ENSCAFG00000027502,KLHL6,ENSCAFG00000027569,ENSCAFG00000027745,ENSCAFG00000011837,KLHL24
728	Dac	36	4709352	5031771	322420	0.0102828	0.0951953	1
729	Gry	15	3760392	4076381	315990	0.00990099	0.0951953	6	CCDC30,XM_843611.1,PPCS,ZMYND12,RIMKLA,FOXJ3
730	GoS	19	8559398	8872405	313008	0.00977995	0.0951953	1
731	Gry	1	61769873	62078325	308453	0.00990099	0.0951953	4	MCM9,ASF1A,ENSCAFG00000027622,FAM184A
732	Bgl	27	47376813	47684425	307613	0.0102302	0.0951953	1	A0ZSX7_CANFA
733	GoS	12	70761511	71068186	306676	0.00977995	0.0951953	4	KIAA1919,REV3L,ENSCAFG00000027455,ENSCAFG00000003960
734	GSl	X	19227436	19532102	304667	0.0103093	0.0951953	5	ENSCAFG00000026393,PRDX4,ACOT9,SAT1,CXorf58
735	GSl	4	82676086	82980255	304170	0.0103093	0.0951953	1	ENSCAFG00000018980
736	GSl	18	8981486	9283973	302488	0.0103093	0.0951953	4	Q6QT04_CANFA,LANCL2,ENSCAFG00000026283,VOPP1
737	Bgl	10	26685677	26986510	300834	0.0102302	0.0951953	13	LOC474484,ENSCAFG00000025759,XRCC6,PPPDE2,PMM1,CSDC2,POLR3H,ACO2,PHF5A,TOB2,ENSCAFG00000028140,TEF,ZC3H7B
738	Gry	22	22745003	23044830	299828	0.00990099	0.0951953	1
739	GoS	X	101638881	101936620	297740	0.00977995	0.0951953	1	ENSCAFG00000007926
740	Bgl	X	105582477	105877339	294863	0.0102302	0.0951953	6	ENSCAFG00000018811,ENSCAFG00000018815,ENSCAFG00000023138,ENSCAFG00000023137,ENSCAFG00000023108,OR13H1
741	GSl	21	43317811	43610668	292858	0.0103093	0.0951953	5	OTOG,MYOD1,NP_001003113.1,SERGEF,ENSCAFG00000028405
742	GSl	21	23837695	24130251	292557	0.0103093	0.0951953	5	LOC607573,ENSCAFG00000004857,C11orf67,ENSCAFG00000011455,RSF1
743	GoS	23	18704619	18995392	290774	0.00977995	0.0951953	3	ZCWPW2,AZI2,CMC1
744	GSl	1	61788004	62078325	290322	0.0103093	0.0951953	4	MCM9,ASF1A,ENSCAFG00000027622,FAM184A
745	GoS	12	30902072	31192027	289956	0.00977995	0.0951953	1	ENSCAFG00000002497
746	LRe	2	52785320	53075220	289901	0.00987654	0.0951953	2	ENSCAFG00000007276,RNF180
747	LRe	32	12523498	12813251	289754	0.00987654	0.0951953	3	ARHGAP24,MAPK10,ENSCAFG00000021443
748	GSl	8	43986311	44275476	289166	0.0103093	0.0951953	3	GPHN,ENSCAFG00000016335,ENSCAFG00000016336
749	LRe	13	57468120	57757055	288936	0.00987654	0.0951953	1
750	Bgl	17	6431934	6720020	288087	0.0102302	0.0951953	1
751	GSl	14	17688785	17976060	287276	0.0103093	0.0951953	1	C7orf62
752	LRe	16	35057023	35344184	287162	0.00987654	0.0951953	1	ENSCAFG00000006380
753	GoS	1	21981158	22268073	286916	0.00977995	0.0951953	4	ENSCAFG00000000133,ENSCAFG00000011517,TXNL1,ENSCAFG00000022106
754	GSl	21	43911231	44197621	286391	0.0103093	0.0951953	6	HPS5,GTF2H1,XM_860260.1,LDHC,XM_542525.2,UEVLD
755	GSl	9	29031665	29317871	286207	0.0103093	0.0951953	5	SPOP,SLC35B1,FAM117A,LOC611269,TAC4
756	GSl	5	5362514	5648607	286094	0.0103093	0.0951953	3	SF3A1,ENSCAFG00000023789,ENSCAFG00000009842
757	BoC	18	45752230	46038034	285805	0.00980392	0.0951953	9	CKAP5,ENSCAFG00000026145,F2,ENSCAFG00000026717,ZNF408,A4GT58_CANFA,KIAA0652,HARBI1,AMBRA1
758	NFd	11	40431947	40717567	285621	0.0100756	0.0951953	1	CNTLN
759	Wei	26	34265318	34550879	285562	0.00985222	0.0951953	2	TOP3B,ENSCAFG00000015511
760	NFd	22	21706142	21991414	285273	0.0100756	0.0951953	2	ENSCAFG00000020868,ENSCAFG00000027188
761	Wei	24	26085291	26370499	285209	0.00985222	0.0951953	6	ENSCAFG00000007487,RALY,ENSCAFG00000021644,EIF2S2,Q2LIQ4_CANFA,ENSCAFG00000024610
762	BoC	22	43757609	44042808	285200	0.00980392	0.0951953	1	ENSCAFG00000021099
763	NFd	2	6083366	6368337	284972	0.0100756	0.0951953	1
764	GSl	6	60175473	60459798	284326	0.0103093	0.0951953	4	TGFBR3,ENSCAFG00000027142,ENSCAFG00000021007,CDC7
765	LRe	3	4309405	4593671	284267	0.00987654	0.0951953	2	WDR36,SLC25A46
766	BoC	1	58922313	59206264	283952	0.00980392	0.0951953	1	SMOC2
767	BoC	14	63141241	63423941	282701	0.00980392	0.0951953	3	CADPS2,ENSCAFG00000027815,RNF133
768	BoT	7	25984536	26266918	282383	0.0102564	0.0951953	4	ENSCAFG00000014246,XM_547452.2,ENSCAFG00000023760,ENSCAFG00000021016
769	LRe	5	4289863	4571811	281949	0.00987654	0.0951953	2	IGSF9B,SPATA19
770	Wei	25	20923206	21204535	281330	0.00985222	0.0951953	3	Q8SPL9_CANFA,ENSCAFG00000007321,ZMYM2
771	GoS	18	7992883	8272802	279920	0.00977995	0.0951953	2	ENSCAFG00000027740,ENSCAFG00000020721
772	NFd	27	30828496	31108106	279611	0.0100756	0.0951953	1	PLEKHA5
773	BoT	14	54016233	54295514	279282	0.0102564	0.0951953	1	IMMP2L
774	NFd	5	60112714	60391081	278368	0.0100756	0.0951953	8	PRKCZ,SKI,MORN1,RER1,PEX10,PLCH2,PANK4,HES5
775	ESt	7	73588306	73865800	277495	0.01	0.0951953	1
776	BoT	1	104421765	104699147	277383	0.0102564	0.0951953	7	ENSCAFG00000021551,ZNF707,XM_848788.1,ENSCAFG00000002476,ZNF582,ENSCAFG00000024243,ZNF667
777	Wei	13	7957327	8234655	277329	0.00985222	0.0951953	1	RIMS2
778	BoC	5	46106356	46383361	277006	0.00980392	0.0951953	4	SERBP1,NP_001020570.1,IL23R,ENSCAFG00000028444
779	BoC	4	14816850	15093774	276925	0.00980392	0.0951953	1	SLC16A9
780	NFd	15	42201586	42478062	276477	0.0100756	0.0951953	7	ENSCAFG00000006734,UHRF1BP1L,ENSCAFG00000023210,ENSCAFG00000006711,ACTR6,SCYL2,SLC17A8
781	BoC	33	26415672	26691999	276328	0.00980392	0.0951953	4	C3orf15,Q8SQ02_CANFA,GSK3B,ENSCAFG00000017752
782	NFd	27	6951351	7225577	274227	0.0100756	0.0951953	2	ATF1,DIP2B
783	Wei	4	20403326	20677229	273904	0.00985222	0.0951953	1	XM_844561.1
784	NFd	5	32998418	33271775	273358	0.0100756	0.0951953	3	ZZEF1,CYB5D2,ANKFY1
785	Sci	11	6010076	6283243	273168	0.00992556	0.0951953	1
786	Sci	17	33746750	34019870	273121	0.00992556	0.0951953	7	XM_532938.2,GALM,SFRS7,ENSCAFG00000006297,GEMIN6,DHX57,MORN2
787	FSp	7	37351557	37623198	271642	0.0101781	0.0951953	2	SDCCAG8,Q6PVW1_CANFA
788	GoS	5	58761977	59033520	271544	0.00977995	0.0951953	5	SLC1A7,PODN,ECHDC2,ENSCAFG00000023354,ZYG11A
789	GoS	30	33287103	33557926	270824	0.00977995	0.0951953	1	MEGF11
790	Rtw	15	8238785	8508899	270115	0.00977995	0.0951953	1	GRIK3
791	BoC	15	42101388	42369916	268529	0.00980392	0.0951953	5	ENSCAFG00000006734,UHRF1BP1L,ENSCAFG00000023210,ENSCAFG00000006711,ACTR6
792	BoC	19	20808131	21076007	267877	0.00980392	0.0951953	4	ADAD1,ENSCAFG00000004022,XM_540963.2,ENSCAFG00000004050
793	JRT	20	35974167	36241203	267037	0.00997506	0.0951953	6	DNAH12,ENSCAFG00000007930,ASB14,APPL1,ENSCAFG00000007972,HESX1
794	Rtw	12	7432051	7697625	265575	0.00977995	0.0951953	8	ZNF76,DEF6,PPARD_CANFA,FANCE,ENSCAFG00000001318,TEAD3,TULP1,XM_859221.1
795	JRT	8	51128551	51393848	265298	0.00997506	0.0951953	9	EIF2B2,MLH3,ACYP1,FAM164C,NEK9,TMED10,XM_547913.2,FOS,ENSCAFG00000026193
796	CoS	16	7732521	7997352	264832	0.010101	0.0951953	1
797	BoC	22	12857251	13122042	264792	0.00980392	0.0951953	2	ENSCAFG00000024875,OLFM4
798	NFd	2	55857594	56121453	263860	0.0100756	0.0951953	1
799	NFd	1	96769118	97032950	263833	0.0100756	0.0951953	4	ENSCAFG00000025949,KIAA1432,ENSCAFG00000028315,ERMP1
800	IrW	35	3236496	3500198	263703	0.00980392	0.0951953	3	ENSCAFG00000025137,ENSCAFG00000009151,ENSCAFG00000025055
801	NFd	1	64938157	65201836	263680	0.0100756	0.0951953	3	PKIB,FABP7,SMPDL3A
802	CoS	31	11468697	11731699	263003	0.010101	0.0951953	1	XM_544814.2
803	JRT	7	6907053	7170029	262977	0.00997506	0.0951953	3	cfa-mir-181a-1,cfa-mir-181b-1,PTPRC
804	BoC	10	28193737	28455265	261529	0.00980392	0.0951953	4	GRAP2,ENSCAFG00000001302,ENTHD1,CACNA1I
805	CoS	17	16015228	16276354	261127	0.010101	0.0951953	5	VSNL1,SMC6,ENSCAFG00000003742,GEN1,MSGN1
806	JRT	21	49429750	49690576	260827	0.00997506	0.0951953	1	ENSCAFG00000021658
807	BoC	36	4062816	4323300	260485	0.00980392	0.0951953	1
808	TYo	5	9271502	9531655	260154	0.00992556	0.0951953	1	ENSCAFG00000020916
809	BoC	6	58449338	58709236	259899	0.00980392	0.0951953	2	BCAR3,FNBP1L
810	BoC	22	12511354	12771218	259865	0.00980392	0.0951953	4	WBP4,ELF1,SUGT1,LECT1
811	CoS	5	81740735	82000595	259861	0.010101	0.0951953	1
812	JRT	9	46673812	46932981	259170	0.00997506	0.0951953	5	A2IBY9_CANFA,NUFIP2,ENSCAFG00000015409,ENSCAFG00000022934,TAOK1
813	Dob	20	38300677	38559676	259000	0.00970874	0.0951953	1	CACNA2D3
814	BoC	20	15146854	15405532	258679	0.00980392	0.0951953	1	ENSCAFG00000005604
815	JRT	27	7180285	7436137	255853	0.00997506	0.0951953	3	DIP2B,LARP4,ENSCAFG00000025386
816	BoC	3	83520091	83775932	255842	0.00980392	0.0951953	2	ENSCAFG00000027541,ENSCAFG00000026467
817	JRT	14	45916469	46169001	252533	0.00997506	0.0951953	2	ENSCAFG00000028192,NOD1
818	BoC	5	60140618	60391081	250464	0.00980392	0.0951953	7	SKI,MORN1,RER1,PEX10,PLCH2,PANK4,HES5
819	BoC	17	25640006	25889708	249703	0.00980392	0.0951953	4	PLB1,PP1B_CANFA,TRMT61B,WDR43
820	BoC	14	16737601	16986373	248773	0.00980392	0.0951953	4	RUNDC3B,SLC25A40,DBF4,ENSCAFG00000024862
821	BoC	22	47403060	47650431	247372	0.00980392	0.0951953	1	ENSCAFG00000005319
822	BoC	16	12626664	12873886	247223	0.00980392	0.0951953	4	ZC3HAV1L,KIAA1549,TMEM213,ATP6V0A4
823	BoC	12	50360010	50606253	246244	0.00980392	0.0951953	2	SPACA1,Q9BFC5_CANFA
824	BoC	11	21976857	22220226	243370	0.00980392	0.0951953	1
825	BoC	8	7879559	8122511	242953	0.00980392	0.0951953	1
826	GRe	18	50908488	51203185	294698	0.0104712	0.0964566	6	ENSCAFG00000010462,CTTN,PPFIA1,ENSCAFG00000025042,FADD,ANO1
827	GRe	8	65525933	65817779	291847	0.0104712	0.0964566	5	BTBD7,ENSCAFG00000021074,ENSCAFG00000028390,KIAA1409,ENSCAFG00000027623
828	BrS	21	3603803	3924349	320547	0.012987	0.106957	2	ARHGAP42,ENSCAFG00000027529
829	Dac	2	25660812	25975450	314639	0.0128535	0.106957	3	FRMD4A,PRPF18,BEND7
830	Dac	28	13165702	13478480	312779	0.0128535	0.106957	4	LCOR,ENSCAFG00000008908,ENSCAFG00000020736,Q59I58_CANFA
831	Dac	27	16020061	16331451	311391	0.0128535	0.106957	10	ENSCAFG00000022080,XM_543733.2,ENSCAFG00000025338,ENSCAFG00000025337,MUCSM_CANFA,ENSCAFG00000025315,ENSCAFG00000025309,ENSCAFG00000025302,MUC19,LRRK2
832	BrS	5	5141847	5451580	309734	0.012987	0.106957	2	SF3A1,ENSCAFG00000023789
833	BrS	14	27365903	27675435	309533	0.012987	0.106957	1
834	Dac	1	66491228	66800641	309414	0.0128535	0.106957	1	NKAIN2
835	BrS	5	41551076	41859667	308592	0.012987	0.106957	3	XM_848963.1,XM_845890.1,PMP22
836	BrS	31	6247495	6555822	308328	0.012987	0.106957	1
837	BrS	22	5504641	5810005	305365	0.012987	0.106957	1	FNDC3A
838	Dac	3	75803421	76108602	305182	0.0128535	0.106957	7	LIAS,RPL9,KLB,RFC1,ENSCAFG00000026870,WDR19,KLHL5
839	Dac	23	29014923	29317468	302546	0.0128535	0.106957	2	ENSCAFG00000023900,DAZL
840	BrS	8	25843783	26144892	301110	0.012987	0.106957	1	ENSCAFG00000026412
841	Dac	22	44964493	45265084	300592	0.0128535	0.106957	1
842	Dac	17	6692776	6993270	300495	0.0128535	0.106957	1
843	BrS	10	11169956	11470246	300291	0.012987	0.106957	1	ENSCAFG00000022943
844	BrS	11	21323724	21622125	298402	0.012987	0.106957	2	ADAMTS19,ENSCAFG00000000723
845	BrS	15	53164028	53462364	298337	0.012987	0.106957	3	FBXW7,ENSCAFG00000021451,ENSCAFG00000008160
846	BrS	X	105582477	105877339	294863	0.012987	0.106957	6	ENSCAFG00000018811,ENSCAFG00000018815,ENSCAFG00000023138,ENSCAFG00000023137,ENSCAFG00000023108,OR13H1
847	BrS	2	5798687	6087458	288772	0.012987	0.106957	1
848	Bgl	5	5960485	6247457	286973	0.0127877	0.106957	1
849	Eur	18	6465087	6751027	285941	0.012987	0.106957	1
850	Bgl	3	18151730	18437521	285792	0.0127877	0.106957	1	FAM172A
851	NSD	6	37407903	37693653	285751	0.0127877	0.106957	1	ENSCAFG00000019082
852	Eur	20	59721353	60006835	285483	0.012987	0.106957	14	GNG7,GADD45B,LMNB2,TMPRSS9,XM_542189.2,LSM7,LINGO3,C19orf35,OAZ1,ENSCAFG00000028282,JSRP1,AMH,SF3A2,DOT1L
853	BrS	9	62850710	63136182	285473	0.012987	0.106957	4	STRBP,RABGAP1,ENSCAFG00000026021,ENSCAFG00000023332
854	BrS	20	5799187	6084656	285470	0.012987	0.106957	8	H1FX,C3orf37,COPG,CNBP,ISY1,ENSCAFG00000024835,GP9,ENSCAFG00000004343
855	Eur	36	12589619	12874287	284669	0.012987	0.106957	2	ENSCAFG00000027931,GRB14
856	NSD	5	42892497	43176690	284194	0.0127877	0.106957	4	AA2BR_CANFA,ENSCAFG00000026904,ENSCAFG00000026219,CYTSB
857	Eur	13	11920014	12204152	284139	0.012987	0.106957	3	EIF3E,ENSCAFG00000000705,XM_847922.1
858	NSD	4	67928561	68210722	282162	0.0127877	0.106957	2	ENSCAFG00000023014,XM_850162.1
859	Bgl	5	4289863	4571811	281949	0.0127877	0.106957	2	IGSF9B,SPATA19
860	LRe	34	19376470	19656723	280254	0.0123457	0.106957	9	ENSCAFG00000026135,ENSCAFG00000028363,ENSCAFG00000026396,ENSCAFG00000027502,KLHL6,ENSCAFG00000027569,ENSCAFG00000027745,ENSCAFG00000011837,KLHL24
861	Gry	12	5650898	5931001	280104	0.0123762	0.106957	21	Q5TJG2_CANFA,RXRB_CANFA,S39A7_CANFA,DHB8_CANFA,cfa-mir-219-1,RING1_CANFA,VPS52_CANFA,RS18_CANFA,ENSCAFG00000000952,WDR46_CANFA,PFD6_CANFA,RGL2_CANFA,TPSN_CANFA,ZBT22_CANFA,DAXX_CANFA,KIFC1,PHF1,CUTA,SYNGAP1,ZBTB9,ENSCAFG00000013082
862	Bgl	17	64279921	64559429	279509	0.0127877	0.106957	3	FLG,FLG2,CRNN
863	Gry	13	6418765	6698034	279270	0.0123762	0.106957	1	NCALD
864	Bgl	21	5294038	5572308	278271	0.0127877	0.106957	1	ENSCAFG00000025627
865	Bgl	27	45355468	45632786	277319	0.0127877	0.106957	4	SLC6A13,KDM5A,CCDC77,B4GALNT3
866	BrS	1	23974550	24251679	277130	0.012987	0.106957	4	C18orf54,ENSCAFG00000024276,STARD6,POLI
867	Bgl	9	5141573	5418477	276905	0.0127877	0.106957	4	ENSCAFG00000026100,ENSCAFG00000005547,ENGASE,C1QTNF1
868	NSD	2	38159653	38436552	276900	0.0127877	0.106957	6	PURA,C5orf32,ENSCAFG00000005736,XM_547780.2,HBEGF,SLC4A9
869	Bgl	27	46298497	46574933	276437	0.0127877	0.106957	2	ENSCAFG00000015874,ENSCAFG00000025245
870	LRe	2	50133374	50408615	275242	0.0123457	0.106957	3	DEPDC1B,ELOVL7,ERCC8
871	BrS	36	3704216	3979122	274907	0.012987	0.106957	2	ENSCAFG00000025972,GALNT13
872	BrS	13	50533428	50808009	274582	0.012987	0.106957	4	ENSCAFG00000002090,TMEM165,CLOCK,PDCL2
873	Elk	31	4824851	5099146	274296	0.0122549	0.106957	1	CADM2
874	Gry	16	9328749	9602938	274190	0.0123762	0.106957	11	CLCN1_CANFA,CASP2,TMEM139,XM_532742.2,Q2ABD0_CANFA,Q2ABD1_CANFA,PIP,ENSCAFG00000003650,OR6V1,OR9A2,KEL
875	NSD	25	44179368	44452308	272941	0.0127877	0.106957	1	PID1
876	BoT	2	64819745	65091541	271797	0.0128205	0.106957	2	FTO,RPGRIP1L
877	Sci	8	37233202	37503866	270665	0.0124069	0.106957	2	ENSCAFG00000021858,DAAM1
878	FSp	5	53636271	53906797	270527	0.0127226	0.106957	1
879	ESt	15	8238785	8508899	270115	0.0125	0.106957	1	GRIK3
880	ESt	14	5914326	6183106	268781	0.0125	0.106957	3	AKR1B1,SLC35B4,LRGUK
881	Sci	17	52358502	52626832	268331	0.0124069	0.106957	4	NAT8,ENSCAFG00000024025,XM_533005.2,ENSCAFG00000008835
882	BoT	4	37478501	37746367	267867	0.0128205	0.106957	4	WAPAL,OPN4,LDB3,BMPR1A
883	FSp	22	10777631	11045318	267688	0.0127226	0.106957	2	EPSTI1,C13orf30
884	GoS	34	43535562	43802634	267073	0.0122249	0.106957	2	TBL1XR1,ENSCAFG00000026781
885	GoS	11	47806096	48073094	266999	0.0122249	0.106957	1	ENSCAFG00000028361
886	BoT	8	38822332	39087832	265501	0.0128205	0.106957	5	MNAT1,ENSCAFG00000021082,ENSCAFG00000015644,TRMT5,SLC38A6
887	ESt	7	28606142	28871221	265080	0.0125	0.106957	3	SLC9A11,PRDX6,TNFSF4
888	Elk	27	7323893	7588621	264729	0.0122549	0.106957	3	ENSCAFG00000025386,LIMA1,LASS5
889	Sci	11	16728018	16992660	264643	0.0124069	0.106957	1
890	ESt	35	3236496	3500198	263703	0.0125	0.106957	3	ENSCAFG00000025137,ENSCAFG00000009151,ENSCAFG00000025055
891	GoS	17	55583903	55846984	263082	0.0122249	0.106957	5	XM_843595.1,SYCP1,ENSCAFG00000009712,TSHB_CANFA,TSPAN2
892	EBD	1	88016139	88278998	262860	0.0124688	0.106957	2	ALDH1A1,TMC1
893	Elk	31	29011918	29274554	262637	0.0122549	0.106957	1	TIAM1
894	ESt	28	11167230	11429815	262586	0.0125	0.106957	1	PLCE1
895	Elk	10	10907439	11169956	262518	0.0122549	0.106957	2	MSRB3,ENSCAFG00000027222
896	Elk	2	71040539	71302382	261844	0.0122549	0.106957	7	ZNF362,TRIM62,ADC,ENSCAFG00000021211,AK2,ENSCAFG00000022512,RNF19B
897	NFd	11	16276040	16537019	260980	0.0125945	0.106957	1	CSNK1G3
898	GoS	1	96473478	96734413	260936	0.0122249	0.106957	6	JAK2,INSL6,RELX_CANFA,LOC609677,CD274,PDCD1LG2
899	BMD	3	43079314	43340039	260726	0.0120773	0.106957	3	XM_533248.2,ASB7,LINS1
900	BMD	14	17994008	18254224	260217	0.0120773	0.106957	2	ENSCAFG00000001860,ZNF804B
901	BMD	13	40965355	41225442	260088	0.0120773	0.106957	10	RECQL4,LRRC14,LRRC24,ARHGAP39,COMMD5,ZNF7,ENSCAFG00000024976,RPL8,ENSCAFG00000001679,ZN252_CANFA
902	GoS	8	34365128	34624939	259812	0.0122249	0.106957	3	ENSCAFG00000015062,KTN1,XP_853729.1
903	GoS	28	17385901	17645227	259327	0.0122249	0.106957	7	MGEA5,Q7JGZ5_CANFA,ENSCAFG00000028383,ENSCAFG00000021209,C10orf76,RPL37A,HPS6
904	BMD	13	41986813	42245605	258793	0.0120773	0.106957	3	TMEM33,SLC30A9,BEND4
905	TYo	20	15146854	15405532	258679	0.0124069	0.106957	1	ENSCAFG00000005604
906	Elk	17	14312367	14570722	258356	0.0122549	0.106957	3	NBAS,DDX1,XM_540089.2
907	TYo	3	38945183	39202443	257261	0.0124069	0.106957	1	NDN
908	NFd	X	71984983	72242099	257117	0.0125945	0.106957	1
909	NFd	4	82705831	82961885	256055	0.0125945	0.106957	1
910	NFd	37	33179989	33434217	254229	0.0125945	0.106957	1
911	NFd	25	24992029	25245712	253684	0.0125945	0.106957	2	ENSCAFG00000007763,ENSCAFG00000027322
912	NFd	17	56707211	56960774	253564	0.0125945	0.106957	2	ENSCAFG00000009787,AT1A1_CANFA
913	Dob	6	4683329	4936366	253038	0.0121359	0.106957	1	XM_546907.2
914	JRT	32	30142372	30394192	251821	0.0124688	0.106957	1	ENSCAFG00000011074
915	NFd	32	15026690	15276303	249614	0.0125945	0.106957	1	ENSCAFG00000009843
916	JRT	16	8864019	9111474	247456	0.0124688	0.106957	9	OR6B1,XM_845733.1,Q70ZB3_CANFA,XM_539842.2,OLF3_CANFA,XM_539844.2,ENSCAFG00000003523,FAM115A,FAM115C
917	JRT	1	99368256	99615345	247090	0.0124688	0.106957	2	ENSCAFG00000026974,ENSCAFG00000002173
918	JRT	13	10801155	11047731	246577	0.0124688	0.106957	2	ENSCAFG00000000684,XM_844664.1
919	JRT	13	14223345	14467359	244015	0.0124688	0.106957	1
920	NFd	11	42700578	42944081	243504	0.0125945	0.106957	1	ENSCAFG00000026513
921	JRT	1	56168066	56410740	242675	0.0124688	0.106957	1
922	BoC	12	62216729	62457186	240458	0.0122549	0.106957	1
923	BoC	31	6292179	6532110	239932	0.0122549	0.106957	1
924	BoC	23	29857489	30096850	239362	0.0122549	0.106957	2	ANKRD28,BTD
925	BoC	3	75869864	76108602	238739	0.0122549	0.106957	4	RFC1,ENSCAFG00000026870,WDR19,KLHL5
926	GRe	25	11977687	12260095	282409	0.013089	0.107448	4	HSPH1,ENSCAFG00000006567,C13orf26,C13orf33
927	GRe	22	11461402	11742165	280764	0.013089	0.107448	1	DGKH
928	GRe	34	19376470	19656723	280254	0.013089	0.107448	9	ENSCAFG00000026135,ENSCAFG00000028363,ENSCAFG00000026396,ENSCAFG00000027502,KLHL6,ENSCAFG00000027569,ENSCAFG00000027745,ENSCAFG00000011837,KLHL24
929	ShP	5	43142761	43452070	309310	0.0135135	0.110576	2	AKAP10,ULK2
930	ShP	X	81851754	82157585	305832	0.0135135	0.110576	1
931	ShP	5	5291944	5583551	291608	0.0135135	0.110576	3	SF3A1,ENSCAFG00000023789,ENSCAFG00000009842
932	LRe	15	53164028	53436485	272458	0.0148148	0.116089	3	FBXW7,ENSCAFG00000021451,ENSCAFG00000008160
933	LRe	17	44879535	45147130	267596	0.0148148	0.116089	1	ENSCAFG00000028012
934	LRe	1	50164076	50430161	266086	0.0148148	0.116089	4	ENSCAFG00000000618,ENSCAFG00000028358,ENSCAFG00000000624,XM_849896.1
935	LRe	11	54918685	55183954	265270	0.0148148	0.116089	6	UNC13B,ENSCAFG00000002045,ENSCAFG00000018740,ENSCAFG00000026880,RUSC2,FAM166B
936	Gry	10	27787936	28052916	264981	0.0148515	0.116089	4	MKL1,SGSM3,ADSL,TNRC6B
937	Sci	18	11904525	12168241	263717	0.0148883	0.116089	2	ENSCAFG00000003551,ENSCAFG00000003552
938	Sci	8	43986311	44248190	261880	0.0148883	0.116089	2	GPHN,ENSCAFG00000016335
939	Sci	10	9117729	9377816	260088	0.0148883	0.116089	1	AVPR1A
940	BeT	15	47241998	47501605	259608	0.0146341	0.116089	2	MMAA,ZNF827
941	BeT	7	28709098	28968623	259526	0.0146341	0.116089	2	TNFSF4,TNFSF18
942	Sci	34	30919361	31178613	259253	0.0148883	0.116089	1	ENSCAFG00000024558
943	BeT	21	4775817	5034632	258816	0.0146341	0.116089	1	ENSCAFG00000022278
944	Sci	10	12558537	12815982	257446	0.0148883	0.116089	1	CAND1
945	Elk	7	59512152	59769003	256852	0.0147059	0.116089	2	ENSCAFG00000017993,ENSCAFG00000023089
946	Elk	1	31251354	31506327	254974	0.0147059	0.116089	1	ENSCAFG00000000237
947	Rtw	10	64406684	64660895	254212	0.0146699	0.116089	3	USP34,ENSCAFG00000027539,ENSCAFG00000020886
948	GoS	2	56005621	56259640	254020	0.0146699	0.116089	1
949	GSh	19	16453621	16707485	253865	0.0148883	0.116089	2	ENSCAFG00000005164,ENSCAFG00000022475
950	GoS	13	6873170	7127019	253850	0.0146699	0.116089	3	UBR5,ENSCAFG00000000632,ENSCAFG00000000634
951	Sci	27	26247587	26501055	253469	0.0148883	0.116089	1
952	TYo	37	3576887	3830321	253435	0.0148883	0.116089	2	PMS1,GDF8_CANFA
953	Rtw	19	7525880	7778424	252545	0.0146699	0.116089	1
954	GSh	4	16176961	16428886	251926	0.0148883	0.116089	3	CDK1,RHOBTB1,ENSCAFG00000020717
955	Elk	3	8525501	8777165	251665	0.0147059	0.116089	1
956	TYo	35	28995437	29246492	251056	0.0148883	0.116089	8	ENSCAFG00000012078,ENSCAFG00000024971,RAN,OR2W1,ENSCAFG00000024405,OR10C1,ENSCAFG00000012142,GABBR1
957	Sci	8	56294123	56544261	250139	0.0148883	0.116089	1	TSHR_CANFA
958	GoS	1	11209162	11457684	248523	0.0146699	0.116089	3	Q6JDH2_CANFA,CD226,DOK6
959	Elk	7	63441357	63689718	248362	0.0147059	0.116089	1
960	Rtw	15	43924220	44171614	247395	0.0146699	0.116089	5	CCDC53,NUP37,ENSCAFG00000027023,C12orf48,MCH_CANFA
961	GoS	37	9186994	9434353	247360	0.0146699	0.116089	6	ENSCAFG00000025264,XM_851313.1,ENSCAFG00000025913,GTF3C3,C2orf66,PGAP1
962	Elk	1	64440172	64686603	246432	0.0147059	0.116089	1	ENSCAFG00000028093
963	Sci	22	19701356	19947690	246335	0.0148883	0.116089	2	ENSCAFG00000006066,ENSCAFG00000026813
964	Sci	14	47794772	48038654	243883	0.0148883	0.116089	5	AVL9,KBTBD2,ENSCAFG00000003158,FKBP9,NT5C3
965	Sci	11	40632694	40876201	243508	0.0148883	0.116089	1	ENSCAFG00000001567
966	Elk	18	27128953	27371867	242915	0.0147059	0.116089	2	SEMA3D,ENSCAFG00000027671
967	Dob	13	6094486	6337263	242778	0.0145631	0.116089	1	GRHL2
968	Dob	26	11587817	11829883	242067	0.0145631	0.116089	4	NP_001003069.1,CCDC63,ENSCAFG00000008529,CUX2
969	TYo	9	33121838	33363319	241482	0.0148883	0.116089	2	ENSCAFG00000027973,TOM1L1
970	Dob	3	61722723	61963797	241075	0.0145631	0.116089	5	KIAA0232,TBC1D14,CCDC96,TADA2B,GRPEL1
971	TYo	3	44099822	44340149	240328	0.0148883	0.116089	1	LRRC28
972	Elk	24	7355498	7595781	240284	0.0147059	0.116089	3	C20orf79,DTD1,ENSCAFG00000010138
973	TYo	3	43845408	44085302	239895	0.0148883	0.116089	2	LYSMD4,MEF2A
974	TYo	4	55307714	55545058	237345	0.0148883	0.116089	1	ENSCAFG00000026908
975	TYo	3	3069417	3304950	235534	0.0148883	0.116089	2	REEP5,APC
976	TYo	16	31856761	32091054	234294	0.0148883	0.116089	1
977	TYo	34	24667860	24901540	233681	0.0148883	0.116089	1	TP63
978	StP	23	8786268	9053270	267003	0.015	0.116365	2	ENSCAFG00000004753,cfa-mir-128-2
979	StP	13	18038511	18304264	265754	0.015	0.116365	1	TRPS1
980	StP	11	54918685	55183954	265270	0.015	0.116365	6	UNC13B,ENSCAFG00000002045,ENSCAFG00000018740,ENSCAFG00000026880,RUSC2,FAM166B
981	StP	14	21092377	21357166	264790	0.015	0.116365	2	XM_539420.2,CDK6
982	ESt	21	24998750	25261084	262335	0.015	0.116365	3	XM_542297.2,LRRC32,C11orf30
983	NSD	22	45529198	45797754	268557	0.0153453	0.11868	1	GPC5
984	Bgl	11	45860080	46126703	266624	0.0153453	0.11868	2	ENSCAFG00000021101,HMGN1
985	Bgl	30	7772008	8038496	266489	0.0153453	0.11868	1	XM_535426.2
986	Dac	16	9295270	9594838	299569	0.0154242	0.118688	12	ZYX,FAM131B,CLCN1_CANFA,CASP2,TMEM139,XM_532742.2,Q2ABD0_CANFA,Q2ABD1_CANFA,PIP,ENSCAFG00000003650,OR6V1,OR9A2
987	Dac	14	24182037	24478247	296211	0.0154242	0.118688	3	DYNC1I1,ENSCAFG00000020789,SLC25A13
988	Dac	1	27063165	27353247	290083	0.0154242	0.118688	3	ME2,MRO,ENSCAFG00000020845
989	Dac	3	18571735	18860517	288783	0.0154242	0.118688	2	NR2F1,ENSCAFG00000008096
990	BoT	35	3236496	3500198	263703	0.0153846	0.118688	3	ENSCAFG00000025137,ENSCAFG00000009151,ENSCAFG00000025055
991	GSl	25	4065978	4337127	271150	0.0154639	0.118754	1	ENSCAFG00000005968
992	GSl	5	32367525	32632285	264761	0.0154639	0.118754	4	YAP1,ENSCAFG00000026038,C11orf70,KIAA1377
993	Eur	30	35038526	35322380	283855	0.0155844	0.119319	5	PIAS1,CALML4,CLN6_CANFA,FEM1B,ENSCAFG00000017482
994	Eur	30	27821162	28104956	283795	0.0155844	0.119319	1
995	Eur	16	13882255	14164253	281999	0.0155844	0.119319	1	DGKI
996	GRe	19	15460480	15733030	272551	0.0157068	0.120135	1	PGRMC2
997	Wei	7	39895216	40160416	265201	0.0172414	0.128415	2	ENSCAFG00000027201,SMYD3
998	LRe	31	6292179	6555822	263644	0.017284	0.128415	1
999	StP	37	23521118	23784215	263098	0.0175	0.128415	2	IKZF2,ENSCAFG00000014255
1000	Gry	X	17150477	17412253	261777	0.0173267	0.128415	1	CNKSR2
1001	ESt	27	16072021	16331451	259431	0.0175	0.128415	9	XM_543733.2,ENSCAFG00000025338,ENSCAFG00000025337,MUCSM_CANFA,ENSCAFG00000025315,ENSCAFG00000025309,ENSCAFG00000025302,MUC19,LRRK2
1002	EBD	13	6777361	7035021	257661	0.0174564	0.128415	2	RRM2B,UBR5
1003	BeT	14	10568305	10825917	257613	0.0170732	0.128415	7	TNPO3,IRF5,ENSCAFG00000001616,ENSCAFG00000001620,FLNC,CCDC136,OPN1SW
1004	BMD	1	94299745	94557096	257352	0.0169082	0.128415	4	Q6H100_CANFA,KCNV2,KIAA0020,ENSCAFG00000002042
1005	ESt	14	6623125	6880415	257291	0.0175	0.128415	1	ENSCAFG00000025266
1006	IrW	20	15171977	15429136	257160	0.0171569	0.128415	1	ENSCAFG00000005604
1007	BMD	5	4314822	4571811	256990	0.0169082	0.128415	1	SPATA19
1008	BeT	15	9944996	10201726	256731	0.0170732	0.128415	8	DLGAP3,ENSCAFG00000003603,GJA4,GJB3,GJB4,,ZMYM1,ZMYM6
1009	BMD	3	53260264	53516242	255979	0.0169082	0.128415	1
1010	ESt	16	7683902	7937375	253474	0.0175	0.128415	1
1011	BeT	16	7683902	7937375	253474	0.0170732	0.128415	1
1012	BMD	X	17931881	18184502	252622	0.0169082	0.128415	2	PHEX,ENSCAFG00000020923
1013	ESt	20	7372780	7625133	252354	0.0175	0.128415	2	SC6A6_CANFA,ENSCAFG00000004492
1014	IrW	22	53134684	53385652	250969	0.0171569	0.128415	5	PCCA,ENSCAFG00000023761,ENSCAFG00000005851,A2LD1,HNRPDL
1015	BMD	3	56602528	56851954	249427	0.0169082	0.128415	7	IQGAP1,ZNF774,ZSCAN2,ENSCAFG00000023242,WDR73,NMB,SC11A_CANFA
1016	ESt	7	71183040	71432415	249376	0.0175	0.128415	2	ENSCAFG00000026470,ENSCAFG00000018377
1017	ESt	13	6449787	6698034	248248	0.0175	0.128415	1	NCALD
1018	ESt	1	103988199	104236253	248055	0.0175	0.128415	3	ZIM2,ENSCAFG00000023268,ENSCAFG00000002441
1019	ESt	22	11494253	11742165	247913	0.0175	0.128415	1	DGKH
1020	GSh	7	38637905	38885779	247875	0.0173697	0.128415	3	C1orf101,PPPDE1,HNRNPU
1021	GoS	X	101161395	101407710	246316	0.0171149	0.128415	1	ENSCAFG00000015018
1022	ESt	6	37448483	37693653	245171	0.0175	0.128415	1
1023	ESt	X	109680647	109924950	244304	0.0175	0.128415	5	MAP7D3,GPR112,ENSCAFG00000018941,BRS3,HTATSF1
1024	GoS	35	8990143	9234148	244006	0.0171149	0.128415	2	NRN1,F13A1
1025	ESt	29	32064666	32308598	243933	0.0175	0.128415	2	ENSCAFG00000026877,RPL23
1026	BMD	17	19912579	20156037	243459	0.0169082	0.128415	1
1027	ESt	13	6094486	6337263	242778	0.0175	0.128415	1	GRHL2
1028	NFd	10	30328432	30568894	240463	0.0176322	0.128415	11	CYTH4,ENSCAFG00000001508,cfa-mir-1835,ENSCAFG00000001509,C1QTNF6,Q6UA82_CANFA,TMPRSS6,KCTD17,MPST,TST,C22orf33
1029	NFd	17	21885783	22126211	240429	0.0176322	0.128415	3	NCOA1,C2orf79,CENPO
1030	NFd	12	34640898	34880965	240068	0.0176322	0.128415	2	ENSCAFG00000002537,ENSCAFG00000026030
1031	JRT	1	19062523	19302352	239830	0.0174564	0.128415	2	Q4JIV8_CANFA,ENSCAFG00000028239
1032	Dob	16	24583557	24823180	239624	0.0169903	0.128415	1	ENSCAFG00000005301
1033	ESt	20	18416322	18655740	239419	0.0175	0.128415	1
1034	NFd	10	63863630	64102544	238915	0.0176322	0.128415	2	ENSCAFG00000002958,PAPOLG
1035	Rtw	7	24278702	24517449	238748	0.0171149	0.128415	1	RASAL2
1036	NFd	5	41146472	41385129	238658	0.0176322	0.128415	1	ENSCAFG00000027209
1037	NFd	19	15370444	15609090	238647	0.0176322	0.128415	1
1038	NFd	6	26787207	27025761	238555	0.0176322	0.128415	3	XM_536943.2,ENSCAFG00000024044,XM_547099.2
1039	NFd	11	55940453	56178951	238499	0.0176322	0.128415	2	MELK,ENSCAFG00000027260
1040	BoC	8	30612724	30851006	238283	0.0171569	0.128415	1	ENSCAFG00000028167
1041	NFd	22	27605714	27843887	238174	0.0176322	0.128415	1
1042	NFd	1	41887890	42125303	237414	0.0176322	0.128415	1
1043	BoC	18	8005885	8242637	236753	0.0171569	0.128415	1	ENSCAFG00000027740
1044	BoC	6	10171062	10407672	236611	0.0171569	0.128415	6	CCL24_CANFA,RHBDD2,Q2EFX8_CANFA,ENSCAFG00000013483,STYXL1,Q0QF34_CANFA
1045	Rtw	11	45785355	46020241	234887	0.0171149	0.128415	1	ENSCAFG00000021101
1046	TYo	6	7957181	8188256	231076	0.0173697	0.128415	1
1047	FSp	X	17150477	17412253	261777	0.0178117	0.129475	1	CNKSR2
1048	FSp	7	41437488	41698739	261252	0.0178117	0.129475	5	PARP1,ENSCAFG00000021691,LIN9,ENSCAFG00000016113,ACBD3
1049	NSD	14	6215083	6482138	267056	0.0179028	0.129889	2	LRGUK,XM_539369.2
1050	NSD	21	24301055	24567593	266539	0.0179028	0.129889	6	XP_851219.1,XM_534004.2,PAK1,GDPD4,ENSCAFG00000025150,ENSCAFG00000005074
1051	Dac	3	16252554	16538375	285822	0.0179949	0.130309	1
1052	Dac	28	13672562	13952839	280278	0.0179949	0.130309	13	RRP12,XM_534980.2,EXOSC1,ZDHHC16,MMS19,UBTD1,ANKRD2,DHDPSL,C10orf62,MORN4,ENSCAFG00000009222,XM_845909.1,ENSCAFG00000006833
1053	Eur	4	82412422	82685455	273034	0.0181818	0.131164	1	CDH9
1054	BrS	5	41885844	42155332	269489	0.0181818	0.131164	6	TEKT3,ENSCAFG00000027955,CDRT4,FAM18B,XM_858503.1,ENSCAFG00000027757
1055	BrS	36	22184914	22453447	268534	0.0181818	0.131164	2	XP_852254.1,ENSCAFG00000020851
1056	BrS	5	16440753	16705288	264536	0.0181818	0.131164	4	ENSCAFG00000020878,ARHGEF12,TMEM136,POU2F3
1057	ShP	7	3751983	4022725	270743	0.0189189	0.135966	10	LGR6,ENSCAFG00000010570,PTPN7,GPR37L1,ENSCAFG00000010507,ELF3,RNPEP,TIMM17A,ENSCAFG00000025451,ENSCAFG00000010633
1058	ShP	8	28375622	28644933	269312	0.0189189	0.135966	1
1059	ShP	13	22268402	22534019	265618	0.0189189	0.135966	4	COL14A1,MRPL13,MTBP,ENSCAFG00000000957
1060	ShP	6	32995803	33260944	265142	0.0189189	0.135966	3	SHISA9,ENSCAFG00000026607,CPPED1
1061	Gry	2	21913890	22173712	259823	0.019802	0.137603	4	XM_544242.2,ENSCAFG00000004508,STAM,ENSCAFG00000028223
1062	Gry	1	58420675	58678498	257824	0.019802	0.137603	3	Q6JDJ2_CANFA,KIF25,FRMD1
1063	Gry	13	28689330	28946535	257206	0.019802	0.137603	1
1064	BeT	3	55883084	56134051	250968	0.0195122	0.137603	10	ZNF710,IDH2,ENSCAFG00000012062,SEMA4B,CIB1,XM_536194.2,TTLL13,ENSCAFG00000012103,VPS33B,PRC1
1065	BeT	3	56758127	57008087	249961	0.0195122	0.137603	8	ENSCAFG00000023242,WDR73,NMB,SC11A_CANFA,ZNF592,ALPK3,SLC28A1,ENSCAFG00000022842
1066	IrW	9	5984381	6232762	248382	0.0196078	0.137603	3	TMC8,TMC6,ENSCAFG00000005224
1067	IrW	7	6026945	6275062	248118	0.0196078	0.137603	1
1068	GSh	3	68219772	68466584	246813	0.0198511	0.137603	1	ENSCAFG00000022028
1069	BeT	14	12647531	12894307	246777	0.0195122	0.137603	1	GRM8
1070	BeT	30	9483722	9729480	245759	0.0195122	0.137603	1	ENSCAFG00000021497
1071	GSh	30	9483722	9729480	245759	0.0198511	0.137603	1	ENSCAFG00000021497
1072	BeT	X	66846630	67091867	245238	0.0195122	0.137603	1
1073	GSh	17	3205199	3450214	245016	0.0198511	0.137603	1	ENSCAFG00000003206
1074	IrW	17	3205199	3450214	245016	0.0196078	0.137603	1	ENSCAFG00000003206
1075	GoS	16	5101210	5345090	243881	0.0195599	0.137603	1	ENSCAFG00000003479
1076	Sci	13	14467359	14709529	242171	0.0198511	0.137603	1	ENSCAFG00000000747
1077	GoS	8	45930850	46172886	242037	0.0195599	0.137603	3	DCAF5,EXD2,GALNTL1
1078	GoS	7	58733217	58974733	241517	0.0195599	0.137603	2	NOL4,ENSCAFG00000026834
1079	BeT	14	9666086	9907298	241213	0.0195122	0.137603	4	TMEM209,KLHDC10,ZC3HC1,UBE2H
1080	Sci	3	42773874	43015006	241133	0.0198511	0.137603	5	CHSY1,ENSCAFG00000002151,ENSCAFG00000023124,ENSCAFG00000010594,ALDH1A3
1081	BeT	12	34640898	34880965	240068	0.0195122	0.137603	2	ENSCAFG00000002537,ENSCAFG00000026030
1082	Sci	31	6292179	6532110	239932	0.0198511	0.137603	1
1083	BMD	5	42937434	43176690	239257	0.0193237	0.137603	2	ENSCAFG00000026219,CYTSB
1084	BeT	7	24278702	24517449	238748	0.0195122	0.137603	1	RASAL2
1085	Sci	17	8931945	9170042	238098	0.0198511	0.137603	2	KIDINS220,MBOAT2
1086	Sci	19	9916025	10153325	237301	0.0198511	0.137603	1
1087	BMD	21	4591456	4828296	236841	0.0193237	0.137603	1	ENSCAFG00000025022
1088	BeT	12	7384390	7621055	236666	0.0195122	0.137603	7	SCUBE3,ZNF76,DEF6,PPARD_CANFA,FANCE,ENSCAFG00000001318,TEAD3
1089	BMD	20	38300677	38537230	236554	0.0193237	0.137603	1	CACNA2D3
1090	BeT	8	43296684	43533086	236403	0.0195122	0.137603	1	ENSCAFG00000016266
1091	BeT	23	14430753	14666950	236198	0.0195122	0.137603	2	CCKN_CANFA,ENSCAFG00000025279
1092	BeT	15	40323018	40557971	234954	0.0195122	0.137603	1	ENSCAFG00000021949
1093	Rtw	1	7577154	7811190	234037	0.0195599	0.137603	2	ZNF407,ENSCAFG00000026962
1094	Rtw	1	27242129	27473960	231832	0.0195599	0.137603	3	ENSCAFG00000020845,MC2R,MC5R
1095	TYo	13	11238628	11466979	228352	0.0198511	0.137603	1
1096	TYo	25	14899294	15127163	227870	0.0198511	0.137603	2	POLR1D,LNX2
1097	TYo	7	63214014	63441357	227344	0.0198511	0.137603	1	ENSCAFG00000028394
1098	TYo	19	4569669	4796775	227107	0.0198511	0.137603	2	ENSCAFG00000003628,ZNF330
1099	TYo	24	7153586	7377627	224042	0.0198511	0.137603	1
1100	ESt	21	24657987	24896206	238220	0.02	0.138383	5	CAPN5,ENSCAFG00000024921,B3GNT6,ACER3,ENSCAFG00000005198
1101	ESt	21	23178919	23416967	238049	0.02	0.138383	3	ODZ4,NARS2,ENSCAFG00000027474
1102	CoS	29	11364920	11613871	248952	0.020202	0.138898	1
1103	CoS	12	30946479	31192027	245549	0.020202	0.138898	1	ENSCAFG00000002497
1104	CoS	1	104065686	104311173	245488	0.020202	0.138898	5	ZIM2,ENSCAFG00000023268,ENSCAFG00000002441,XM_541384.2,ENSCAFG00000002443
1105	CoS	24	39250849	39495900	245052	0.020202	0.138898	6	XM_849024.1,SLC9A8,Q1JUL3_CANFA,SPATA2,RNF114,Q8WNR6_CANFA
1106	CoS	6	49635652	49878134	242483	0.020202	0.138898	1
1107	CoS	31	6292179	6532110	239932	0.020202	0.138898	1
1108	CoS	4	59435093	59674945	239853	0.020202	0.138898	1
1109	Eur	13	3036181	3302919	266739	0.0207792	0.140085	4	LAPTM4B,MATN2,XM_843126.1,ENSCAFG00000025847
1110	Eur	33	9326332	9591476	265145	0.0207792	0.140085	1	FILIP1L
1111	Eur	13	13961864	14226394	264531	0.0207792	0.140085	1
1112	Eur	24	22652442	22915392	262951	0.0207792	0.140085	5	SDCBP2,SNPH,RAD21L1,C20orf46,PSMF1
1113	BoT	33	12630008	12892530	262523	0.0205128	0.140085	1	ENSCAFG00000009706
1114	BoT	28	6687005	6949367	262363	0.0205128	0.140085	4	FXYD4,RASGEF1A,CSGALNACT2,A2SXS8_CANFA
1115	BrS	32	7490779	7752746	261968	0.0207792	0.140085	2	FGF5_CANFA,XM_544947.2
1116	Eur	1	67841477	68102918	261442	0.0207792	0.140085	4	HINT3,NCOA7,TRMT11,ENSCAFG00000001059
1117	GSl	16	22161465	22422522	261058	0.0206186	0.140085	2	RNF32,LMBR1
1118	GSl	7	37611372	37871644	260273	0.0206186	0.140085	1	Q6PVW1_CANFA
1119	GSl	7	30735552	30994085	258534	0.0206186	0.140085	2	FMO3_CANFA,C1orf129
1120	Eur	2	51160698	51418867	258170	0.0207792	0.140085	1	XM_855285.1
1121	GSl	11	51327022	51584388	257367	0.0206186	0.140085	1
1122	Eur	8	28755326	29012374	257049	0.0207792	0.140085	1
1123	GSl	15	42001460	42257541	256082	0.0206186	0.140085	6	ANKS1B,ENSCAFG00000006682,RPL11,ENSCAFG00000006734,UHRF1BP1L,ENSCAFG00000023210
1124	Eur	31	6036401	6292179	255779	0.0207792	0.140085	1
1125	GSl	10	8862961	9117729	254769	0.0206186	0.140085	1	PPM1H
1126	Eur	33	4659453	4914057	254605	0.0207792	0.140085	4	PROS1,ARL13B,STX19,NSUN3
1127	GSl	17	19862680	20116553	253874	0.0206186	0.140085	1
1128	Eur	5	79269277	79522993	253717	0.0207792	0.140085	13	XM_847972.1,ENSCAFG00000020127,AARS,ENSCAFG00000024535,DDX19A,ST3GAL2,ENSCAFG00000022198,FUK,ENSCAFG00000022507,COG4,SF3B3,ENSCAFG00000026736,ENSCAFG00000027432
1129	GSl	3	35701884	35955395	253512	0.0206186	0.140085	1	GABRG3
1130	Eur	30	24244363	24497824	253462	0.0207792	0.140085	2	RFX7,ENSCAFG00000016036
1131	GRe	15	28860127	29131922	271796	0.0209424	0.140936	1
1132	GRe	1	77193954	77461239	267286	0.0209424	0.140936	1	ENSCAFG00000022393
1133	ShP	13	10819921	11079568	259648	0.0216216	0.145378	2	ENSCAFG00000000684,XM_844664.1
1134	Dob	31	7293055	7528866	235812	0.0218447	0.146748	1	ENSCAFG00000007828
1135	Rtw	11	57032893	57260953	228061	0.0220049	0.147435	6	FRMPD1,RG9MTD3,EXOSC3,DCAF10,ENSCAFG00000002395,SHB
1136	Rtw	2	75982019	76208307	226289	0.0220049	0.147435	10	Q9GK59_CANFA,FAM46B,C1orf172,NUDC,NR0B2,GPATCH3,GPN2,SFN,ZDHHC18,PIGV
1137	Rtw	16	11999868	12225445	225578	0.0220049	0.147435	3	HIPK2,ENSCAFG00000026720,ENSCAFG00000025858
1138	Gry	7	21104346	21360093	255748	0.0222772	0.147777	4	ENSCAFG00000027187,RNF2,C1orf25,C1orf26
1139	LRe	5	24267730	24521527	253798	0.0222222	0.147777	7	CRYAB,FDXACB1,ENSCAFG00000014143,ENSCAFG00000026111,PPP2R1B,SIK2,LAYN
1140	Gry	12	70816532	71068186	251655	0.0222772	0.147777	3	REV3L,ENSCAFG00000027455,ENSCAFG00000003960
1141	EBD	15	43924220	44171614	247395	0.0224439	0.147777	5	CCDC53,NUP37,ENSCAFG00000027023,C12orf48,MCH_CANFA
1142	EBD	3	34570718	34817750	247033	0.0224439	0.147777	2	HERC2,ENSCAFG00000021957
1143	EBD	13	7086495	7331416	244922	0.0224439	0.147777	5	ENSCAFG00000000632,ENSCAFG00000000634,ODF1,ENSCAFG00000028289,KLF10
1144	EBD	37	9960540	10205152	244613	0.0224439	0.147777	12	ENSCAFG00000010865,HSPE1,MOBKL3,ENSCAFG00000000595,ENSCAFG00000021156,RFTN2,MARS2,ENSCAFG00000028266,BOLL,ENSCAFG00000026829,,COQ10B
1145	GSh	X	58327283	58571018	243736	0.0223325	0.147777	10	ENSCAFG00000022477,SNX12,FOXO4,IL2RG,MED12,NLGN3,GJB1,ZMYM3,ENSCAFG00000017071,ITGB1BP2
1146	GSh	10	11017208	11260040	242833	0.0223325	0.147777	1	MSRB3
1147	GSh	3	69127226	69368988	241763	0.0223325	0.147777	3	ENSCAFG00000015386,ENSCAFG00000015391,XM_536235.2
1148	GSh	7	29870265	30111778	241514	0.0223325	0.147777	2	DNM3,ENSCAFG00000025064
1149	GSh	17	3538051	3779189	241139	0.0223325	0.147777	2	SNTG2,PERT_CANFA
1150	GSh	17	18503294	18744242	240949	0.0223325	0.147777	3	C2orf43,HS1BP3,GDF7
1151	GSh	15	44042324	44281911	239588	0.0223325	0.147777	3	C12orf48,MCH_CANFA,IGF1_CANFA
1152	JRT	23	18788680	19027045	238366	0.0224439	0.147777	3	ZCWPW2,AZI2,CMC1
1153	JRT	37	13803088	14041303	238216	0.0224439	0.147777	3	ALS2,ENSCAFG00000024455,PFTK2
1154	JRT	8	74164465	74402150	237686	0.0224439	0.147777	7	MARK3,ENSCAFG00000021936,ENSCAFG00000022226,KCRB_CANFA,TRMT61A,BAG5,ENSCAFG00000018280
1155	JRT	10	31161067	31398282	237216	0.0224439	0.147777	3	MYH9_CANFA,ENSCAFG00000001689,ENSCAFG00000023115
1156	GSh	10	24495249	24731582	236334	0.0223325	0.147777	5	KIAA1644,PARVG,PARVB,ENSCAFG00000026928,SAMM50
1157	TYo	17	40052531	40274974	222444	0.0223325	0.147777	7	CKAP2L,IL1A_CANFA,IL1B_CANFA,XM_849582.1,IL1F7,IL1F9,IL1F8
1158	StP	9	58229061	58487289	258229	0.0225	0.148018	11	PKN3,WDR34,Q864L2_CANFA,GLE1,ODF2,ENSCAFG00000027738,XM_846166.1,CERCAM,ENSCAFG00000021492,cfa-mir-219-2,URM1
1159	CoS	1	16972637	17211179	238543	0.0227273	0.149127	2	PHLPP1,ENSCAFG00000023652
1160	CoS	11	14999125	15237204	238080	0.0227273	0.149127	3	SRFBP1,LOX,ZNF474
1161	CoS	25	5918027	6154993	236967	0.0227273	0.149127	2	TRPC4,POSTN
1162	FSp	5	8461462	8718248	256787	0.0229008	0.149878	1	ARHGAP32
1163	FSp	22	43655731	43908667	252937	0.0229008	0.149878	3	ENSCAFG00000026089,ENSCAFG00000005298,ENSCAFG00000021099
1164	FSp	10	5826381	6075468	249088	0.0229008	0.149878	1	ENSCAFG00000027210
1165	NSD	13	30764157	31025649	261493	0.0230179	0.150386	2	ADCY8,ENSCAFG00000026983
1166	NSD	1	4321002	4582240	261239	0.0230179	0.150386	2	ATP9B,SALL3
1167	Dac	27	26129432	26405753	276322	0.0231362	0.150901	1
1168	Dac	11	46799066	47072725	273660	0.0231362	0.150901	2	ENSCAFG00000007543,ENSCAFG00000001693
1169	GSl	15	9463219	9714168	250950	0.0231959	0.15116	4	PSMB2,NCDN,KIAA0319L,ZMYM4
1170	Eur	2	15863570	16112373	248804	0.0233766	0.152208	1	ENSCAFG00000027920
1171	GRe	15	22563605	22829402	265798	0.0235602	0.153141	4	ENSCAFG00000026389,ZDHHC17,RPL23AP53,CSRP2
1172	GRe	35	3236496	3500198	263703	0.0235602	0.153141	3	ENSCAFG00000025137,ENSCAFG00000009151,ENSCAFG00000025055
1173	Wei	11	6026012	6283243	257232	0.0246305	0.154086	1
1174	ShP	3	39112556	39368647	256092	0.0243243	0.154086	3	NDN,ENSCAFG00000010136,ENSCAFG00000010141
1175	Wei	14	39565671	39821186	255516	0.0246305	0.154086	5	FAM126A,ENSCAFG00000021723,ENSCAFG00000026155,MYEOV2,KLHL7
1176	Wei	15	30292263	30547754	255492	0.0246305	0.154086	3	RASSF9,NEUT_CANFA,MGAT4C
1177	ShP	13	11920014	12174294	254281	0.0243243	0.154086	3	EIF3E,ENSCAFG00000000705,XM_847922.1
1178	Wei	2	33734027	33987314	253288	0.0246305	0.154086	1
1179	Wei	13	51246757	51499946	253190	0.0246305	0.154086	3	ENSCAFG00000002200,ENSCAFG00000027026,KIAA1211
1180	Wei	10	32296059	32548482	252424	0.0246305	0.154086	1
1181	Wei	20	26075176	26327358	252183	0.0246305	0.154086	1	ENSCAFG00000006581
1182	StP	15	62058879	62310660	251782	0.025	0.154086	1	ENSCAFG00000021615
1183	ShP	13	31524738	31776337	251600	0.0243243	0.154086	5	ENSCAFG00000027711,EFR3A,ENSCAFG00000021694,OC90,ENSCAFG00000025196
1184	ShP	12	54420442	54671021	250580	0.0243243	0.154086	1
1185	StP	23	35262851	35513361	250511	0.025	0.154086	2	ENSCAFG00000027237,ENSCAFG00000028036
1186	StP	4	44980187	45230633	250447	0.025	0.154086	2	DOCK2,FAM196B
1187	Gry	3	46498642	46748610	249969	0.0247525	0.154086	1
1188	StP	6	65195585	65444790	249206	0.025	0.154086	3	COL24A1,ENSCAFG00000020271,ZNHIT6
1189	Wei	22	38163570	38412718	249149	0.0246305	0.154086	1	ENSCAFG00000005273
1190	Gry	10	5826381	6075468	249088	0.0247525	0.154086	1	ENSCAFG00000027210
1191	Wei	20	25395918	25644677	248760	0.0246305	0.154086	3	FRMD4B,LMOD3,ARL6IP5
1192	Wei	1	31886786	32134656	247871	0.0246305	0.154086	3	BCLAF1,ENSCAFG00000026399,MAP7
1193	ShP	13	40797838	41044568	246731	0.0243243	0.154086	18	ENSCAFG00000001573,FBXL6,ENSCAFG00000001588,ADCK5,CPSF1,ENSCAFG00000001607,VPS28,NFKBIL2,CYHR1,KIFC2,FOXH1,PPP1R16A,GPT,MFSD3,RECQL4,LRRC14,LRRC24,ARHGAP39
1194	ShP	13	14988044	15234045	246002	0.0243243	0.154086	1
1195	Wei	10	46434749	46680527	245779	0.0246305	0.154086	9	EIF5B,TXNDC9,LYG1,LYG2,XM_534877.2,ENSCAFG00000023870,MITD1,LIPT1,ENSCAFG00000002299
1196	Wei	11	31173993	31418816	244824	0.0246305	0.154086	1
1197	Wei	31	34566305	34810682	244378	0.0246305	0.154086	4	ENSCAFG00000025862,ENSCAFG00000026922,DYRK1A,XP_849652.1
1198	StP	14	36962999	37206024	243026	0.025	0.154086	1	MACC1
1199	StP	13	3036181	3278970	242790	0.025	0.154086	2	LAPTM4B,MATN2
1200	StP	26	24306131	24548460	242330	0.025	0.154086	3	PITPNB,TTC28,ENSCAFG00000028311
1201	Wei	23	20035095	20277289	242195	0.0246305	0.154086	1	NEK10
1202	StP	6	56550178	56791784	241607	0.025	0.154086	1
1203	EBD	X	84105325	84344404	239080	0.0249377	0.154086	3	FRMPD3,ENSCAFG00000017976,TSC22D3
1204	JRT	13	13752108	13988738	236631	0.0249377	0.154086	2	ENSCAFG00000000746,ENSCAFG00000025989
1205	Sci	27	24121179	24357679	236501	0.0248139	0.154086	1	ITPR2
1206	Sci	23	39061761	39297740	235980	0.0248139	0.154086	1
1207	GoS	29	22265738	22501238	235501	0.0244499	0.154086	2	NCOA2,ENSCAFG00000020735
1208	BoC	12	34495010	34730174	235165	0.0245098	0.154086	1	ENSCAFG00000002537
1209	BoC	11	45785355	46020241	234887	0.0245098	0.154086	1	ENSCAFG00000021101
1210	GSh	19	40143854	40378640	234787	0.0248139	0.154086	1	ENSCAFG00000005012
1211	ESt	14	45998253	46233027	234775	0.025	0.154086	3	ENSCAFG00000028192,NOD1,GGCT
1212	BoC	24	12763858	12998517	234660	0.0245098	0.154086	1
1213	JRT	7	6608225	6842776	234552	0.0249377	0.154086	1	ENSCAFG00000027868
1214	JRT	10	61914795	62149220	234426	0.0249377	0.154086	1
1215	Dob	17	12603673	12838045	234373	0.0242718	0.154086	1
1216	GoS	7	30793374	31027216	233843	0.0244499	0.154086	2	FMO3_CANFA,C1orf129
1217	GoS	25	16588785	16822600	233816	0.0244499	0.154086	2	ENSCAFG00000007007,ENSCAFG00000025825
1218	BoC	29	32995493	33229019	233527	0.0245098	0.154086	1
1219	JRT	18	42587080	42820551	233472	0.0249377	0.154086	20	Q70ZK3_CANFA,Q70ZD0_CANFA,ENSCAFG00000024117,Q70ZG9_CANFA,ENSCAFG00000025579,XM_540650.2,Q70ZD3_CANFA,ENSCAFG00000008060,ENSCAFG00000024113,Q70ZJ6_CANFA,Q6W6U6_CANFA,XM_533183.2,XM_848042.1,Q70ZK2_CANFA,Q28303_CANFA,ENSCAFG00000008075,ENSCAFG00000008078,XM_848085.1,ENSCAFG00000008084,XM_540658.2
1220	GSh	13	51246757	51480096	233340	0.0248139	0.154086	3	ENSCAFG00000002200,ENSCAFG00000027026,KIAA1211
1221	Elk	13	51246757	51480096	233340	0.0245098	0.154086	3	ENSCAFG00000002200,ENSCAFG00000027026,KIAA1211
1222	GoS	15	29521660	29754948	233289	0.0244499	0.154086	2	SLC6A15,LRRIQ1
1223	JRT	20	4620996	4854057	233062	0.0249377	0.154086	5	GPR175,MCM2,Q3HR32_CANFA,ABTB1,MGLL
1224	JRT	6	56236944	56469738	232795	0.0249377	0.154086	1
1225	GSh	18	44041219	44273840	232622	0.0248139	0.154086	17	OR4C15,Q70ZA3_CANFA,XM_848572.1,XM_848578.1,Q70Z96_CANFA,XM_540711.2,ENSCAFG00000024607,Q70ZK8_CANFA,Q70ZK1_CANFA,Q30428_CANFA,Q70ZG1_CANFA,ENSCAFG00000008247,XM_540715.2,XM_540716.2,ENSCAFG00000008240,Q70ZB1_CANFA,XM_540719.2
1226	GoS	25	18375965	18608359	232395	0.0244499	0.154086	1
1227	BeT	17	53060535	53292344	231810	0.0243902	0.154086	1	EXOC6B
1228	BeT	22	29856711	30088333	231623	0.0243902	0.154086	2	DIS3,PIBF1
1229	GSh	10	15728316	15959375	231060	0.0248139	0.154086	3	TSPAN8,ENSCAFG00000027601,ENSCAFG00000021571
1230	BeT	12	17727431	17957977	230547	0.0243902	0.154086	5	CYP39A1,PAFA_CANFA,ENSCAFG00000027442,SLC25A27,TDRD6
1231	BoC	3	57178980	57409524	230545	0.0245098	0.154086	6	RS17_CANFA,PDE8A,ENSCAFG00000027297,CPEB1,AP3B2,ENSCAFG00000013131
1232	BoC	4	5588012	5814043	226032	0.0245098	0.154086	4	Q8WN72_CANFA,ENSCAFG00000008063,ENSCAFG00000028329,ENSCAFG00000028199
1233	BoC	28	13350192	13572557	222366	0.0245098	0.154086	2	Q59I58_CANFA,ARHGAP19
1234	Rtw	29	35751689	35973136	221448	0.0244499	0.154086	1	CNGB3_CANFA
1235	TYo	29	7770420	7989369	218950	0.0248139	0.154086	1
1236	TYo	4	14978212	15196788	218577	0.0248139	0.154086	3	SLC16A9,CCDC6,ENSCAFG00000022409
1237	FSp	31	28333145	28580195	247051	0.0254453	0.156451	1	ENSCAFG00000024282
1238	FSp	22	19701356	19947690	246335	0.0254453	0.156451	2	ENSCAFG00000006066,ENSCAFG00000026813
1239	FSp	14	24189817	24435775	245959	0.0254453	0.156451	3	DYNC1I1,ENSCAFG00000020789,SLC25A13
1240	Dac	13	51211619	51480096	268478	0.0257069	0.157045	3	ENSCAFG00000002200,ENSCAFG00000027026,KIAA1211
1241	Dac	22	35501676	35766999	265324	0.0257069	0.157045	2	RBM26,NDFIP2
1242	Bgl	5	63568036	63828640	260605	0.0255754	0.157045	1
1243	Dac	21	23988521	24245577	257057	0.0257069	0.157045	3	RSF1,ICLN_CANFA,AQP11
1244	Dac	1	56052747	56309755	257009	0.0257069	0.157045	1	ENSCAFG00000000776
1245	Dac	11	31211122	31468002	256881	0.0257069	0.157045	1
1246	Dac	18	13559159	13815680	256522	0.0257069	0.157045	2	ENSCAFG00000022165,VPS41
1247	Dac	14	6419963	6671545	251583	0.0257069	0.157045	1	XM_539369.2
1248	BrS	15	23099961	23360436	260476	0.025974	0.157791	1
1249	Eur	10	5035631	5280491	244861	0.025974	0.157791	1
1250	Eur	10	69375178	69617786	242609	0.025974	0.157791	1
1251	Eur	6	36348436	36590724	242289	0.025974	0.157791	5	USP7,CARHSP1,PMM2,ABAT,C16orf68
1252	Eur	7	39731314	39973299	241986	0.025974	0.157791	1	ENSCAFG00000027201
1253	Eur	17	6205371	6446626	241256	0.025974	0.157791	1	ENSCAFG00000027282
1254	Eur	6	37262295	37501824	239530	0.025974	0.157791	1	ENSCAFG00000019082
1255	GRe	7	60850462	61113360	262899	0.026178	0.158579	5	B4GALT6,TTR,DSG2,DSG3_CANFA,DSG4
1256	GRe	4	26802001	27063920	261920	0.026178	0.158579	7	XM_847468.1,P4HA1,NUDT13,ECD,XM_847232.1,DNAJC9,TTC18
1257	LRe	6	9698547	9944620	246074	0.0271605	0.158579	8	BCL7B,BAZ1B,FZD9,FKBP6,ENSCAFG00000013047,ENSCAFG00000013197,ENSCAFG00000013253,ENSCAFG00000013328
1258	LRe	12	34761217	35006252	245036	0.0271605	0.158579	2	ENSCAFG00000026030,XM_861940.1
1259	LRe	29	32064666	32308598	243933	0.0271605	0.158579	2	ENSCAFG00000026877,RPL23
1260	LRe	30	3111771	3355581	243811	0.0271605	0.158579	5	OR4K15,OR4F15,XM_544580.2,ENSCAFG00000024251,ENSCAFG00000007730
1261	LRe	11	61576119	61819774	243656	0.0271605	0.158579	1	ENSCAFG00000024636
1262	Gry	18	8578883	8821400	242518	0.0272277	0.158579	1	ENSCAFG00000022264
1263	Gry	24	6671385	6913345	241961	0.0272277	0.158579	1
1264	Gry	9	5177026	5418477	241452	0.0272277	0.158579	4	ENSCAFG00000026100,ENSCAFG00000005547,ENGASE,C1QTNF1
1265	Wei	12	34640898	34880965	240068	0.0270936	0.158579	2	ENSCAFG00000002537,ENSCAFG00000026030
1266	Gry	13	7957327	8197127	239801	0.0272277	0.158579	1	RIMS2
1267	Wei	2	22015714	22252883	237170	0.0270936	0.158579	4	ENSCAFG00000004508,STAM,ENSCAFG00000028223,PTPLA_CANFA
1268	Wei	1	83045412	83282468	237057	0.0270936	0.158579	1
1269	IrW	9	6876692	7110867	234176	0.0269608	0.158579	6	MGAT5B,MFSD11,SFRS2,C17orf95,JMJD6,Q00M93_CANFA
1270	Wei	1	7577154	7811190	234037	0.0270936	0.158579	2	ZNF407,ENSCAFG00000026962
1271	BMD	13	51246757	51480096	233340	0.02657	0.158579	3	ENSCAFG00000002200,ENSCAFG00000027026,KIAA1211
1272	Elk	6	49974800	50207512	232713	0.0269608	0.158579	1	RNPC3
1273	Elk	8	34877960	35109895	231936	0.0269608	0.158579	2	PELI2,ENSCAFG00000021085
1274	Elk	4	20617933	20849589	231657	0.0269608	0.158579	1	XM_844561.1
1275	BMD	3	6148587	6379817	231231	0.02657	0.158579	2	FER_CANFA,ENSCAFG00000024308
1276	BMD	1	92923364	93154336	230973	0.02657	0.158579	1	DMRT2
1277	Dob	11	70495965	70726642	230678	0.026699	0.158579	8	ENSCAFG00000023218,SLC31A2,FKBP15,SLC31A1,CDC26,PRPF4,RNF183,WDR31
1278	Elk	28	11167230	11397886	230657	0.0269608	0.158579	1	PLCE1
1279	BMD	1	91828709	92059102	230394	0.02657	0.158579	2	C9orf71,PGM5
1280	BMD	4	58501731	58732119	230389	0.02657	0.158579	1	GALNT10
1281	Dob	16	34454776	34684878	230103	0.026699	0.158579	2	ENSCAFG00000027068,NRG1
1282	Dob	X	105385154	105614725	229572	0.026699	0.158579	5	IGSF1,ENSCAFG00000023200,ENSCAFG00000023198,ENSCAFG00000018811,ENSCAFG00000018815
1283	BeT	5	66968865	67197981	229117	0.0268293	0.158579	4	RPL13,ENSCAFG00000021886,SPG7,ANKRD11
1284	Dob	17	6039523	6268426	228904	0.026699	0.158579	1
1285	GoS	28	25704590	25933225	228636	0.0268949	0.158579	1
1286	Elk	7	3659746	3888202	228457	0.0269608	0.158579	6	PPP1R12B,UBE2T,LGR6,ENSCAFG00000010570,PTPN7,GPR37L1
1287	Dob	11	67064442	67292655	228214	0.026699	0.158579	6	IKBKAP,C9orf6,LOC612462,C9orf5,cfa-mir-32,ENSCAFG00000023958
1288	BeT	30	4064847	4292944	228098	0.0268293	0.158579	2	AVEN,RYR3
1289	GoS	X	72842602	73069898	227297	0.0268949	0.158579	3	ENSCAFG00000027382,Q9TTK3_CANFA,ENSCAFG00000023325
1290	BeT	19	3039014	3266191	227178	0.0268293	0.158579	4	GAB1,ENSCAFG00000025040,ENSCAFG00000025013,USP38
1291	Dob	37	4013783	4240312	226530	0.026699	0.158579	6	ENSCAFG00000025501,MFSD6,TMEM194B,ENSCAFG00000027840,ENSCAFG00000028382,NAB1
1292	Dob	8	4424117	4650352	226236	0.026699	0.158579	1	SLC24A4
1293	Dob	7	23228365	23454306	225942	0.026699	0.158579	6	TDRD5,NPHS2,ENSCAFG00000013837,C1orf125,ENSCAFG00000025000,SOAT1
1294	GoS	20	5183347	5409204	225858	0.0268949	0.158579	1	EEFSEC
1295	Dob	1	50239881	50465708	225828	0.026699	0.158579	5	ENSCAFG00000000618,ENSCAFG00000028358,ENSCAFG00000000624,XM_849896.1,SNX9
1296	Dob	1	4920539	5142396	221858	0.026699	0.158579	1
1297	Dob	1	41295132	41516973	221842	0.026699	0.158579	3	STXBP5,ENSCAFG00000000362,ENSCAFG00000026536
1298	Dob	X	86171873	86393321	221449	0.026699	0.158579	3	ENSCAFG00000023458,TMEM164,cfa-mir-652
1299	GoS	15	39241402	39462539	221138	0.0268949	0.158579	2	C12orf55,C12orf63
1300	BoC	3	44606365	44827161	220797	0.0269608	0.158579	1
1301	Dob	21	12914492	13135198	220707	0.026699	0.158579	3	ENSCAFG00000004285,ENSCAFG00000004288,CHORDC1
1302	BoC	22	29279147	29499729	220583	0.0269608	0.158579	1
1303	BoC	24	3657881	3878201	220321	0.0269608	0.158579	1	XM_542863.2
1304	BoC	22	33705367	33925461	220095	0.0269608	0.158579	1	MYCBP2
1305	Dob	22	33705367	33925461	220095	0.026699	0.158579	1	MYCBP2
1306	Dob	15	9494298	9714168	219871	0.026699	0.158579	4	PSMB2,NCDN,KIAA0319L,ZMYM4
1307	Dob	3	64289056	64508829	219774	0.026699	0.158579	3	SH3BP2,TNIP2,C4orf8
1308	Rtw	19	42168749	42388087	219339	0.0268949	0.158579	1
1309	GSh	5	64887855	65112634	224780	0.0272953	0.158729	1	ENSCAFG00000019688
1310	TYo	24	24127145	24343706	216562	0.0272953	0.158729	7	NP_001003072.1,TPX2,MYLK2,FOXS1,ENSCAFG00000007099,ENSCAFG00000025117,TTLL9
1311	JRT	13	55016015	55246961	230947	0.0274314	0.159157	1	ENSCAFG00000027785
1312	JRT	7	54089953	54320674	230722	0.0274314	0.159157	1
1313	JRT	1	58851686	59079304	227619	0.0274314	0.159157	1	SMOC2
1314	ESt	13	51246757	51480096	233340	0.0275	0.159312	3	ENSCAFG00000002200,ENSCAFG00000027026,KIAA1211
1315	ESt	21	24381850	24613270	231421	0.0275	0.159312	4	PAK1,GDPD4,ENSCAFG00000025150,ENSCAFG00000005074
1316	NFd	37	17550811	17786103	235293	0.0277078	0.160029	6	INO80D,NDUFS1,EEF1B2,ENSCAFG00000026348,ENSCAFG00000021390,GPR1
1317	NFd	3	19050898	19285614	234717	0.0277078	0.160029	1	ENSCAFG00000021037
1318	NFd	3	83499102	83733096	233995	0.0277078	0.160029	1	ENSCAFG00000027541
1319	NFd	13	51246757	51480096	233340	0.0277078	0.160029	3	ENSCAFG00000002200,ENSCAFG00000027026,KIAA1211
1320	CoS	21	42275287	42510675	235389	0.0277778	0.160069	1	SOX6
1321	CoS	1	24538208	24773344	235137	0.0277778	0.160069	1	ENSCAFG00000028063
1322	CoS	1	104421765	104655098	233334	0.0277778	0.160069	5	ENSCAFG00000021551,ZNF707,XM_848788.1,ENSCAFG00000002476,ZNF582
1323	FSp	18	53430015	53673127	243113	0.0279898	0.161047	6	PC,LRFN4,RCE1,C11orf80,Q6PXD7_CANFA,SPTBN2
1324	FSp	8	47903947	48145821	241875	0.0279898	0.161047	1	SIPA1L1
1325	NSD	38	7086245	7346629	260385	0.028133	0.161675	1
1326	BoT	3	93955329	94211980	256652	0.0282051	0.161675	4	ANAPC13,LCORL,NCAPG,DCAF16
1327	BoT	7	56939068	57193535	254468	0.0282051	0.161675	6	MOCOS,ELP2,SLC39A6,RPRD1A,C18orf21,ENSCAFG00000027321
1328	BoT	2	38749375	38998310	248936	0.0282051	0.161675	14	PCDHA1,PCDHA3,PCDHA4,PCDHA5,ENSCAFG00000023254,PCDHA10,XM_843882.1,ENSCAFG00000006064,PCDHA11,PCDHA12,PCDHA13,ENSCAFG00000022979,PCDHAC2,XM_544296.1
1329	BoT	5	41997987	42246436	248450	0.0282051	0.161675	4	CDRT4,FAM18B,XM_858503.1,ENSCAFG00000027757
1330	BrS	5	49745678	50005191	259514	0.0285714	0.162917	6	ALG6,ENSCAFG00000027470,FOXD3,ENSCAFG00000027619,ENSCAFG00000018712,ENSCAFG00000018716
1331	BrS	7	21104346	21360093	255748	0.0285714	0.162917	4	ENSCAFG00000027187,RNF2,C1orf25,C1orf26
1332	BrS	37	33179989	33434217	254229	0.0285714	0.162917	1
1333	BrS	26	11261918	11514940	253023	0.0285714	0.162917	11	ANAPC7,ENSCAFG00000008456,GPN3,VPS29,RAD9B,ENSCAFG00000020796,PPTC7,TCTN1,HVCN1,NP_001003069.1,PP1G_CANFA
1334	BrS	26	27699306	27950816	251511	0.0285714	0.162917	5	DEPDC5,ENSCAFG00000013310,YWHAH,ENSCAFG00000013339,NP_001007142.1
1335	BrS	15	56640240	56886881	246642	0.0285714	0.162917	2	ENSCAFG00000008610,ENSCAFG00000027778
1336	BrS	28	10583870	10829836	245967	0.0285714	0.162917	5	MYOF,ENSCAFG00000022110,CEP55,GPR120,Q7M3A1_CANFA
1337	GRe	25	10176521	10432203	255683	0.0287958	0.163829	5	KL,ENSCAFG00000027520,ENSCAFG00000027850,PDS5B,ENSCAFG00000006373
1338	GRe	15	42101388	42355726	254339	0.0287958	0.163829	5	ENSCAFG00000006734,UHRF1BP1L,ENSCAFG00000023210,ENSCAFG00000006711,ACTR6
1339	GRe	30	29548601	29802578	253978	0.0287958	0.163829	1	VPS13C
1340	BeT	20	5183347	5409204	225858	0.0292683	0.166268	1	EEFSEC
1341	BeT	18	3148801	3373157	224357	0.0292683	0.166268	1	ABCA13
1342	LRe	25	17733568	17976690	243123	0.0296296	0.166671	2	XM_846206.1,MIPEP
1343	ShP	13	57515204	57757055	241852	0.0297297	0.166671	1
1344	LRe	7	5480551	5722210	241660	0.0296296	0.166671	3	DDX59,KIF14,ZNF281
1345	ShP	19	16146001	16387222	241222	0.0297297	0.166671	3	HSPA4L,SLC25A31,INTU
1346	LRe	17	60206311	60447092	240782	0.0296296	0.166671	1	PDE4DIP
1347	LRe	1	19062523	19302352	239830	0.0296296	0.166671	2	Q4JIV8_CANFA,ENSCAFG00000028239
1348	LRe	13	53344863	53584644	239782	0.0296296	0.166671	1
1349	LRe	3	18151730	18390288	238559	0.0296296	0.166671	1	FAM172A
1350	LRe	12	45741867	45978819	236953	0.0296296	0.166671	3	ENSCAFG00000002862,ENSCAFG00000027934,TPBG
1351	LRe	27	7158189	7395038	236850	0.0296296	0.166671	2	DIP2B,LARP4
1352	LRe	31	3009467	3244617	235151	0.0296296	0.166671	5	Q70Z78_CANFA,XM_843186.1,ENSCAFG00000024833,CGGBP1,XM_535550.2
1353	LRe	6	55103756	55338097	234342	0.0296296	0.166671	1	XP_849822.1
1354	LRe	12	30468661	30702411	233751	0.0296296	0.166671	1	XM_546026.2
1355	LRe	2	15733719	15965882	232164	0.0296296	0.166671	2	PLXDC2,ENSCAFG00000022037
1356	GSh	11	29470043	29694574	224532	0.0297767	0.166671	2	CTNNA1,SIL1
1357	GSh	17	21954246	22176549	222304	0.0297767	0.166671	4	NCOA1,C2orf79,CENPO,ADCY3
1358	GSh	4	77676501	77898476	221976	0.0297767	0.166671	1
1359	BoC	21	40866371	41086174	219804	0.0294118	0.166671	2	B3XXE8_CANFA,CRSP2_CANFA
1360	TYo	1	115646651	115862745	216095	0.0297767	0.166671	8	CYP2S1,ENSCAFG00000024538,CP2BB_CANFA,ENSCAFG00000005065,Q307K7_CANFA,ENSCAFG00000023849,ENSCAFG00000020702,Q307K8_CANFA
1361	TYo	5	6438626	6654666	216041	0.0297767	0.166671	2	ENSCAFG00000021116,ENSCAFG00000026662
1362	JRT	4	20059751	20285701	225951	0.0299252	0.167379	1
1363	StP	24	8926829	9166887	240059	0.03	0.167551	3	OTOR,LOC477148,ENSCAFG00000005525
1364	ESt	19	9179776	9407591	227816	0.03	0.167551	1
1365	NFd	35	3840643	4073892	233250	0.0302267	0.168201	1	EXOC2
1366	NFd	23	23894781	24127258	232478	0.0302267	0.168201	1
1367	NFd	5	54015148	54246492	231345	0.0302267	0.168201	3	MYSM1,TACSTD2,OMA1
1368	NFd	9	23972204	24196811	224608	0.0302267	0.168201	11	STAT5B,GHDC,OREX_CANFA,KCNH4,RAB5C_CANFA,HSPB9,KAT2A,DHX58,ZNF385C,NKIRAS2,DNAJC7
1369	NFd	7	55383953	55608512	224560	0.0302267	0.168201	1
1370	CoS	22	5937680	6170316	232637	0.030303	0.168503	2	RCBTB2,Q9N122_CANFA
1371	FSp	14	8055279	8295007	239729	0.0305344	0.169541	2	PLXNA4,ENSCAFG00000023884
1372	FSp	15	14825871	15062251	236381	0.0305344	0.169541	1
1373	NSD	5	5873621	6132159	258539	0.0306905	0.170037	1	OPCML
1374	NSD	21	3667088	3924349	257262	0.0306905	0.170037	2	ARHGAP42,ENSCAFG00000027529
1375	NSD	14	20719752	20976446	256695	0.0306905	0.170037	5	ENSCAFG00000001947,KRIT1,ANKIB1,XM_847212.1,ENSCAFG00000027306
1376	GSl	13	57515204	57757055	241852	0.0309278	0.170854	1
1377	GSl	17	3538051	3779189	241139	0.0309278	0.170854	2	SNTG2,PERT_CANFA
1378	GSl	24	3049146	3289924	240779	0.0309278	0.170854	6	XM_843201.1,CST8,ENSCAFG00000005120,CST11,NAPB,GZF1
1379	GSl	23	44981216	45219826	238611	0.0309278	0.170854	1
1380	BrS	31	3140142	3381979	241838	0.0311688	0.171316	3	CGGBP1,XM_535550.2,HTR1F
1381	BrS	3	85348386	85589719	241334	0.0311688	0.171316	1
1382	BrS	8	7732816	7973145	240330	0.0311688	0.171316	1
1383	BrS	11	21002974	21242536	239563	0.0311688	0.171316	1	ISOC1
1384	BrS	9	59966111	60204605	238495	0.0311688	0.171316	4	Q865U7_CANFA,ENSCAFG00000023311,ENSCAFG00000020172,ENSCAFG00000027902
1385	BrS	36	25938837	26175527	236691	0.0311688	0.171316	1	ZNF385B
1386	BrS	29	10103167	10339351	236185	0.0311688	0.171316	3	ENSCAFG00000007005,TMEM68,TGS1
1387	IrW	13	51246757	51480096	233340	0.0318627	0.173876	3	ENSCAFG00000002200,ENSCAFG00000027026,KIAA1211
1388	Elk	37	33209306	33434217	224912	0.0318627	0.173876	1
1389	Elk	4	41630656	41854359	223704	0.0318627	0.173876	2	XM_861133.1,CPEB4
1390	Elk	31	28333145	28556562	223418	0.0318627	0.173876	1	ENSCAFG00000024282
1391	Elk	25	34599665	34822112	222448	0.0318627	0.173876	2	ENSCAFG00000008918,XM_845781.1
1392	Elk	20	10529976	10752376	222401	0.0318627	0.173876	1	SLC6A11
1393	GoS	12	42033574	42252974	219401	0.0317848	0.173876	1	ENSCAFG00000021892
1394	GoS	7	30280156	30498422	218267	0.0317848	0.173876	3	MYOC_CANFA,BAT2D1,ENSCAFG00000026140
1395	BoC	22	26109365	26327316	217952	0.0318627	0.173876	1
1396	Rtw	1	83015149	83230585	215437	0.0317848	0.173876	1
1397	LRe	1	7174154	7403408	229255	0.0320988	0.174414	2	TSHZ1,ZADH2
1398	LRe	8	30583762	30812262	228501	0.0320988	0.174414	1	ENSCAFG00000028167
1399	LRe	24	27986022	28214229	228208	0.0320988	0.174414	3	XM_542979.2,C20orf4,DLGAP4
1400	LRe	17	15740558	15968610	228053	0.0320988	0.174414	1
1401	LRe	4	50113856	50341011	227156	0.0320988	0.174414	1	ENSCAFG00000021437
1402	LRe	5	50187749	50410207	222459	0.0320988	0.174414	1	ATG4C
1403	Gry	11	45785355	46020241	234887	0.0321782	0.174597	1	ENSCAFG00000021101
1404	Gry	9	6876692	7110867	234176	0.0321782	0.174597	6	MGAT5B,MFSD11,SFRS2,C17orf95,JMJD6,Q00M93_CANFA
1405	TYo	4	6158712	6374026	215315	0.0322581	0.174905	3	MTR,ENSCAFG00000027180,ACTN2
1406	StP	15	30450888	30689509	238622	0.0325	0.174972	1	MGAT4C
1407	ShP	6	44728001	44966477	238477	0.0324324	0.174972	5	HBXIP,Q8WMF1_CANFA,SLC6A17,UBL4B,ALX3
1408	ShP	20	24876053	25113760	237708	0.0324324	0.174972	1	Q864F3_CANFA
1409	ShP	15	25173358	25410113	236756	0.0324324	0.174972	1	PPP1R12A
1410	ShP	6	24451753	24687326	235574	0.0324324	0.174972	2	RBBP6,CACNG3
1411	EBD	10	14663415	14898479	235065	0.032419	0.174972	2	RAB3IP,C12orf28
1412	EBD	2	50443893	50678447	234555	0.032419	0.174972	3	NDUFAF2,ENSCAFG00000027970,C5orf43
1413	ESt	7	16519369	16744762	225394	0.0325	0.174972	4	CEP350,QSOX1,ENSCAFG00000027746,LHX4
1414	ESt	21	23988521	24213847	225327	0.0325	0.174972	3	RSF1,ICLN_CANFA,AQP11
1415	JRT	22	24514870	24739947	225078	0.032419	0.174972	1
1416	CoS	7	6531284	6762769	231486	0.0328283	0.176614	1
1417	NSD	16	37526674	37781979	255306	0.0332481	0.178495	3	ENSCAFG00000006574,ENSCAFG00000025023,DUSP4
1418	NSD	13	51246757	51499946	253190	0.0332481	0.178495	3	ENSCAFG00000002200,ENSCAFG00000027026,KIAA1211
1419	Bgl	X	19912287	20156486	244200	0.0332481	0.178495	3	ENSCAFG00000026318,PDK3,PCYT1B
1420	Dac	28	27931693	28175480	243788	0.033419	0.179286	5	ENSCAFG00000027818,C10orf118,TDRD1,VWA2,AFAP1L2
1421	GRe	6	40624405	40874673	250269	0.0340314	0.17942	10	TRAP1,DNASE1,BTBD12,NLRC3,CLUAP1,C16orf90,NAT15,ZNF597,ZNF174,ZNF434
1422	GRe	22	21581353	21829717	248365	0.0340314	0.17942	2	ENSCAFG00000004941,ENSCAFG00000020868
1423	GRe	5	9812910	10056554	243645	0.0340314	0.17942	1
1424	GSl	20	33447844	33685586	237743	0.0335052	0.17942	1
1425	Eur	X	42356040	42593220	237181	0.0337662	0.17942	2	XM_850302.1,ENSCAFG00000015951
1426	Eur	X	65434321	65670612	236292	0.0337662	0.17942	2	SH3BGRL,ENSCAFG00000017358
1427	Eur	4	80934805	81170414	235610	0.0337662	0.17942	1	ENSCAFG00000027810
1428	BrS	19	20071298	20306168	234871	0.0337662	0.17942	3	ENSCAFG00000024724,ENSCAFG00000026772,ENSCAFG00000003988
1429	BrS	9	27168219	27402312	234094	0.0337662	0.17942	4	NPEPPS,KPNB1,TBKBP1,TBX21
1430	Eur	22	47535551	47769194	233644	0.0337662	0.17942	1	ENSCAFG00000005319
1431	Eur	12	46448335	46681774	233440	0.0337662	0.17942	6	UBE2CBP,DOPEY1,ENSCAFG00000027413,PGM3,RWDD2A,ME1
1432	BrS	1	30671468	30904893	233426	0.0337662	0.17942	2	ALDH8A1,HBS1L
1433	Sci	13	51246757	51480096	233340	0.0347395	0.17942	3	ENSCAFG00000002200,ENSCAFG00000027026,KIAA1211
1434	Sci	11	41210783	41443725	232943	0.0347395	0.17942	1	ENSCAFG00000024032
1435	BrS	6	49974800	50207512	232713	0.0337662	0.17942	1	RNPC3
1436	Sci	1	70352612	70584114	231503	0.0347395	0.17942	1
1437	BrS	6	7957181	8188256	231076	0.0337662	0.17942	1
1438	Wei	23	29014923	29244911	229989	0.0344828	0.17942	1	ENSCAFG00000023900
1439	Wei	13	4823169	5052198	229030	0.0344828	0.17942	5	VPS13B,ENSCAFG00000024078,XM_532281.2,ENSCAFG00000000532,FBXO43
1440	Wei	29	22328118	22556774	228657	0.0344828	0.17942	2	NCOA2,ENSCAFG00000020735
1441	Sci	13	31066269	31294801	228533	0.0347395	0.17942	1
1442	Wei	30	4064847	4292944	228098	0.0344828	0.17942	2	AVEN,RYR3
1443	Sci	2	3409177	3636692	227516	0.0347395	0.17942	2	ENSCAFG00000028129,ENSCAFG00000003667
1444	BMD	22	21306657	21531070	224414	0.0338164	0.17942	1
1445	BMD	10	23638368	23862706	224339	0.0338164	0.17942	6	RIBC2,SMC1B,FAM118A,UPK3A,ENSCAFG00000000846,ENSCAFG00000028252
1446	LRe	13	30488934	30710676	221743	0.0345679	0.17942	1
1447	LRe	3	45147303	45368222	220920	0.0345679	0.17942	1	ENSCAFG00000027994
1448	BMD	14	48126695	48347362	220668	0.0338164	0.17942	4	RP9,ENSCAFG00000003159,BBS9,ENSCAFG00000021472
1449	LRe	12	3033293	3253917	220625	0.0345679	0.17942	6	ENSCAFG00000011753,XM_532050.2,ENSCAFG00000000377,MED23,ENSCAFG00000021038,ARG1
1450	Elk	27	3218466	3438702	220237	0.0343137	0.17942	9	ENSCAFG00000006314,XM_543610.2,XM_843465.1,XM_843478.1,XM_543611.2,XM_543612.2,XM_543613.2,NEUROD4,KIAA0748
1451	LRe	2	17438652	17658864	220213	0.0345679	0.17942	2	EPC1,ENSCAFG00000027122
1452	LRe	6	39388193	39608196	220004	0.0345679	0.17942	9	XM_536983.2,XM_847803.1,XM_846393.1,ENSCAFG00000019118,C16orf89,NAGPA,SEC14L5,Q8SPS5_CANFA,UBN1
1453	BeT	16	36757892	36977256	219365	0.0341463	0.17942	1	RBPMS
1454	BeT	20	53348080	53566847	218768	0.0341463	0.17942	9	XM_848681.1,C19orf38,TMED1,DNM2,cfa-mir-199-1,QTRT1,ILF3,ENSCAFG00000026014,SLC44A2
1455	BoC	23	40707873	40925060	217188	0.0343137	0.17942	2	ATP1B3,TFDP2
1456	BoC	16	22206284	22422522	216239	0.0343137	0.17942	2	RNF32,LMBR1
1457	Dob	18	37615852	37830734	214883	0.0339806	0.17942	4	TCP11L1,DEPDC7,QSER1,PRRG4
1458	TYo	16	21628938	21843646	214709	0.0347395	0.17942	1
1459	TYo	X	86705916	86920404	214489	0.0347395	0.17942	3	ENSCAFG00000022649,ENSCAFG00000018104,CHRDL1
1460	TYo	7	44209271	44423642	214372	0.0347395	0.17942	12	HDGF,MRPL24,C1orf66,ISG20L2,CRABP2,NES,BCAN,HAPLN2,GPATCH4,APOA1BP,TTC24,IQGAP3
1461	TYo	17	15556836	15771099	214264	0.0347395	0.17942	1
1462	TYo	1	99169203	99383387	214185	0.0347395	0.17942	1
1463	TYo	9	55519178	55733175	213998	0.0347395	0.17942	2	MED27,ENSCAFG00000025881
1464	Rtw	18	6537083	6751027	213945	0.0342298	0.17942	1
1465	TYo	3	45594832	45808638	213807	0.0347395	0.17942	1
1466	TYo	1	83139892	83353534	213643	0.0347395	0.17942	1
1467	Rtw	24	26157008	26370499	213492	0.0342298	0.17942	5	RALY,ENSCAFG00000021644,EIF2S2,Q2LIQ4_CANFA,ENSCAFG00000024610
1468	Rtw	12	14162039	14374823	212785	0.0342298	0.17942	3	UBR2,PRPH2_CANFA,TBCC
1469	TYo	1	48791531	49003690	212160	0.0347395	0.17942	1	ENSCAFG00000027914
1470	TYo	6	28804181	29015864	211684	0.0347395	0.17942	4	TMC5,TMC7,COQ7,ITPRIPL2
1471	TYo	11	57032893	57244368	211476	0.0347395	0.17942	6	FRMPD1,RG9MTD3,EXOSC3,DCAF10,ENSCAFG00000002395,SHB
1472	TYo	7	46631663	46842856	211194	0.0347395	0.17942	1	SMAD2
1473	TYo	10	32017218	32228192	210975	0.0347395	0.17942	1	ISX
1474	TYo	10	16483223	16693407	210185	0.0347395	0.17942	2	B6EY12_CANFA,ENSCAFG00000000466
1475	TYo	3	17479547	17689693	210147	0.0347395	0.17942	2	MCTP1,ENSCAFG00000008034
1476	EBD	X	104550183	104782415	232233	0.0349127	0.179828	6	SLC25A14,GPR119,RBMX2,ENSCAFG00000018771,ENSCAFG00000018772,ENSCAFG00000018773
1477	EBD	18	7958203	8188588	230386	0.0349127	0.179828	1
1478	JRT	24	19961026	20184938	223913	0.0349127	0.179828	1
1479	JRT	22	22426497	22649486	222990	0.0349127	0.179828	1	ENSCAFG00000004942
1480	ESt	10	47548376	47772095	223720	0.035	0.180034	1	VWA3B
1481	ESt	16	11306425	11528155	221731	0.035	0.180034	6	NDUFB2,ADCK2,DENND2A,ENSCAFG00000022071,MKRN1,RAB19
1482	ShP	13	7344665	7580033	235369	0.0351351	0.180242	3	AZIN1,ENSCAFG00000000646,ATP6V1C1
1483	ShP	28	9164455	9397617	233163	0.0351351	0.180242	5	PPP1R3C,ENSCAFG00000007285,ENSCAFG00000007296,TNKS2,FGFBP3
1484	ShP	37	7095981	7327965	231985	0.0351351	0.180242	1
1485	ShP	10	17559638	17791566	231929	0.0351351	0.180242	1
1486	NFd	4	52004821	52224550	219730	0.0352645	0.180662	5	GABRG2,COX7A2,XM_849611.1,ENSCAFG00000017236,GABRA1
1487	NFd	1	53788646	54007821	219176	0.0352645	0.180662	2	ENSCAFG00000000769,ENSCAFG00000023890
1488	CoS	8	74402150	74631098	228949	0.0353535	0.180875	5	KLC1,XRCC3,ZFYVE21,PPP1R13B,ENSCAFG00000026149
1489	CoS	25	5517822	5745911	228090	0.0353535	0.180875	1	UFM1
1490	FSp	6	10470181	10704445	234265	0.0356234	0.182134	10	SRRM3,HSPB1_CANFA,YWHAG,SRCRB4D,ENSCAFG00000020969,ZP3_CANFA,DTX2,UPK3B,UPK3BL,ENSCAFG00000013668
1491	NSD	2	39503200	39754278	251079	0.0358056	0.182676	4	RELL2,PCDH1,KIAA0141,PCDH12
1492	NSD	11	51227832	51478375	250544	0.0358056	0.182676	1
1493	BoT	10	47737234	47980584	243351	0.0358974	0.182676	1	TMEM131
1494	BoT	27	26221262	26464342	243081	0.0358974	0.182676	1
1495	BoT	3	28607094	28849658	242565	0.0358974	0.182676	2	SSBP2,ACOT12
1496	BoT	7	57653635	57896011	242377	0.0358974	0.182676	6	ZNF396,ZNF24,ZNF397OS,ZNF397,ENSCAFG00000021769,MAPRE2
1497	Bgl	17	64865513	65105848	240336	0.0358056	0.182676	5	ENSCAFG00000013016,ENSCAFG00000023642,LELP1,PRR9,ENSCAFG00000023574
1498	GSl	36	3971830	4208362	236533	0.0360825	0.183129	1	GALNT13
1499	GSl	9	46990511	47225913	235403	0.0360825	0.183129	8	ABHD15,TP53I13,GIT1,ANKRD13B,CORO6,SSH2,ENSCAFG00000026323,ENSCAFG00000026094
1500	GSl	7	31759110	31994223	235114	0.0360825	0.183129	7	SCYL3,C1orf112,C1orf156,LYAM2_CANFA,SELL,Q28290_CANFA,ENSCAFG00000027460
1501	GSl	2	27165025	27399576	234552	0.0360825	0.183129	5	DHTKD1,ENSCAFG00000026422,XM_544258.2,ENSCAFG00000024529,C10orf47
1502	Eur	1	3535126	3767428	232303	0.0363636	0.183334	8	PARD6G,ENSCAFG00000000006,ADNP2,ENSCAFG00000012502,C18orf22,ENSCAFG00000023948,TXNL4A,PQLC1
1503	Eur	5	16490832	16720827	229996	0.0363636	0.183334	4	ENSCAFG00000020878,ARHGEF12,TMEM136,POU2F3
1504	Eur	25	7230870	7460739	229870	0.0363636	0.183334	4	SPG20,ENSCAFG00000006206,ENSCAFG00000027990,ENSCAFG00000024986
1505	Eur	13	4523040	4752645	229606	0.0363636	0.183334	3	VPS13B,cfa-mir-599,cfa-mir-875
1506	Eur	8	16688273	16917714	229442	0.0363636	0.183334	6	BAZ1A,XM_845497.1,SRP54_CANFA,FAM177A1,PPP2R3C,KIAA0391
1507	BrS	34	7399996	7628535	228540	0.0363636	0.183334	3	LOC479292,Q2ABE0_CANFA,ENSCAFG00000027684
1508	Eur	1	6948374	7176515	228142	0.0363636	0.183334	1
1509	BrS	16	7769478	7997352	227875	0.0363636	0.183334	1
1510	BrS	5	24294925	24521527	226603	0.0363636	0.183334	6	CRYAB,FDXACB1,ENSCAFG00000026111,PPP2R1B,SIK2,LAYN
1511	BrS	19	4820716	5046934	226219	0.0363636	0.183334	1
1512	Dob	31	4986680	5200387	213708	0.0364078	0.183435	2	CADM2,ENSCAFG00000027182
1513	BeT	14	11950679	12168744	218066	0.0365854	0.184051	2	GRM8,cfa-mir-592
1514	GoS	22	7304257	7521012	216756	0.0366748	0.184051	2	5HT2A_CANFA,ESD
1515	GoS	28	12690714	12906831	216118	0.0366748	0.184051	5	ENSCAFG00000021194,DNTT,OPALIN,TLL2,TM9SF3
1516	GoS	11	35674225	35890320	216096	0.0366748	0.184051	1
1517	GoS	9	62850710	63066454	215745	0.0366748	0.184051	3	STRBP,RABGAP1,ENSCAFG00000026021
1518	GoS	25	15762335	15977569	215235	0.0366748	0.184051	2	ENSCAFG00000027504,WASF3
1519	IrW	9	29031665	29260874	229210	0.0367647	0.184259	5	SPOP,SLC35B1,FAM117A,LOC611269,TAC4
1520	IrW	17	6039523	6268426	228904	0.0367647	0.184259	1
1521	Wei	18	6751027	6976604	225578	0.0369458	0.184802	1	ENSCAFG00000022310
1522	Wei	21	23988521	24213847	225327	0.0369458	0.184802	3	RSF1,ICLN_CANFA,AQP11
1523	Wei	18	3148801	3373157	224357	0.0369458	0.184802	1	ABCA13
1524	Gry	20	44122748	44354720	231973	0.0371287	0.185205	3	DHX30,SMARCC1,CSPG5
1525	Sci	5	25229580	25455890	226311	0.0372208	0.185205	3	ARHGAP20,ENSCAFG00000014234,ENSCAFG00000014235
1526	Sci	17	12777035	13001933	224899	0.0372208	0.185205	2	ENSCAFG00000003635,ENSCAFG00000003639
1527	Sci	38	17235775	17459982	224208	0.0372208	0.185205	1	ENSCAFG00000021604
1528	Sci	11	26298311	26522158	223848	0.0372208	0.185205	2	H2AFY,TIFAB
1529	GSh	21	11756704	11977173	220470	0.0372208	0.185205	1
1530	Sci	29	7770420	7989369	218950	0.0372208	0.185205	1
1531	Sci	X	105582477	105801351	218875	0.0372208	0.185205	6	ENSCAFG00000018811,ENSCAFG00000018815,ENSCAFG00000023138,ENSCAFG00000023137,ENSCAFG00000023108,OR13H1
1532	StP	22	21706142	21944502	238361	0.0375	0.185744	1	ENSCAFG00000020868
1533	StP	11	17929862	18167986	238125	0.0375	0.185744	2	ENSCAFG00000021243,ENSCAFG00000027126
1534	StP	27	10539062	10777000	237939	0.0375	0.185744	1	SLC38A4
1535	StP	16	7997352	8235202	237851	0.0375	0.185744	1
1536	EBD	3	82466086	82693577	227492	0.0374065	0.185744	1
1537	EBD	5	44461758	44689109	227352	0.0374065	0.185744	7	C17orf39,ATPAF2,LRRC48,TOM1L2,ENSCAFG00000024581,Q7YSA0_CANFA,cfa-mir-33b
1538	ESt	11	28388366	28607134	218769	0.0375	0.185744	7	KLHL3,ENSCAFG00000001129,ENSCAFG00000022881,HNRNPA0,ENSCAFG00000001135,MYOT,PKD2L2
1539	NFd	12	7432051	7649750	217700	0.0377834	0.186784	7	ZNF76,DEF6,PPARD_CANFA,FANCE,ENSCAFG00000001318,TEAD3,TULP1
1540	NFd	34	8847584	9064712	217129	0.0377834	0.186784	1
1541	NFd	12	33469112	33685708	216597	0.0377834	0.186784	1
1542	CoS	6	42133788	42358532	224745	0.0378788	0.187134	14	HAGH,IGFALS,NUBP2,SPSB3,EME2,MRPS34,NME3,MAPK8IP3,HN1L,CRAMP1L,XM_547195.2,TMEM204,ENSCAFG00000028007,TELO2
1543	FSp	10	53038303	53271395	233093	0.0381679	0.187832	2	ENSCAFG00000025640,ENSCAFG00000002672
1544	FSp	26	17345623	17578161	232539	0.0381679	0.187832	6	KSR2,RFC5,WSB2,VSIG10,PEBP1_CANFA,TAOK3
1545	FSp	25	4523552	4752645	229094	0.0381679	0.187832	1	ENSCAFG00000005998
1546	FSp	13	5950742	6179541	228800	0.0381679	0.187832	3	ZNF706,XM_539105.2,ENSCAFG00000026304
1547	FSp	22	15839858	16068314	228457	0.0381679	0.187832	1	ENSCAFG00000027105
1548	FSp	1	60839522	61067684	228163	0.0381679	0.187832	4	GOPC,Q09Y71_CANFA,NUS1,ENSCAFG00000023389
1549	NSD	27	45269581	45516107	246527	0.0383632	0.188185	6	IQSEC3,S6A12_CANFA,ENSCAFG00000020860,SLC6A13,KDM5A,CCDC77
1550	NSD	16	13830755	14076263	245509	0.0383632	0.188185	1	DGKI
1551	NSD	11	39101990	39347230	245241	0.0383632	0.188185	1	C9orf93
1552	NSD	16	23450055	23692528	242474	0.0383632	0.188185	2	NCAPG2,ESYT2
1553	NSD	16	37107352	37349053	241702	0.0383632	0.188185	3	LEPROTL1,TMEM66,ENSCAFG00000006566
1554	BoT	13	41986813	42226360	239548	0.0384615	0.188546	3	TMEM33,SLC30A9,BEND4
1555	GRe	2	85612033	85854708	242676	0.039267	0.188849	1
1556	GRe	15	31946814	32188614	241801	0.039267	0.188849	1	C12orf50
1557	GRe	14	37057761	37296599	238839	0.039267	0.188849	2	MACC1,ENSCAFG00000026121
1558	Dac	19	34166974	34402960	235987	0.0385604	0.188849	2	ENSCAFG00000004917,ENSCAFG00000004919
1559	GRe	30	3008317	3244052	235736	0.039267	0.188849	7	ENSCAFG00000014097,OR4K2,OR4K5,ENSCAFG00000024256,OR4K15,OR4F15,XM_544580.2
1560	GRe	4	26210011	26445730	235720	0.039267	0.188849	2	CBARA1,ENSCAFG00000027212
1561	GSl	25	33845842	34077947	232106	0.0386598	0.188849	2	DPYSL2,PNMA2
1562	Eur	4	44007771	44233369	225599	0.038961	0.188849	3	TLX3,XM_536433.2,ENSCAFG00000028116
1563	BrS	8	50909877	51132057	222181	0.038961	0.188849	5	YLPM1,PROX2,DLST,RPS6KL1,PGF
1564	BrS	9	28991695	29213439	221745	0.038961	0.188849	6	NXPH3,SPOP,SLC35B1,FAM117A,LOC611269,TAC4
1565	Elk	12	32637345	32855746	218402	0.0392157	0.188849	1
1566	Elk	32	21493562	21710219	216658	0.0392157	0.188849	1
1567	BeT	3	51953845	52170087	216243	0.0390244	0.188849	1	AKAP13
1568	BeT	12	60747474	60963692	216219	0.0390244	0.188849	3	CCNC,PRDM13,ENSCAFG00000021696
1569	BeT	23	35093250	35308851	215602	0.0390244	0.188849	1
1570	BMD	3	55883084	56098529	215446	0.0386473	0.188849	9	ZNF710,IDH2,ENSCAFG00000012062,SEMA4B,CIB1,XM_536194.2,TTLL13,ENSCAFG00000012103,VPS33B
1571	BeT	20	5472180	5687113	214934	0.0390244	0.188849	3	GATA2,ENSCAFG00000004144,RPN1
1572	BMD	20	5472180	5687113	214934	0.0386473	0.188849	3	GATA2,ENSCAFG00000004144,RPN1
1573	BoC	37	9514605	9729121	214517	0.0392157	0.188849	1	ANKRD44
1574	GoS	8	24352065	24565941	213877	0.0391198	0.188849	1
1575	BoC	11	25727796	25941449	213654	0.0392157	0.188849	6	SAR1B,SEC24A,ENSCAFG00000001039,CAMLG,DDX46,C5orf24
1576	GoS	11	50534693	50747224	212532	0.0391198	0.188849	1	ENSCAFG00000001734
1577	BoC	16	23926737	24138669	211933	0.0392157	0.188849	1	VIPR2
1578	GoS	11	72227517	72438807	211291	0.0391198	0.188849	1	XM_850348.1
1579	Dob	2	75760425	75971485	211061	0.038835	0.188849	8	WASF2,XM_544470.1,CD164L2,MAP3K6,SYTL1,TMEM222,WDTC1,Q9GK59_CANFA
1580	Dob	30	42366556	42577509	210954	0.038835	0.188849	1	SCAPER
1581	Dob	3	72425599	72636084	210486	0.038835	0.188849	6	DRD5,OTOP1,TMEM128,ENSCAFG00000015675,ZNF509,NSG1
1582	Dob	11	28651487	28861743	210257	0.038835	0.188849	7	FAM13B,WNT8A,NME5,ENSCAFG00000001165,BRD8,KIF20A,CDC23
1583	Dob	26	9082989	9292941	209953	0.038835	0.188849	6	RILPL1,SNRNP35,ENSCAFG00000007488,RILPL2,ENSCAFG00000007493,SBNO1
1584	Dob	3	10902363	11111795	209433	0.038835	0.188849	3	HISPPD1,GIN1,PAM
1585	Wei	14	37335571	37558241	222671	0.0394089	0.189172	1	ITGB8
1586	Wei	10	48873222	49092792	219571	0.0394089	0.189172	3	ZFP36L2,THADA_CANFA,ENSCAFG00000027631
1587	Wei	19	23415620	23635125	219506	0.0394089	0.189172	6	ENSCAFG00000004202,ENSCAFG00000022684,FAM123C,ENSCAFG00000004207,ENSCAFG00000027456,ENSCAFG00000004209
1588	LRe	11	61951273	62170805	219533	0.0395062	0.189401	1	ENSCAFG00000027758
1589	LRe	7	30280156	30498422	218267	0.0395062	0.189401	3	MYOC_CANFA,BAT2D1,ENSCAFG00000026140
1590	TYo	19	52944957	53154584	209628	0.0397022	0.190221	1	ENSCAFG00000005529
1591	EBD	5	31529995	31754419	224425	0.0399002	0.19093	3	DYNC2H1,VDAC1,DCUN1D5
1592	EBD	18	3148801	3373157	224357	0.0399002	0.19093	1	ABCA13
1593	StP	7	14833073	15069141	236069	0.04	0.191287	1	PROX1
1594	NFd	26	12212473	12427897	215425	0.0403023	0.192611	7	BRAP,ACAD10,XM_848521.1,LOC611711,ENSCAFG00000026405,MAPKAPK5,ENSCAFG00000026327
1595	CoS	12	36128120	36351966	223847	0.040404	0.192977	2	A1EAA2_CANFA,B3GA2_CANFA
1596	FSp	30	23686716	23909392	222677	0.0407125	0.194206	5	ENSCAFG00000027979,CCPG1,cfa-mir-628,DYX1C1,PYGO1
1597	FSp	5	5362514	5583551	221038	0.0407125	0.194206	3	SF3A1,ENSCAFG00000023789,ENSCAFG00000009842
1598	NSD	7	24278702	24517449	238748	0.0409207	0.194982	1	RASAL2
1599	Dac	11	57184707	57419846	235140	0.0411311	0.194982	3	ENSCAFG00000002395,SHB,ENSCAFG00000028415
1600	Dac	9	32992759	33226373	233615	0.0411311	0.194982	1
1601	Dac	4	41202335	41435923	233589	0.0411311	0.194982	1
1602	Dac	18	33283984	33515744	231761	0.0411311	0.194982	1
1603	Dac	1	70352612	70584114	231503	0.0411311	0.194982	1
1604	Dac	11	49237846	49468345	230500	0.0411311	0.194982	1
1605	Dac	1	48688468	48917562	229095	0.0411311	0.194982	1	ENSCAFG00000027914
1606	BMD	18	4937944	5151482	213539	0.0410628	0.194982	1
1607	BMD	22	22832055	23044830	212776	0.0410628	0.194982	1
1608	GSl	5	6600112	6822191	222080	0.0412371	0.195239	2	ENSCAFG00000021116,ENSCAFG00000026662
1609	GSl	25	11697692	11918373	220682	0.0412371	0.195239	2	XM_534514.2,B3GALTL
1610	Dob	32	23202480	23411115	208636	0.0412621	0.195239	3	C4orf37,ENSCAFG00000027888,ENSCAFG00000010248
1611	GRe	X	101703081	101936620	233540	0.0418848	0.19559	1	ENSCAFG00000007926
1612	Gry	5	9429066	9655372	226307	0.0420792	0.19559	1
1613	IrW	13	15234045	15459715	225671	0.0416667	0.19559	2	ENSCAFG00000000754,CSMD3
1614	Gry	21	23988521	24213847	225327	0.0420792	0.19559	3	RSF1,ICLN_CANFA,AQP11
1615	Gry	31	26996580	27221493	224914	0.0420792	0.19559	6	RNF160,RWDD2B,USP16,CCT8,ENSCAFG00000008721,C21orf7
1616	Eur	5	44847121	45069181	222061	0.0415584	0.19559	5	PEMT,ENSCAFG00000026606,ENSCAFG00000018534,RASD1,MED9
1617	Eur	22	38768541	38988993	220453	0.0415584	0.19559	1
1618	Eur	2	10483763	10704210	220448	0.0415584	0.19559	2	MYO3A,ENSCAFG00000022978
1619	BrS	13	47986262	48206383	220122	0.0415584	0.19559	1
1620	Eur	22	33705367	33925461	220095	0.0415584	0.19559	1	MYCBP2
1621	Eur	26	26263395	26483365	219971	0.0415584	0.19559	6	HORMAD2,ENSCAFG00000027109,Q8MJB4_CANFA,OSM,GATSL3,ENSCAFG00000012514
1622	Wei	1	81793228	82010933	217706	0.0418719	0.19559	1
1623	Sci	5	9775791	9993114	217324	0.0421836	0.19559	1
1624	Sci	32	8168425	8385378	216954	0.0421836	0.19559	2	BMP3,PRKG2
1625	Sci	12	26093041	26308263	215223	0.0421836	0.19559	1	BMP5
1626	Sci	35	8515439	8730289	214851	0.0421836	0.19559	2	ENSCAFG00000009483,ENSCAFG00000025155
1627	Sci	20	15321807	15536562	214756	0.0421836	0.19559	4	ENSCAFG00000005604,EDEM1,ARL8B,ENSCAFG00000028104
1628	Sci	10	14587412	14801680	214269	0.0421836	0.19559	3	BEST3,RAB3IP,C12orf28
1629	Sci	18	6537083	6751027	213945	0.0421836	0.19559	1
1630	Sci	4	20463384	20677229	213846	0.0421836	0.19559	1	XM_844561.1
1631	Sci	6	44545121	44758787	213667	0.0421836	0.19559	7	XM_547232.2,XM_547233.1,PROK1,HBXIP,SLC16A4,RBM15,ENSCAFG00000028436
1632	BeT	22	22832055	23044830	212776	0.0414634	0.19559	1
1633	Sci	11	50534693	50747224	212532	0.0421836	0.19559	1	ENSCAFG00000001734
1634	Sci	15	49144884	49357128	212245	0.0421836	0.19559	1	ARHGAP10
1635	Sci	4	9810420	10021791	211372	0.0421836	0.19559	1	KIAA1383
1636	Sci	19	9419784	9630978	211195	0.0421836	0.19559	1
1637	BoC	11	36904484	37115610	211127	0.0416667	0.19559	1
1638	BoC	6	27079201	27290070	210870	0.0416667	0.19559	5	XM_547099.2,CRYM,ANKS4B,ZP2_CANFA,TMEM159
1639	GoS	4	83249993	83460561	210569	0.0415648	0.19559	1
1640	TYo	27	26173018	26381827	208810	0.0421836	0.19559	1
1641	TYo	27	30753591	30962114	208524	0.0421836	0.19559	2	ENSCAFG00000026090,PLEKHA5
1642	TYo	15	41001729	41210202	208474	0.0421836	0.19559	7	XM_532660.2,ENSCAFG00000026374,IKBIP,APAF_CANFA,ENSCAFG00000026384,ANKS1B,ENSCAFG00000006667
1643	TYo	25	4828638	5036578	207941	0.0421836	0.19559	2	NHLRC3,C13orf23
1644	EBD	30	33119448	33342985	223538	0.042394	0.196208	2	RB11A_CANFA,MEGF11
1645	JRT	9	56094217	56315572	221356	0.042394	0.196208	6	PPAPDC3,FAM78A,NUP214,ENSCAFG00000021075,AIF1L,LAMC3
1646	JRT	14	11087016	11307498	220483	0.042394	0.196208	3	cfa-mir-129-1,SND1,LRRC4
1647	CoS	20	57782036	58003329	221294	0.0429293	0.197009	7	UHRF1,ARRDC5,PLIN3,TICAM1,FEM1A,cfa-mir-7-3,DPP9
1648	CoS	12	5622709	5843592	220884	0.0429293	0.197009	19	Q5TJG2_CANFA,RXRB_CANFA,S39A7_CANFA,DHB8_CANFA,cfa-mir-219-1,RING1_CANFA,VPS52_CANFA,RS18_CANFA,ENSCAFG00000000952,WDR46_CANFA,PFD6_CANFA,RGL2_CANFA,TPSN_CANFA,ZBT22_CANFA,DAXX_CANFA,KIFC1,PHF1,CUTA,SYNGAP1
1649	CoS	7	37351557	37571596	220040	0.0429293	0.197009	1	SDCCAG8
1650	CoS	3	64100410	64320192	219783	0.0429293	0.197009	8	GRK4,ENSCAFG00000014715,NOP14,TETRAN,ADD1,ENSCAFG00000014824,ENSCAFG00000028181,SH3BP2
1651	CoS	6	40624405	40843242	218838	0.0429293	0.197009	8	TRAP1,DNASE1,BTBD12,NLRC3,CLUAP1,C16orf90,NAT15,ZNF597
1652	CoS	2	56041364	56259640	218277	0.0429293	0.197009	1
1653	CoS	24	12101184	12318491	217308	0.0429293	0.197009	1	ENSCAFG00000003497
1654	CoS	26	15710112	15925650	215539	0.0429293	0.197009	1	MED13L
1655	CoS	11	15467534	15682912	215379	0.0429293	0.197009	2	ENSCAFG00000008899,SNX2
1656	NFd	16	21628938	21843646	214709	0.0428212	0.197009	1
1657	NFd	9	45668492	45883160	214669	0.0428212	0.197009	4	NLK,ENSCAFG00000028000,ENSCAFG00000020788,ENSCAFG00000023171
1658	CoS	12	6238545	6453072	214528	0.0429293	0.197009	2	ENSCAFG00000024506,GRM4
1659	NFd	5	35056533	35270649	214117	0.0428212	0.197009	18	SLC16A13,SLC16A11,ENSCAFG00000015980,ASGR2,ASGR1,DLG4,ACADVL,cfa-mir-324,DVL2,PHF23,GABARAP,DULLARD,C17orf81,CLDN7,GTR4_CANFA,YBX2,EIF5A,GPS2
1660	CoS	5	4314822	4528783	213962	0.0429293	0.197009	1	SPATA19
1661	ShP	6	46286303	46513276	226974	0.0432432	0.197854	3	ENSCAFG00000023303,SLC25A24,ENSCAFG00000023238
1662	ShP	10	27807343	28028909	221567	0.0432432	0.197854	4	MKL1,SGSM3,ADSL,TNRC6B
1663	ShP	7	48698527	48919908	221382	0.0432432	0.197854	1
1664	ShP	10	57729486	57950063	220578	0.0432432	0.197854	2	ASB3,CHAC2
1665	ShP	6	6145173	6365646	220474	0.0432432	0.197854	1	ENSCAFG00000023213
1666	NSD	21	7248747	7487293	238547	0.0434783	0.19786	1	XM_543064.2
1667	NSD	24	3783384	4021146	237763	0.0434783	0.19786	4	XM_542863.2,ENSCAFG00000026706,ENSCAFG00000005162,FOXA2
1668	Bgl	4	20403326	20641019	237694	0.0434783	0.19786	1	XM_844561.1
1669	NSD	22	29213232	29442271	229040	0.0434783	0.19786	1
1670	NSD	22	25935735	26163105	227371	0.0434783	0.19786	1	ENSCAFG00000026838
1671	NSD	34	19376470	19603393	226924	0.0434783	0.19786	9	ENSCAFG00000026135,ENSCAFG00000028363,ENSCAFG00000026396,ENSCAFG00000027502,KLHL6,ENSCAFG00000027569,ENSCAFG00000027745,ENSCAFG00000011837,KLHL24
1672	NSD	20	5183347	5409204	225858	0.0434783	0.19786	1	EEFSEC
1673	BMD	23	13913510	14122174	208665	0.0434783	0.19786	2	ENSCAFG00000005216,XP_850328.1
1674	BMD	1	117116691	117325090	208400	0.0434783	0.19786	10	NFKBIB,SIRT2,RINL,ENSCAFG00000005652,ECH1,LGALS4,ENSCAFG00000024191,ENSCAFG00000005678,CAPN12,ACTN4
1675	BoT	20	56854076	57090811	236736	0.0435897	0.198167	4	MLLT1,ACSBG2,RFX2,RANBP3
1676	Dac	26	12212473	12438210	225738	0.0437018	0.198167	7	BRAP,ACAD10,XM_848521.1,LOC611711,ENSCAFG00000026405,MAPKAPK5,ENSCAFG00000026327
1677	Dac	3	46147426	46372543	225118	0.0437018	0.198167	1
1678	Dac	9	34552058	34776466	224409	0.0437018	0.198167	2	ANKFN1,ENSCAFG00000017375
1679	Dac	16	53140048	53363810	223763	0.0437018	0.198167	1
1680	Dob	2	64738682	64946640	207959	0.0436893	0.198167	1	FTO
1681	StP	30	42042798	42277518	234721	0.045	0.199424	3	ENSCAFG00000025255,TSPAN3,PSTPIP1
1682	StP	5	36866416	37099612	233197	0.045	0.199424	2	STX8,WDR16
1683	StP	1	23974550	24205870	231321	0.045	0.199424	4	C18orf54,ENSCAFG00000024276,STARD6,POLI
1684	GRe	20	44671609	44902271	230663	0.0445026	0.199424	6	SETD2,ENSCAFG00000023946,XM_846454.1,NBEAL2,CCDC12,ENSCAFG00000022315
1685	StP	5	34490530	34720473	229944	0.045	0.199424	13	ENO3,ENSCAFG00000027830,C17orf87,KIF1C,INCA1,CAMTA2,SPAG7,PFN1,RNF167,SLC25A11,ENSCAFG00000023813,Q8MI40_CANFA,Q8MJY0_CANFA
1686	StP	5	29098927	29328486	229560	0.045	0.199424	4	AASDHPPT,KBTBD3,KIAA1826,GRIA4
1687	StP	11	63038471	63267171	228701	0.045	0.199424	2	ENSCAFG00000021729,SMC2
1688	StP	2	39564361	39792797	228437	0.045	0.199424	6	RELL2,PCDH1,KIAA0141,PCDH12,RNF14,GNPDA1
1689	StP	24	21175444	21403827	228384	0.045	0.199424	5	Q8SPU9_CANFA,OXT,MRPS26,PTPRA,VPS16
1690	StP	5	78966981	79191510	224530	0.045	0.199424	3	RFWD3,GLG1,ENSCAFG00000009192
1691	EBD	10	9933314	10155349	222036	0.0448878	0.199424	6	C12orf56,XPOT,TBK1,,C12orf66,ENSCAFG00000026334
1692	EBD	4	77676501	77898476	221976	0.0448878	0.199424	1
1693	Gry	16	8708820	8929778	220959	0.0445545	0.199424	11	XM_851082.1,OR2A2,XM_548563.2,Q6W6T8_CANFA,Q6W6U8_CANFA,OR2A25,Q28305_CANFA,OR6B1,XM_845733.1,Q70ZB3_CANFA,XM_539842.2
1694	Gry	11	57224260	57444886	220627	0.0445545	0.199424	2	SHB,ENSCAFG00000028415
1695	StP	27	37593750	37814333	220584	0.045	0.199424	7	ETV6,ENSCAFG00000013376,ENSCAFG00000025975,Q2ABC7_CANFA,Q2ABC6_CANFA,ENSCAFG00000013377,Q2ABC8_CANFA
1696	JRT	22	33705367	33925461	220095	0.0448878	0.199424	1	MYCBP2
1697	StP	37	8096292	8316305	220014	0.045	0.199424	1
1698	BrS	3	66024768	66243437	218670	0.0441558	0.199424	1
1699	GSh	14	11950679	12168744	218066	0.044665	0.199424	2	GRM8,cfa-mir-592
1700	JRT	9	48418528	48636545	218018	0.0448878	0.199424	3	VPS53,FAM101B,C17orf97
1701	JRT	8	32183184	32399874	216691	0.0448878	0.199424	1	DDHD1
1702	LRe	19	20071298	20287288	215991	0.0444444	0.199424	3	ENSCAFG00000024724,ENSCAFG00000026772,ENSCAFG00000003988
1703	JRT	2	51284754	51500608	215855	0.0448878	0.199424	1	XM_855285.1
1704	LRe	11	8156137	8371974	215838	0.0444444	0.199424	2	FEM1C,TMED7-TICAM2
1705	JRT	29	42370297	42585807	215511	0.0448878	0.199424	5	ENSCAFG00000021510,DPY19L4,INTS8,CCNE2,TP53INP1
1706	ESt	23	33413056	33628514	215459	0.045	0.199424	3	BFSP2,CDV3,TOPBP1
1707	Elk	X	86705916	86920404	214489	0.0441176	0.199424	3	ENSCAFG00000022649,ENSCAFG00000018104,CHRDL1
1708	ESt	1	6992021	7206152	214132	0.045	0.199424	1
1709	LRe	13	58140218	58354306	214089	0.0444444	0.199424	1	TECRL
1710	Elk	19	15395096	15609090	213995	0.0441176	0.199424	1
1711	JRT	22	52611442	52825269	213828	0.0448878	0.199424	2	ENSCAFG00000005833,CLYBL
1712	LRe	24	26157008	26370499	213492	0.0444444	0.199424	5	RALY,ENSCAFG00000021644,EIF2S2,Q2LIQ4_CANFA,ENSCAFG00000024610
1713	LRe	14	53467700	53681140	213441	0.0444444	0.199424	1	ENSCAFG00000020769
1714	LRe	34	3538414	3751669	213256	0.0444444	0.199424	1	ENSCAFG00000020846
1715	ESt	3	53326168	53538925	212758	0.045	0.199424	1
1716	ESt	11	50534693	50747224	212532	0.045	0.199424	1	ENSCAFG00000001734
1717	Sci	27	46937382	47147855	210474	0.044665	0.199424	4	XM_534930.2,DCP1B,ENSCAFG00000015998,XM_543884.2
1718	BoC	11	28651487	28861743	210257	0.0441176	0.199424	7	FAM13B,WNT8A,NME5,ENSCAFG00000001165,BRD8,KIF20A,CDC23
1719	BoC	21	23837695	24046878	209184	0.0441176	0.199424	5	LOC607573,ENSCAFG00000004857,C11orf67,ENSCAFG00000011455,RSF1
1720	NFd	22	3229033	3442199	213167	0.0453401	0.200814	1	WDFY2
1721	CoS	1	24917974	25130763	212790	0.0454545	0.201204	2	DCC,ENSCAFG00000027951
1722	BoT	19	15426261	15660436	234176	0.0461538	0.202822	1
1723	Bgl	13	51246757	51480096	233340	0.0460358	0.202822	3	ENSCAFG00000002200,ENSCAFG00000027026,KIAA1211
1724	Bgl	24	5292617	5524041	231425	0.0460358	0.202822	3	ENSCAFG00000005214,ENSCAFG00000005232,ENSCAFG00000027317
1725	Bgl	17	6039523	6268426	228904	0.0460358	0.202822	1
1726	NSD	4	83151392	83374193	222802	0.0460358	0.202822	1
1727	Dac	12	37134630	37356426	221797	0.0462725	0.202822	1	ENSCAFG00000024293
1728	Dac	9	28991695	29213439	221745	0.0462725	0.202822	6	NXPH3,SPOP,SLC35B1,FAM117A,LOC611269,TAC4
1729	Dac	11	26332457	26553130	220674	0.0462725	0.202822	2	H2AFY,TIFAB
1730	ShP	6	14471843	14691184	219342	0.0459459	0.202822	4	EIF2AK1,ENSCAFG00000015678,USP42,CYTH3
1731	ShP	25	10387880	10607038	219159	0.0459459	0.202822	3	PDS5B,ENSCAFG00000006373,ENSCAFG00000006376
1732	Dac	X	105582477	105801351	218875	0.0462725	0.202822	6	ENSCAFG00000018811,ENSCAFG00000018815,ENSCAFG00000023138,ENSCAFG00000023137,ENSCAFG00000023108,OR13H1
1733	Dac	30	11558760	11776352	217593	0.0462725	0.202822	3	RPAP1,TYRO3,MGA
1734	ShP	4	47900707	48118168	217462	0.0459459	0.202822	1
1735	Dob	11	51103203	51310429	207227	0.0461165	0.202822	1	ENSCAFG00000001739
1736	Dob	1	109792171	109999293	207123	0.0461165	0.202822	20	PRR12,PRRG2,NOSIP,RCN3,Q9XSU4_CANFA,FCGRT,cfa-mir-150,ENSCAFG00000021944,NP_001003350.1,ENSCAFG00000025861,ENSCAFG00000026335,ENSCAFG00000022178,ENSCAFG00000025994,ALDH16A1,PIH1D1,SLC17A7,PTH2,CCDC155,ENSCAFG00000027900,DKKL1
1737	Dob	7	26059833	26266918	207086	0.0461165	0.202822	3	XM_547452.2,ENSCAFG00000023760,ENSCAFG00000021016
1738	Dob	34	29286833	29493214	206382	0.0461165	0.202822	5	ENSCAFG00000014222,KPNA4,SMC4,cfa-mir-15b,cfa-mir-16-2
1739	GSl	7	68731883	68947857	215975	0.0463918	0.202994	1
1740	GSl	18	10729318	10944037	214720	0.0463918	0.202994	1	ENSCAFG00000025197
1741	GSl	9	45668492	45883160	214669	0.0463918	0.202994	4	NLK,ENSCAFG00000028000,ENSCAFG00000020788,ENSCAFG00000023171
1742	Elk	11	57329046	57541047	212002	0.0465686	0.203534	3	SHB,ENSCAFG00000002399,ENSCAFG00000021920
1743	Elk	20	42975776	43186867	211092	0.0465686	0.203534	17	CCDC36,ENSCAFG00000026418,XM_846001.1,KLHDC8B,CCDC71,LAMB2,LOC608909,QARS,QRICH1,IMPDH2,NDUFAF3,cfa-mir-191,cfa-mir-425,DALRD3,WDR6,P4HTM,ARIH2
1744	Wei	1	73869307	74084996	215690	0.046798	0.203835	4	ENSCAFG00000001219,ENSCAFG00000020988,C9orf102,ENSCAFG00000025903
1745	BrS	8	66931756	67146961	215206	0.0467532	0.203835	2	DICER1,CLMN
1746	Wei	14	10228887	10444080	215194	0.046798	0.203835	2	FAM40B,AHCYL2
1747	BrS	36	11286067	11501040	214974	0.0467532	0.203835	1
1748	BrS	1	31977501	32192404	214904	0.0467532	0.203835	2	MAP7,MAP3K5
1749	Wei	1	53822279	54035486	213208	0.046798	0.203835	1	ENSCAFG00000023890
1750	GRe	2	62271859	62500174	228316	0.0471204	0.203953	6	HERPUD1,SLC12A3,cfa-mir-138b,NUP93,MT1_CANFA,MT2_CANFA
1751	GRe	2	88065174	88292325	227152	0.0471204	0.203953	2	CASZ1,PEX14
1752	GRe	34	12224481	12450981	226501	0.0471204	0.203953	1
1753	GRe	10	68340072	68564897	224826	0.0471204	0.203953	1
1754	GRe	22	38768541	38988993	220453	0.0471204	0.203953	1
1755	GRe	21	27451483	27671720	220238	0.0471204	0.203953	2	XM_856012.1,PLEKHB1
1756	Gry	5	82435953	82654371	218419	0.0470297	0.203953	1
1757	LRe	6	28804181	29015864	211684	0.0469136	0.203953	4	TMC5,TMC7,COQ7,ITPRIPL2
1758	LRe	18	13234016	13445417	211402	0.0469136	0.203953	1	POU6F2
1759	Sci	11	28651487	28861743	210257	0.0471464	0.203953	7	FAM13B,WNT8A,NME5,ENSCAFG00000001165,BRD8,KIF20A,CDC23
1760	Sci	17	15788909	15998903	209995	0.0471464	0.203953	1
1761	Sci	27	30753591	30962114	208524	0.0471464	0.203953	2	ENSCAFG00000026090,PLEKHA5
1762	ESt	6	27079201	27290070	210870	0.0475	0.205366	5	XM_547099.2,CRYM,ANKS4B,ZP2_CANFA,TMEM159
1763	NFd	5	50168752	50381560	212809	0.0478589	0.206566	1	ATG4C
1764	NFd	2	50231171	50443893	212723	0.0478589	0.206566	4	DEPDC1B,ELOVL7,ERCC8,NDUFAF2
1765	NFd	6	14756898	14969381	212484	0.0478589	0.206566	8	RAC1_CANFA,DAGLB,KDELR2,ENSCAFG00000028229,GRID2IP,ENSCAFG00000027082,ZDHHC4,C7orf26
1766	CoS	6	28804181	29015864	211684	0.0479798	0.206853	4	TMC5,TMC7,COQ7,ITPRIPL2
1767	CoS	14	36994624	37206024	211401	0.0479798	0.206853	1	MACC1
1768	FSp	18	32335423	32551661	216239	0.0483461	0.207844	1
1769	FSp	20	5472180	5687113	214934	0.0483461	0.207844	3	GATA2,ENSCAFG00000004144,RPN1
1770	FSp	7	44846927	45061521	214595	0.0483461	0.207844	9	KIAA0907,ENSCAFG00000027646,ENSCAFG00000026285,RIT1,SYT11,XM_547544.2,MSTO1,DAP3,ASH1L
1771	FSp	10	10907439	11121003	213565	0.0483461	0.207844	2	MSRB3,ENSCAFG00000027222
1772	FSp	5	35139762	35352729	212968	0.0483461	0.207844	25	ASGR1,DLG4,ACADVL,cfa-mir-324,DVL2,PHF23,GABARAP,DULLARD,C17orf81,CLDN7,GTR4_CANFA,YBX2,EIF5A,GPS2,NEURL4,ENSCAFG00000016156,ACAP1,KCTD11,TMEM95,TNK1,PLSCR3,C17orf61,NLGN2,SPEM1,C17orf74
1773	BoT	20	8062542	8290467	227926	0.0487179	0.207995	5	NR2C2,MRPS25,ZFYVE20,TRH,ENSCAFG00000004589
1774	BoT	25	14899294	15127163	227870	0.0487179	0.207995	2	POLR1D,LNX2
1775	BoT	34	19376470	19603393	226924	0.0487179	0.207995	9	ENSCAFG00000026135,ENSCAFG00000028363,ENSCAFG00000026396,ENSCAFG00000027502,KLHL6,ENSCAFG00000027569,ENSCAFG00000027745,ENSCAFG00000011837,KLHL24
1776	BoT	20	5183347	5409204	225858	0.0487179	0.207995	1	EEFSEC
1777	BoT	21	23988521	24213847	225327	0.0487179	0.207995	3	RSF1,ICLN_CANFA,AQP11
1778	BoT	28	17420443	17645227	224785	0.0487179	0.207995	6	Q7JGZ5_CANFA,ENSCAFG00000028383,ENSCAFG00000021209,C10orf76,RPL37A,HPS6
1779	Bgl	14	36083347	36307851	224505	0.0485934	0.207995	1	HDAC9
1780	NSD	11	47773990	47994938	220949	0.0485934	0.207995	1	ENSCAFG00000028361
1781	Bgl	12	36085992	36306411	220420	0.0485934	0.207995	4	C6orf57,ENSCAFG00000002604,ENSCAFG00000002606,A1EAA2_CANFA
1782	NSD	11	44660715	44880612	219898	0.0485934	0.207995	1
1783	Bgl	12	30963530	31181852	218323	0.0485934	0.207995	1	ENSCAFG00000002497
1784	Dac	20	49695453	49912096	216644	0.0488432	0.207995	7	CYP4F22,PGLYRP2,RASAL3,WIZ,AKAP8L,AKAP8_CANFA,BRD4
1785	Dac	11	61057312	61273637	216326	0.0488432	0.207995	9	ENSCAFG00000002586,XM_848293.1,BAAT,MRPL50,ZNF189,ALDOB,C9orf125,ENSCAFG00000027458,RNF20
1786	Dac	26	15710112	15925650	215539	0.0488432	0.207995	1	MED13L
1787	Dac	2	24732486	24947750	215265	0.0488432	0.207995	1	FAM107B
1788	Dac	29	25249643	25464625	214983	0.0488432	0.207995	6	STAU2,ENSCAFG00000021562,UBE2W,ENSCAFG00000008135,TCEB1,ENSCAFG00000025985
1789	GoS	11	49361096	49568709	207614	0.0488998	0.207995	1	ENSCAFG00000009589
1790	Rtw	15	41608211	41815031	206821	0.0488998	0.207995	2	ANKS1B,ENSCAFG00000023633
1791	Rtw	12	19545017	19751759	206743	0.0488998	0.207995	1
1792	Elk	11	28651487	28861743	210257	0.0490196	0.208388	7	FAM13B,WNT8A,NME5,ENSCAFG00000001165,BRD8,KIF20A,CDC23
1793	Eur	14	10228887	10444080	215194	0.0493506	0.208979	2	FAM40B,AHCYL2
1794	Eur	6	54723409	54938312	214904	0.0493506	0.208979	1	ENSCAFG00000026884
1795	Eur	2	5964290	6179131	214842	0.0493506	0.208979	1
1796	BrS	25	16746828	16961244	214417	0.0493506	0.208979	1	ENSCAFG00000025477
1797	BrS	18	14982699	15196649	213951	0.0493506	0.208979	5	SFRP4,ENSCAFG00000003652,ENSCAFG00000003656,ENSCAFG00000025326,PNPLA8
1798	BrS	X	81851754	82065460	213707	0.0493506	0.208979	1
1799	BrS	28	6717707	6930561	212855	0.0493506	0.208979	2	RASGEF1A,CSGALNACT2
1800	Gry	1	78743670	78960251	216582	0.049505	0.209516	5	GKAP1,UBQLN1,C9orf103,ENSCAFG00000022609,ENSCAFG00000023649
1801	GSh	21	8205285	8422641	217357	0.0496278	0.209686	5	MTMR2,ENSCAFG00000026871,ENSCAFG00000013802,CEP57,FAM76B
1802	Sci	26	27699306	27907379	208074	0.0496278	0.209686	4	DEPDC5,ENSCAFG00000013310,YWHAH,ENSCAFG00000013339
1803	Sci	21	24381850	24589215	207366	0.0496278	0.209686	4	PAK1,GDPD4,ENSCAFG00000025150,ENSCAFG00000005074
1804	JRT	6	14573662	14785359	211698	0.0498753	0.210615	5	CYTH3,ENSCAFG00000015711,LOC479755,RAC1_CANFA,DAGLB
1805	NFd	11	57184707	57397026	212320	0.0503778	0.212032	3	ENSCAFG00000002395,SHB,ENSCAFG00000028415
1806	NFd	6	28804181	29015864	211684	0.0503778	0.212032	4	TMC5,TMC7,COQ7,ITPRIPL2
1807	NFd	11	28651487	28861743	210257	0.0503778	0.212032	7	FAM13B,WNT8A,NME5,ENSCAFG00000001165,BRD8,KIF20A,CDC23
1808	NFd	19	4867258	5077005	209748	0.0503778	0.212032	1
1809	NFd	29	4048515	4258108	209594	0.0503778	0.212032	2	A5HBK7_CANFA,ENSCAFG00000027779
1810	NFd	34	43562062	43770388	208327	0.0503778	0.212032	2	TBL1XR1,ENSCAFG00000026781
1811	BMD	31	6247495	6454374	206880	0.0507246	0.213374	1
1812	FSp	24	45033026	45245301	212276	0.0508906	0.213836	1	BMP7_CANFA
1813	FSp	14	5940756	6152786	212031	0.0508906	0.213836	3	AKR1B1,SLC35B4,LRGUK
1814	Dob	2	75170529	75376127	205599	0.0509709	0.214055	5	ENSCAFG00000011904,EYA3,SMPDL3B,RPA2,C1orf38
1815	Bgl	7	44846927	45061521	214595	0.0511509	0.214693	9	KIAA0907,ENSCAFG00000027646,ENSCAFG00000026285,RIT1,SYT11,XM_547544.2,MSTO1,DAP3,ASH1L
1816	IrW	26	3962098	4179262	217165	0.0514706	0.214726	6	PUS1,ULK1,MMP17,SFRS8,ENSCAFG00000023400,ENSCAFG00000028292
1817	IrW	8	23958543	24175656	217114	0.0514706	0.214726	1
1818	IrW	2	17809319	18026234	216916	0.0514706	0.214726	1	ARHGAP12
1819	Eur	21	6977477	7191645	214169	0.0519481	0.214726	1	ENSCAFG00000027003
1820	Eur	33	26500810	26714884	214075	0.0519481	0.214726	2	GSK3B,ENSCAFG00000017752
1821	Eur	2	65209708	65423645	213938	0.0519481	0.214726	3	CHD9,ENSCAFG00000021839,ENSCAFG00000009708
1822	Dac	3	46950934	47164178	213245	0.0514139	0.214726	3	ENSCAFG00000021411,NR2F2,ENSCAFG00000027066
1823	Dac	4	70094836	70308049	213214	0.0514139	0.214726	2	CCDC152,GHR_CANFA
1824	Dac	5	40339283	40552195	212913	0.0514139	0.214726	1	ENSCAFG00000017903
1825	Eur	2	47608525	47821405	212881	0.0519481	0.214726	1
1826	Eur	14	54016233	54228371	212139	0.0519481	0.214726	1	IMMP2L
1827	Eur	2	43687289	43899038	211750	0.0519481	0.214726	4	TCERG1,GPR151,PPP2R2B,ENSCAFG00000027775
1828	Wei	8	70502880	70714554	211675	0.0517241	0.214726	2	ENSCAFG00000026341,BCL11B
1829	Eur	13	7035021	7246599	211579	0.0519481	0.214726	5	ENSCAFG00000000632,ENSCAFG00000000634,ODF1,ENSCAFG00000028289,KLF10
1830	Eur	11	49026739	49237846	211108	0.0519481	0.214726	2	ENSCAFG00000001727,ENSCAFG00000025789
1831	Eur	14	57087497	57297984	210488	0.0519481	0.214726	1	MDFIC
1832	GSl	5	44205757	44416208	210452	0.0515464	0.214726	8	SHMT1,SMCR8,TOP3A,SMCR7,FLII,LLGL1,ALKBH5,MYO15A
1833	Elk	9	51321528	51531181	209654	0.0514706	0.214726	4	CACNA1B,EHMT1,ARRDC1,ZMYND19
1834	Eur	X	112830694	113040282	209589	0.0519481	0.214726	3	ATP11C,cfa-mir-505,CXorf66
1835	Eur	1	17493415	17702927	209513	0.0519481	0.214726	4	TNFRSF11A,KIAA1468,ENSCAFG00000000081,ENSCAFG00000027095
1836	LRe	12	32514174	32723514	209341	0.0518519	0.214726	1
1837	LRe	6	21252831	21461664	208834	0.0518519	0.214726	12	IL27,ENSCAFG00000017135,CLN3_CANFA,ENSCAFG00000017143,ATXN2L,TUFM,SH2B1,ATP2A1,RABEP2,CD19,NFATC2IP,SPNS1
1838	Elk	8	10780385	10988817	208433	0.0514706	0.214726	1
1839	Eur	8	32257252	32465440	208189	0.0519481	0.214726	3	DDHD1,ENSCAFG00000014875,ENSCAFG00000026128
1840	LRe	6	75267147	75474912	207766	0.0518519	0.214726	2	LRRIQ3,ENSCAFG00000025755
1841	LRe	34	33135681	33342993	207313	0.0518519	0.214726	3	ENSCAFG00000025889,ENSCAFG00000028114,ENSCAFG00000014397
1842	LRe	28	24416220	24622790	206571	0.0518519	0.214726	2	ADD3,MXI1
1843	GoS	26	18948238	19153375	205138	0.0513447	0.214726	3	CCDC64,ENSCAFG00000010145,GCN1L1
1844	JRT	7	39525907	39735701	209795	0.0523691	0.215998	1
1845	JRT	25	46590178	46799139	208962	0.0523691	0.215998	5	PDE6D_CANFA,COPS7B,ENSCAFG00000020689,NPPC,ENSCAFG00000025982
1846	JRT	3	32353173	32561687	208515	0.0523691	0.215998	2	ENSCAFG00000027533,AGGF1
1847	JRT	24	20981163	21189639	208477	0.0523691	0.215998	9	C20orf194,SLC4A11,ITPA,DDRGK1,XM_855813.1,FASTKD5,UBOX5,Q8SPU9_CANFA,OXT
1848	StP	6	34700841	34917587	216747	0.0525	0.21642	4	CLEC16A,DEXI,CIITA,ENSCAFG00000024270
1849	NFd	33	21911519	22119415	207897	0.0528967	0.217938	1
1850	BoT	10	9933314	10155349	222036	0.0538462	0.221013	6	C12orf56,XPOT,TBK1,,C12orf66,ENSCAFG00000026334
1851	BoT	9	28991695	29213439	221745	0.0538462	0.221013	6	NXPH3,SPOP,SLC35B1,FAM117A,LOC611269,TAC4
1852	BoT	29	35751689	35973136	221448	0.0538462	0.221013	1	CNGB3_CANFA
1853	BoT	10	24511245	24731582	220338	0.0538462	0.221013	5	KIAA1644,PARVG,PARVB,ENSCAFG00000026928,SAMM50
1854	BoT	5	43231868	43452070	220203	0.0538462	0.221013	2	AKAP10,ULK2
1855	BoT	28	7938612	8157584	218973	0.0538462	0.221013	1	ENSCAFG00000007218
1856	BoT	14	11950679	12168744	218066	0.0538462	0.221013	2	GRM8,cfa-mir-592
1857	Dac	19	8795331	9008058	212728	0.0539846	0.221343	1
1858	Dac	30	7645057	7856864	211808	0.0539846	0.221343	1	ENSCAFG00000004067
1859	GSl	11	23300144	23510424	210281	0.0541237	0.221674	2	IL3_CANFA,CSF2_CANFA
1860	GSl	28	36614332	36824134	209803	0.0541237	0.221674	2	O46389_CANFA,NKX1-1
1861	Gry	33	4754565	4969312	214748	0.0544554	0.222153	2	ARL13B,NSUN3
1862	GSh	18	4757339	4971847	214509	0.0545906	0.222153	4	ENSCAFG00000022458,ENSCAFG00000003379,A0JL50_CANFA,GRB10
1863	GSh	13	56770101	56984338	214238	0.0545906	0.222153	1	ENSCAFG00000002378
1864	GSh	19	41545533	41758956	213424	0.0545906	0.222153	8	R3HDM1,UBXN4,ENSCAFG00000028010,LCT,MCM6,ENSCAFG00000026780,ENSCAFG00000026017,DARS
1865	Gry	18	10530940	10743899	212960	0.0544554	0.222153	1
1866	GSh	19	20470869	20683661	212793	0.0545906	0.222153	5	O77767_CANFA,BBS12,XM_540962.2,ENSCAFG00000021039,IL21_CANFA
1867	Gry	18	15013348	15226017	212670	0.0544554	0.222153	5	SFRP4,ENSCAFG00000003652,ENSCAFG00000003656,ENSCAFG00000025326,PNPLA8
1868	Gry	28	11833914	12044891	210978	0.0544554	0.222153	1	SORBS1
1869	BrS	16	28430425	28641002	210578	0.0545455	0.222153	2	ENSCAFG00000005758,ADAM18
1870	Gry	3	3665093	3875619	210527	0.0544554	0.222153	1
1871	Eur	11	57836375	58044219	207845	0.0545455	0.222153	5	TDRD7,TMOD1,TSTD2,NCBP1,XPA
1872	Eur	24	29186703	29394037	207335	0.0545455	0.222153	1	CTNNBL1
1873	GRe	22	26109365	26327316	217952	0.0549738	0.222749	1
1874	GRe	5	81916847	82134285	217439	0.0549738	0.222749	1
1875	GRe	24	37528370	37744959	216590	0.0549738	0.222749	4	ENSCAFG00000010763,ENSCAFG00000010850,NCOA3,Q32KH1_CANFA
1876	GRe	5	72072533	72288489	215957	0.0549738	0.222749	1
1877	StP	28	39211211	39426178	214968	0.055	0.222749	1	ENSCAFG00000013062
1878	StP	9	8426431	8641341	214911	0.055	0.222749	12	KCTD2,LOC478252,ICT1,CDR2L,C17orf28,OTOP3,OTOP2,Q53I76_CANFA,FADS6,FDXR,GRIN2C,TMEM104
1879	ESt	14	15895439	16104913	209475	0.055	0.222749	3	ENSCAFG00000024943,ENSCAFG00000001790,KIAA1324L
1880	ESt	1	52542936	52752065	209130	0.055	0.222749	2	PLMN_CANFA,MAP3K4
1881	ESt	28	3392313	3600620	208308	0.055	0.222749	2	MAPK8,ARHGAP22
1882	NFd	17	65165909	65372486	206578	0.0554156	0.224313	4	MAGI3,ENSCAFG00000025935,ENSCAFG00000013231,ENSCAFG00000024551
1883	CoS	10	65668705	65878116	209412	0.0555556	0.22476	1	EHBP1
1884	NSD	2	40033730	40252062	218333	0.056266	0.226073	1	SPRY4
1885	NSD	2	32937207	33154763	217557	0.056266	0.226073	5	ANKRD16,GDIB_CANFA,C10orf18,ENSCAFG00000028403,ASB13
1886	NSD	10	18336207	18553547	217341	0.056266	0.226073	1	ENSCAFG00000024260
1887	NSD	12	34640898	34857665	216768	0.056266	0.226073	2	ENSCAFG00000002537,ENSCAFG00000026030
1888	NSD	20	5472180	5687113	214934	0.056266	0.226073	3	GATA2,ENSCAFG00000004144,RPN1
1889	NSD	29	35447544	35661497	213954	0.056266	0.226073	3	WWP1,ENSCAFG00000028180,FAM82B
1890	NSD	4	69002706	69216261	213556	0.056266	0.226073	2	FGF10,ENSCAFG00000027305
1891	NSD	9	32923794	33136942	213149	0.056266	0.226073	1
1892	NSD	27	3523037	3735952	212916	0.056266	0.226073	1
1893	Bgl	26	3042476	3254313	211838	0.056266	0.226073	8	ENSCAFG00000002456,ENSCAFG00000023490,ENSCAFG00000012350,XM_534630.2,ENSCAFG00000026226,ENSCAFG00000023438,ENSCAFG00000026248,ENSCAFG00000006033
1894	BeT	12	30856924	31062835	205912	0.0560976	0.226073	1
1895	BeT	22	12289398	12495308	205911	0.0560976	0.226073	6	MTRF1,ENSCAFG00000004800,XM_542586.2,ENSCAFG00000021641,KBTBD6,WBP4
1896	GoS	15	10368078	10572594	204517	0.0562347	0.226073	1
1897	BoC	29	22371327	22578521	207195	0.0563725	0.226382	1
1898	Dac	14	37745127	37955766	210640	0.0565553	0.22678	1
1899	Wei	11	28651487	28861743	210257	0.0566502	0.22678	7	FAM13B,WNT8A,NME5,ENSCAFG00000001165,BRD8,KIF20A,CDC23
1900	Wei	13	15818506	16028699	210194	0.0566502	0.22678	1	CSMD3
1901	Wei	22	20584714	20794371	209658	0.0566502	0.22678	1
1902	Wei	1	98569544	98778700	209157	0.0566502	0.22678	1	NFIL3
1903	Wei	36	3824013	4032710	208698	0.0566502	0.22678	2	ENSCAFG00000025972,GALNT13
1904	GSl	10	48939909	49147523	207615	0.056701	0.226864	1	THADA_CANFA
1905	Sci	4	36606848	36812479	205632	0.057072	0.228108	1	ENSCAFG00000023483
1906	TYo	3	47282285	47487148	204864	0.057072	0.228108	2	ENSCAFG00000010921,ENSCAFG00000026734
1907	StP	24	15683564	15898300	214737	0.0575	0.22862	2	C20orf103,PLCB4
1908	EBD	4	68434272	68648178	213907	0.0573566	0.22862	1	ENSCAFG00000018512
1909	StP	7	59174201	59388069	213869	0.0575	0.22862	1	ASXL3
1910	EBD	9	22147511	22360957	213447	0.0573566	0.22862	3	ENSCAFG00000021806,FZD2,GPATCH8
1911	StP	5	37397200	37609394	212195	0.0575	0.22862	3	GAS7,ENSCAFG00000026074,ENSCAFG00000017459
1912	EBD	15	17871299	18083325	212027	0.0573566	0.22862	6	ENSCAFG00000004578,TESK2,TOE1,MUTYH,HPDL,XM_848124.1
1913	EBD	21	44881024	45092922	211899	0.0573566	0.22862	3	ENSCAFG00000009438,ENSCAFG00000026112,ENSCAFG00000023908
1914	EBD	28	28784949	28996709	211761	0.0573566	0.22862	1	ATRNL1
1915	StP	10	24607900	24819649	211750	0.0575	0.22862	6	PARVG,PARVB,ENSCAFG00000026928,SAMM50,PNPLA3,ENSCAFG00000026810
1916	StP	17	40178634	40389688	211055	0.0575	0.22862	8	XM_849582.1,IL1F7,IL1F9,IL1F8,IL1F5,IL1F10,IL1RA_CANFA,PSD4
1917	GRe	36	14287773	14502955	215183	0.0575916	0.228626	2	SCN9A,Q0Q0H3_CANFA
1918	GRe	34	4859531	5074165	214635	0.0575916	0.228626	1
1919	GRe	1	79542067	79755616	213550	0.0575916	0.228626	1
1920	CoS	8	18393650	18600071	206422	0.0580808	0.230328	3	SLC25A21,ENSCAFG00000013718,ENSCAFG00000013727
1921	CoS	X	5856623	6062866	206244	0.0580808	0.230328	1	ENSCAFG00000011329
1922	GoS	25	28500405	28704031	203627	0.0586797	0.232461	2	ENSCAFG00000007921,ENSCAFG00000028324
1923	GoS	1	5525854	5729345	203492	0.0586797	0.232461	2	ENSCAFG00000027476,GALR1
1924	IrW	18	18003455	18217464	214010	0.0588235	0.232668	2	SRPK2,ENSCAFG00000026537
1925	NSD	14	9639151	9850122	210972	0.0588235	0.232668	5	ENSCAFG00000026321,C7orf45,TMEM209,KLHDC10,ZC3HC1
1926	Bgl	11	28651487	28861743	210257	0.0588235	0.232668	7	FAM13B,WNT8A,NME5,ENSCAFG00000001165,BRD8,KIF20A,CDC23
1927	Dac	11	28651487	28861743	210257	0.059126	0.2335	7	FAM13B,WNT8A,NME5,ENSCAFG00000001165,BRD8,KIF20A,CDC23
1928	Dac	16	11999868	12209859	209992	0.059126	0.2335	3	HIPK2,ENSCAFG00000026720,ENSCAFG00000025858
1929	Dac	25	15343896	15552670	208775	0.059126	0.2335	1	USP12
1930	GSl	4	79983258	80189803	206546	0.0592784	0.233981	1
1931	ShP	X	112830694	113040282	209589	0.0594595	0.234574	3	ATP11C,cfa-mir-505,CXorf66
1932	GSh	34	19656723	19866456	209734	0.0595533	0.23458	3	YEATS2,PARL,A0ST32_CANFA
1933	GSh	22	20584714	20794371	209658	0.0595533	0.23458	1
1934	TYo	10	5035631	5240223	204593	0.0595533	0.23458	1
1935	GRe	3	10275855	10488060	212206	0.0602094	0.237042	1
1936	BMD	18	8005885	8210900	205016	0.0603865	0.237616	1	ENSCAFG00000027740
1937	NFd	9	48229641	48435397	205757	0.0604534	0.237756	7	ENSCAFG00000019078,RNMTL1,GLOD4,ENSCAFG00000019127,GEMIN4,FAM57A,VPS53
1938	BeT	23	54533076	54736390	203315	0.0609756	0.239686	3	SHOX2,RSRC1,ENSCAFG00000022640
1939	FSp	8	59704757	59915128	210372	0.0610687	0.239805	2	ENSCAFG00000017323,ENSCAFG00000017325
1940	FSp	11	28651487	28861743	210257	0.0610687	0.239805	7	FAM13B,WNT8A,NME5,ENSCAFG00000001165,BRD8,KIF20A,CDC23
1941	Rtw	10	5035631	5240223	204593	0.0611247	0.239901	1
1942	IrW	18	18557269	18769604	212336	0.0612745	0.240118	1	ENSCAFG00000025400
1943	Elk	24	7052981	7258810	205830	0.0612745	0.240118	1
1944	Elk	13	48843272	49049073	205802	0.0612745	0.240118	3	XM_539268.2,ENSCAFG00000002034,LNX1
1945	NSD	24	3049146	3259539	210394	0.0613811	0.240288	6	XM_843201.1,CST8,ENSCAFG00000005120,CST11,NAPB,GZF1
1946	NSD	11	18703872	18913755	209884	0.0613811	0.240288	5	GRAMD3,ENSCAFG00000021521,ALDH7A1,PHAX,C5orf48
1947	BoT	20	5472180	5687113	214934	0.0615385	0.240781	3	GATA2,ENSCAFG00000004144,RPN1
1948	Dac	11	44206776	44414986	208211	0.0616967	0.241152	3	ENSCAFG00000001675,B7VFC9_CANFA,Q9GMF2_CANFA
1949	LRe	17	8903765	9109411	205647	0.0617284	0.241152	2	KIDINS220,MBOAT2
1950	LRe	24	22683407	22888718	205312	0.0617284	0.241152	3	RAD21L1,C20orf46,PSMF1
1951	Gry	6	21252831	21461664	208834	0.0618812	0.241625	12	IL27,ENSCAFG00000017135,CLN3_CANFA,ENSCAFG00000017143,ATXN2L,TUFM,SH2B1,ATP2A1,RABEP2,CD19,NFATC2IP,SPNS1
1952	Sci	6	40143620	40348648	205029	0.0620347	0.241977	4	TFAP4,SRL,ADCY9,ENSCAFG00000025899
1953	TYo	13	7127019	7331416	204398	0.0620347	0.241977	3	ODF1,ENSCAFG00000028289,KLF10
1954	ShP	21	24381850	24589215	207366	0.0621622	0.24235	4	PAK1,GDPD4,ENSCAFG00000025150,ENSCAFG00000005074
1955	BrS	28	9188044	9397617	209574	0.0623377	0.242439	4	ENSCAFG00000007285,ENSCAFG00000007296,TNKS2,FGFBP3
1956	EBD	4	21461289	21670680	209392	0.0623441	0.242439	2	LRRTM3,ENSCAFG00000028248
1957	EBD	14	26023199	26232560	209362	0.0623441	0.242439	1	MIOS
1958	JRT	18	10664501	10871703	207203	0.0623441	0.242439	1	ENSCAFG00000025197
1959	Eur	12	27438524	27642141	203618	0.0623377	0.242439	1	ENSCAFG00000023267
1960	StP	14	57087497	57297984	210488	0.0625	0.242673	1	MDFIC
1961	StP	15	41001729	41210202	208474	0.0625	0.242673	7	XM_532660.2,ENSCAFG00000026374,IKBIP,APAF_CANFA,ENSCAFG00000026384,ANKS1B,ENSCAFG00000006667
1962	StP	12	31352429	31560773	208345	0.0625	0.242673	2	ENSCAFG00000028040,ENSCAFG00000002503
1963	BMD	34	20673265	20876932	203668	0.0628019	0.243473	1	VPS8
1964	BMD	9	49563673	49765017	201345	0.0628019	0.243473	7	SMG6,LSM5,SRR,TSR1,ENSCAFG00000026040,ENSCAFG00000025963,SGSM2
1965	BMD	7	21160544	21360093	199550	0.0628019	0.243473	4	ENSCAFG00000027187,RNF2,C1orf25,C1orf26
1966	BeT	3	18054602	18257541	202940	0.0634146	0.245724	1	FAM172A
1967	FSp	7	26059833	26266918	207086	0.0636132	0.246243	3	XM_547452.2,ENSCAFG00000023760,ENSCAFG00000021016
1968	FSp	17	9344102	9551083	206982	0.0636132	0.246243	4	ASAP2,ITGB1BP1,CPSF3,IAH1
1969	IrW	1	66517748	66729425	211678	0.0637255	0.246302	1	NKAIN2
1970	BoC	11	6712664	6918331	205668	0.0637255	0.246302	1
1971	BoC	18	18452306	18657507	205202	0.0637255	0.246302	1	ENSCAFG00000025400
1972	BoT	4	5856312	6070131	213820	0.0641026	0.247508	2	ENSCAFG00000025810,ENSCAFG00000010041
1973	BoT	22	22832055	23044830	212776	0.0641026	0.247508	1
1974	LRe	13	56279227	56483535	204309	0.0641975	0.247749	2	ENSCAFG00000002364,ENSCAFG00000020804
1975	Dac	4	7727921	7935672	207752	0.0642674	0.247849	5	ARID4B,RBM34,TOMM20,ENSCAFG00000025761,ENSCAFG00000020876
1976	GSh	19	23368512	23575624	207113	0.0645161	0.247849	6	ENSCAFG00000024065,ENSCAFG00000004202,ENSCAFG00000022684,FAM123C,ENSCAFG00000004207,ENSCAFG00000027456
1977	GSh	15	41608211	41815031	206821	0.0645161	0.247849	2	ANKS1B,ENSCAFG00000023633
1978	Gry	34	18793983	19000460	206478	0.0643564	0.247849	4	ATP11B,ENSCAFG00000020761,ENSCAFG00000026605,DCUN1D1
1979	Gry	21	4828296	5034632	206337	0.0643564	0.247849	1	ENSCAFG00000022278
1980	Sci	24	34470134	34673800	203667	0.0645161	0.247849	2	C20orf100,JPH2
1981	Sci	1	90380255	90583868	203614	0.0645161	0.247849	2	MAMDC2,XP_533530.2
1982	TYo	5	57676511	57878270	201760	0.0645161	0.247849	4	ENSCAFG00000019045,MRPL37,CYB5RL,CDCP2
1983	TYo	X	118237483	118438916	201434	0.0645161	0.247849	1	XM_538189.2
1984	StP	11	39101990	39310116	208127	0.065	0.249456	1	C9orf93
1985	ESt	22	49339281	49544973	205693	0.065	0.249456	2	DNAJC3,UGGT2
1986	GRe	2	24365331	24577049	211719	0.065445	0.250785	5	NMT2,RPP38,MEIG1,DCLRE1C,SUV39H2
1987	GRe	22	35859936	36070768	210833	0.065445	0.250785	2	ENSCAFG00000026136,ENSCAFG00000021290
1988	GRe	1	7391997	7602641	210645	0.065445	0.250785	1	ZNF407
1989	NFd	3	17979085	18181987	202903	0.0654912	0.250836	1	FAM172A
1990	Dob	26	10349779	10550835	201057	0.065534	0.250873	6	WDR66,PSMD9,HPD,SETD1B,RHOF,TMEM120B
1991	CoS	1	27332052	27536921	204870	0.0656566	0.251216	3	MC2R,MC5R,XM_533404.2
1992	IrW	3	3665093	3875619	210527	0.0661765	0.252445	1
1993	FSp	15	14445711	14651939	206229	0.0661578	0.252445	1
1994	BoC	4	59189581	59392846	203266	0.0661765	0.252445	1	ENSCAFG00000023474
1995	BoC	23	53149905	53352280	202376	0.0661765	0.252445	3	KCNAB1,SSR3,TIPARP
1996	BoC	5	40095131	40297123	201993	0.0661765	0.252445	1
1997	GoS	8	59558747	59760426	201680	0.0660147	0.252445	1
1998	Wei	21	35787865	35995617	207753	0.0665025	0.253308	6	TMEM41B,ENSCAFG00000007241,IPO7,ENSCAFG00000021670,ENSCAFG00000007332,ZNF143
1999	Wei	31	6247495	6454374	206880	0.0665025	0.253308	1
[truncated: 5,619 more rows]

## Sheet: di
no.	breed	chr	start	end	length	marginal p-value	5% FDR p-value	no. genes	gene list
1	ShP	22	4,828,721	6,233,045	1,404,325	0.000116009	0.0675383	15	C13orf1,KPNA3,XM_534113.2,XM_534114.2,RCBTB1,ENSCAFG00000025781,PHF11,SETDB2,CAB39L,CDADC1,FNDC3A,CYSLTR2,RCBTB2,Q9N122_CANFA,ITM2B
2	JRT	10	10,265,925	11,644,756	1,378,832	0.000116009	0.0675383	10	RASSF3,Q32KH4_CANFA,TBC1D30,WIF1,LEMD3,MSRB3,ENSCAFG00000027222,ENSCAFG00000022943,LLPH,TMBIM4
3	Elk	13	3,778,724	5,152,585	1,373,862	0.000116009	0.0675383	12	ENSCAFG00000000484,ENSCAFG00000026312,OSR2,VPS13B,ENSCAFG00000025782,cfa-mir-599,cfa-mir-875,ENSCAFG00000024078,XM_532281.2,ENSCAFG00000000532,FBXO43,SPAG1
4	TYo	10	10,265,925	11,559,700	1,293,776	0.000116009	0.0675383	8	RASSF3,Q32KH4_CANFA,TBC1D30,WIF1,LEMD3,MSRB3,ENSCAFG00000027222,ENSCAFG00000022943
5	EBD	9	4,125,282	5,418,477	1,293,196	0.000116009	0.0675383	22	RPTOR,ENSCAFG00000027033,NPTX1,XM_845456.1,ENSCAFG00000005675,RNF213,SLC26A11,NP_001003114.1,CARD14,EIF4A3,ENSCAFG00000005596,GAA,CCDC40,TBC1D16,CBX4,CBX8,CBX2,ENPP7,ENSCAFG00000026100,ENSCAFG00000005547,ENGASE,C1QTNF1
6	BoC	22	15,982,263	17,193,960	1,211,698	0.000116009	0.0675383	2	PCDH17,ENSCAFG00000024478
7	EBD	26	10,491,787	11,629,631	1,137,845	0.000116009	0.0675383	29	RHOF,TMEM120B,MORN3,ORAI1,ENSCAFG00000026873,XM_855093.1,ENSCAFG00000023544,ENSCAFG00000023459,RNF34,ANAPC5,CAMKK2,Q64F94_CANFA,B0FLR1_CANFA,IFT81,ENSCAFG00000027198,ENSCAFG00000028087,AT2A2_CANFA,ANAPC7,ENSCAFG00000008456,GPN3,VPS29,RAD9B,ENSCAFG00000020
8	FSp	22	4,300,860	5,397,353	1,096,494	0.000116009	0.0675383	19	ENSCAFG00000028086,ENSCAFG00000004303,ENSCAFG00000027600,ENSCAFG00000027090,C13orf1,ENSCAFG00000020963,cfa-mir-15a,cfa-mir-16-1,KCNRG,TRIM13,KPNA3,XM_534113.2,XM_534114.2,RCBTB1,ENSCAFG00000025781,PHF11,SETDB2,CAB39L,CDADC1
9	NFd	22	4,300,860	5,361,506	1,060,647	0.000116009	0.0675383	18	ENSCAFG00000028086,ENSCAFG00000004303,ENSCAFG00000027600,ENSCAFG00000027090,C13orf1,ENSCAFG00000020963,cfa-mir-15a,cfa-mir-16-1,KCNRG,TRIM13,KPNA3,XM_534113.2,XM_534114.2,RCBTB1,ENSCAFG00000025781,PHF11,SETDB2,CAB39L
10	Elk	10	10,707,193	11,644,756	937.564	0.000116009	0.0675383	7	WIF1,LEMD3,MSRB3,ENSCAFG00000027222,ENSCAFG00000022943,LLPH,TMBIM4
11	LRe	13	40,738,270	41,665,437	927.168	0.000116009	0.0675383	36	ENSCAFG00000001554,HSF1,DGAT1,ENSCAFG00000001573,FBXL6,ENSCAFG00000001588,ADCK5,CPSF1,ENSCAFG00000001607,VPS28,NFKBIL2,CYHR1,KIFC2,FOXH1,PPP1R16A,GPT,MFSD3,RECQL4,LRRC14,LRRC24,ARHGAP39,COMMD5,ZNF7,ENSCAFG00000024976,RPL8,ENSCAFG00000001679,ZN252_CANFA,C8
12	Bgl	13	3,266,021	4,176,521	910.501	0.000232019	0.0990566	13	MATN2,XM_843126.1,ENSCAFG00000025847,C8orf47,HRSP12,POP1,NIPAL2,ENSCAFG00000018581,KCNS2,ENSCAFG00000000484,ENSCAFG00000026312,OSR2,VPS13B
13	TYo	3	40,471,308	41,367,554	896.247	0.000232019	0.0990566	11	ENSCAFG00000024028,TRPM1,ENSCAFG00000026652,cfa-mir-211,MTMR10,MTMR15,XM_844258.1,MCEE,ENSCAFG00000024415,APBA2,FAM189A1
14	TYo	26	10,744,458	11,629,631	885.174	0.000232019	0.0990566	23	XM_855093.1,ENSCAFG00000023459,RNF34,ANAPC5,CAMKK2,Q64F94_CANFA,B0FLR1_CANFA,IFT81,ENSCAFG00000027198,ENSCAFG00000028087,AT2A2_CANFA,ANAPC7,ENSCAFG00000008456,GPN3,VPS29,RAD9B,ENSCAFG00000020796,PPTC7,TCTN1,HVCN1,NP_001003069.1,PP1G_CANFA,CCDC63
15	ESt	19	46,765,322	47,637,012	871.691	0.000232019	0.0990566	5	ENSCAFG00000024633,ENSCAFG00000005456,ENSCAFG00000024630,ENSCAFG00000028398,ENSCAFG00000021065
16	ShP	3	3,069,417	3,922,440	853.024	0.000348028	0.131104	4	REEP5,APC,EPB41L4A,ENSCAFG00000026159
17	TYo	24	25,532,482	26,370,499	838.018	0.000348028	0.131104	20	ENSCAFG00000007398,ENSCAFG00000007403,SNTA1,CBFA2T2,NECAB3,C20orf134,E2F1,PXMP4,ENSCAFG00000026300,ENSCAFG00000007447,ZNF341,ENSCAFG00000022243,CHMP4B,ENSCAFG00000007483,ENSCAFG00000007487,RALY,ENSCAFG00000021644,EIF2S2,Q2LIQ4_CANFA,ENSCAFG00000024610
18	BrS	10	10,832,919	11,644,756	811.838	0.000580046	0.135077	5	MSRB3,ENSCAFG00000027222,ENSCAFG00000022943,LLPH,TMBIM4
19	BoT	19	10,239,039	11,031,247	792.209	0.000812065	0.135077	3	XM_847405.1,ENSCAFG00000027835,ENSCAFG00000003774
20	IrW	37	3,170,534	3,960,864	790.331	0.000812065	0.135077	12	WDR75,ENSCAFG00000027512,SLC40A1,XM_536000.2,ANKAR,OSGEPL1,PMS1,ORMDL1,ENSCAFG00000024655,GDF8_CANFA,C2orf88,HIBCH
21	Sci	10	10,769,841	11,559,700	789.86	0.000812065	0.135077	4	LEMD3,MSRB3,ENSCAFG00000027222,ENSCAFG00000022943
22	Bgl	19	7,269,772	8,058,198	788.427	0.000812065	0.135077	4	A2TC22_CANFA,XM_845072.1,ENSCAFG00000003756,PCDH18
23	Dac	10	10,859,628	11,644,756	785.129	0.000812065	0.135077	5	MSRB3,ENSCAFG00000027222,ENSCAFG00000022943,LLPH,TMBIM4
24	NSD	3	5,299,580	6,082,996	783.417	0.000812065	0.135077	3	MAN2A1,PJA2,FER_CANFA
25	GSl	22	4,962,482	5,739,774	777.293	0.000812065	0.135077	10	KPNA3,XM_534113.2,XM_534114.2,RCBTB1,ENSCAFG00000025781,PHF11,SETDB2,CAB39L,CDADC1,FNDC3A
26	TYo	3	42,088,959	42,862,621	773.663	0.000812065	0.135077	13	TARSL2,ENSCAFG00000021728,TM2D3,XM_844548.1,ENSCAFG00000027203,PCSK6,ENSCAFG00000010558,SNRPA1,XM_844589.1,CHSY1,XP_534518.1,ENSCAFG00000002151,ENSCAFG00000023124
27	BrS	12	58,608,990	59,375,948	766.959	0.000812065	0.135077	2	C6orf167,ENSCAFG00000022961
28	LRe	1	9,212,708	9,967,206	754.499	0.000928074	0.135077	4	NETO1,CBLN2,ENSCAFG00000008376,ENSCAFG00000000034
29	NSD	32	6,569,533	7,320,527	750.995	0.000928074	0.135077	7	XM_845315.1,XM_535625.2,ENSCAFG00000027343,ENSCAFG00000027730,ENSCAFG00000027703,ANTXR2,ENSCAFG00000022388
30	Wei	21	35,995,617	36,742,453	746.837	0.000928074	0.135077	14	ZNF143,ENSCAFG00000022270,WEE1,SWAP70,ENSCAFG00000007500,XM_534052.2,XM_849146.1,ENSCAFG00000007529,XM_849153.1,ENSCAFG00000007532,ENSCAFG00000024485,ADML_CANFA,ENSCAFG00000008138,ENSCAFG00000008290
31	NFd	1	96,014,266	96,750,162	735.897	0.00104408	0.135077	18	NP_001003139.1,C9orf68,PPAPDC2,CDC37L1,XM_533543.2,ENSCAFG00000002085,RCL1,ENSCAFG00000027229,cfa-mir-101-2,ENSCAFG00000021196,ENSCAFG00000023391,ENSCAFG00000027926,JAK2,INSL6,RELX_CANFA,LOC609677,CD274,PDCD1LG2
32	Dob	1	102,282,421	103,013,936	731.516	0.00104408	0.135077	25	ENSCAFG00000002346,ENSCAFG00000028231,ENSCAFG00000028408,CENPBD1,MZF1,UBE2M,CHMP2A,Q9XSU8_CANFA,ZBTB45,SLC27A5,XM_541340.2,ZNF584,ENSCAFG00000002363,RPS5,ZNF837,A1BG,ZNF8,ZNF274,ENSCAFG00000028331,XM_848460.1,ZSCAN18,ZNF135,ENSCAFG00000008539,ENSCAFG00000
33	ESt	25	31,271,708	31,998,963	727.256	0.00104408	0.135077	6	KIF13B,HMBOX1,ENSCAFG00000027998,INTS9,EXTL3,FZD3
34	ShP	6	33,320,114	34,031,035	710.922	0.00104408	0.135077	5	SNX29,ENSCAFG00000018849,TNFRSF17,GSPT1,XM_536972.2
35	Sci	23	44,418,291	45,127,859	709.569	0.00104408	0.135077	4	PLSCR4,XM_849174.1,ENSCAFG00000026963,ENSCAFG00000008189
36	GSh	19	9,374,835	10,079,899	705.065	0.00104408	0.135077
37	BeT	18	9,042,097	9,746,419	704.323	0.00104408	0.135077	8	LANCL2,ENSCAFG00000026283,VOPP1,XM_533075.2,C7orf44,STK17A,HECW1,ENSCAFG00000021296
38	CoS	12	37,631,996	38,333,218	701.223	0.00104408	0.135077	4	RIMS1,ENSCAFG00000023047,ENSCAFG00000027776,KCNQ5
39	LRe	28	26,971,862	27,670,658	698.797	0.00104408	0.135077	5	TCF7L2,HABP2,NRAP,CASP7,C10orf81
40	NSD	24	25,997,395	26,695,056	697.662	0.00104408	0.135077	16	CHMP4B,ENSCAFG00000007483,ENSCAFG00000007487,RALY,ENSCAFG00000021644,EIF2S2,Q2LIQ4_CANFA,ENSCAFG00000024610,AHCY,XM_847433.1,ENSCAFG00000027271,ITCH,ENSCAFG00000021539,DYNLRB1,MAP1LC3A,PIGU
41	NSD	25	43,754,687	44,452,308	697.622	0.00104408	0.135077	2	ENSCAFG00000025762,PID1
42	Eur	1	101,751,632	102,446,085	694.454	0.00104408	0.135077	16	BICD2,IPPK,XM_533561.2,ECM2,ENSCAFG00000024350,ASPN,OMD,OGN,ENSCAFG00000022245,NOL8,ENSCAFG00000028066,IARS,ENSCAFG00000002343,ENSCAFG00000002346,ENSCAFG00000028231,ENSCAFG00000028408
43	ESt	3	63,471,330	64,161,002	689.673	0.00104408	0.135077	13	ENSCAFG00000021752,LRPAP1,DOK7,ENSCAFG00000014627,HGFA_CANFA,ENSCAFG00000023553,RGS12,XM_856612.1,C4orf44,O18897_CANFA,GRK4,ENSCAFG00000014715,NOP14
44	Bgl	22	7,455,129	8,142,174	687.046	0.00104408	0.135077	8	ESD,LRCH1,C13orf18,LRRC63,LCP1,CPB2,ENSCAFG00000004511,ENSCAFG00000025204
45	Dac	3	44,003,971	44,689,464	685.494	0.00104408	0.135077	4	MEF2A,LRRC28,TTC23,SYNM
46	Dac	4	5,337,682	6,022,985	685.304	0.00104408	0.135077	6	Q8WN72_CANFA,ENSCAFG00000026154,ENSCAFG00000008063,ENSCAFG00000028329,ENSCAFG00000028199,ENSCAFG00000025810
47	JRT	25	4,483,387	5,165,793	682.407	0.00104408	0.135077	8	COG6,ENSCAFG00000005998,ENSCAFG00000025601,NHLRC3,C13orf23,ENSCAFG00000022279,STOML3,FREM2
48	LRe	1	10,868,253	11,549,335	681.083	0.00104408	0.135077	5	ENSCAFG00000000035,XM_851410.1,Q6JDH2_CANFA,CD226,DOK6
49	BMD	21	30,326,049	31,004,056	678.008	0.00104408	0.135077	46	ENSCAFG00000015417,ENSCAFG00000015140,ENSCAFG00000025104,ENSCAFG00000025052,OR51S1,A4GXA5_CANFA,ENSCAFG00000012624,OR51H1P,XM_548782.2,OR51T1,ENSCAFG00000024999,ENSCAFG00000012577,OR51G2,OR51G1,XM_847501.1,MMP26,OR51L1,A4GXA7_CANFA,ENSCAFG00000012505,XM_8
50	Eur	8	30,127,154	30,786,254	659.101	0.00116009	0.135077	5	NIN,ABHD12B,Q9N0W1_CANFA,TRIM9,TMX1
51	Elk	17	21,526,353	22,176,549	650.197	0.0012761	0.135077	9	XM_532889.2,FKBP1B,TP53I3,PFN4,ITSN2,NCOA1,C2orf79,CENPO,ADCY3
52	Wei	1	78,647,340	79,296,593	649.254	0.0012761	0.135077	7	KIF27,GKAP1,UBQLN1,C9orf103,ENSCAFG00000022609,ENSCAFG00000023649,FRMD3
53	Sci	32	7,863,969	8,512,584	648.616	0.0012761	0.135077	4	ENSCAFG00000024794,BMP3,PRKG2,RASGEF1B
54	GoS	11	46,750,486	47,395,809	645.324	0.0012761	0.135077	3	ENSCAFG00000007543,ENSCAFG00000001693,ENSCAFG00000022614
55	Dob	2	65,336,299	65,980,323	644.025	0.0012761	0.135077	3	CHD9,ENSCAFG00000021535,TOX3
56	Dob	16	10,927,731	11,570,550	642.82	0.00139211	0.135077	9	ENSCAFG00000028175,Q698R1_CANFA,NDUFB2,ADCK2,DENND2A,ENSCAFG00000022071,MKRN1,RAB19,SLC37A3
57	IrW	21	36,101,012	36,742,453	641.442	0.00139211	0.135077	11	SWAP70,ENSCAFG00000007500,XM_534052.2,XM_849146.1,ENSCAFG00000007529,XM_849153.1,ENSCAFG00000007532,ENSCAFG00000024485,ADML_CANFA,ENSCAFG00000008138,ENSCAFG00000008290
58	TYo	2	44,986,270	45,623,831	637.562	0.00139211	0.135077	14	SCGB3A2,ENSCAFG00000006738,C5orf46,NP_001020568.1,IPSG_CANFA,GZMA,CDC20B,cfa-mir-449,ENSCAFG00000022832,ENSCAFG00000023182,CCNO,DHX29,SKIV2L2,PPAP2A
59	StP	1	7,391,997	8,028,486	636.49	0.00139211	0.135077	6	ZNF407,ENSCAFG00000026962,CNDP1,CNDP2,FAM69C,C18orf55
60	EBD	7	3,659,746	4,293,073	633.328	0.00139211	0.135077	15	PPP1R12B,UBE2T,LGR6,ENSCAFG00000010570,PTPN7,GPR37L1,ENSCAFG00000010507,ELF3,RNPEP,TIMM17A,ENSCAFG00000025451,ENSCAFG00000010633,IPO9,ENSCAFG00000010671,NAV1
61	EBD	1	115,630,525	116,262,183	631.659	0.00150812	0.135077	29	AXL,CYP2S1,ENSCAFG00000024538,CP2BB_CANFA,ENSCAFG00000005065,Q307K7_CANFA,ENSCAFG00000023849,ENSCAFG00000020702,Q307K8_CANFA,CYP2F1,XM_533661.2,EGLN2,RAB4B_CANFA,MIA,SNRPA,C19orf54,ITPKC,ADCK4,NUMBL,LTBP4,SHKBP1,SPTBN4,BLVRB,SERTAD3,XM_541614.2,PRX,HIPK4,
62	GRe	16	29,341,926	29,970,109	628.184	0.00150812	0.135077	7	ADAM32,ADAM9,TM2D2,HTRA4,PLEKHA2,TACC1,ENSCAFG00000025419
63	Sci	34	21,119,061	21,746,569	627.509	0.00150812	0.135077	7	MAP3K13,TMEM41A,LIPH,SENP2,IGF2BP2,TRA2B,ETV5
64	CoS	10	31,925,613	32,548,482	622.87	0.00150812	0.135077	2	HMGXB4,ISX
65	GoS	X	81,802,936	82,425,557	622.622	0.00150812	0.135077	2	ENSCAFG00000017859,ENSCAFG00000027346
66	Eur	2	4,370,410	4,992,817	622.408	0.00150812	0.135077	6	CCNY,XM_843492.1,ENSCAFG00000026967,CREM_CANFA,ENSCAFG00000003687,CUL2
67	JRT	24	25,751,298	26,370,499	619.202	0.00150812	0.135077	17	CBFA2T2,NECAB3,C20orf134,E2F1,PXMP4,ENSCAFG00000026300,ENSCAFG00000007447,ZNF341,ENSCAFG00000022243,CHMP4B,ENSCAFG00000007483,ENSCAFG00000007487,RALY,ENSCAFG00000021644,EIF2S2,Q2LIQ4_CANFA,ENSCAFG00000024610
68	BoT	19	19,716,202	20,334,120	617.919	0.00150812	0.135077	7	XM_846236.1,ENSCAFG00000003975,ENSCAFG00000028203,SPRY1,ENSCAFG00000024724,ENSCAFG00000026772,ENSCAFG00000003988
69	CoS	1	74,544,282	75,160,210	615.929	0.00162413	0.135077	8	ENSCAFG00000023612,XM_843898.1,cfa-mir-24-1,cfa-mir-27b,cfa-mir-23b,ENSCAFG00000001291,ENSCAFG00000023549,FBP1
70	CoS	12	36,295,435	36,909,311	613.877	0.00162413	0.135077	7	A1EAA2_CANFA,B3GA2_CANFA,ENSCAFG00000002619,OGFRL1,cfa-mir-30c-2,ENSCAFG00000026626,cfa-mir-30a
71	Elk	1	101,762,662	102,376,422	613.761	0.00162413	0.135077	14	BICD2,IPPK,XM_533561.2,ECM2,ENSCAFG00000024350,ASPN,OMD,OGN,ENSCAFG00000022245,NOL8,ENSCAFG00000028066,IARS,ENSCAFG00000002343,ENSCAFG00000002346
72	BoT	15	53,747,764	54,358,433	610.67	0.00162413	0.135077	8	ARFIP1,ENSCAFG00000008206,FHDC1,ENSCAFG00000028132,TRIM2,MND1,ENSCAFG00000008273,ENSCAFG00000008287
73	BoC	29	26,357,296	26,962,719	605.424	0.00162413	0.135077	5	CRISPLD1,ENSCAFG00000027111,HNF4G,ENSCAFG00000026298,ENSCAFG00000025547
74	Bgl	17	4,687,576	5,291,318	603.743	0.00162413	0.135077	8	TSSC1,TTC15,ENSCAFG00000027457,RNASEH1,RPS7,COLEC11,ALLC,ENSCAFG00000003283
75	TYo	25	4,483,387	5,084,716	601.33	0.00162413	0.135077	7	COG6,ENSCAFG00000005998,ENSCAFG00000025601,NHLRC3,C13orf23,ENSCAFG00000022279,STOML3
76	Rtw	15	44,198,967	44,797,653	598.687	0.00162413	0.135077	3	IGF1_CANFA,PAH,ASCL1
77	CoS	8	38,885,916	39,482,632	596.717	0.00162413	0.135077	8	MNAT1,ENSCAFG00000015644,TRMT5,SLC38A6,TMEM30B,PRKCH,ENSCAFG00000015709,ENSCAFG00000022396
78	Dac	18	23,130,080	23,722,397	592.318	0.00174014	0.14287	3	GNAT3,CD36,SEMA3C
79	Eur	1	62,985,377	63,574,985	589.609	0.00185615	0.148585	2	ENSCAFG00000022670,ENSCAFG00000000947
80	IrW	30	21,919,224	22,506,588	587.365	0.00185615	0.148585	2	ENSCAFG00000024446,WDR72
81	NSD	4	10,975,918	11,558,839	582.922	0.00208817	0.165094	11	EGLN1,ENSCAFG00000026454,C1orf124,EXOC8,GNPAT,C1orf131,TRIM67,FAM89A,ARV1,TTC13,ENSCAFG00000011960
82	GoS	9	22,818,895	23,399,439	580.545	0.00232019	0.179018	28	MPP3,C17orf105,ENSCAFG00000014438,DUSP3,SOST,ENSCAFG00000014466,MEOX1,ENSCAFG00000026280,Q95JC2_CANFA,DHX8,ARL4D,ENSCAFG00000021609,ENSCAFG00000022014,ENSCAFG00000022981,ENSCAFG00000022977,ENSCAFG00000022914,ENSCAFG00000022928,ENSCAFG00000020861,ENSCAFG00
83	GSl	30	3,941,855	4,521,877	580.023	0.00232019	0.179018	6	C15orf24,ENSCAFG00000027544,CHRM5,AVEN,RYR3,ENSCAFG00000024238
84	Dob	2	64,439,528	65,018,511	578.984	0.00243619	0.18573	4	IRX3,ENSCAFG00000027975,FTO,RPGRIP1L
85	Gry	16	5,402,251	5,971,618	569.368	0.0025522	0.192286	2	ENSCAFG00000003479,ENSCAFG00000021650
86	Dac	18	7,958,203	8,527,058	568.856	0.00278422	0.196987	3	ENSCAFG00000027740,ENSCAFG00000020721,VSTM2A
87	FSp	12	27,438,524	28,006,566	568.043	0.00278422	0.196987	2	ENSCAFG00000023267,XM_532185.2
88	GSl	24	4,956,330	5,524,041	567.712	0.00278422	0.196987	4	XRN2,ENSCAFG00000005214,ENSCAFG00000005232,ENSCAFG00000027317
89	ESt	25	23,863,002	24,430,650	567.649	0.00278422	0.196987	4	AADAT,ENSCAFG00000022084,ENSCAFG00000022636,ENSCAFG00000020835
90	NSD	21	36,081,149	36,647,661	566.513	0.00290023	0.196987	8	SWAP70,ENSCAFG00000007500,XM_534052.2,XM_849146.1,ENSCAFG00000007529,XM_849153.1,ENSCAFG00000007532,ENSCAFG00000024485
91	StP	9	29,419,223	29,985,725	566.503	0.00290023	0.196987	24	ITGA3,PDK2,SAMD14,SGCA,HILS1,CO1A1_CANFA,ENSCAFG00000026166,ENSCAFG00000026054,TMEM92,ENSCAFG00000017025,XYLT2_CANFA,MRPL27,EME1,LRRC59,ACSF2,CHAD,RSAD1,MYCBPAP,EPN3,SPATA20,CACNA1G,Q38IV3_CANFA,ANKRD40,LUC7L3
92	BoC	23	34,804,572	35,368,731	564.16	0.00301624	0.196987	1	ENSCAFG00000006971
93	FSp	4	5,612,237	6,170,824	558.588	0.00313225	0.196987	6	Q8WN72_CANFA,ENSCAFG00000008063,ENSCAFG00000028329,ENSCAFG00000028199,ENSCAFG00000025810,ENSCAFG00000010041
94	GRe	16	30,116,171	30,671,681	555.511	0.00313225	0.196987	16	WHSC1L1,PPAPDC1B,DDHD2,BAG4,LSM1,A5A394_CANFA,ASH2L,EIF4EBP1,ADRB3_CANFA,GOT1L1,RAB11FIP1,BRF2,GPR124,PROSC,ERLIN2,ZNF703
95	GSh	3	3,069,417	3,624,489	555.073	0.00313225	0.196987	4	REEP5,APC,EPB41L4A,ENSCAFG00000026159
96	Bgl	14	39,494,546	40,046,510	551.965	0.00313225	0.196987	14	ENSCAFG00000002737,ENSCAFG00000026620,ENSCAFG00000002739,FAM126A,ENSCAFG00000021723,ENSCAFG00000026155,MYEOV2,KLHL7,NUPL2,GPNMB,C7orf30,IGF2BP3,ENSCAFG00000021802,ENSCAFG00000027055
97	EBD	5	44,847,121	45,395,079	547.959	0.00324826	0.196987	11	PEMT,ENSCAFG00000026606,ENSCAFG00000018534,RASD1,MED9,NT5M,ENSCAFG00000001949,COPS3,B1NLQ8_CANFA,PLD6,MPRIP
98	GSh	5	44,847,121	45,395,079	547.959	0.00324826	0.196987	11	PEMT,ENSCAFG00000026606,ENSCAFG00000018534,RASD1,MED9,NT5M,ENSCAFG00000001949,COPS3,B1NLQ8_CANFA,PLD6,MPRIP
99	LRe	11	56,163,280	56,710,322	547.043	0.00336427	0.196987	4	PAX5,ENSCAFG00000024624,ENSCAFG00000022959,XM_538733.2
100	BMD	5	55,987,596	56,534,479	546.884	0.00336427	0.196987	1	ENSCAFG00000023430
101	Bgl	2	64,546,567	65,091,541	544.975	0.00336427	0.196987	2	FTO,RPGRIP1L
102	Dac	5	66,716,173	67,260,410	544.238	0.00336427	0.196987	17	TCF25,SPIRE2,FANCA,ZNF276,C16orf7,SPATA2L,CDK10,C16orf55,XM_546776.2,DPEP1,CPNE7,RPL13,ENSCAFG00000021886,SPG7,ANKRD11,ENSCAFG00000019845,CDH15
103	Elk	24	26,202,760	26,746,051	543.292	0.00348028	0.196987	13	RALY,ENSCAFG00000021644,EIF2S2,Q2LIQ4_CANFA,ENSCAFG00000024610,AHCY,XM_847433.1,ENSCAFG00000027271,ITCH,ENSCAFG00000021539,DYNLRB1,MAP1LC3A,PIGU
104	JRT	13	10,987,746	11,528,745	541	0.00348028	0.196987	3	XM_844664.1,ANGP1_CANFA,ENSCAFG00000021358
105	Sci	11	73,231,284	73,772,058	540.775	0.00348028	0.196987	3	PAPPA,ASTN2,TRIM32
106	NFd	23	5,554,493	6,094,632	540.14	0.00348028	0.196987	6	ABHD5,ENSCAFG00000011032,ANO10,ENSCAFG00000018259,ENSCAFG00000004484,SNRK
107	BoT	10	10,265,925	10,804,969	539.045	0.00348028	0.196987	5	RASSF3,Q32KH4_CANFA,TBC1D30,WIF1,LEMD3
108	GoS	24	25,951,395	26,489,797	538.403	0.00348028	0.196987	12	ZNF341,CHMP4B,ENSCAFG00000007483,ENSCAFG00000007487,RALY,ENSCAFG00000021644,EIF2S2,Q2LIQ4_CANFA,ENSCAFG00000024610,AHCY,XM_847433.1,ENSCAFG00000027271
109	EBD	26	9,445,622	9,981,133	535.512	0.00348028	0.196987	16	ARL6IP4,PITPNM2,OGFOD2,ABCB9,VPS37B,HIP1R,CCDC62,ENSCAFG00000022326,DENR,B9UM26_CANFA,GPR109A,A1DZY5_CANFA,KNTC1,RSRC2,ZCCHC8,ENSCAFG00000026410
110	BeT	12	27,472,774	28,006,566	533.793	0.00359629	0.196987	2	ENSCAFG00000023267,XM_532185.2
111	Dob	X	73,166,462	73,698,152	531.691	0.00394432	0.196987	4	ENSCAFG00000023321,XM_538098.2,ENSCAFG00000023261,ENSCAFG00000017483
112	FSp	20	41,202,527	41,734,129	531.603	0.00394432	0.196987	4	DOCK3,ENSCAFG00000027962,ENSCAFG00000010275,MAPKAPK3
113	BoC	24	4,737,867	5,268,516	530.65	0.00394432	0.196987	4	PAX1,NKX2-2,XRN2,ENSCAFG00000005214
114	BoT	19	8,832,024	9,361,711	529.688	0.00406032	0.196987
115	EBD	8	50,735,642	51,265,199	529.558	0.00406032	0.196987	14	LTBP2,KIAA0317,LOC612615,YLPM1,PROX2,DLST,RPS6KL1,PGF,EIF2B2,MLH3,ACYP1,FAM164C,NEK9,TMED10
116	NFd	18	9,070,872	9,599,524	528.653	0.00406032	0.196987	6	LANCL2,ENSCAFG00000026283,VOPP1,XM_533075.2,C7orf44,STK17A
117	GoS	5	46,315,900	46,844,229	528.33	0.00406032	0.196987	8	IL23R,ENSCAFG00000028444,SLC35D1,MIER1,WDR78,ENSCAFG00000027523,TCTEX1D1,SGIP1
118	BrS	5	44,205,757	44,733,392	527.636	0.00406032	0.196987	17	SHMT1,SMCR8,TOP3A,SMCR7,FLII,LLGL1,ALKBH5,MYO15A,DRG2,C17orf39,ATPAF2,LRRC48,TOM1L2,ENSCAFG00000024581,Q7YSA0_CANFA,cfa-mir-33b,RAI1
119	NFd	15	8,618,476	9,145,910	527.435	0.00406032	0.196987	12	CSF3R,MRPS15,OSCP1,LSM10,STK40,ENSCAFG00000003388,THRAP3,MAP7D1,TEKT2,TRAPPC3,COL8A2,ADPRHL2
120	CoS	4	57,586,080	58,112,968	526.889	0.00406032	0.196987	3	MRPL22,ENSCAFG00000017608,GEMIN5
121	Bgl	12	37,677,439	38,202,857	525.419	0.00406032	0.196987	3	ENSCAFG00000023047,ENSCAFG00000027776,KCNQ5
122	GSh	3	69,408,881	69,933,007	524.127	0.00406032	0.196987	5	RAB28,ENSCAFG00000026142,ENSCAFG00000017364,ENSCAFG00000027247,ENSCAFG00000015438
123	Rtw	3	70,592,503	71,116,588	524.086	0.00406032	0.196987	1	ENSCAFG00000015447
124	Dac	18	27,034,564	27,555,064	520.501	0.00406032	0.196987	3	SEMA3D,ENSCAFG00000027671,ENSCAFG00000028042
125	Sci	18	3,028,416	3,548,846	520.431	0.00406032	0.196987	3	SUNC1,C7orf57,ABCA13
126	Gry	10	5,035,631	5,555,944	520.314	0.00406032	0.196987
127	NFd	X	104,971,619	105,491,202	519.584	0.00406032	0.196987	5	ARHGAP36,ENSCAFG00000022172,OR11A1,IGSF1,ENSCAFG00000023200
128	Bgl	5	6,361,572	6,881,047	519.476	0.00406032	0.196987	2	ENSCAFG00000021116,ENSCAFG00000026662
129	EBD	13	37,837,157	38,354,835	517.679	0.00406032	0.196987	3	XM_539179.2,EIF2C2,PTK2
130	Dob	13	15,818,506	16,334,230	515.725	0.00406032	0.196987	2	CSMD3,ENSCAFG00000025884
131	BMD	6	39,430,624	39,944,085	513.462	0.00406032	0.196987	19	C16orf89,NAGPA,SEC14L5,Q8SPS5_CANFA,UBN1,GLYR1,ROGDI,SEPT12,ZNF500,C16orf71,ANKS3,NUDT16L1,MGRN1,FAM100A,ENSCAFG00000023563,XM_859149.1,C16orf5,ENSCAFG00000026475,HMOX2
132	Elk	2	70,457,036	70,969,884	512.849	0.00406032	0.196987	5	ITFG1,NETO2,DNAJA2,ZSCAN20,PHC2
133	NFd	25	6,115,389	6,627,762	512.374	0.00417633	0.19742	2	TRPC4,POSTN
134	BrS	25	6,115,389	6,627,762	512.374	0.00417633	0.19742	2	TRPC4,POSTN
135	EBD	5	64,719,235	65,230,874	511.64	0.00417633	0.19742	5	SLC45A1,ENSCAFG00000019688,ENSCAFG00000023803,XM_546758.2,ENSCAFG00000019691
136	StP	17	3,026,987	3,538,051	511.065	0.00429234	0.19742	5	ENSCAFG00000027828,FAM110C,SH3YL1,ENSCAFG00000003206,TMEM18
137	BoT	18	9,042,097	9,552,987	510.891	0.00429234	0.19742	5	LANCL2,ENSCAFG00000026283,VOPP1,XM_533075.2,C7orf44
138	CoS	11	22,472,195	22,982,788	510.594	0.00429234	0.19742	10	HINT1,ENSCAFG00000000733,ENSCAFG00000027933,LYRM7,CDC42SE2,ENSCAFG00000028312,XM_846793.1,XM_844843.1,ENSCAFG00000026874,ENSCAFG00000000755
139	BoT	3	36,123,640	36,633,140	509.501	0.00429234	0.19742	6	ENSCAFG00000009932,ENSCAFG00000026923,XM_843321.1,ENSCAFG00000010007,GABRA5,ENSCAFG00000027511
140	BrS	1	23,194,162	23,702,279	508.118	0.00440835	0.19742	2	ITF2_CANFA,CCDC68
141	TYo	3	13,506,748	14,011,930	505.183	0.00440835	0.19742
142	BoT	10	8,810,412	9,314,870	504.459	0.00440835	0.19742	2	PPM1H,AVPR1A
143	Gry	4	77,440,764	77,945,165	504.402	0.00440835	0.19742	1	ENSCAFG00000028113
144	GRe	23	35,765,203	36,268,176	502.974	0.00464037	0.202156	5	PCCB,ENSCAFG00000027764,STAG1,ENSCAFG00000007439,ENSCAFG00000022489
145	FSp	3	3,421,421	3,922,440	501.02	0.00464037	0.202156	2	EPB41L4A,ENSCAFG00000026159
146	GSl	18	9,099,215	9,599,524	500.31	0.00464037	0.202156	6	LANCL2,ENSCAFG00000026283,VOPP1,XM_533075.2,C7orf44,STK17A
147	Dob	33	3,000,524	3,499,170	498.647	0.00464037	0.202156	3	C3orf38,ENSCAFG00000009973,ENSCAFG00000025407
148	BeT	14	6,301,070	6,797,874	496.805	0.00475638	0.20581	1	XM_539369.2
149	StP	32	34,416,398	34,912,108	495.711	0.0049884	0.212971	1	ENSCAFG00000022305
150	BeT	4	3,024,984	3,520,564	495.581	0.0049884	0.212971	8	IFIT2,ENSCAFG00000027240,IFIT1,ENSCAFG00000009629,ENSCAFG00000009862,XM_843437.1,ENSCAFG00000021693,O77766_CANFA
151	BoC	24	20,658,568	21,152,173	493.606	0.00522042	0.217088	11	SIGLEC1,ADAM33,GFRA4,ATRN,ENSCAFG00000006367,C20orf194,SLC4A11,ITPA,DDRGK1,XM_855813.1,FASTKD5
152	StP	5	41,737,933	42,230,987	493.055	0.00522042	0.217088	9	XM_848963.1,XM_845890.1,PMP22,TEKT3,ENSCAFG00000027955,CDRT4,FAM18B,XM_858503.1,ENSCAFG00000027757
153	GoS	22	4,904,331	5,397,353	493.023	0.00522042	0.217088	9	KPNA3,XM_534113.2,XM_534114.2,RCBTB1,ENSCAFG00000025781,PHF11,SETDB2,CAB39L,CDADC1
154	EBD	27	30,695,803	31,188,730	492.928	0.00522042	0.217088	3	AEBP2,ENSCAFG00000026090,PLEKHA5
155	CoS	10	10,677,936	11,169,956	492.021	0.00533643	0.220481	4	WIF1,LEMD3,MSRB3,ENSCAFG00000027222
156	Wei	31	12,717,901	13,208,064	490.164	0.00556845	0.221108	2	XM_535556.2,ENSCAFG00000007980
157	StP	12	10,109,913	10,599,152	489.24	0.00556845	0.221108	6	ENSCAFG00000023191,ENSCAFG00000027765,XM_538898.2,GLO1,,ZFAND3
158	FSp	31	4,711,935	5,200,387	488.453	0.00568445	0.221108	2	CADM2,ENSCAFG00000027182
159	Sci	10	4,215,158	4,703,539	488.382	0.00568445	0.221108	20	NAB2,B1ABU7_CANFA,ENSCAFG00000000178,SHMT2,NDUFA4L2,STAC3,R3HDM2,INHBC,INHBE,GLI1,ARHGAP9,MARS,DDIT3,DCTN2,KIF5A,PIP4K2C,DTX3,ENSCAFG00000000250,SLC26A10,B4GALNT1
160	ShP	15	23,116,407	23,603,720	487.314	0.00568445	0.221108	1	ENSCAFG00000005722
161	ShP	19	4,495,739	4,982,823	487.085	0.00568445	0.221108	2	ENSCAFG00000003628,ZNF330
162	CoS	1	46,966,914	47,452,852	485.939	0.00580046	0.221108	6	OPRM1,IPCEF1,ENSCAFG00000027747,ENSCAFG00000028230,ENSCAFG00000027144,CNKSR3
163	BeT	6	59,603,696	60,089,576	485.881	0.00580046	0.221108	9	XM_850094.1,RPAP2,GLMN,ENSCAFG00000027373,KIAA1107,BTBD8,EPHX4,ENSCAFG00000000949,BRDT
164	Dac	6	42,020,965	42,506,456	485.492	0.00580046	0.221108	25	RPL3L,ENSCAFG00000019484,HS3ST6,C16orf73,FAHD1,HAGH,IGFALS,NUBP2,SPSB3,EME2,MRPS34,NME3,MAPK8IP3,HN1L,CRAMP1L,XM_547195.2,TMEM204,ENSCAFG00000028007,TELO2,PTX4,CLCN7,ENSCAFG00000019581,GNPTG,C16orf42,BAIAP3
165	NFd	32	25,023,745	25,509,009	485.265	0.00580046	0.221108	3	ENSCAFG00000010631,EMCN,ENSCAFG00000026800
166	BMD	1	62,920,946	63,405,710	484.765	0.00580046	0.221108	2	ENSCAFG00000022670,ENSCAFG00000000947
167	Dob	13	14,615,683	15,099,980	484.298	0.00580046	0.221108	1	XM_844893.1
168	NSD	2	27,133,643	27,617,829	484.187	0.00580046	0.221108	6	DHTKD1,ENSCAFG00000026422,XM_544258.2,ENSCAFG00000024529,C10orf47,ECHDC3
169	Bgl	24	35,784,370	36,264,918	480.549	0.00603248	0.226293	25	WFDC8,ENSCAFG00000009710,Q9XSV4_CANFA,ENSCAFG00000009716,NHP2L1,WFDC9,ENSCAFG00000025395,WFDC11,WFDC10B,WFDC13,SPINT4,DNTTIP1,UBE2C,TNNC2,SNX21,ACOT8,ZSWIM3,ZSWIM1,C20orf165,NEURL2,A8D0E9_CANFA,PLTP,PCIF1,ZNF335,MMP9_CANFA
170	FSp	26	18,948,238	19,428,580	480.343	0.00614849	0.226293	15	CCDC64,ENSCAFG00000010145,GCN1L1,Q9TTI6_CANFA,PXN,ENSCAFG00000022995,ENSCAFG00000023002,SIRT4,PA21B_CANFA,MSI1,ENSCAFG00000026525,XM_534704.2,GATC,SFRS9,DYNLL1
171	GRe	10	42,162,747	42,642,755	480.009	0.00614849	0.226293	1	ENSCAFG00000026741
172	Eur	15	23,099,961	23,578,610	478.65	0.00614849	0.226293	1	ENSCAFG00000005722
173	GSl	22	3,050,582	3,529,187	478.606	0.00614849	0.226293	4	ENSCAFG00000004252,NP_001020438.1,CCDC70,WDFY2
174	ShP	22	3,050,582	3,529,187	478.606	0.00614849	0.226293	4	ENSCAFG00000004252,NP_001020438.1,CCDC70,WDFY2
175	Wei	4	5,337,682	5,814,043	476.362	0.00638051	0.227004	5	Q8WN72_CANFA,ENSCAFG00000026154,ENSCAFG00000008063,ENSCAFG00000028329,ENSCAFG00000028199
176	NSD	4	5,337,682	5,814,043	476.362	0.00638051	0.227004	5	Q8WN72_CANFA,ENSCAFG00000026154,ENSCAFG00000008063,ENSCAFG00000028329,ENSCAFG00000028199
177	Bgl	19	46,974,751	47,449,037	474.287	0.00638051	0.227004	2	ENSCAFG00000024630,ENSCAFG00000028398
178	ESt	25	23,162,190	23,635,759	473.57	0.00638051	0.227004	4	NEK1,ENSCAFG00000028260,NP_001020790.1,C4orf27
179	JRT	1	95,988,193	96,461,676	473.484	0.00638051	0.227004	13	NP_001003139.1,C9orf68,PPAPDC2,CDC37L1,XM_533543.2,ENSCAFG00000002085,RCL1,ENSCAFG00000027229,cfa-mir-101-2,ENSCAFG00000021196,ENSCAFG00000023391,ENSCAFG00000027926,JAK2
180	TYo	3	58,258,912	58,731,798	472.887	0.00638051	0.227004	4	ADAMTSL3,ENSCAFG00000027045,FAM154B,ENSCAFG00000013671
181	Dac	12	37,677,439	38,149,976	472.538	0.00649652	0.227343	2	ENSCAFG00000023047,ENSCAFG00000027776
182	BoT	29	35,661,497	36,133,144	471.648	0.00649652	0.227343	4	FAM82B,CPNE3,CNGB3_CANFA,ENSCAFG00000025423
183	BoC	23	35,765,203	36,236,737	471.535	0.00649652	0.227343	5	PCCB,ENSCAFG00000027764,STAG1,ENSCAFG00000007439,ENSCAFG00000022489
184	BoT	19	21,115,901	21,585,877	469.977	0.00684455	0.23822	5	TRPC3,BBS7,CCNA2,EXOSC9,ANXA5
185	Bgl	5	49,397,019	49,866,374	469.356	0.00696056	0.238371	6	PGM1,EFCAB7,ENSCAFG00000028030,ALG6,ENSCAFG00000027470,FOXD3
186	IrW	31	17,840,305	18,308,314	468.01	0.00696056	0.238371	1	ENSCAFG00000021702
187	JRT	8	22,326,392	22,794,282	467.891	0.00696056	0.238371	2	ENSCAFG00000013946,LRFN5
188	Gry	4	39,294,074	39,761,350	467.277	0.00707657	0.23978	10	NSD1,FGFR4,ZNF346,C15orf48,ENSCAFG00000026478,UIMC1,ENSCAFG00000021632,ENSCAFG00000028410,HK3,UNC5A
189	JRT	13	5,470,260	5,935,764	465.505	0.00707657	0.23978	4	SNX31,PABPC1,YWHAZ,ENSCAFG00000022575
190	BeT	22	39,629,285	40,094,187	464.903	0.00719258	0.242428
191	IrW	13	3,895,672	4,359,308	463.637	0.00730858	0.243772	3	ENSCAFG00000026312,OSR2,VPS13B
192	TYo	38	25,898,545	26,362,148	463.604	0.00730858	0.243772	27	ENSCAFG00000025115,MNDA,ENSCAFG00000011692,XM_545737.1,Q70Z80_CANFA,OR6K6,XM_848067.1,XM_848074.1,XM_848081.1,OR6K2,SPTA1,OR10Z1,OR10X1,OR6P1,OR6Y1,XM_848151.1,ENSCAFG00000011575,XM_848158.1,OR10K1,LOC610646,OR10K2,OR10T2,CD1E,ENSCAFG00000021594,B3FRK2_CA
193	GoS	10	10,707,193	11,169,956	462.764	0.00765661	0.252747	4	WIF1,LEMD3,MSRB3,ENSCAFG00000027222
194	GoS	30	21,338,659	21,800,830	462.172	0.00765661	0.252747	3	ONECUT1,ENSCAFG00000023634,ENSCAFG00000020936
195	Gry	27	36,724,368	37,185,863	461.496	0.00777262	0.253958	5	CREBL2,DUSP16,LOH12CR1,MANSC1,LRP6
196	FSp	5	76,662,168	77,122,164	459.997	0.00777262	0.253958	2	ADAMTS18,MON1B
197	BoT	2	63,742,229	64,201,948	459.72	0.00788863	0.255145	2	ENSCAFG00000026661,IRX5
198	StP	22	8,582,273	9,041,230	458.958	0.00788863	0.255145	11	SLC25A30,ENSCAFG00000004533,ENSCAFG00000022040,ENSCAFG00000028157,ENSCAFG00000026451,XM_545520.2,KCTD4,ENSCAFG00000004550,ENSCAFG00000004552,KIAA1704,NUFIP1
199	CoS	30	5,573,998	6,031,260	457.263	0.00835267	0.261997	3	AQR,ZNF770,ATPBD4
200	GRe	22	4,904,331	5,361,506	457.176	0.00835267	0.261997	8	KPNA3,XM_534113.2,XM_534114.2,RCBTB1,ENSCAFG00000025781,PHF11,SETDB2,CAB39L
201	GSh	1	27,055,561	27,511,704	456.144	0.00835267	0.261997	6	ME2,MRO,ENSCAFG00000020845,MC2R,MC5R,XM_533404.2
202	GSh	10	10,644,758	11,100,691	455.934	0.00835267	0.261997	4	WIF1,LEMD3,MSRB3,ENSCAFG00000027222
203	Rtw	8	5,753,349	6,208,378	455.03	0.00846868	0.261997	13	ENSCAFG00000025159,ENSCAFG00000011124,ENSCAFG00000011098,ENSCAFG00000025128,DAD1,ABHD4,ENSCAFG00000011156,OXA1L,ENSCAFG00000011223,SLC7A7,MRPL52,O97657_CANFA,ENSCAFG00000022520
204	GSh	19	18,945,891	19,400,774	454.884	0.00846868	0.261997	1	ENSCAFG00000026596
205	IrW	13	14,645,635	15,099,980	454.346	0.00846868	0.261997	1	XM_844893.1
206	FSp	15	44,198,967	44,651,395	452.429	0.00846868	0.261997	2	IGF1_CANFA,PAH
207	IrW	7	69,113,822	69,565,271	451.45	0.00846868	0.261997	9	ENSCAFG00000028035,MIB1,cfa-mir-1-2,cfa-mir-133a,ABHD3,ENSCAFG00000026138,SNRPD1,ESCO1,GREB1L
208	Elk	17	23,105,200	23,554,732	449.533	0.00858469	0.264309	8	KIF3C,RAB10_CANFA,FAM59B,HADHA,GPR113,EPT1,C2orf39,OTOF
209	FSp	12	10,151,633	10,599,152	447.52	0.0087007	0.266599	5	ENSCAFG00000023191,ENSCAFG00000027765,XM_538898.2,GLO1,
210	Elk	1	96,014,266	96,461,676	447.411	0.00881671	0.268568	13	NP_001003139.1,C9orf68,PPAPDC2,CDC37L1,XM_533543.2,ENSCAFG00000002085,RCL1,ENSCAFG00000027229,cfa-mir-101-2,ENSCAFG00000021196,ENSCAFG00000023391,ENSCAFG00000027926,JAK2
211	ESt	21	15,164,334	15,610,854	446.521	0.00893271	0.268568	1	TMEM135
212	Rtw	17	46,197,222	46,643,429	446.208	0.00893271	0.268568	1	ENSCAFG00000008079
213	CoS	21	36,203,138	36,647,661	444.524	0.00893271	0.268568	7	ENSCAFG00000007500,XM_534052.2,XM_849146.1,ENSCAFG00000007529,XM_849153.1,ENSCAFG00000007532,ENSCAFG00000024485
214	TYo	3	44,003,971	44,448,182	444.212	0.00904872	0.269526	3	MEF2A,LRRC28,TTC23
215	Sci	31	17,864,195	18,308,314	444.12	0.00904872	0.269526	1	ENSCAFG00000021702
216	BMD	20	28,257,988	28,700,818	442.831	0.00928074	0.273889
217	ShP	22	11,223,308	11,665,737	442.43	0.00928074	0.273889	2	AKAP11,DGKH
218	ESt	25	28,067,293	28,509,087	441.795	0.00951276	0.275655	4	GLRA3,ENSCAFG00000007918,ADAM29,ENSCAFG00000027595
219	BoC	10	10,707,193	11,148,822	441.63	0.00951276	0.275655	4	WIF1,LEMD3,MSRB3,ENSCAFG00000027222
220	Eur	10	10,707,193	11,148,822	441.63	0.00951276	0.275655	4	WIF1,LEMD3,MSRB3,ENSCAFG00000027222
221	Dac	8	44,931,565	45,373,061	441.497	0.00951276	0.275655	2	ENSCAFG00000028171,ENSCAFG00000016489
222	BoC	13	6,337,263	6,777,361	440.099	0.00974478	0.278187	4	GRHL2,NCALD,UBE2NL,XM_539108.2
223	GoS	23	25,862,027	26,301,867	439.841	0.00974478	0.278187	2	SGOL1,KAT2B
224	EBD	5	35,545,353	35,985,186	439.834	0.00974478	0.278187	22	ATP1B2,P53_CANFA,WRAP53,DNAH2,KDM6B,TMEM88,LSMD1,CYB5D1,CHD3,ENSCAFG00000028299,KCNAB3,TRAPPC1,CNTROB,GUC2D_CANFA,ALOX15B,ALOX12B,ALOXE3,HES7,PER1,VAMP2,ENSCAFG00000022578,TMEM107
225	Rtw	36	8,165,226	8,603,332	438.107	0.00986079	0.278187	6	BAZ2B,XM_844705.1,ENSCAFG00000009456,ENSCAFG00000022153,MARCH7,A8WH73_CANFA
226	Wei	37	3,327,876	3,763,882	436.007	0.00986079	0.278187	8	SLC40A1,XM_536000.2,ANKAR,OSGEPL1,PMS1,ORMDL1,ENSCAFG00000024655,GDF8_CANFA
227	CoS	8	49,564,583	50,000,466	435.884	0.00986079	0.278187	11	PSN1_CANFA,ENSCAFG00000016823,NUMB,SDHD,HEATR4,ENSCAFG00000016842,ENSCAFG00000016848,ACOT4,ENSCAFG00000027416,ACOT6,DNAL1
228	LRe	17	58,741,515	59,175,366	433.852	0.0100928	0.279904	1	TBX15
229	BeT	17	6,536,243	6,969,885	433.643	0.0102088	0.279904
230	TYo	13	11,095,120	11,528,745	433.626	0.0102088	0.279904	2	ANGP1_CANFA,ENSCAFG00000021358
231	NSD	21	42,308,467	42,740,966	432.5	0.0104408	0.279904	3	SOX6,PLEKHA7,ENSCAFG00000026926
232	BeT	2	41,464,407	41,894,911	430.505	0.0104408	0.279904	3	ENSCAFG00000022316,YIPF5,ENSCAFG00000006326
233	BoT	20	20,306,519	20,736,559	430.041	0.0105568	0.279904	2	XM_855847.1,ENSCAFG00000028396
234	Dac	16	5,587,747	6,017,728	429.982	0.0105568	0.279904	2	ENSCAFG00000003479,ENSCAFG00000021650
235	Dob	17	48,459,041	48,887,436	428.396	0.0107889	0.279904	1	ENSCAFG00000021403
236	FSp	24	20,512,878	20,941,059	428.182	0.0107889	0.279904	13	MAVS,C20orf29,CDC25B,CENPB,SPEF1,ENSCAFG00000006197,HSPA12B,SIGLEC1,ADAM33,GFRA4,ATRN,ENSCAFG00000006367,C20orf194
237	StP	25	25,603,323	26,031,224	427.902	0.0109049	0.279904	1	XM_843853.1
238	Dac	6	45,025,251	45,451,813	426.563	0.0109049	0.279904	14	HBXIP,CSF1,EPS8L3,GSTM3,Q9TRV2_CANFA,AMPD2,GNAT2,cfa-mir-197,GNAI3,XM_537040.2,AMIGO1,CYB561D1,ATXN7L2,SYPL2
239	BMD	3	64,297,322	64,723,341	426.02	0.0110209	0.279904	4	TNIP2,C4orf8,RNF4,ZFYVE28
240	StP	2	64,665,533	65,091,541	426.009	0.0110209	0.279904	2	FTO,RPGRIP1L
241	Dac	18	18,769,604	19,195,559	425.956	0.0110209	0.279904	1	ORC5L
242	Gry	30	5,626,814	6,052,640	425.827	0.0110209	0.279904	3	AQR,ZNF770,ATPBD4
243	NSD	5	66,404,859	66,829,648	424.79	0.0111369	0.279904	12	KIF1B,XM_546767.2,ENSCAFG00000019801,GAS8,DBNDD1,DEF8,Q9N0F8_CANFA,cfa-mir-220a,MSHR_CANFA,TCF25,SPIRE2,FANCA
244	BeT	7	15,311,823	15,736,499	424.677	0.0111369	0.279904	3	PTPN14,Q9GKN4_CANFA,ENSCAFG00000012599
245	Dob	27	16,772,766	17,197,255	424.49	0.0111369	0.279904	6	SLC2A13,ENSCAFG00000026005,ENSCAFG00000027407,C12orf40,ABCD2,ENSCAFG00000010036
246	Bgl	X	110,540,522	110,963,640	423.119	0.0111369	0.279904	3	ENSCAFG00000018975,ENSCAFG00000026455,ZIC3
247	JRT	1	101,698,682	102,121,711	423.03	0.0111369	0.279904	14	FGD3,XM_848193.1,BICD2,IPPK,XM_533561.2,ECM2,ENSCAFG00000024350,ASPN,OMD,OGN,ENSCAFG00000022245,NOL8,ENSCAFG00000028066,IARS
248	CoS	8	5,753,349	6,175,530	422.182	0.0111369	0.279904	10	ENSCAFG00000025159,ENSCAFG00000011124,ENSCAFG00000011098,ENSCAFG00000025128,DAD1,ABHD4,ENSCAFG00000011156,OXA1L,ENSCAFG00000011223,SLC7A7
249	ESt	20	30,496,776	30,918,758	421.983	0.0111369	0.279904	5	SNTN,SYNPR,ENSCAFG00000027258,ENSCAFG00000006896,ENSCAFG00000006900
250	Eur	9	49,563,673	49,985,248	421.576	0.0112529	0.279904	11	SMG6,LSM5,SRR,TSR1,ENSCAFG00000026040,ENSCAFG00000025963,SGSM2,MNT,METT10D,ENSCAFG00000026329,PAFAH1B1
251	BoC	5	6,361,572	6,782,936	421.365	0.0112529	0.279904	2	ENSCAFG00000021116,ENSCAFG00000026662
252	Dac	18	5,479,664	5,899,286	419.623	0.0112529	0.279904
253	EBD	8	21,400,782	21,819,953	419.172	0.0112529	0.279904	1	XM_534016.2
254	IrW	7	72,131,556	72,550,118	418.563	0.0112529	0.279904	5	METTL4,NDC80,ENSCAFG00000018409,ENSCAFG00000018412,ENSCAFG00000018420
255	Dac	11	30,002,381	30,420,453	418.073	0.0116009	0.279904	5	RANBP6,IL33,TPD52L3,ENSCAFG00000001368,ENSCAFG00000024502
256	BrS	13	45,292,048	45,709,390	417.343	0.0117169	0.279904	3	GABRA2,ENSCAFG00000024657,COX7B2
257	Bgl	6	42,020,965	42,437,711	416.747	0.0117169	0.279904	22	RPL3L,ENSCAFG00000019484,HS3ST6,C16orf73,FAHD1,HAGH,IGFALS,NUBP2,SPSB3,EME2,MRPS34,NME3,MAPK8IP3,HN1L,CRAMP1L,XM_547195.2,TMEM204,ENSCAFG00000028007,TELO2,PTX4,CLCN7,ENSCAFG00000019581
258	CoS	6	42,020,965	42,437,711	416.747	0.0117169	0.279904	22	RPL3L,ENSCAFG00000019484,HS3ST6,C16orf73,FAHD1,HAGH,IGFALS,NUBP2,SPSB3,EME2,MRPS34,NME3,MAPK8IP3,HN1L,CRAMP1L,XM_547195.2,TMEM204,ENSCAFG00000028007,TELO2,PTX4,CLCN7,ENSCAFG00000019581
259	Sci	12	32,812,156	33,228,560	416.405	0.011949	0.279904	1	ENSCAFG00000022225
260	Bgl	14	25,718,385	26,133,801	415.417	0.012065	0.279904	3	C1GALT1,COL28A1,MIOS
261	BeT	1	19,054,818	19,470,142	415.325	0.012065	0.279904	3	Q4JIV8_CANFA,ENSCAFG00000028239,ENSCAFG00000027273
262	Gry	2	80,709,265	81,124,247	414.983	0.012297	0.279904	6	ENSCAFG00000014958,EIF4G3,ENSCAFG00000021523,HP1BP3,SH2D5,KIF17
263	BoT	1	3,767,428	4,182,277	414.85	0.012297	0.279904	4	PQLC1,CTDP1,NFATC1,ATP9B
264	BrS	23	25,862,027	26,276,164	414.138	0.012413	0.279904	2	SGOL1,KAT2B
265	ShP	6	40,695,686	41,109,622	413.937	0.012413	0.279904	18	BTBD12,NLRC3,CLUAP1,C16orf90,NAT15,ZNF597,ZNF174,ZNF434,OR2C1,XM_845377.1,ENSCAFG00000023019,TIGD7,ZNF263,Q95N30_CANFA,ZNF200,ENSCAFG00000024340,ENSCAFG00000019304,XM_848219.1
266	FSp	10	10,707,193	11,121,003	413.811	0.012413	0.279904	4	WIF1,LEMD3,MSRB3,ENSCAFG00000027222
267	Gry	10	11,231,464	11,644,756	413.293	0.012413	0.279904	3	ENSCAFG00000022943,LLPH,TMBIM4
268	BeT	21	7,057,197	7,470,378	413.182	0.012413	0.279904	2	ENSCAFG00000027003,XM_543064.2
269	BoC	6	36,401,127	36,813,933	412.807	0.012413	0.279904	3	PMM2,ABAT,C16orf68
270	CoS	2	49,957,447	50,370,142	412.696	0.012413	0.279904	3	DEPDC1B,ELOVL7,ERCC8
271	GSl	22	3,757,620	4,170,111	412.492	0.012413	0.279904	2	GUCY1B2,RNASEH2B
272	ESt	25	27,639,197	28,051,255	412.059	0.012413	0.279904	4	ENSCAFG00000007864,FBXO8,KIAA1712,HPGD
273	ESt	25	33,372,486	33,784,450	411.965	0.012413	0.279904	2	ADA1A_CANFA,ENSCAFG00000024023
274	Rtw	17	8,081,260	8,493,165	411.906	0.012413	0.279904	1	ENSCAFG00000020813
275	BMD	25	7,271,327	7,683,215	411.889	0.012413	0.279904	5	SPG20,ENSCAFG00000006206,ENSCAFG00000027990,ENSCAFG00000024986,XM_534496.2
276	GSh	5	26,097,814	26,509,599	411.786	0.012413	0.279904	3	ENSCAFG00000022254,C11orf87,ENSCAFG00000027256
277	Dob	9	61,976,428	62,388,016	411.589	0.012413	0.279904	2	ENSCAFG00000020225,LHX2
278	Dob	2	80,733,586	81,145,040	411.455	0.012413	0.279904	6	ENSCAFG00000014958,EIF4G3,ENSCAFG00000021523,HP1BP3,SH2D5,KIF17
279	Dob	31	7,868,340	8,279,731	411.392	0.012413	0.279904
280	GSl	23	5,607,692	6,019,080	411.389	0.012413	0.279904	6	ABHD5,ENSCAFG00000011032,ANO10,ENSCAFG00000018259,ENSCAFG00000004484,SNRK
281	Gry	12	44,512,927	44,923,997	411.071	0.012413	0.279904
282	ESt	23	32,383,003	32,793,933	410.931	0.012413	0.279904	7	ACPP,ENSCAFG00000027418,DNAJC13,CCRL1,OTTHUMG00000159780,UBA5,NPHP3
283	BoT	35	14,610,043	15,020,882	410.84	0.012413	0.279904	3	HIVEP1,EDN1_CANFA,ENSCAFG00000023875
284	CoS	8	4,781,551	5,192,242	410.692	0.012413	0.279904	6	RIN3,LGMN,GOLGA5,CHGA,ITPK1,ENSCAFG00000027952
285	StP	28	31,369,553	31,779,462	409.91	0.012761	0.285739	2	RAB11FIP2,LOC477835
286	IrW	17	7,884,535	8,294,020	409.486	0.012761	0.285739	1	ENSCAFG00000026397
287	BoT	19	15,978,678	16,387,222	408.545	0.013109	0.291493	7	C4orf29,MFSD8,ENSCAFG00000022686,PLK4,HSPA4L,SLC25A31,INTU
288	Elk	14	13,047,286	13,455,335	408.05	0.013109	0.291493	1	ENSCAFG00000001744
289	Dac	X	104,782,415	105,190,089	407.675	0.0132251	0.293057	1	ENOX2
290	GSl	32	38,647,804	39,055,026	407.223	0.0133411	0.293596	2	ENSCAFG00000012283,ENSCAFG00000012288
291	Rtw	12	55,916,020	56,322,724	406.705	0.0133411	0.293596	1	ENSCAFG00000017465
292	BeT	15	32,567,886	32,974,348	406.463	0.0134571	0.295134	1	SCF_CANFA
293	BMD	21	28,811,273	29,216,409	405.137	0.0138051	0.30043	17	CLPB,ENSCAFG00000005724,PHOX2A,INPPL1,ENSCAFG00000005768,FOLR1,C11orf51,LRTOMT,C11orf59,LRRC51,NUMA1,Q3HTU6_CANFA,RNF121,ENSCAFG00000025764,XM_534024.2,ART5,ART1
294	NSD	7	3,956,381	4,361,271	404.891	0.0139211	0.30043	8	ELF3,RNPEP,TIMM17A,ENSCAFG00000025451,ENSCAFG00000010633,IPO9,ENSCAFG00000010671,NAV1
295	Elk	2	71,742,393	72,147,024	404.632	0.0140371	0.30043	18	BSDC1,TSSK3,MARCKSL1,HDAC1,LCK,ENSCAFG00000027687,FAM167B,ENSCAFG00000023364,EIF3I,C1orf91,DCDC2B,IQCC,CCDC28B,TXLNA,KPNA6,TMEM39B,KHDRBS1,PTP4A2
296	GoS	16	3,315,668	3,718,520	402.853	0.0142691	0.30043	1	TNS3
297	BoC	5	63,736,475	64,139,010	402.536	0.0142691	0.30043	1	ENSCAFG00000025869
298	Sci	24	16,588,948	16,991,147	402.2	0.0142691	0.30043	1	ENSCAFG00000025464
299	NSD	4	4,156,149	4,558,255	402.107	0.0142691	0.30043	1	ENSCAFG00000023795
300	BoT	1	3,212,349	3,614,089	401.741	0.0142691	0.30043	6	ENPP1,ENSCAFG00000000002,ENSCAFG00000000004,PARD6G,ENSCAFG00000000006,ADNP2
301	Sci	11	41,210,783	41,612,291	401.509	0.0142691	0.30043	2	ENSCAFG00000024032,ENSCAFG00000001581
302	ShP	7	26,187,254	26,588,678	401.425	0.0142691	0.30043	6	XM_547452.2,ENSCAFG00000023760,ENSCAFG00000021016,RFWD2,XM_855218.1,ENSCAFG00000028097
303	LRe	14	3,564,921	3,964,467	399.547	0.0143852	0.30043	12	ENSCAFG00000001153,TRIM11,OBSCN,C1orf69,GJC2,GUK1,MRPL55,C1orf35,ARF1,WNT3A,WNT9A,PRSS38
304	TYo	3	45,108,681	45,507,463	398.783	0.0143852	0.30043	2	ENSCAFG00000027994,ARRDC4
305	GoS	25	20,945,391	21,344,013	398.623	0.0143852	0.30043	4	ENSCAFG00000007321,ZMYM2,ZMYM5,PSPC1
306	Dob	23	50,449,475	50,847,940	398.466	0.0145012	0.30043	1	ENSCAFG00000022451
307	GRe	4	27,688,179	28,086,567	398.389	0.0145012	0.30043	5	VCL,AP3M1,ENSCAFG00000026456,ADK,ENSCAFG00000027937
308	TYo	10	9,506,695	9,904,595	397.901	0.0147332	0.30043	4	ENSCAFG00000028219,C16orf61,TMEM5,SRGAP1
309	BMD	10	4,305,790	4,703,539	397.75	0.0147332	0.30043	18	ENSCAFG00000000178,SHMT2,NDUFA4L2,STAC3,R3HDM2,INHBC,INHBE,GLI1,ARHGAP9,MARS,DDIT3,DCTN2,KIF5A,PIP4K2C,DTX3,ENSCAFG00000000250,SLC26A10,B4GALNT1
310	CoS	1	64,289,052	64,686,603	397.552	0.0147332	0.30043	1	ENSCAFG00000028093
311	BrS	8	37,827,034	38,224,477	397.444	0.0147332	0.30043	3	NP_001007132.1,ENSCAFG00000025007,ENSCAFG00000015585
312	Gry	X	62,772,795	63,169,974	397.18	0.0148492	0.30043	4	ENSCAFG00000017241,FGF16,ATRX,ENSCAFG00000017258
313	TYo	X	62,772,795	63,169,974	397.18	0.0148492	0.30043	4	ENSCAFG00000017241,FGF16,ATRX,ENSCAFG00000017258
314	Wei	10	35,185,828	35,581,061	395.234	0.0148492	0.30043	4	RFX4,POLR3B,TCP11L2,CKAP4
315	ESt	7	48,638,021	49,032,983	394.963	0.0149652	0.30043	1	ENSCAFG00000021711
316	LRe	32	32,340,525	32,735,468	394.944	0.0149652	0.30043	2	ENSCAFG00000024694,SEC24B
317	GSh	17	12,180,868	12,575,554	394.687	0.0149652	0.30043	2	TRIB2_CANFA,ENSCAFG00000028106
318	Elk	16	6,714,339	7,108,288	393.95	0.0149652	0.30043	1	ENSCAFG00000022418
319	BoC	4	55,466,546	55,860,428	393.883	0.0149652	0.30043	5	CLINT1,ENSCAFG00000022008,SOX30,THG1L,ADAM19
320	NSD	5	34,879,011	35,270,649	391.639	0.0155452	0.308042	26	ALOX15,ENSCAFG00000023009,ALOX12,RNASEK,C17orf49,cfa-mir-195,cfa-mir-497,BCL6B,SLC16A13,SLC16A11,ENSCAFG00000015980,ASGR2,ASGR1,DLG4,ACADVL,cfa-mir-324,DVL2,PHF23,GABARAP,DULLARD,C17orf81,CLDN7,GTR4_CANFA,YBX2,EIF5A,GPS2
321	StP	37	25,751,597	26,142,894	391.298	0.0156613	0.308042	4	MREG,PECR,XM_847688.1,XRCC5
322	EBD	8	51,620,135	52,011,057	390.923	0.0156613	0.308042	5	FLVCR2,C14orf1,TTLL5,Q2PPL2_CANFA,C14orf179
323	IrW	14	6,644,493	7,035,126	390.634	0.0156613	0.308042	2	ENSCAFG00000025266,ENSCAFG00000027503
324	EBD	11	25,299,438	25,690,067	390.63	0.0156613	0.308042	7	TCF7,SKP1,NP_001003063.1,CDKL3,UBE2B,CDKN2AIPNL,PHF15
325	ShP	13	4,712,609	5,102,985	390.377	0.0157773	0.308042	6	VPS13B,ENSCAFG00000024078,XM_532281.2,ENSCAFG00000000532,FBXO43,SPAG1
326	GRe	12	10,208,815	10,599,152	390.338	0.0157773	0.308042	5	ENSCAFG00000023191,ENSCAFG00000027765,XM_538898.2,GLO1,
327	BoT	25	13,739,473	14,129,546	390.074	0.0157773	0.308042	2	XM_543149.2,SLC46A3
328	TYo	3	56,954,200	57,344,170	389.971	0.0157773	0.308042	8	ALPK3,SLC28A1,ENSCAFG00000022842,ENSCAFG00000027545,RS17_CANFA,PDE8A,ENSCAFG00000027297,CPEB1
329	Bgl	6	43,803,989	44,193,880	389.892	0.0160093	0.309003	8	CHIA,DENND2D,CEPT1,DRAM2,C1orf103,ENSCAFG00000019771,CD53,Q70Z55_CANFA
330	BeT	10	11,169,956	11,559,700	389.745	0.0161253	0.309003	1	ENSCAFG00000022943
331	StP	9	33,743,749	34,133,373	389.625	0.0162413	0.309003	4	MMD,ENSCAFG00000017359,TMEM100,PCTP
332	GRe	10	43,058,076	43,447,427	389.352	0.0162413	0.309003	1	MFSD9
333	FSp	10	47,632,376	48,021,549	389.174	0.0162413	0.309003	3	TMEM131,ENSCAFG00000002368,B8XNP6_CANFA
334	BoC	5	64,841,941	65,230,874	388.934	0.0163573	0.309003	5	SLC45A1,ENSCAFG00000019688,ENSCAFG00000023803,XM_546758.2,ENSCAFG00000019691
335	StP	1	98,267,611	98,656,074	388.464	0.0163573	0.309003	3	ROR2,XP_850349.1,NFIL3
336	LRe	2	57,457,513	57,845,878	388.366	0.0163573	0.309003	4	SMN_CANFA,BDP1,MCCC2,CARTPT
337	GRe	3	65,151,281	65,539,565	388.285	0.0163573	0.309003	7	ENSCAFG00000027463,TACC3,TMEM129,SLBP,FAM53A,KIAA1530,MAEA
338	Rtw	15	43,149,377	43,537,614	388.238	0.0163573	0.309003	6	ANO4,SLC5A8,UTP20,ARL1,SPIC,MYBPC1
339	BMD	10	7,261,865	7,650,089	388.225	0.0163573	0.309003
340	Eur	20	5,799,187	6,187,067	387.881	0.0165893	0.312464	11	H1FX,C3orf37,COPG,CNBP,ISY1,ENSCAFG00000024835,GP9,ENSCAFG00000004343,KIAA1257,ENSCAFG00000004347,ACAD9
341	Dob	4	27,101,479	27,488,479	387.001	0.0169374	0.312483	14	TTC18,ANXA7,ENSCAFG00000021204,ZMYND17,PPP3CB,USP54,Q1AG03_CANFA,SYNPO2L,SEC24C,FUT11,CHCHD1,KIAA0913,NDST2,CAMK2G
342	NSD	32	38,174,356	38,561,290	386.935	0.0169374	0.312483
343	Wei	22	9,730,303	10,117,018	386.716	0.0170534	0.312483	2	C13orf31,CCDC122
344	GoS	15	23,191,944	23,578,610	386.667	0.0170534	0.312483	1	ENSCAFG00000005722
345	IrW	24	3,634,953	4,021,146	386.194	0.0171694	0.312483	4	XM_542863.2,ENSCAFG00000026706,ENSCAFG00000005162,FOXA2
346	Wei	11	27,780,358	28,166,384	386.027	0.0171694	0.312483	1	ENSCAFG00000001121
347	StP	23	5,646,825	6,032,122	385.298	0.0171694	0.312483	4	ANO10,ENSCAFG00000018259,ENSCAFG00000004484,SNRK
348	ESt	10	11,260,040	11,644,756	384.717	0.0172854	0.312483	3	ENSCAFG00000022943,LLPH,TMBIM4
349	GoS	10	11,260,040	11,644,756	384.717	0.0172854	0.312483	3	ENSCAFG00000022943,LLPH,TMBIM4
350	GRe	10	11,260,040	11,644,756	384.717	0.0172854	0.312483	3	ENSCAFG00000022943,LLPH,TMBIM4
351	CoS	10	11,260,040	11,644,756	384.717	0.0172854	0.312483	3	ENSCAFG00000022943,LLPH,TMBIM4
352	TYo	24	11,331,804	11,716,403	384.6	0.0172854	0.312483	3	FLRT3,SEL1L2,
353	NSD	13	40,590,170	40,974,602	384.433	0.0172854	0.312483	32	OPLAH,EXOSC4,GPAA1,CYC1,SHARPIN,MAF1,ENSCAFG00000001540,ENSCAFG00000001541,ENSCAFG00000001542,ENSCAFG00000025328,XM_539211.2,ENSCAFG00000001554,ENSCAFG00000001559,HSF1,DGAT1,ENSCAFG00000001573,FBXL6,ENSCAFG00000001588,ADCK5,CPSF1,ENSCAFG00000001607,VPS28,
354	BoC	X	109,924,950	110,309,025	384.076	0.0174014	0.312483	10	HTATSF1,VGLL1,ENSCAFG00000027466,ENSCAFG00000022673,ENSCAFG00000024096,CD40L_CANFA,ARHGEF6,ENSCAFG00000018962,ENSCAFG00000025947,XM_849698.1
355	NSD	32	35,823,169	36,207,105	383.937	0.0175174	0.312483	4	XM_846443.1,ANK2,CAMK2D,ENSCAFG00000012153
356	Rtw	19	8,977,932	9,361,711	383.78	0.0175174	0.312483
357	BoT	1	104,290,707	104,674,228	383.522	0.0175174	0.312483	11	XM_541386.2,XM_541387.1,XM_848761.1,XM_548675.2,ENSCAFG00000002453,ENSCAFG00000021551,ZNF707,XM_848788.1,ENSCAFG00000002476,ZNF582,ENSCAFG00000024243
358	BMD	2	58,590,846	58,974,319	383.474	0.0175174	0.312483	4	TNPO1,FCHO2,ENSCAFG00000023382,TMEM174
359	StP	3	92,551,164	92,934,377	383.214	0.0175174	0.312483
360	EBD	26	8,190,810	8,573,105	382.296	0.0178654	0.315241	2	Q2EFX7_CANFA,FAM101A
361	StP	16	14,224,118	14,606,355	382.238	0.0178654	0.315241	4	PTN,ENSCAFG00000028373,O77694_CANFA,cfa-mir-490
362	NFd	22	21,182,267	21,564,223	381.957	0.0179814	0.315241
363	Bgl	18	9,841,876	10,223,482	381.607	0.0182135	0.315241	5	MRPL32,PSMA2,C7orf25,,HECW1
364	Wei	19	9,374,835	9,756,379	381.545	0.0182135	0.315241
365	ESt	21	28,835,115	29,216,409	381.295	0.0182135	0.315241	16	CLPB,PHOX2A,INPPL1,ENSCAFG00000005768,FOLR1,C11orf51,LRTOMT,C11orf59,LRRC51,NUMA1,Q3HTU6_CANFA,RNF121,ENSCAFG00000025764,XM_534024.2,ART5,ART1
366	Dac	18	13,960,155	14,341,286	381.132	0.0182135	0.315241	1	AMPH
367	Wei	20	24,852,331	25,233,305	380.975	0.0182135	0.315241	1	Q864F3_CANFA
368	GRe	16	28,050,316	28,430,425	380.11	0.0182135	0.315241	6	C8orf4,ENSCAFG00000027291,IDO2,IDO1,ENSCAFG00000005753,ENSCAFG00000005758
369	Dac	1	102,606,654	102,986,732	380.079	0.0182135	0.315241	13	XM_541340.2,ENSCAFG00000002363,RPS5,ZNF837,A1BG,ZNF8,ZNF274,ENSCAFG00000028331,XM_848460.1,ZSCAN18,ZNF135,ENSCAFG00000008539,ENSCAFG00000023344
370	NSD	21	40,054,378	40,434,005	379.628	0.0182135	0.315241	4	SPON1,RRAS2,COPB1,LOC612667
371	Rtw	15	46,203,550	46,582,508	378.959	0.0184455	0.31754	1	HHIP
372	IrW	36	23,095,167	23,473,988	378.822	0.0184455	0.31754	1	MTX2
373	GRe	5	67,737,551	68,116,090	378.54	0.0185615	0.317828	2	ZC3H18,ZNF469
374	BrS	29	9,535,176	9,913,450	378.275	0.0185615	0.317828	1	XKR4
375	ShP	6	28,833,933	29,211,506	377.574	0.0187935	0.319224	5	TMC5,TMC7,COQ7,ITPRIPL2,XM_536956.2
376	Rtw	37	23,048,619	23,426,155	377.537	0.0187935	0.319224
377	IrW	29	12,803,024	13,180,012	376.989	0.0189095	0.319224	1	TOX
378	ESt	9	4,059,047	4,436,023	376.977	0.0189095	0.319224	5	RPTOR,ENSCAFG00000027033,NPTX1,XM_845456.1,ENSCAFG00000005675
379	Gry	3	16,198,306	16,575,267	376.962	0.0189095	0.319224	2	ENSCAFG00000027555,ELL2
380	GoS	23	19,594,740	19,971,600	376.861	0.0190255	0.319224	4	ENSCAFG00000024704,XM_542756.2,NEK10,ENSCAFG00000025940
381	GRe	23	36,392,516	36,769,290	376.775	0.0190255	0.319224	6	NCK1,ENSCAFG00000026307,ENSCAFG00000007458,IL20RB,TRAF3IP2,EEF2
382	Sci	17	24,990,731	25,367,109	376.379	0.0191415	0.319224	1	BRE
383	BoC	22	7,910,413	8,286,745	376.333	0.0191415	0.319224	6	LRRC63,LCP1,CPB2,ENSCAFG00000004511,ENSCAFG00000025204,SIAH3
384	Gry	30	6,448,791	6,824,731	375.941	0.0191415	0.319224
385	Rtw	26	40,268,983	40,644,279	375.297	0.0192575	0.320325	4	ENSCAFG00000015602,ENSCAFG00000027831,SGMS1,ENSCAFG00000022516
386	Bgl	13	30,650,656	31,025,649	374.994	0.0193735	0.321419	2	ADCY8,ENSCAFG00000026983
387	Dac	12	36,242,951	36,617,778	374.828	0.0194896	0.322437	2	A1EAA2_CANFA,B3GA2_CANFA
388	BoT	15	53,164,028	53,537,861	373.834	0.0197216	0.322437	4	FBXW7,ENSCAFG00000021451,ENSCAFG00000008160,TMEM154
389	Sci	1	96,088,296	96,461,676	373.381	0.0197216	0.322437	12	C9orf68,PPAPDC2,CDC37L1,XM_533543.2,ENSCAFG00000002085,RCL1,ENSCAFG00000027229,cfa-mir-101-2,ENSCAFG00000021196,ENSCAFG00000023391,ENSCAFG00000027926,JAK2
390	LRe	17	59,402,056	59,775,314	373.259	0.0197216	0.322437	6	HAO2,3BHS_CANFA,ZNF697,LOC608055,HMGCS2,ENSCAFG00000010105
391	LRe	1	17,387,817	17,761,026	373.21	0.0197216	0.322437	6	ZCCHC2,TNFRSF11A,KIAA1468,ENSCAFG00000000081,ENSCAFG00000027095,Q6JDI5_CANFA
392	EBD	23	5,646,825	6,019,080	372.256	0.0198376	0.322437	4	ANO10,ENSCAFG00000018259,ENSCAFG00000004484,SNRK
393	Elk	30	23,409,285	23,780,844	371.56	0.0198376	0.322437	6	ENSCAFG00000028183,RSL24D1,RB27A_CANFA,ENSCAFG00000027979,CCPG1,cfa-mir-628
394	StP	16	9,231,481	9,602,938	371.458	0.0198376	0.322437	14	EPHA1,ZYX,FAM131B,CLCN1_CANFA,CASP2,TMEM139,XM_532742.2,Q2ABD0_CANFA,Q2ABD1_CANFA,PIP,ENSCAFG00000003650,OR6V1,OR9A2,KEL
395	Dac	30	4,934,968	5,306,135	371.168	0.0199536	0.323501	4	ENSCAFG00000008199,GREM1,SCG5,ENSCAFG00000008236
396	BMD	6	64,082,509	64,452,973	370.465	0.0201856	0.326436	4	HS2ST1,XM_850222.1,ENSCAFG00000016674,ENSCAFG00000020238
397	BMD	5	54,789,239	55,158,719	369.481	0.0204176	0.326886
398	Rtw	2	74,189,421	74,558,793	369.373	0.0204176	0.326886	6	PTPRU,MECR,ENSCAFG00000021599,SFRS4,XM_849712.1,EPB41
399	Bgl	13	31,066,269	31,435,535	369.267	0.0204176	0.326886	1	ENSCAFG00000001098
400	Dac	1	65,473,483	65,842,534	369.052	0.0204176	0.326886	1	TRDN_CANFA
401	Eur	1	64,265,011	64,633,495	368.485	0.0205336	0.327923	1	ENSCAFG00000028093
402	BoC	17	28,606,018	28,974,192	368.175	0.0206497	0.328957	4	ENSCAFG00000005757,YIPF4,BIRC6,TTC27
403	NSD	11	48,952,831	49,319,964	367.134	0.0209977	0.331205	2	ENSCAFG00000001727,ENSCAFG00000025789
404	Dob	16	24,864,250	25,231,340	367.091	0.0209977	0.331205	4	ENSCAFG00000005325,ENSCAFG00000009953,SH2D4A,CSGALNACT1
405	BrS	37	14,235,328	14,602,407	367.08	0.0209977	0.331205	9	NOP58,ENSCAFG00000026205,ENSCAFG00000026161,ENSCAFG00000027576,ENSCAFG00000027602,ENSCAFG00000022013,BMPR2,ENSCAFG00000026714,FAM117B
406	GoS	29	30,469,993	30,837,063	367.071	0.0209977	0.331205	1	ZBTB10
407	TYo	7	46,582,565	46,949,061	366.497	0.0211137	0.332217	1	SMAD2
408	Rtw	12	19,761,156	20,127,559	366.404	0.0212297	0.332408	1	XM_847438.1
409	Sci	5	27,760,860	28,127,099	366.24	0.0212297	0.332408	5	ELMOD1,ENSCAFG00000025897,ALKBH8,ENSCAFG00000014718,XM_536589.2
410	NFd	6	17,874,297	18,240,385	366.089	0.0213457	0.332598	5	SNX8,NUDT1,FTSJ2,ENSCAFG00000024470,MAD1L1
411	BoC	11	30,653,884	31,019,918	366.035	0.0213457	0.332598	4	ENSCAFG00000001422,ENSCAFG00000024844,ENSCAFG00000024825,ENSCAFG00000001434
412	NFd	18	5,479,664	5,845,556	365.893	0.0214617	0.333594
413	IrW	35	12,205,658	12,571,474	365.817	0.0215777	0.333777	1	OFCC1
414	LRe	32	30,063,577	30,429,080	365.504	0.0215777	0.333777	1	ENSCAFG00000011074
415	Dac	18	19,309,301	19,674,626	365.326	0.0216937	0.334763	2	ENSCAFG00000004153,RELN
416	JRT	28	26,467,522	26,832,789	365.268	0.0218097	0.335287	3	ACSL5,ZDHHC6,VTI1A
417	GSh	19	21,247,968	21,612,834	364.867	0.0220418	0.335287	5	TRPC3,BBS7,CCNA2,EXOSC9,ANXA5
418	GoS	10	7,261,865	7,625,680	363.816	0.0220418	0.335287
419	Wei	10	25,210,626	25,574,436	363.811	0.0220418	0.335287	6	SCUBE1,TTLL12,TSPO,MCAT,BIK,TTLL1
420	Bgl	22	6,429,069	6,792,861	363.793	0.0220418	0.335287	3	ENSCAFG00000004456,XM_542567.1,ENSCAFG00000025917
421	GoS	11	48,054,058	48,417,764	363.707	0.0220418	0.335287	8	C9orf82,PLAA,IFT74,LRRC19,cfa-mir-872,ENSCAFG00000028264,Q9MYX5_CANFA,ENSCAFG00000001714
422	Bgl	4	37,257,899	37,620,144	362.246	0.0226218	0.343294	4	cfa-mir-346,WAPAL,OPN4,LDB3
423	Bgl	13	4,740,978	5,102,985	362.008	0.0227378	0.343427	6	VPS13B,ENSCAFG00000024078,XM_532281.2,ENSCAFG00000000532,FBXO43,SPAG1
424	ESt	6	44,176,909	44,538,337	361.429	0.0227378	0.343427	5	Q70Z55_CANFA,XP_854517.1,ENSCAFG00000019775,KCNA3,KCNA2_CANFA
425	NSD	5	63,188,144	63,549,364	361.221	0.0229698	0.344493	12	ACOT7,HES2,ESPN,TNFRSF25,PLEKHG5,NOL9,TAS1R1,ZBTB48,KLHL21,PHF13,THAP3,DNAJC11
426	EBD	16	23,926,737	24,287,496	360.76	0.0229698	0.344493	1	VIPR2
427	EBD	7	36,576,587	36,937,321	360.735	0.0229698	0.344493
428	Dac	23	25,883,180	26,243,359	360.18	0.0234339	0.346811	2	SGOL1,KAT2B
429	BeT	22	6,002,862	6,362,926	360.065	0.0234339	0.346811	5	Q9N122_CANFA,ITM2B,ENSCAFG00000022103,XM_849424.1,NUDT15
430	LRe	1	110,741,615	111,101,322	359.708	0.0234339	0.346811	11	KDELR1,SYNGR4,TMEM143,EMP3,CCDC114,ZNF114,C19orf68,LIG1,CABP5,ESPB1_CANFA,BSPH1
431	Dob	25	13,282,199	13,641,219	359.021	0.0236659	0.346811	2	SLC7A1,MTUS2
432	NFd	15	35,025,497	35,384,298	358.802	0.0236659	0.346811	1	ENSCAFG00000006152
433	BoT	11	36,226,618	36,585,418	358.801	0.0236659	0.346811	2	Q95J87_CANFA,C9orf150
434	StP	13	11,150,514	11,509,194	358.681	0.0236659	0.346811	2	ANGP1_CANFA,ENSCAFG00000021358
435	BoT	13	11,150,514	11,509,194	358.681	0.0236659	0.346811	2	ANGP1_CANFA,ENSCAFG00000021358
436	GSh	1	101,971,091	102,329,195	358.105	0.0236659	0.346811	10	ENSCAFG00000024350,ASPN,OMD,OGN,ENSCAFG00000022245,NOL8,ENSCAFG00000028066,IARS,ENSCAFG00000002343,ENSCAFG00000002346
437	NSD	12	33,121,745	33,479,636	357.892	0.0236659	0.346811
438	BeT	19	44,490,776	44,848,547	357.772	0.0237819	0.347715
439	GSh	10	13,998,098	14,355,368	357.271	0.0238979	0.348615	3	CPSF6,LYSC2_CANFA,YEATS4
440	Sci	10	9,547,807	9,904,595	356.789	0.0242459	0.351229	4	ENSCAFG00000028219,C16orf61,TMEM5,SRGAP1
441	LRe	12	49,636,369	49,993,032	356.664	0.024478	0.351229	9	ZNF292,GJB7,ENSCAFG00000002351,C6orf162,C6orf163,ENSCAFG00000024268,XM_532227.2,NP_001003058.1,RARS2
442	StP	9	32,870,416	33,226,373	355.958	0.024478	0.351229	1	ENSCAFG00000025922
443	Sci	38	17,403,105	17,758,772	355.668	0.024594	0.351229	2	SLC30A10,EPRS
444	ESt	22	14,773,642	15,128,790	355.149	0.02471	0.351229	2	ENSCAFG00000027954,ENSCAFG00000026195
445	Elk	2	77,482,903	77,836,332	353.43	0.02471	0.351229	3	ENSCAFG00000027966,Q5XTY6_CANFA,CLIC4
446	BrS	11	42,973,349	43,326,235	352.887	0.02471	0.351229	2	MLLT3,ENSCAFG00000027375
447	GSh	5	4,874,678	5,227,328	352.651	0.02471	0.351229
448	GSl	21	42,970,507	43,322,859	352.353	0.024826	0.351229	7	ENSCAFG00000027538,NUCB2,ENSCAFG00000026299,Q5BMM8_CANFA,Q5BNC2_CANFA,USH1C,OTOG
449	NSD	11	34,292,102	34,644,184	352.083	0.024826	0.351229	1	ENSCAFG00000027467
450	Elk	15	32,622,324	32,974,348	352.025	0.024826	0.351229	1	SCF_CANFA
451	Bgl	30	4,487,889	4,839,457	351.569	0.024826	0.351229	3	ENSCAFG00000024238,TMCO5B,ENSCAFG00000008199
452	Elk	32	9,540,220	9,891,609	351.39	0.024942	0.351229	7	SCD5,H3F3C,ENSCAFG00000008989,SEC31A,ENSCAFG00000026919,Q59AC2_CANFA,LIN54
453	Dob	20	39,478,879	39,830,252	351.374	0.025058	0.351229	5	ENSCAFG00000024589,DCP1A,TKT,KPCD_CANFA,RFT1
454	BoC	4	74,536,905	74,888,173	351.269	0.025058	0.351229	10	XP_536500.2,ENSCAFG00000027699,ENSCAFG00000025937,ENSCAFG00000027161,XM_536500.2,ENSCAFG00000028037,ENSCAFG00000018685,C5orf42,NIPBL,ENSCAFG00000027780
455	GRe	28	30,403,737	30,754,905	351.169	0.025058	0.351229	5	ENO4,KIAA1598,VAX1,KCNK18,SLC18A2
456	StP	31	36,002,624	36,353,674	351.051	0.025058	0.351229	2	PSMG1,BRWD1
457	Rtw	31	22,850,080	23,201,029	350.95	0.025174	0.351229
458	FSp	22	5,586,879	5,937,680	350.802	0.025174	0.351229	1	CYSLTR2
459	IrW	2	22,189,572	22,540,348	350.777	0.025174	0.351229	5	PTPLA_CANFA,A2VBC3_CANFA,ENSCAFG00000027355,A3RLY4_CANFA,TRDMT1
460	FSp	13	40,895,102	41,245,034	349.933	0.0256381	0.356927	16	CYHR1,KIFC2,FOXH1,PPP1R16A,GPT,MFSD3,RECQL4,LRRC14,LRRC24,ARHGAP39,COMMD5,ZNF7,ENSCAFG00000024976,RPL8,ENSCAFG00000001679,ZN252_CANFA
461	FSp	14	26,102,631	26,451,648	349.018	0.0261021	0.362598	1	MIOS
462	BoT	19	11,427,667	11,776,562	348.896	0.0262181	0.363421	2	ENSCAFG00000003779,PCDH10
463	BMD	22	21,182,267	21,531,070	348.804	0.0263341	0.364241
464	Gry	9	5,928,592	6,276,407	347.816	0.0265661	0.366658	8	BIRC5_CANFA,AFMID,TK1,XM_846212.1,C17orf99,TMC8,TMC6,ENSCAFG00000005224
465	GRe	19	51,790,143	52,137,664	347.522	0.0267981	0.368273
466	Gry	9	59,966,111	60,313,580	347.47	0.0267981	0.368273	5	Q865U7_CANFA,ENSCAFG00000023311,ENSCAFG00000020172,ENSCAFG00000027902,ENSCAFG00000007185
467	BoT	14	57,087,497	57,434,825	347.329	0.0270302	0.370667	1	MDFIC
468	TYo	11	29,874,625	30,221,624	347	0.0271462	0.371462	3	Q864R3_CANFA,KIAA2026,RANBP6
469	IrW	13	10,819,921	11,166,724	346.804	0.0273782	0.371462	4	ENSCAFG00000000684,XM_844664.1,ANGP1_CANFA,ENSCAFG00000021358
470	IrW	13	3,036,181	3,382,975	346.795	0.0273782	0.371462	7	LAPTM4B,MATN2,XM_843126.1,ENSCAFG00000025847,C8orf47,HRSP12,POP1
471	GSh	15	37,340,659	37,687,448	346.79	0.0273782	0.371462	3	PLXNC1,CCDC41,TMCC3
472	IrW	3	44,592,607	44,939,293	346.687	0.0273782	0.371462	1	Q6QHH2_CANFA
473	GSh	2	49,177,303	49,522,684	345.382	0.0280742	0.379298	1	cfa-mir-582
474	BMD	8	61,251,030	61,596,374	345.345	0.0280742	0.379298	1	ENSCAFG00000026948
475	Elk	11	34,299,001	34,644,184	345.184	0.0281903	0.380065	1	ENSCAFG00000027467
476	BoT	1	56,887,403	57,231,934	344.532	0.0284223	0.38071	3	ENSCAFG00000023764,ENSCAFG00000026487,BRAC_CANFA
477	ShP	17	21,832,990	22,176,549	343.56	0.0285383	0.38071	4	NCOA1,C2orf79,CENPO,ADCY3
478	CoS	2	77,307,859	77,651,286	343.428	0.0285383	0.38071	7	MACOI_CANFA,Q3BCQ6_CANFA,TMEM50A,C1orf63,ENSCAFG00000012898,ENSCAFG00000012895,ENSCAFG00000027966
479	BoC	5	7,711,426	8,054,776	343.351	0.0285383	0.38071	8	APLP2,ENSCAFG00000010143,ENSCAFG00000021820,ENSCAFG00000022320,PRDM10,NFRKB,TMEM45B,ENSCAFG00000028187
480	ESt	22	4,643,309	4,986,624	343.316	0.0286543	0.38071	7	ENSCAFG00000027090,C13orf1,ENSCAFG00000020963,cfa-mir-15a,cfa-mir-16-1,KCNRG,TRIM13
481	GSh	17	11,405,688	11,748,842	343.155	0.0286543	0.38071	1	LPIN1
482	GRe	20	55,400,828	55,743,775	342.948	0.0286543	0.38071	19	XAB2,XM_849207.1,PCP2,STXB2_CANFA,RETN,C19orf59,TRAPPC5,CLEC4G,B3V3S6_CANFA,EVI5L,XM_542120.2,ENSCAFG00000023512,LRRC8E,ENSCAFG00000018328,CTXN1,TIMM44,ELAVL1,CCL25_CANFA,FBN3
483	ESt	2	39,864,592	40,207,359	342.768	0.0288863	0.382998	2	NDFIP1,SPRY4
484	BrS	35	12,316,625	12,659,271	342.647	0.0291183	0.385276	1	OFCC1
485	JRT	24	11,388,903	11,731,127	342.225	0.0292343	0.385836	1	SEL1L2
486	NSD	5	48,960,515	49,302,350	341.836	0.0294664	0.385836	2	ROR1,ENSCAFG00000027327
487	Dac	18	17,913,316	18,255,035	341.72	0.0295824	0.385836	4	PUS7,SRPK2,ENSCAFG00000026537,MLL5
488	Gry	30	7,696,912	8,038,496	341.585	0.0295824	0.385836	1	XM_535426.2
489	Bgl	24	25,600,559	25,942,049	341.491	0.0295824	0.385836	9	SNTA1,CBFA2T2,NECAB3,C20orf134,E2F1,PXMP4,ENSCAFG00000026300,ENSCAFG00000007447,ZNF341
490	BrS	X	82,024,168	82,365,508	341.341	0.0295824	0.385836	1	ENSCAFG00000017859
491	ESt	X	82,024,168	82,365,508	341.341	0.0295824	0.385836	1	ENSCAFG00000017859
492	BoT	25	28,094,765	28,435,891	341.127	0.0298144	0.38638	3	GLRA3,ENSCAFG00000007918,ADAM29
493	EBD	3	79,302,715	79,643,568	340.854	0.0298144	0.38638
494	TYo	3	55,319,424	55,660,225	340.802	0.0299304	0.38638	9	RHCG_CANFA,C15orf42,KIF7,PLIN1,PEX11A,WDR93,ENSCAFG00000028344,MESP1,AMPN_CANFA
495	BMD	1	91,677,095	92,017,506	340.412	0.0299304	0.38638	3	PIP5K1B,C9orf71,PGM5
496	Rtw	8	47,903,947	48,244,094	340.148	0.0300464	0.38638	1	SIPA1L1
497	EBD	1	55,338,437	55,678,494	340.058	0.0300464	0.38638
498	GSl	15	42,942,483	43,282,459	339.977	0.0300464	0.38638	2	ANO4,SLC5A8
499	GSl	14	21,413,957	21,753,771	339.815	0.0301624	0.387094	5	ENSCAFG00000002007,ENSCAFG00000002009,HEPACAM2,CCDC132,ENSCAFG00000028301
500	Wei	22	23,983,600	24,323,187	339.588	0.0303944	0.389291	1	ENSCAFG00000024364
501	Bgl	13	54,954,890	55,294,151	339.262	0.0305104	0.389997	1	ENSCAFG00000027785
502	Dob	3	73,446,002	73,784,960	338.959	0.0307425	0.390549	3	ENSCAFG00000015725,EVC2,EVC
503	StP	11	12,843,841	13,182,706	338.866	0.0307425	0.390549	2	PRR16,XM_538597.2
504	TYo	15	44,140,137	44,478,690	338.554	0.0308585	0.390549	1	IGF1_CANFA
505	Sci	15	44,140,137	44,478,690	338.554	0.0308585	0.390549	1	IGF1_CANFA
506	JRT	1	45,975,317	46,313,610	338.294	0.0308585	0.390549	5	VIP_CANFA,ENSCAFG00000000540,FBXO5,MTRF1L,RGS17
507	CoS	26	14,286,156	14,624,228	338.073	0.0310905	0.391936	1	TBX5
508	Sci	31	18,334,601	18,672,670	338.07	0.0310905	0.391936	1	ENSCAFG00000008372
509	GoS	5	44,847,121	45,184,489	337.369	0.0314385	0.394678	9	PEMT,ENSCAFG00000026606,ENSCAFG00000018534,RASD1,MED9,NT5M,ENSCAFG00000001949,COPS3,B1NLQ8_CANFA
510	BeT	19	44,869,988	45,207,083	337.096	0.0315545	0.394678
511	GSh	19	31,610,037	31,947,042	337.006	0.0315545	0.394678	4	ENSCAFG00000026842,CLASP1,O18986_CANFA,TFCP2L1
512	ShP	13	4,317,608	4,654,445	336.838	0.0315545	0.394678	4	VPS13B,ENSCAFG00000025782,cfa-mir-599,cfa-mir-875
513	StP	13	3,290,838	3,627,320	336.483	0.0319026	0.394764	9	MATN2,XM_843126.1,ENSCAFG00000025847,C8orf47,HRSP12,POP1,NIPAL2,ENSCAFG00000018581,KCNS2
514	BMD	21	34,731,966	35,068,361	336.396	0.0319026	0.394764	4	TUB,RIC3,LMO1,STK33
515	Rtw	24	25,584,851	25,921,243	336.393	0.0319026	0.394764	10	ENSCAFG00000007403,SNTA1,CBFA2T2,NECAB3,C20orf134,E2F1,PXMP4,ENSCAFG00000026300,ENSCAFG00000007447,ZNF341
516	CoS	17	13,054,147	13,390,423	336.277	0.0319026	0.394764	1	ENSCAFG00000003645
517	NFd	7	17,087,326	17,423,537	336.212	0.0319026	0.394764	4	XPR1,ENSCAFG00000022887,KIAA1614,STX6
518	BoC	4	74,900,481	75,236,654	336.174	0.0320186	0.394764	2	NIPBL,NP_001003136.1
519	NFd	11	42,580,732	42,916,888	336.157	0.0320186	0.394764	3	ENSCAFG00000021662,ENSCAFG00000027821,ENSCAFG00000026513
520	LRe	11	48,274,353	48,609,921	335.569	0.0321346	0.394764	5	IFT74,Q9MYX5_CANFA,ENSCAFG00000001714,C9orf11,MOBKL2B
521	CoS	24	26,824,672	27,159,958	335.287	0.0323666	0.394764	10	NCOA6,GGT7,ACSS2,Q6PXD9_CANFA,MYH7B,cfa-mir-499,TRPC4AP,ENSCAFG00000007920,EDEM2,PROCR
522	Bgl	15	18,710,474	19,045,746	335.273	0.0323666	0.394764	3	ENSCAFG00000023678,ERI3,ENSCAFG00000027864
523	BrS	2	29,985,643	30,320,901	335.259	0.0323666	0.394764
524	Dob	6	3,645,062	3,980,304	335.243	0.0323666	0.394764	7	ENSCAFG00000016564,XM_843392.1,BGLR_CANFA,ENSCAFG00000010200,XM_536832.2,CRCP,TPST1
525	Wei	6	3,645,062	3,980,304	335.243	0.0323666	0.394764	7	ENSCAFG00000016564,XM_843392.1,BGLR_CANFA,ENSCAFG00000010200,XM_536832.2,CRCP,TPST1
526	EBD	5	36,817,650	37,152,828	335.179	0.0324826	0.394764	4	ENSCAFG00000023041,STX8,WDR16,USP43
527	BrS	5	62,791,093	63,126,048	334.956	0.0325986	0.394764	6	B5LBI2_CANFA,KCNAB2,CHD5,RPL22,RNF207,ICMT
528	IrW	24	3,214,236	3,548,953	334.718	0.0327146	0.394764	3	NAPB,GZF1,NXT1
529	Wei	16	26,031,610	26,366,215	334.606	0.0328306	0.394764	6	C8orf40,SLC20A2,VDAC3,DKK4,Q5SBJ1_CANFA,IKBKB
530	BoC	23	26,158,345	26,492,544	334.2	0.0328306	0.394764	5	SGOL1,KAT2B,C3orf48,RAB5A_CANFA,EFHB
531	BoT	5	66,926,250	67,260,410	334.161	0.0329466	0.394764	7	CPNE7,RPL13,ENSCAFG00000021886,SPG7,ANKRD11,ENSCAFG00000019845,CDH15
532	Sci	13	50,448,811	50,782,921	334.111	0.0329466	0.394764	4	ENSCAFG00000002090,TMEM165,CLOCK,PDCL2
533	Dac	22	53,089,208	53,423,075	333.868	0.0330626	0.394764	6	PCCA,ENSCAFG00000027654,ENSCAFG00000023761,ENSCAFG00000005851,A2LD1,HNRPDL
534	Dac	6	24,498,758	24,832,147	333.39	0.0331787	0.394764	3	RBBP6,CACNG3,PRKCB
535	Rtw	11	58,333,175	58,666,558	333.384	0.0331787	0.394764	5	NANS,TRIM14,CORO2A,TBC1D2,GABBR2
536	BeT	16	33,390,331	33,723,676	333.346	0.0331787	0.394764
537	EBD	8	22,253,610	22,586,688	333.079	0.0332947	0.394764	1	ENSCAFG00000013946
538	BrS	3	44,606,365	44,939,293	332.929	0.0332947	0.394764	1	Q6QHH2_CANFA
539	NFd	28	27,214,252	27,547,106	332.855	0.0332947	0.394764	2	HABP2,NRAP
540	BeT	24	26,157,008	26,489,797	332.79	0.0334107	0.394764	8	RALY,ENSCAFG00000021644,EIF2S2,Q2LIQ4_CANFA,ENSCAFG00000024610,AHCY,XM_847433.1,ENSCAFG00000027271
541	LRe	11	57,184,707	57,517,455	332.749	0.0334107	0.394764	4	ENSCAFG00000002395,SHB,ENSCAFG00000028415,ENSCAFG00000002399
542	StP	9	30,441,444	30,774,122	332.679	0.0334107	0.394764	2	UTP18,ENSCAFG00000020753
543	JRT	31	5,411,409	5,743,896	332.488	0.0335267	0.395405	1	RPL7A
544	GoS	3	93,955,329	94,287,447	332.119	0.0337587	0.396588	8	ANAPC13,LCORL,NCAPG,DCAF16,CTBP1,ENSCAFG00000024138,SPON2,G25L_CANFA
545	TYo	3	37,228,125	37,559,875	331.751	0.0338747	0.396588	3	ENSCAFG00000024812,ENSCAFG00000010050,ENSCAFG00000010065
546	Eur	15	23,726,439	24,058,023	331.585	0.0338747	0.396588	1	NAV3
547	LRe	3	90,953,280	91,284,844	331.565	0.0338747	0.396588
548	GSh	3	72,453,034	72,784,438	331.405	0.0339907	0.397033	7	DRD5,OTOP1,TMEM128,ENSCAFG00000015675,ZNF509,NSG1,STX18
549	Wei	11	5,166,275	5,497,416	331.142	0.0341067	0.397033	2	ENSCAFG00000028158,ADAMTS2
550	ESt	25	22,268,464	22,599,206	330.743	0.0342227	0.397033	2	PALLD,CBR4
551	TYo	2	64,665,533	64,996,185	330.653	0.0342227	0.397033	2	FTO,RPGRIP1L
552	Elk	2	64,665,533	64,996,185	330.653	0.0342227	0.397033	2	FTO,RPGRIP1L
553	BrS	3	39,112,556	39,443,093	330.538	0.0344548	0.398283	3	NDN,ENSCAFG00000010136,ENSCAFG00000010141
554	StP	13	3,691,928	4,022,456	330.529	0.0344548	0.398283	2	ENSCAFG00000000484,ENSCAFG00000026312
555	ShP	18	10,008,786	10,338,686	329.901	0.0348028	0.400858	4	MRPL32,PSMA2,C7orf25,
556	ShP	3	18,116,540	18,446,407	329.868	0.0348028	0.400858	2	FAM172A,ENSCAFG00000028290
557	JRT	20	45,424,907	45,754,334	329.428	0.0350348	0.401866	8	Q2V0Q7_CANFA,XCR1,FYCO1,CXCR6,CCR9,ENSCAFG00000013888,SLC6A20,SACM1L
558	Sci	11	24,891,056	25,220,179	329.124	0.0350348	0.401866	3	ENSCAFG00000000976,C5orf15,VDAC1
559	GSh	19	13,377,903	13,707,017	329.115	0.0351508	0.401866	1	ENSCAFG00000026425
560	GRe	7	80,863,181	81,191,847	328.667	0.0352668	0.401866	4	SLMO1,SPIRE1,CEP76,PSMG2
561	Elk	2	69,919,253	70,247,577	328.325	0.0352668	0.401866	2	PHKB,ENSCAFG00000021449
562	EBD	10	11,231,464	11,559,700	328.237	0.0352668	0.401866	1	ENSCAFG00000022943
563	Rtw	3	33,657,014	33,984,799	327.786	0.0354988	0.402362	5	POLK,COL4A3BP,ENSCAFG00000021416,HMGCR,ENSCAFG00000026019
564	BrS	11	21,775,911	22,103,422	327.512	0.0354988	0.402362	1	CHSY3
565	Bgl	6	5,041,725	5,369,220	327.496	0.0354988	0.402362	2	ENSCAFG00000011106,WBSCR17
566	FSp	3	20,228,640	20,556,036	327.397	0.0357309	0.403564	1	ENSCAFG00000021543
567	BoC	10	9,577,391	9,904,595	327.205	0.0357309	0.403564	2	TMEM5,SRGAP1
568	Gry	1	62,601,620	62,928,460	326.841	0.0360789	0.406777	1	ENSCAFG00000026263
569	LRe	21	6,150,872	6,476,849	325.978	0.0366589	0.411145	1	ENSCAFG00000013779
570	FSp	32	20,203,480	20,529,221	325.742	0.0366589	0.411145	1	PDLIM5
571	Rtw	32	27,506,656	27,832,335	325.68	0.0366589	0.411145	2	XM_847566.1,A2BCY0_CANFA
572	TYo	24	20,615,839	20,941,059	325.221	0.037007	0.4136	6	SIGLEC1,ADAM33,GFRA4,ATRN,ENSCAFG00000006367,C20orf194
573	Wei	23	25,918,473	26,243,359	324.887	0.037007	0.4136	2	SGOL1,KAT2B
574	BoT	25	4,523,552	4,848,097	324.546	0.037123	0.414174	2	ENSCAFG00000005998,ENSCAFG00000025601
575	Rtw	1	102,662,684	102,986,732	324.049	0.037239	0.414745	10	XM_541340.2,A1BG,ZNF8,ZNF274,ENSCAFG00000028331,XM_848460.1,ZSCAN18,ZNF135,ENSCAFG00000008539,ENSCAFG00000023344
576	ESt	25	29,162,149	29,485,983	323.835	0.037355	0.415315	3	BLK,FAM167A,ENSCAFG00000007979
577	EBD	20	20,942,967	21,265,399	322.433	0.037819	0.418692	2	CNTN3,ENSCAFG00000028102
578	Rtw	8	4,809,835	5,132,009	322.175	0.038051	0.418692	5	LGMN,GOLGA5,CHGA,ITPK1,ENSCAFG00000027952
579	CoS	10	11,722,019	12,043,785	321.767	0.038051	0.418692	4	ENSCAFG00000000376,HELB,GRIP1,ENSCAFG00000012238
580	TYo	10	11,722,019	12,043,785	321.767	0.038051	0.418692	4	ENSCAFG00000000376,HELB,GRIP1,ENSCAFG00000012238
581	JRT	10	11,722,019	12,043,785	321.767	0.038051	0.418692	4	ENSCAFG00000000376,HELB,GRIP1,ENSCAFG00000012238
582	IrW	29	19,494,119	19,815,599	321.481	0.038051	0.418692	7	ENSCAFG00000025343,LRRC67,ENSCAFG00000026355,COPS5,CSPP1,ENSCAFG00000028421,ARFGEF1
583	BMD	29	18,464,894	18,785,948	321.055	0.0381671	0.419249	2	PDE7A,DNAJC5B
584	TYo	21	3,603,803	3,924,349	320.547	0.0385151	0.420906	2	ARHGAP42,ENSCAFG00000027529
585	Sci	14	60,190,592	60,511,026	320.435	0.0385151	0.420906
586	BeT	37	22,372,008	22,692,218	320.211	0.0385151	0.420906	1	XM_545629.2
587	Eur	5	81,789,360	82,109,215	319.856	0.0386311	0.421454
588	FSp	20	5,799,187	6,118,464	319.278	0.0395592	0.430845	9	H1FX,C3orf37,COPG,CNBP,ISY1,ENSCAFG00000024835,GP9,ENSCAFG00000004343,KIAA1257
589	GRe	3	64,350,980	64,669,920	318.941	0.0396752	0.431172	3	TNIP2,C4orf8,RNF4
590	NFd	8	57,987,552	58,306,447	318.896	0.0397912	0.431172
591	Sci	17	21,832,990	22,151,713	318.724	0.0397912	0.431172	4	NCOA1,C2orf79,CENPO,ADCY3
592	Elk	27	47,918,280	48,236,582	318.303	0.0401392	0.432019	5	CECR1,ENSCAFG00000021131,ENSCAFG00000016131,CECR2,SLC25A18
593	NSD	25	41,716,639	42,034,701	318.063	0.0401392	0.432019	2	KIAA1486,ENSCAFG00000010373
594	Dob	32	7,490,779	7,808,816	318.038	0.0401392	0.432019	2	FGF5_CANFA,XM_544947.2
595	GoS	32	7,863,969	8,181,992	318.024	0.0401392	0.432019	2	ENSCAFG00000024794,BMP3
596	Gry	28	3,715,875	4,033,493	317.619	0.0406032	0.433772	3	WDFY4,LRRC18,C10orf72
597	LRe	3	56,423,596	56,741,149	317.554	0.0407193	0.433772	5	CRTC3,IQGAP1,ENSCAFG00000022698,ZNF774,ZSCAN2
598	ESt	3	43,499,533	43,816,982	317.45	0.0409513	0.433772	1	ADAMTS17
599	Eur	9	25,040,286	25,357,630	317.345	0.0409513	0.433772	13	KRT40,KRT39,KRT23,KRT20,A3RF35_CANFA,K1C10_CANFA,KRT28,KRT27,KRT26,KRT25,KRT24,KRT222,LOC612467
600	GSh	22	19,947,690	20,265,004	317.315	0.0409513	0.433772	1	PCDH20
601	GRe	23	30,309,058	30,626,241	317.184	0.0409513	0.433772	7	SH3BP5,ENSCAFG00000027977,CAPN7,ENSCAFG00000024259,XM_848149.1,ENSCAFG00000024369,ENSCAFG00000021922
602	ShP	22	9,704,596	10,021,614	317.019	0.0409513	0.433772	2	C13orf31,CCDC122
603	BoT	33	33,826,588	34,143,488	316.901	0.0411833	0.433772	3	C3orf21,FAM43A,LSG1
604	BrS	4	65,826,413	66,143,187	316.775	0.0411833	0.433772	1	ENSCAFG00000027319
605	Dob	28	17,360,571	17,677,289	316.719	0.0411833	0.433772	12	FGF8_CANFA,NPM3,MGEA5,ENSCAFG00000020830,Q7JGZ5_CANFA,ENSCAFG00000028383,ENSCAFG00000021209,C10orf76,RPL37A,HPS6,LDB1,PPRC1
606	Dac	18	4,980,153	5,296,804	316.652	0.0411833	0.433772	1	COBL
607	Dac	1	65,014,928	65,331,536	316.609	0.0412993	0.433772	4	PKIB,FABP7,SMPDL3A,RLBP1L2
608	BMD	1	74,791,951	75,108,441	316.491	0.0412993	0.433772	2	ENSCAFG00000001291,ENSCAFG00000023549
609	JRT	11	36,353,483	36,669,815	316.333	0.0416473	0.433772	2	Q95J87_CANFA,C9orf150
610	Gry	34	8,785,004	9,101,109	316.106	0.0418794	0.433772	1	MTRR
611	ESt	13	3,036,181	3,352,265	316.085	0.0418794	0.433772	6	LAPTM4B,MATN2,XM_843126.1,ENSCAFG00000025847,C8orf47,HRSP12
612	Gry	13	3,036,181	3,352,265	316.085	0.0418794	0.433772	6	LAPTM4B,MATN2,XM_843126.1,ENSCAFG00000025847,C8orf47,HRSP12
613	GRe	16	23,581,652	23,897,692	316.041	0.0418794	0.433772	4	NCAPG2,ESYT2,WDR60,VIPR2
614	Eur	17	52,331,861	52,647,727	315.867	0.0419954	0.433772	6	DUSP11,TPRKB,NAT8,ENSCAFG00000024025,XM_533005.2,ENSCAFG00000008835
615	BoT	15	44,744,803	45,060,496	315.694	0.0419954	0.433772
616	JRT	30	5,034,878	5,350,564	315.687	0.0419954	0.433772	4	ENSCAFG00000008199,GREM1,SCG5,ENSCAFG00000008236
617	Dac	24	25,626,524	25,942,049	315.526	0.0419954	0.433772	9	SNTA1,CBFA2T2,NECAB3,C20orf134,E2F1,PXMP4,ENSCAFG00000026300,ENSCAFG00000007447,ZNF341
618	Elk	24	25,626,524	25,942,049	315.526	0.0419954	0.433772	9	SNTA1,CBFA2T2,NECAB3,C20orf134,E2F1,PXMP4,ENSCAFG00000026300,ENSCAFG00000007447,ZNF341
619	GSh	19	30,443,203	30,758,486	315.284	0.0419954	0.433772	1	ENSCAFG00000027985
620	Rtw	19	12,841,995	13,157,220	315.226	0.0419954	0.433772	2	XM_533290.2,ENSCAFG00000021550
621	Wei	1	23,142,170	23,457,346	315.177	0.0424594	0.435652	1	ITF2_CANFA
622	EBD	1	44,046,828	44,361,429	314.602	0.0428074	0.435652	2	PLEKHG1,MTHFD1L
623	ShP	4	5,856,312	6,170,824	314.513	0.0428074	0.435652	2	ENSCAFG00000025810,ENSCAFG00000010041
624	GRe	32	34,916,822	35,231,179	314.358	0.0430394	0.435652	5	C4orf32,AP1AR,TIFA,XP_853318.1,ALPK1
625	LRe	32	34,916,822	35,231,179	314.358	0.0430394	0.435652	5	C4orf32,AP1AR,TIFA,XP_853318.1,ALPK1
626	TYo	3	43,576,160	43,890,044	313.885	0.0432715	0.435652	3	ADAMTS17,LYSMD4,MEF2A
627	NSD	5	65,662,615	65,976,465	313.851	0.0432715	0.435652	6	SPSB1,SLC25A33,TMEM201,PIK3CD,CLSTN1,ENSCAFG00000027480
628	Rtw	26	3,865,434	4,179,262	313.829	0.0432715	0.435652	9	ENSCAFG00000024929,ENSCAFG00000026131,ENSCAFG00000006377,PUS1,ULK1,MMP17,SFRS8,ENSCAFG00000023400,ENSCAFG00000028292
629	BMD	3	53,626,857	53,940,622	313.766	0.0432715	0.435652	1	ENSCAFG00000022471
630	BrS	1	26,140,346	26,454,083	313.738	0.0432715	0.435652
631	GSh	19	42,745,087	43,058,556	313.47	0.0432715	0.435652	1	ENSCAFG00000023532
632	GRe	23	31,406,335	31,719,762	313.428	0.0432715	0.435652	6	NEK11,ENSCAFG00000028297,ENSCAFG00000024179,NUDT16,MRPL3,CPNE4
633	StP	12	7,384,390	7,697,625	313.236	0.0433875	0.435652	9	SCUBE3,ZNF76,DEF6,PPARD_CANFA,FANCE,ENSCAFG00000001318,TEAD3,TULP1,XM_859221.1
634	GRe	3	57,449,719	57,762,949	313.231	0.0433875	0.435652	10	FSD2,ENSCAFG00000026994,ENSCAFG00000013145,WHAMM,HOMER2,FAM103A1,C15orf40,BTBD1,ENSCAFG00000021549,TM6SF1
635	BeT	3	56,623,830	56,936,966	313.137	0.0433875	0.435652	9	IQGAP1,ZNF774,ZSCAN2,ENSCAFG00000023242,WDR73,NMB,SC11A_CANFA,ZNF592,ALPK3
636	Elk	7	75,983,699	76,296,463	312.765	0.0433875	0.435652	1	ARHGAP28
637	StP	9	31,625,422	31,938,072	312.651	0.0433875	0.435652	2	ENSCAFG00000021299,ENSCAFG00000017330
638	ShP	4	4,245,723	4,558,255	312.533	0.0435035	0.435652	1	ENSCAFG00000023795
639	BeT	X	97,003,376	97,315,678	312.303	0.0438515	0.435652
640	Sci	22	5,586,879	5,899,026	312.148	0.0438515	0.435652	1	CYSLTR2
641	BeT	22	5,586,879	5,899,026	312.148	0.0438515	0.435652	1	CYSLTR2
642	StP	27	47,245,703	47,557,800	312.098	0.0439675	0.435652	3	ENSCAFG00000016073,ENSCAFG00000024562,A0ZSX7_CANFA
643	GoS	15	10,216,382	10,528,279	311.898	0.0440835	0.435652
644	LRe	11	70,495,965	70,807,803	311.839	0.0440835	0.435652	13	ENSCAFG00000023218,SLC31A2,FKBP15,SLC31A1,CDC26,PRPF4,RNF183,WDR31,BSPRY,HDHD3,ALAD,POLE3,C9orf43
645	Gry	5	76,687,692	76,999,500	311.809	0.0440835	0.435652	2	ADAMTS18,MON1B
646	BMD	6	9,633,039	9,944,620	311.582	0.0443155	0.435652	10	MLXIPL,TBL2,BCL7B,BAZ1B,FZD9,FKBP6,ENSCAFG00000013047,ENSCAFG00000013197,ENSCAFG00000013253,ENSCAFG00000013328
647	GRe	6	9,633,039	9,944,620	311.582	0.0443155	0.435652	10	MLXIPL,TBL2,BCL7B,BAZ1B,FZD9,FKBP6,ENSCAFG00000013047,ENSCAFG00000013197,ENSCAFG00000013253,ENSCAFG00000013328
648	FSp	10	46,386,701	46,698,137	311.437	0.0443155	0.435652	10	EIF5B,TXNDC9,LYG1,LYG2,XM_534877.2,ENSCAFG00000023870,MITD1,LIPT1,ENSCAFG00000002299,TSGA10
649	ShP	5	8,049,849	8,360,922	311.074	0.0445476	0.435652	2	BARX2,ENSCAFG00000024091
650	Elk	10	7,261,865	7,572,784	310.92	0.0446636	0.435652
651	GSh	9	5,984,381	6,295,173	310.793	0.0446636	0.435652	3	TMC8,TMC6,ENSCAFG00000005224
652	Elk	9	47,290,004	47,600,720	310.717	0.0446636	0.435652	6	EFCAB5,XM_863053.1,CCDC55,cfa-mir-423a,Q33E87_CANFA,BLMH
653	Elk	13	45,913,705	46,224,398	310.694	0.0446636	0.435652	3	ENSCAFG00000024104,ENSCAFG00000023952,GABRB1
654	GSh	17	4,713,257	5,023,907	310.651	0.0447796	0.435652	2	TSSC1,TTC15
655	GSl	37	17,701,060	18,011,651	310.592	0.0447796	0.435652	8	NDUFS1,EEF1B2,ENSCAFG00000026348,ENSCAFG00000021390,GPR1,ENSCAFG00000013372,ZDBF2,ADAM23
656	BeT	13	9,065,696	9,376,051	310.356	0.0447796	0.435652
657	Wei	2	36,274,175	36,584,493	310.319	0.0448956	0.435652
658	GoS	26	22,819,047	23,129,310	310.264	0.0448956	0.435652	1	SEZ6L
659	LRe	13	54,698,853	55,009,004	310.152	0.0448956	0.435652	1	ENSCAFG00000025979
660	Gry	16	13,830,755	14,140,672	309.918	0.0450116	0.435652	1	DGKI
661	Dob	11	42,807,434	43,116,707	309.274	0.0457077	0.435652	1	MLLT3
662	Dob	28	4,513,816	4,823,045	309.23	0.0457077	0.435652	8	CHAT,DNAJC19,C10orf53,OGDHL,PARG,ENSCAFG00000006781,ENSCAFG00000025957,NCOA4
663	GoS	8	48,363,780	48,672,882	309.103	0.0458237	0.435652
664	GSh	6	4,822,328	5,131,197	308.87	0.0459397	0.435652	1	ENSCAFG00000011106
665	StP	X	87,533,744	87,842,569	308.826	0.0459397	0.435652	6	DCX,XM_848100.1,ENSCAFG00000018185,ENSCAFG00000018186,XM_538142.2,XM_538143.2
666	Gry	10	13,084,794	13,393,452	308.659	0.0459397	0.435652	1	IFNG_CANFA
667	BeT	1	22,990,740	23,299,258	308.519	0.0459397	0.435652	3	ENSCAFG00000023896,ENSCAFG00000023127,ITF2_CANFA
668	ShP	9	14,753,177	15,061,419	308.243	0.0461717	0.435652	15	MAP3K3,LIMD2,STRADA,CCDC47,DDX42,FTSJ3,PSMC5,XM_856284.1,LOC480476,SOMA_CANFA,CD79B,SCN4A,C17orf72,ICAM2,ERN1
669	ShP	18	47,691,990	48,000,073	308.084	0.0462877	0.435652	3	CD82,ENSCAFG00000021434,ALX4
670	Gry	11	18,727,147	19,034,571	307.425	0.0466357	0.435652	6	GRAMD3,ENSCAFG00000021521,ALDH7A1,PHAX,C5orf48,LMNB1
671	StP	37	7,656,942	7,964,331	307.39	0.0466357	0.435652
672	CoS	8	47,604,360	47,911,638	307.279	0.0466357	0.435652	1	PCNX
673	Sci	24	34,988,236	35,295,309	307.074	0.0467517	0.435652	7	PKIG,Q9XT63_CANFA,WISP2,ENSCAFG00000027037,KCNK15,RIMS4,YWHAB
674	Rtw	12	54,447,416	54,754,464	307.049	0.0467517	0.435652
675	NFd	19	27,874,643	28,181,453	306.811	0.0468677	0.435652
676	GSh	22	9,810,228	10,117,018	306.791	0.0468677	0.435652	2	C13orf31,CCDC122
677	GRe	8	49,590,777	49,897,320	306.544	0.0468677	0.435652	7	PSN1_CANFA,ENSCAFG00000016823,NUMB,SDHD,HEATR4,ENSCAFG00000016842,ENSCAFG00000016848
678	BeT	19	13,656,613	13,963,134	306.522	0.0468677	0.435652
679	GSl	4	69,216,261	69,522,556	306.296	0.0469838	0.435652	1	ENSCAFG00000028237
680	BoC	19	22,055,323	22,361,563	306.241	0.0469838	0.435652	5	C4orf31,ENSCAFG00000004167,PRDM5,ENSCAFG00000027239,ENSCAFG00000004183
681	ShP	22	8,914,915	9,221,104	306.19	0.0470998	0.435652	2	KIAA1704,NUFIP1
682	Dob	28	11,123,803	11,429,815	306.013	0.0472158	0.435652	1	PLCE1
683	BrS	2	72,695,040	73,001,026	305.987	0.0472158	0.435652	8	NKAIN1,PUM1,ENSCAFG00000028101,ENSCAFG00000026110,ENSCAFG00000026435,XM_847156.1,ENSCAFG00000026357,SDC3
684	GoS	15	31,872,942	32,178,819	305.878	0.0472158	0.435652	1	C12orf50
685	BrS	1	55,951,882	56,257,560	305.679	0.0472158	0.435652	1	ENSCAFG00000000776
686	ShP	13	23,845,380	24,150,791	305.412	0.0472158	0.435652	2	ENSCAFG00000022374,ENSCAFG00000026042
687	NSD	6	9,573,756	9,878,905	305.15	0.0473318	0.435652	12	STX1A,WBSCR22,ENSCAFG00000027665,DNAJC30,VPS37D,MLXIPL,TBL2,BCL7B,BAZ1B,FZD9,FKBP6,ENSCAFG00000013047
688	EBD	26	13,094,357	13,399,234	304.878	0.0475638	0.435652	2	ENSCAFG00000027049,RPH3A
689	Rtw	16	6,729,495	7,034,316	304.822	0.0475638	0.435652
690	Rtw	16	3,315,668	3,620,347	304.68	0.0475638	0.435652	1	TNS3
691	Dob	9	23,094,892	23,399,439	304.548	0.0477958	0.435652	18	ARL4D,ENSCAFG00000021609,ENSCAFG00000022014,ENSCAFG00000022981,ENSCAFG00000022977,ENSCAFG00000022914,ENSCAFG00000022928,ENSCAFG00000020861,ENSCAFG00000021155,TMEM106A,NBR1,BRCA1_CANFA,RND2,VAT1,IFI35,RL27_CANFA,RUNDC1,AARSD1
692	Bgl	14	38,214,248	38,518,755	304.508	0.0477958	0.435652	2	SP4,DNAH11
693	Wei	14	17,028,292	17,332,653	304.362	0.0477958	0.435652	3	ADAM22,SRI,STEAP4
694	BoC	5	44,880,153	45,184,489	304.337	0.0477958	0.435652	9	PEMT,ENSCAFG00000026606,ENSCAFG00000018534,RASD1,MED9,NT5M,ENSCAFG00000001949,COPS3,B1NLQ8_CANFA
695	Wei	2	58,037,220	58,341,197	303.978	0.0480278	0.435652	5	MAP1B,MRPS27,PTCD2,ENSCAFG00000026095,ZNF366
696	GoS	8	34,327,932	34,631,663	303.732	0.0480278	0.435652	3	ENSCAFG00000015062,KTN1,XP_853729.1
697	BMD	1	61,695,688	61,999,379	303.692	0.0480278	0.435652	4	MCM9,ASF1A,ENSCAFG00000027622,FAM184A
698	BoC	24	14,815,061	15,118,647	303.587	0.0480278	0.435652	3	MKKS,ENSCAFG00000026381,SNAP25
699	JRT	3	32,006,992	32,310,426	303.435	0.0480278	0.435652	2	WDR41,PDE8B
700	IrW	10	44,814,574	45,117,963	303.39	0.0480278	0.435652	3	TBC1D8,LOC612949,NPAS2
701	Dac	22	45,592,963	45,896,190	303.228	0.0480278	0.435652	2	GPC5,ENSCAFG00000024357
702	CoS	4	56,355,373	56,658,534	303.162	0.0480278	0.435652	1	SGCD
703	ESt	25	28,671,347	28,974,413	303.067	0.0480278	0.435652	5	Q30KS3_CANFA,Q30KS1_CANFA,Q30KS0_CANFA,ENSCAFG00000026411,Q30KR9_CANFA
704	BrS	2	51,566,484	51,869,220	302.737	0.0480278	0.435652	5	KIF2A,DIMT1L,ENSCAFG00000028349,IPO11,LRRC70
705	Dac	8	47,566,810	47,869,517	302.708	0.0480278	0.435652	1	PCNX
706	GSh	21	33,255,619	33,558,305	302.687	0.0480278	0.435652	16	ENSCAFG00000025001,XM_542459.2,XM_848668.1,ENSCAFG00000006609,Q6W6V4_CANFA,XM_848692.1,XM_542462.1,XM_848709.1,ENSCAFG00000006620,XM_542465.2,ENSCAFG00000006650,Q70ZC0_CANFA,ENSCAFG00000024381,Q70ZJ4_CANFA,Q70Z62_CANFA,ENSCAFG00000023736
707	StP	5	64,810,545	65,112,634	302.09	0.0481439	0.436087	2	SLC45A1,ENSCAFG00000019688
708	EBD	26	12,136,337	12,438,210	301.874	0.0484919	0.437383	8	ATXN2,BRAP,ACAD10,XM_848521.1,LOC611711,ENSCAFG00000026405,MAPKAPK5,ENSCAFG00000026327
709	TYo	12	6,878,599	7,180,340	301.742	0.0484919	0.437383	8	C6orf106,ENSCAFG00000026903,ENSCAFG00000001230,ENSCAFG00000001231,UHRF1BP1,XM_846297.1,TAF11,ANKS1A
710	CoS	4	63,009,382	63,311,117	301.736	0.0484919	0.437383	3	ENSCAFG00000027689,SH3TC2,ADRB2_CANFA
711	IrW	9	9,227,203	9,528,527	301.325	0.0489559	0.439141
712	LRe	21	7,225,351	7,526,427	301.077	0.0489559	0.439141	1	XM_543064.2
713	BoT	28	26,587,067	26,887,718	300.652	0.0490719	0.439141
714	TYo	3	56,504,090	56,804,659	300.57	0.0490719	0.439141	8	IQGAP1,ENSCAFG00000022698,ZNF774,ZSCAN2,ENSCAFG00000023242,WDR73,NMB,SC11A_CANFA
715	EBD	5	45,922,522	46,222,474	299.953	0.0491879	0.439141	4	XM_545523.2,XM_536672.2,SERBP1,NP_001020570.1
716	LRe	1	18,905,367	19,205,309	299.943	0.0491879	0.439141	2	XM_541080.1,Q4JIV8_CANFA
717	BeT	10	22,217,941	22,517,579	299.639	0.0493039	0.439141	1	TBC1D22A
718	Sci	9	24,142,916	24,442,502	299.587	0.0493039	0.439141	15	ZNF385C,NKIRAS2,DNAJC7,CNP,TTC25,ACLY,KLHL11,KLHL10,NT5C3L,FKBP10,XM_844515.1,Q6VAH9_CANFA,HAP1,GAST_CANFA,Q9XST3_CANFA
719	GoS	20	60,088,188	60,387,603	299.416	0.0493039	0.439141	11	MOBKL2A,MKNK2,ENSCAFG00000019432,CSNK1G2,SCAMP4,ADAT3,XM_863489.1,REXO1,ATP8B3,ONECUT3,ENSCAFG00000024154
720	GSl	24	3,049,146	3,348,537	299.392	0.04942	0.439563	7	XM_843201.1,CST8,ENSCAFG00000005120,CST11,NAPB,GZF1,NXT1
721	Eur	11	5,166,275	5,465,032	298.758	0.049652	0.440213	2	ENSCAFG00000028158,ADAMTS2
722	BoT	25	31,238,345	31,536,956	298.612	0.049768	0.440213	3	KIF13B,HMBOX1,ENSCAFG00000027998
723	Sci	1	96,924,282	97,222,846	298.565	0.049768	0.440213	2	ERMP1,C9orf79
724	GoS	1	96,924,282	97,222,846	298.565	0.049768	0.440213	2	ERMP1,C9orf79
725	BMD	1	45,993,565	46,291,857	298.293	0.05	0.440856	5	VIP_CANFA,ENSCAFG00000000540,FBXO5,MTRF1L,RGS17
726	GSl	17	3,026,987	3,325,164	298.178	0.05	0.440856	3	ENSCAFG00000027828,FAM110C,SH3YL1
727	NFd	15	61,661,482	61,959,571	298.09	0.050116	0.440856	2	ENSCAFG00000002517,ENSCAFG00000022880
728	Eur	7	4,051,439	4,349,453	298.015	0.050116	0.440856	4	ENSCAFG00000010633,IPO9,ENSCAFG00000010671,NAV1
729	JRT	32	8,238,710	8,535,993	297.284	0.0509281	0.444078	2	PRKG2,RASGEF1B
730	ESt	21	46,775,001	47,072,196	297.196	0.0510441	0.444078	1	ENSCAFG00000026076
731	Dob	3	65,946,368	66,243,437	297.07	0.0511601	0.444078	1	ENSCAFG00000015120
732	FSp	3	49,070,024	49,367,005	296.982	0.0513921	0.444078
733	CoS	5	81,427,721	81,724,690	296.97	0.0513921	0.444078	1	ATBF1
734	EBD	13	18,864,071	19,161,015	296.945	0.0513921	0.444078	1	EIF3H
735	StP	21	23,948,686	24,245,577	296.892	0.0513921	0.444078	5	C11orf67,ENSCAFG00000011455,RSF1,ICLN_CANFA,AQP11
736	Sci	17	23,832,299	24,128,567	296.269	0.0517401	0.444078	12	DPYSL5,ENSCAFG00000000796,MAPRE3,TMEM214,AGBL5,ENSCAFG00000004661,EMILIN1,KHK,CGREF1,ABHD1,PREB,TCF23
737	TYo	34	8,237,822	8,533,833	296.012	0.0519722	0.444078
738	CoS	8	40,347,138	40,643,092	295.955	0.0519722	0.444078
739	GRe	25	32,113,735	32,409,528	295.794	0.0519722	0.444078	3	ZNF395,Q9BF00_CANFA,ELP3
740	BoT	X	26,349,043	26,644,787	295.745	0.0519722	0.444078	1	Q6Q275_CANFA
741	Bgl	4	74,175,220	74,470,963	295.744	0.0519722	0.444078	3	GDNF,WDR70,ENSCAFG00000018679
742	GRe	15	29,561,414	29,857,096	295.683	0.0520882	0.444078	3	LRRIQ1,ENSCAFG00000027270,ALX1
743	JRT	1	18,957,761	19,253,280	295.52	0.0520882	0.444078	3	XM_541080.1,Q4JIV8_CANFA,ENSCAFG00000028239
744	Dac	10	9,506,695	9,802,000	295.306	0.0522042	0.444078	4	ENSCAFG00000028219,C16orf61,TMEM5,SRGAP1
745	Dob	2	63,501,236	63,796,449	295.214	0.0523202	0.444078	2	IRX6,ENSCAFG00000026661
746	NSD	4	3,651,031	3,946,165	295.135	0.0523202	0.444078	1	ENSCAFG00000009969
747	ShP	10	46,434,749	46,729,702	294.954	0.0525522	0.444078	10	EIF5B,TXNDC9,LYG1,LYG2,XM_534877.2,ENSCAFG00000023870,MITD1,LIPT1,ENSCAFG00000002299,TSGA10
748	Elk	3	64,723,341	65,018,201	294.861	0.0525522	0.444078	10	ZFYVE28,MXD4,HAUS3,ENSCAFG00000021284,POLN,NAT8L,C4orf48,WHSC2,WHSC1,ENSCAFG00000028375
749	BrS	7	51,870,737	52,165,573	294.837	0.0525522	0.444078
750	Wei	29	27,118,626	27,413,448	294.823	0.0525522	0.444078	1	ENSCAFG00000008303
751	BMD	18	18,094,409	18,388,836	294.428	0.0529002	0.444078	3	SRPK2,ENSCAFG00000026537,MLL5
752	ShP	18	18,094,409	18,388,836	294.428	0.0529002	0.444078	3	SRPK2,ENSCAFG00000026537,MLL5
753	GSl	3	18,116,540	18,410,324	293.785	0.0531323	0.444078	1	FAM172A
754	JRT	X	27,577,298	27,870,783	293.486	0.0533643	0.444078	1	ENSCAFG00000013767
755	NFd	17	51,731,405	52,024,793	293.389	0.0533643	0.444078	14	CCDC142,MRPL53,MOGS,WBP1,INO80B,RTKN,WDR54,C2orf81,ENSCAFG00000008572,DCTN1,SLC4A5,MTHFD2,MOBKL1B,XM_850028.1
756	BeT	4	9,301,308	9,594,566	293.259	0.0534803	0.444078	2	ENSCAFG00000011566,PCNXL2
757	Bgl	24	25,997,395	26,290,526	293.132	0.0534803	0.444078	6	CHMP4B,ENSCAFG00000007483,ENSCAFG00000007487,RALY,ENSCAFG00000021644,EIF2S2
758	Dac	9	7,139,903	7,432,781	292.879	0.0535963	0.444078	12	ST6GALNAC2,ENSCAFG00000021491,ENSCAFG00000021275,Q00M97_CANFA,RHDF2_CANFA,Q00M96_CANFA,UBE2O,SPHK1,PRPSAP1,ENSCAFG00000028119,QRICH2,FAM100B
759	Gry	18	23,558,274	23,851,118	292.845	0.0535963	0.444078	1	SEMA3C
760	TYo	2	30,401,844	30,694,632	292.789	0.0537123	0.444078
761	FSp	3	44,622,942	44,915,687	292.746	0.0537123	0.444078	1	Q6QHH2_CANFA
762	GRe	31	4,169,466	4,462,167	292.702	0.0537123	0.444078	1	ENSCAFG00000007800
763	Dob	4	65,826,413	66,119,035	292.623	0.0537123	0.444078	1	ENSCAFG00000027319
764	BeT	15	32,166,592	32,459,209	292.618	0.0537123	0.444078	5	C12orf50,C12orf29,CEP290,XM_536486.2,TMTC3
765	NFd	1	96,769,118	97,061,478	292.361	0.0538283	0.444078	4	ENSCAFG00000025949,KIAA1432,ENSCAFG00000028315,ERMP1
766	LRe	2	75,137,956	75,430,137	292.182	0.0538283	0.444078	8	ENSCAFG00000011895,ENSCAFG00000011904,EYA3,SMPDL3B,RPA2,C1orf38,PPP1R8,ENSCAFG00000027605
767	EBD	13	26,828,478	27,120,636	292.159	0.0538283	0.444078	1	ENSCAFG00000021217
768	Eur	1	59,967,124	60,259,048	291.925	0.0538283	0.444078	10	BET3L,FAM26E,FAM26D,RWDD1,XM_850267.1,RSHL1,ZUFSP,KPNA5,FAM162B,GPRC6A
769	Sci	15	22,044,319	22,336,225	291.907	0.0538283	0.444078	3	PHLDA1,NAP1L1,ENSCAFG00000027041
770	GSl	18	15,905,998	16,197,551	291.554	0.0540603	0.444078	6	ENSCAFG00000025520,SLC26A4,BCAP29,DUS4L,XM_852286.1,COG5
771	Wei	5	76,916,364	77,207,882	291.519	0.0540603	0.444078	2	MON1B,ENSCAFG00000022574
772	FSp	3	3,983,276	4,274,768	291.493	0.0540603	0.444078	2	STARD4,CAMK4
773	EBD	15	47,991,594	48,283,030	291.437	0.0540603	0.444078	2	POU4F2,TTC29
774	BMD	28	19,240,834	19,532,071	291.238	0.0541763	0.444078	5	ENSCAFG00000010495,SLK,COL17A1,C10orf78,C10orf79
775	Wei	X	27,975,940	28,267,094	291.155	0.0542923	0.444078
776	BoC	5	19,286,890	19,578,019	291.13	0.0542923	0.444078	8	CEP164,Q56JJ3_CANFA,RNF214,PCSK7,TAGLN,SIDT2,PAFAH1B2,ENSCAFG00000022359
777	BeT	16	38,079,477	38,370,573	291.097	0.0542923	0.444078	1	PPP1R3B
778	TYo	16	6,778,624	7,069,442	290.819	0.0544084	0.444078	1	ENSCAFG00000022418
779	StP	27	33,189,551	33,480,340	290.79	0.0544084	0.444078	3	LMO3,MGST1,SLC15A5
780	BMD	4	31,152,598	31,443,325	290.728	0.0544084	0.444078	1	ENSCAFG00000026048
781	Elk	11	33,371,657	33,662,370	290.714	0.0544084	0.444078
782	StP	10	29,211,789	29,502,228	290.44	0.0544084	0.444078	7	ENSCAFG00000001385,ENSCAFG00000001388,DMC1,DDX17,KDELR3,KCNJ4,CSNK1E
783	GSh	19	19,716,202	20,006,633	290.432	0.0544084	0.444078	4	XM_846236.1,ENSCAFG00000003975,ENSCAFG00000028203,SPRY1
784	Eur	15	58,716,931	59,007,194	290.264	0.0546404	0.444078	5	RXFP1,PPID,ETFDH,FNIP2,C4orf45
785	BMD	7	59,906,129	60,196,244	290.116	0.0548724	0.444078	3	ENSCAFG00000018002,ENSCAFG00000024729,ENSCAFG00000026648
786	StP	5	18,894,656	19,184,700	290.045	0.0548724	0.444078	2	ENSCAFG00000027627,DSCAML1
787	Eur	25	21,020,826	21,310,838	290.013	0.0548724	0.444078	3	ZMYM2,ZMYM5,PSPC1
788	Gry	13	21,445,990	21,735,982	289.993	0.0548724	0.444078	3	MAL2,NOV,ENPP2
789	GoS	6	10,650,101	10,940,087	289.987	0.0548724	0.444078	11	UPK3B,UPK3BL,ENSCAFG00000013668,POLR2J2,LRWD1,ALKBH4,ORAI2,PRKRIP1,SH2B2,CUX1,ENSCAFG00000023187
790	GRe	3	46,458,625	46,748,610	289.986	0.0548724	0.444078
791	GRe	28	6,063,443	6,353,309	289.867	0.0549884	0.444078
792	LRe	1	23,266,219	23,555,914	289.696	0.0549884	0.444078	1	ITF2_CANFA
793	EBD	16	27,450,195	27,739,723	289.529	0.0551044	0.444078	2	ZMAT4,ENSCAFG00000025254
794	BeT	10	10,859,628	11,148,822	289.195	0.0553364	0.444078	2	MSRB3,ENSCAFG00000027222
795	Dac	22	13,867,955	14,157,129	289.175	0.0553364	0.444078
796	GoS	3	83,745,309	84,034,450	289.142	0.0553364	0.444078	2	ENSCAFG00000026467,ENSCAFG00000027704
797	BoC	22	19,906,687	20,195,756	289.07	0.0553364	0.444078	1	PCDH20
798	Dac	21	28,927,356	29,216,409	289.054	0.0553364	0.444078	12	FOLR1,C11orf51,LRTOMT,C11orf59,LRRC51,NUMA1,Q3HTU6_CANFA,RNF121,ENSCAFG00000025764,XM_534024.2,ART5,ART1
799	Dob	36	11,262,682	11,551,590	288.909	0.0554524	0.444452	1	ENSCAFG00000010520
800	GSh	19	20,372,483	20,661,174	288.692	0.0556845	0.445754	7	ENSCAFG00000003988,NUDT6,O77767_CANFA,BBS12,XM_540962.2,ENSCAFG00000021039,IL21_CANFA
801	Dob	5	7,263,243	7,551,712	288.47	0.0560325	0.447411	2	ADAMTS15,ADAMTS8
802	Rtw	12	17,240,747	17,528,970	288.224	0.0563805	0.447411	4	ENSCAFG00000026242,ENPP4,ENPP5,ENSCAFG00000002023
803	FSp	35	12,513,507	12,801,638	288.132	0.0563805	0.447411	2	OFCC1,ENSCAFG00000009645
804	BMD	1	76,821,524	77,109,575	288.052	0.0563805	0.447411	2	ENSCAFG00000001352,AGTPBP1
805	BrS	1	76,821,524	77,109,575	288.052	0.0563805	0.447411	2	ENSCAFG00000001352,AGTPBP1
806	Dob	13	13,168,740	13,456,639	287.9	0.0563805	0.447411	2	SYBU,ENSCAFG00000027907
807	IrW	9	5,944,905	6,232,762	287.858	0.0563805	0.447411	7	AFMID,TK1,XM_846212.1,C17orf99,TMC8,TMC6,ENSCAFG00000005224
808	Eur	3	31,677,319	31,965,120	287.802	0.0564965	0.447764	3	ENSCAFG00000025823,TBCA,OTP
809	IrW	17	7,061,039	7,348,734	287.696	0.0567285	0.447764
810	ESt	22	12,145,188	12,432,653	287.466	0.0567285	0.447764	6	NARG1L,MTRF1,ENSCAFG00000004800,XM_542586.2,ENSCAFG00000021641,KBTBD6
811	NFd	17	21,864,380	22,151,713	287.334	0.0568445	0.447764	4	NCOA1,C2orf79,CENPO,ADCY3
812	GSl	14	17,688,785	17,976,060	287.276	0.0568445	0.447764	1	C7orf62
813	Eur	9	15,598,507	15,885,731	287.225	0.0568445	0.447764	4	SMURF2,LOC480469,C17orf58,ENSCAFG00000011552
814	GSl	9	31,948,751	32,235,900	287.15	0.0570766	0.44885
815	Bgl	14	40,314,372	40,601,429	287.058	0.0571926	0.44885	1	STK31
816	BrS	8	47,762,152	48,049,198	287.047	0.0571926	0.44885
817	NFd	15	32,049,363	32,336,353	286.991	0.0573086	0.44921	5	C12orf50,C12orf29,CEP290,XM_536486.2,TMTC3
818	TYo	15	51,515,505	51,802,299	286.795	0.0576566	0.450468	2	XM_848430.1,MAB21L2
819	Dob	29	19,815,599	20,102,334	286.736	0.0576566	0.450468	2	ARFGEF1,CPA6
820	ESt	1	41,265,588	41,552,148	286.561	0.0577726	0.450468	3	STXBP5,ENSCAFG00000000362,ENSCAFG00000026536
821	Rtw	11	64,776,544	65,062,705	286.162	0.0583527	0.450468
822	EBD	20	3,241,457	3,527,488	286.032	0.0583527	0.450468	5	SLC41A3,ALDH1L1,ENSCAFG00000026516,ENSCAFG00000013572,KLF15
823	LRe	1	11,564,310	11,850,281	285.972	0.0584687	0.450468	1	DOK6
824	CoS	23	25,957,446	26,243,359	285.914	0.0584687	0.450468	2	SGOL1,KAT2B
825	BoC	22	11,895,473	12,181,191	285.719	0.0585847	0.450468	1	XM_843541.1
826	LRe	13	40,219,471	40,505,186	285.716	0.0585847	0.450468	13	ZC3H3,GSDMD,EEF1D,TIGD5,PYCRL,TSTA3,ENSCAFG00000023744,MAPK15,FAM83H,SCRIB,PUF60,NRBP2,PLEC
827	GoS	6	9,379,907	9,665,608	285.702	0.0585847	0.450468	12	WBSCR28,WBSCR27,CLDN4,CLD3_CANFA,ENSCAFG00000012539,STX1A,WBSCR22,ENSCAFG00000027665,DNAJC30,VPS37D,MLXIPL,TBL2
828	BoC	29	25,851,844	26,137,527	285.684	0.0585847	0.450468
829	Wei	15	44,864,368	45,150,033	285.666	0.0585847	0.450468	1	ENSCAFG00000026891
830	Elk	1	26,725,286	27,010,905	285.62	0.0585847	0.450468	3	MEX3C,Q6JDJ5_CANFA,ELAC1
831	GRe	8	4,836,630	5,122,167	285.538	0.0585847	0.450468	5	LGMN,GOLGA5,CHGA,ITPK1,ENSCAFG00000027952
832	JRT	35	9,217,625	9,503,140	285.516	0.0585847	0.450468	2	F13A1,ENSCAFG00000020961
833	BrS	28	13,165,702	13,451,168	285.467	0.0587007	0.450468	4	LCOR,ENSCAFG00000008908,ENSCAFG00000020736,Q59I58_CANFA
834	TYo	24	32,253,545	32,538,806	285.262	0.0590487	0.450468	3	LPIN3,EMILIN3,CHD6
835	BMD	6	37,424,610	37,709,748	285.139	0.0592807	0.450468	1	ENSCAFG00000019082
836	Wei	25	25,671,972	25,956,899	284.928	0.0593968	0.450468	1	XM_843853.1
837	StP	1	6,891,857	7,176,515	284.659	0.0595128	0.450468
838	Elk	4	71,154,234	71,438,773	284.54	0.0596288	0.450468	1	PLCXD3
839	Rtw	15	30,674,026	30,958,523	284.498	0.0596288	0.450468
840	NFd	25	6,966,988	7,251,461	284.474	0.0596288	0.450468	3	CCNA1,ENSCAFG00000006198,SPG20
841	Gry	6	4,275,339	4,559,777	284.439	0.0596288	0.450468	3	TYW1,ENSCAFG00000021524,ENSCAFG00000021195
842	FSp	24	26,157,008	26,441,356	284.349	0.0596288	0.450468	8	RALY,ENSCAFG00000021644,EIF2S2,Q2LIQ4_CANFA,ENSCAFG00000024610,AHCY,XM_847433.1,ENSCAFG00000027271
843	Elk	17	14,159,965	14,444,237	284.273	0.0597448	0.450468	2	NBAS,DDX1
844	BoC	13	11,920,014	12,204,152	284.139	0.0598608	0.450468	3	EIF3E,ENSCAFG00000000705,XM_847922.1
845	Bgl	27	48,024,423	48,308,557	284.135	0.0598608	0.450468	5	ENSCAFG00000016131,CECR2,SLC25A18,XM_534937.2,BCL2L13
846	BeT	12	19,117,310	19,401,367	284.058	0.0598608	0.450468	1	XM_862561.1
847	Gry	3	31,303,177	31,587,223	284.047	0.0598608	0.450468	3	ENSCAFG00000009191,AP3B1_CANFA,ENSCAFG00000027363
848	NFd	2	21,323,001	21,606,967	283.967	0.0598608	0.450468	2	NSUN6,CACNB2
849	GoS	24	7,908,172	8,191,858	283.687	0.0598608	0.450468	6	CSRP2BP,OVOL2,ENSCAFG00000025907,C20orf72,SNX5,ENSCAFG00000025925
850	FSp	17	30,398,810	30,682,379	283.57	0.0598608	0.450468
851	GRe	3	33,701,236	33,984,799	283.564	0.0598608	0.450468	5	POLK,COL4A3BP,ENSCAFG00000021416,HMGCR,ENSCAFG00000026019
852	BrS	5	67,832,703	68,116,090	283.388	0.0603248	0.452705	1	ZNF469
853	Rtw	37	23,697,887	23,981,060	283.174	0.0603248	0.452705	1	ENSCAFG00000014255
854	BoC	12	21,696,075	21,978,955	282.881	0.0604408	0.452705
855	BrS	17	65,682,846	65,965,676	282.831	0.0604408	0.452705	7	A4PE09_CANFA,ENSCAFG00000027525,ENSCAFG00000023049,FAM19A3,PPM1J,XM_540336.2,MOV10
856	GSh	15	3,212,927	3,495,463	282.537	0.0609049	0.454009	7	ENSCAFG00000002484,Q70Z67_CANFA,XM_539551.2,XM_539552.1,XM_539553.2,SLC2A1,ENSCAFG00000020976
857	NFd	21	14,978,736	15,260,817	282.082	0.0610209	0.454009
858	Elk	4	5,814,043	6,095,637	281.595	0.0613689	0.454009	2	ENSCAFG00000025810,ENSCAFG00000010041
859	Elk	2	72,738,813	73,020,332	281.52	0.0614849	0.454009	7	PUM1,ENSCAFG00000028101,ENSCAFG00000026110,ENSCAFG00000026435,XM_847156.1,ENSCAFG00000026357,SDC3
860	NSD	37	24,204,618	24,486,030	281.413	0.0616009	0.454009	1	SPAG16
861	Elk	34	7,046,606	7,327,930	281.325	0.0617169	0.454009	3	CCT5,FAM173B,ENSCAFG00000027537
862	BoT	2	76,698,466	76,979,710	281.245	0.0617169	0.454009	9	CNKSR1,ZNF593,GRRP1,PDIK1L,TRIM63,SLC30A2,EXTL1,PAFAH2,STMN1
863	BoT	19	12,876,167	13,157,220	281.054	0.0617169	0.454009	2	XM_533290.2,ENSCAFG00000021550
864	ShP	3	4,274,768	4,555,779	281.012	0.0617169	0.454009	1	WDR36
865	BoC	20	24,732,940	25,013,402	280.463	0.0618329	0.454009	1	Q864F3_CANFA
866	JRT	25	5,252,248	5,532,699	280.452	0.0618329	0.454009	1	UFM1
867	Elk	1	6,948,374	7,228,804	280.431	0.062065	0.454009	1	TSHZ1
868	NFd	32	35,968,494	36,248,583	280.09	0.062413	0.454009	3	ANK2,CAMK2D,ENSCAFG00000012153
869	JRT	34	10,159,871	10,439,938	280.068	0.062413	0.454009	5	NSUN2,UBE2QL1,MED10,ENSCAFG00000028193,ENSCAFG00000026893
870	NSD	14	59,964,109	60,244,075	279.967	0.062529	0.454009	2	ENSCAFG00000024319,ENSCAFG00000028243
871	ESt	4	44,272,483	44,552,425	279.943	0.062529	0.454009	3	XP_866832.1,GABRP,KCNIP1
872	Sci	22	33,956,093	34,235,909	279.817	0.062761	0.454009	2	SCEL,SLAIN1
873	GoS	11	50,754,199	51,034,009	279.811	0.062761	0.454009	3	ENSCAFG00000001737,ENSCAFG00000022054,ENSCAFG00000025986
874	EBD	9	42,427,986	42,707,716	279.731	0.062761	0.454009
875	BeT	5	66,488,558	66,768,255	279.698	0.063109	0.454009	11	KIF1B,XM_546767.2,ENSCAFG00000019801,GAS8,DBNDD1,DEF8,Q9N0F8_CANFA,cfa-mir-220a,MSHR_CANFA,TCF25,SPIRE2
876	JRT	8	6,586,131	6,865,721	279.591	0.0632251	0.454009	14	B2CL2_CANFA,SLC22A17,EFS,IL25,CMTM5,MYH7_CANFA,cfa-mir-208a,cfa-mir-208b,NGDN,ZFHX2,THTPA,AP1G2,ENSCAFG00000025487,DHRS2
877	StP	9	30,050,606	30,330,162	279.557	0.0633411	0.454009	6	TOB1,XM_846665.1,SPAG9,ENSCAFG00000026442,NDKA_CANFA,NDKB_CANFA
878	Wei	2	47,210,407	47,489,951	279.545	0.0633411	0.454009	2	ENSCAFG00000027008,XM_544346.1
879	ESt	10	52,691,574	52,971,020	279.447	0.0633411	0.454009	6	Q5SBJ2_CANFA,KCNK12,ENSCAFG00000020673,ENSCAFG00000028352,MSH6,ENSCAFG00000002669
880	GRe	22	33,705,367	33,984,734	279.368	0.0633411	0.454009	1	MYCBP2
881	BoT	19	9,800,733	10,079,899	279.167	0.0633411	0.454009
882	LRe	11	54,979,130	55,258,284	279.155	0.0633411	0.454009	14	ENSCAFG00000002045,ENSCAFG00000018740,ENSCAFG00000026880,RUSC2,FAM166B,TESK1,CD72,SIT1,ENSCAFG00000025983,CCDC107,C9orf100,CA9,TPM2,TLN1
883	Gry	1	57,765,573	58,044,541	278.969	0.0634571	0.454009	7	ENSCAFG00000000842,FGFR1OP,ENSCAFG00000000849,ENSCAFG00000021446,CCR6,GPR31,ENSCAFG00000000854
884	EBD	11	19,932,009	20,210,746	278.738	0.0635731	0.454009	2	ENSCAFG00000000625,SLC12A2
885	NFd	21	15,332,349	15,610,854	278.506	0.0635731	0.454009	1	TMEM135
886	GRe	14	26,976,798	27,254,708	277.911	0.0638051	0.454009	1	NXPH1
887	BoT	35	15,812,918	16,090,748	277.831	0.0638051	0.454009	4	GFOD1,SIRT5,NOL7,RANBP9
888	LRe	21	45,543,667	45,821,496	277.83	0.0638051	0.454009	3	HTATIP2,PRMT3,SLC6A5
889	Dac	14	32,514,729	32,792,482	277.754	0.0638051	0.454009	1	ENSCAFG00000026916
890	Wei	34	5,703,791	5,981,418	277.628	0.0638051	0.454009
891	Rtw	12	55,052,839	55,330,386	277.548	0.0638051	0.454009	1	EPHA7
892	StP	13	11,570,084	11,847,620	277.537	0.0638051	0.454009	1	RSPO2
893	GSh	7	38,837,754	39,115,202	277.449	0.0638051	0.454009	1	ENSCAFG00000024441
894	ESt	30	27,867,034	28,144,420	277.387	0.0638051	0.454009
895	BoC	9	7,268,964	7,546,270	277.307	0.0638051	0.454009	10	UBE2O,SPHK1,PRPSAP1,ENSCAFG00000028119,QRICH2,FAM100B,RNF157,FOXJ1,EXOC7,ENSCAFG00000026526
896	IrW	17	6,692,776	6,969,885	277.11	0.0640371	0.454009
897	CoS	8	18,360,664	18,637,702	277.039	0.0640371	0.454009	3	SLC25A21,ENSCAFG00000013718,ENSCAFG00000013727
898	BoT	20	26,233,092	26,510,086	276.995	0.0640371	0.454009	2	ENSCAFG00000028168,ENSCAFG00000006583
899	Wei	20	26,233,092	26,510,086	276.995	0.0640371	0.454009	2	ENSCAFG00000028168,ENSCAFG00000006583
900	GoS	11	46,028,156	46,304,934	276.779	0.0640371	0.454009	3	HMGN1,C9orf134,ENSCAFG00000025851
901	GSh	22	45,529,198	45,805,896	276.699	0.0640371	0.454009	1	GPC5
902	LRe	1	27,055,561	27,332,052	276.492	0.0642691	0.454009	3	ME2,MRO,ENSCAFG00000020845
903	GRe	28	27,510,673	27,787,100	276.428	0.0642691	0.454009	6	HABP2,NRAP,CASP7,C10orf81,DCLRE1A,NHLRC2
904	BrS	4	44,272,483	44,548,905	276.423	0.0642691	0.454009	3	XP_866832.1,GABRP,KCNIP1
905	EBD	20	5,707,575	5,983,854	276.28	0.0643852	0.454009	7	RAB7A_CANFA,H1FX,C3orf37,COPG,CNBP,ISY1,ENSCAFG00000024835
906	CoS	8	18,719,705	18,995,935	276.231	0.0643852	0.454009	2	MIPOL1,ENSCAFG00000026036
907	GSl	9	4,865,944	5,141,573	275.63	0.0646172	0.454009	1	ENPP7
908	Rtw	19	44,530,077	44,805,565	275.489	0.0647332	0.454009
909	IrW	25	31,744,584	32,020,024	275.441	0.0647332	0.454009	3	INTS9,EXTL3,FZD3
910	ShP	3	83,920,177	84,195,436	275.26	0.0647332	0.454009
911	StP	37	27,746,690	28,021,875	275.186	0.0647332	0.454009	8	RUFY4,CXCR2_CANFA,XM_536065.2,ARPC2,ENSCAFG00000014623,AAMP_CANFA,A9QW83_CANFA,TMBIM1
912	EBD	30	33,845,318	34,120,476	275.159	0.0647332	0.454009	1	SMAD6
913	IrW	26	40,369,168	40,644,279	275.112	0.0648492	0.454009	1	ENSCAFG00000022516
914	TYo	2	41,144,023	41,419,108	275.086	0.0648492	0.454009	1	ENSCAFG00000028165
915	EBD	4	20,864,639	21,139,474	274.836	0.0649652	0.454009
916	Bgl	14	40,884,340	41,159,135	274.796	0.0650812	0.454009	2	ENSCAFG00000027193,MPP6
917	BrS	14	12,073,584	12,348,228	274.645	0.0650812	0.454009	2	GRM8,cfa-mir-592
918	Rtw	13	50,533,428	50,808,009	274.582	0.0650812	0.454009	4	ENSCAFG00000002090,TMEM165,CLOCK,PDCL2
919	BoT	19	14,469,190	14,743,665	274.476	0.0651972	0.454323
920	TYo	38	25,328,923	25,603,173	274.251	0.0655452	0.455262	6	FCRL6,CRP,Q70ZA9_CANFA,ENSCAFG00000011771,OR10J5,XM_847793.1
921	Rtw	12	56,364,719	56,638,844	274.126	0.0655452	0.455262	1	ENSCAFG00000020939
922	Dac	21	24,339,172	24,613,270	274.099	0.0655452	0.455262	4	PAK1,GDPD4,ENSCAFG00000025150,ENSCAFG00000005074
923	CoS	1	82,213,018	82,486,892	273.875	0.0657773	0.456379	1	TLE4
924	ShP	3	3,983,276	4,256,968	273.693	0.0660093	0.457493	2	STARD4,CAMK4
925	JRT	8	47,566,810	47,840,217	273.408	0.0664733	0.459218	1	PCNX
926	LRe	15	24,189,207	24,462,587	273.381	0.0664733	0.459218	1	ENSCAFG00000005762
927	NSD	4	76,625,977	76,899,294	273.318	0.0664733	0.459218	4	ENSCAFG00000018809,ENSCAFG00000027904,RAI14,ENSCAFG00000028130
928	Dob	28	16,012,713	16,285,854	273.142	0.0665893	0.459524	8	CWF19L1,BLOC1S2,PKD2L1,SCD,WNT8B,SEC31B,NDUFB8,HIF1AN
929	CoS	8	46,350,788	46,623,689	272.902	0.0671694	0.459718	6	C1orf65,ENSCAFG00000028118,KIAA0247,ENSCAFG00000022857,SFRS5,SLC10A1
930	GoS	8	46,350,788	46,623,689	272.902	0.0671694	0.459718	6	C1orf65,ENSCAFG00000028118,KIAA0247,ENSCAFG00000022857,SFRS5,SLC10A1
931	ESt	8	46,350,788	46,623,689	272.902	0.0671694	0.459718	6	C1orf65,ENSCAFG00000028118,KIAA0247,ENSCAFG00000022857,SFRS5,SLC10A1
932	Elk	1	56,719,630	56,992,468	272.839	0.0671694	0.459718	1	ENSCAFG00000023764
933	Dac	30	5,435,465	5,708,244	272.78	0.0672854	0.459718	5	Q5W2C2_CANFA,Q9GKL5_CANFA,XM_844513.1,AQR,ZNF770
934	BeT	19	5,190,660	5,463,342	272.683	0.0672854	0.459718	7	TBC1D9,ENSCAFG00000028185,UCP1_CANFA,ENSCAFG00000027051,ELMOD2,CLGN,SCOC
935	ShP	19	5,190,660	5,463,342	272.683	0.0672854	0.459718	7	TBC1D9,ENSCAFG00000028185,UCP1_CANFA,ENSCAFG00000027051,ELMOD2,CLGN,SCOC
936	TYo	X	104,997,233	105,269,822	272.59	0.0672854	0.459718
937	StP	27	47,944,794	48,217,359	272.566	0.0675174	0.459718	4	CECR1,ENSCAFG00000021131,ENSCAFG00000016131,CECR2
938	StP	28	32,559,187	32,831,720	272.534	0.0675174	0.459718	4	GRK5,RGS10,TIAL1,BAG3
939	CoS	5	78,497,024	78,769,488	272.465	0.0676334	0.459718	8	BCAR1,XM_847864.1,CTR2_CANFA,XM_536782.2,ZFP1,LDHD,ZNRF1,WDR59
940	Elk	15	53,164,028	53,436,485	272.458	0.0676334	0.459718	3	FBXW7,ENSCAFG00000021451,ENSCAFG00000008160
941	NSD	5	65,354,461	65,626,903	272.443	0.0676334	0.459718	5	CAH6_CANFA,SLC2A5,GPR157,cfa-mir-34a,H6PD
942	Dac	16	10,524,596	10,796,880	272.285	0.0677494	0.459718	3	AGK,ENSCAFG00000022208,XM_539881.2
943	FSp	5	72,536,241	72,808,418	272.178	0.0679814	0.459718
944	NFd	1	4,365,297	4,637,254	271.958	0.0679814	0.459718	2	SALL3,ENSCAFG00000000014
945	NSD	32	38,843,856	39,115,799	271.944	0.0679814	0.459718	1	ENSCAFG00000012288
946	JRT	2	77,482,903	77,754,774	271.872	0.0679814	0.459718	2	ENSCAFG00000027966,Q5XTY6_CANFA
947	JRT	11	27,214,445	27,486,294	271.85	0.0679814	0.459718	1	TRPC7
948	BoT	1	54,488,258	54,759,984	271.727	0.0684455	0.461395	1	ENSCAFG00000000770
949	EBD	8	52,827,221	53,098,939	271.719	0.0684455	0.461395	6	ENSCAFG00000025261,ENSCAFG00000017155,C14orf4,KIAA1737,ZDHHC22,TMEM63C
950	GoS	3	72,596,815	72,868,505	271.691	0.0684455	0.461395	2	NSG1,STX18
951	Rtw	21	50,375,716	50,647,238	271.523	0.0686775	0.462472	3	ANO3,MUC15,SLC5A12
952	NSD	4	7,227,121	7,498,455	271.335	0.0692575	0.465007	5	LYST,GNG4,ENSCAFG00000011249,B3GALNT2,TBCE
953	GSh	17	14,428,649	14,699,965	271.317	0.0692575	0.465007	4	DDX1,XM_540089.2,ENSCAFG00000003714,MYCN
954	FSp	15	39,690,799	39,962,039	271.241	0.0694896	0.465007
955	ShP	3	75,837,390	76,108,602	271.213	0.0694896	0.465007	5	KLB,RFC1,ENSCAFG00000026870,WDR19,KLHL5
956	IrW	23	25,918,473	26,189,618	271.146	0.0694896	0.465007
957	LRe	23	25,918,473	26,189,618	271.146	0.0694896	0.465007
958	Sci	8	53,944,971	54,215,990	271.02	0.0699536	0.467135	1	NRXN1
959	Dob	19	12,914,817	13,185,810	270.994	0.0699536	0.467135	1	ENSCAFG00000021550
960	Elk	X	105,245,495	105,516,440	270.946	0.0701856	0.468196	6	ARHGAP36,ENSCAFG00000022172,OR11A1,IGSF1,ENSCAFG00000023200,ENSCAFG00000023198
961	BoC	10	11,169,956	11,440,860	270.905	0.0703016	0.468482	1	ENSCAFG00000022943
962	Elk	1	103,937,894	104,208,642	270.749	0.0708817	0.471857	2	DUXA,ZIM2
963	Dac	3	65,754,103	66,024,768	270.666	0.0712297	0.47319	4	CLRN2,QDPR,ENSCAFG00000015116,ENSCAFG00000015120
964	GoS	16	18,475,189	18,745,846	270.658	0.0712297	0.47319	2	PRKAG2,ENSCAFG00000021952
965	StP	36	24,484,892	24,755,520	270.629	0.0713457	0.473469	1	PDE11A
966	BeT	28	31,862,331	32,132,658	270.328	0.0718097	0.476055	2	PRLHR,C10orf46
967	GSh	15	29,965,415	30,235,429	270.015	0.0726218	0.479948
968	GSl	21	11,863,063	12,133,075	270.013	0.0726218	0.479948
969	GSh	4	20,133,320	20,403,326	270.007	0.0726218	0.479948	2	ENSCAFG00000004199,ENSCAFG00000019032
970	NSD	21	46,775,001	47,044,935	269.935	0.0728538	0.480985	1	ENSCAFG00000026076
971	GoS	6	12,324,662	12,594,267	269.606	0.0734339	0.482329	21	PVRIG,ENSCAFG00000014526,ENSCAFG00000026023,GPC2,GAL3ST4,ENSCAFG00000023365,XM_844641.1,C7orf59,ENSCAFG00000014562,ENSCAFG00000014564,MBLAC1,CNPY4,TAF6,AP4M1,MCM7,cfa-mir-106b,cfa-mir-93,cfa-mir-25,COPS6,ZNF3,ENSCAFG00000027360
972	Bgl	11	37,802,625	38,072,199	269.575	0.0734339	0.482329	1	NFIB
973	GoS	1	96,192,108	96,461,676	269.569	0.0734339	0.482329	8	ENSCAFG00000002085,RCL1,ENSCAFG00000027229,cfa-mir-101-2,ENSCAFG00000021196,ENSCAFG00000023391,ENSCAFG00000027926,JAK2
974	GSl	1	80,461,138	80,730,659	269.522	0.0734339	0.482329	1	Q6JDG1_CANFA
975	Dac	12	42,223,211	42,492,714	269.504	0.0734339	0.482329	3	ENSCAFG00000002790,ENSCAFG00000028070,ENSCAFG00000023918
976	GoS	5	51,265,565	51,534,992	269.428	0.0738979	0.483888	2	TM2D1,NFIA
977	BeT	22	15,762,653	16,032,076	269.424	0.0738979	0.483888	1	ENSCAFG00000027105
978	NFd	8	17,222,758	17,492,159	269.402	0.0738979	0.483888	5	INSM2,RALGAPA1,ENSCAFG00000028355,ENSCAFG00000026856,BRMS1L
979	BMD	9	45,613,861	45,883,160	269.3	0.0742459	0.484975	4	NLK,ENSCAFG00000028000,ENSCAFG00000020788,ENSCAFG00000023171
980	Wei	10	40,284,316	40,553,335	269.02	0.074478	0.484975	4	ENSCAFG00000021649,ENSCAFG00000020748,UXS1,C2orf40
981	GoS	28	6,084,318	6,353,309	268.992	0.074478	0.484975
982	Eur	15	45,840,380	46,109,304	268.925	0.074478	0.484975	1	ENSCAFG00000021377
983	BoT	1	49,313,219	49,582,132	268.914	0.074478	0.484975	1	ENSCAFG00000023184
984	Dob	3	64,749,333	65,018,201	268.869	0.074594	0.484975	9	MXD4,HAUS3,ENSCAFG00000021284,POLN,NAT8L,C4orf48,WHSC2,WHSC1,ENSCAFG00000028375
985	BMD	20	24,694,724	24,963,581	268.858	0.074594	0.484975	2	ENSCAFG00000028298,Q864F3_CANFA
986	Dob	28	15,538,728	15,807,372	268.645	0.075522	0.49051	6	XM_846248.1,ENTPD7,COX15,CUTC,NP_001003081.1,DNMBP
987	BeT	21	6,751,207	7,019,773	268.567	0.0757541	0.491519
988	ESt	1	40,468,955	40,737,343	268.389	0.0761021	0.492542	1	XM_845272.1
989	Sci	17	52,358,502	52,626,832	268.331	0.0763341	0.492542	4	NAT8,ENSCAFG00000024025,XM_533005.2,ENSCAFG00000008835
990	GSl	7	5,976,752	6,245,052	268.301	0.0763341	0.492542	1	NR5A2
991	BoC	17	31,058,225	31,326,396	268.172	0.0764501	0.492542
992	GSl	3	36,924,413	37,192,535	268.123	0.0764501	0.492542	1	GABRB3
993	Elk	2	73,259,408	73,527,466	268.059	0.0764501	0.492542	1	ENSCAFG00000026319
994	Wei	11	29,734,366	30,002,381	268.016	0.0764501	0.492542	7	ENSCAFG00000027481,ENSCAFG00000028400,ENSCAFG00000025850,MATR3,ENSCAFG00000026794,Q864R3_CANFA,KIAA2026
995	GSh	21	25,899,858	26,167,793	267.936	0.0765661	0.492793	5	MOGAT2,MAP6,SERPINH1,GDPD5,KLHL35
996	LRe	1	50,063,661	50,331,581	267.921	0.0766821	0.493044	2	ENSCAFG00000000618,ENSCAFG00000028358
997	BoC	9	6,149,205	6,417,009	267.805	0.0769142	0.493795
998	Gry	2	54,158,922	54,426,707	267.786	0.0770302	0.493795	8	CENPK,PPWD1,TRIM23,ENSCAFG00000027832,C5orf44,SGTB,NLN,ENSCAFG00000007518
999	BoT	10	10,832,919	11,100,691	267.773	0.0770302	0.493795	2	MSRB3,ENSCAFG00000027222
1000	BMD	13	4,218,309	4,485,990	267.682	0.0772622	0.494541	2	VPS13B,ENSCAFG00000025782
1001	Rtw	3	78,507,473	78,775,036	267.564	0.0773782	0.494541	1	ARAP2
1002	Dob	17	36,308,275	36,575,777	267.503	0.0773782	0.494541	1	XM_540162.2
1003	Gry	17	21,433,602	21,701,011	267.41	0.0778422	0.49701	9	XM_532889.2,UBXN2A,MFSD2B,C2orf44,XM_540107.1,FKBP1B,TP53I3,PFN4,ITSN2
1004	EBD	3	82,650,187	82,917,515	267.329	0.0781903	0.498473
1005	Bgl	13	33,913,025	34,180,268	267.244	0.0785383	0.498473	2	cfa-mir-30b,cfa-mir-30d
1006	BMD	11	57,353,092	57,620,315	267.224	0.0785383	0.498473	4	SHB,ENSCAFG00000002399,ENSCAFG00000021920,ALDH1B1
1007	Gry	20	9,497,261	9,764,482	267.222	0.0785383	0.498473	2	ENSCAFG00000023323,C3orf31
1008	Rtw	X	73,166,462	73,433,675	267.214	0.0785383	0.498473	2	ENSCAFG00000023321,XM_538098.2
1009	Dac	9	6,366,494	6,633,689	267.196	0.0785383	0.498473	1	2005-08-31
1010	Bgl	5	65,662,615	65,929,595	266.981	0.0794664	0.498999	4	SPSB1,SLC25A33,TMEM201,PIK3CD
1011	Wei	18	8,005,885	8,272,802	266.918	0.0795824	0.498999	2	ENSCAFG00000027740,ENSCAFG00000020721
1012	IrW	29	23,516,204	23,783,073	266.87	0.0798144	0.498999
1013	StP	8	74,606,087	74,872,909	266.823	0.0798144	0.498999	4	TDRD9,ASPG,cfa-mir-203,KIF26A
1014	BoT	1	51,692,647	51,959,455	266.809	0.0798144	0.498999	1	ENSCAFG00000021163
1015	Rtw	15	46,864,453	47,131,250	266.798	0.0798144	0.498999	1	XM_532680.2
1016	Rtw	5	55,341,696	55,608,357	266.662	0.0802784	0.498999	3	DAB1,C8B,C8A
1017	BrS	10	5,412,951	5,679,587	266.637	0.0803944	0.498999
1018	BoC	34	12,184,352	12,450,981	266.63	0.0803944	0.498999
1019	BeT	12	25,015,310	25,281,909	266.6	0.0805104	0.498999	3	ENSCAFG00000025946,XM_538970.2,FAM83B
1020	NFd	6	7,095,917	7,362,514	266.598	0.0805104	0.498999	1	ENSCAFG00000023174
1021	CoS	8	35,155,683	35,422,222	266.54	0.0805104	0.498999	2	C14orf101,ENSCAFG00000027420
1022	JRT	5	66,968,865	67,235,346	266.482	0.0805104	0.498999	4	RPL13,ENSCAFG00000021886,SPG7,ANKRD11
1023	Sci	32	7,190,929	7,457,316	266.388	0.0806265	0.498999	5	ANTXR2,ENSCAFG00000022388,ENSCAFG00000004928,ENSCAFG00000005599,PRDM8
1024	TYo	5	49,411,581	49,677,964	266.384	0.0806265	0.498999	3	PGM1,EFCAB7,ENSCAFG00000028030
1025	JRT	11	25,405,929	25,672,268	266.34	0.0807425	0.498999	5	NP_001003063.1,CDKL3,UBE2B,CDKN2AIPNL,PHF15
1026	GSl	19	7,190,775	7,457,083	266.309	0.0808585	0.498999	1	A2TC22_CANFA
1027	NSD	X	27,523,766	27,790,066	266.301	0.0808585	0.498999	1	ENSCAFG00000013767
1028	JRT	32	7,915,702	8,181,992	266.291	0.0809745	0.498999	2	ENSCAFG00000024794,BMP3
1029	NFd	36	5,342,247	5,608,504	266.258	0.0809745	0.498999	1	NR4A2
1030	GSh	19	37,666,248	37,932,397	266.15	0.0809745	0.498999
1031	GRe	1	80,966,105	81,232,089	265.985	0.0812065	0.498999
1032	Elk	1	40,392,162	40,658,068	265.907	0.0815545	0.498999	1	XM_845272.1
1033	Wei	1	31,718,723	31,984,626	265.904	0.0815545	0.498999	5	PDE7B,FAM54A,BCLAF1,ENSCAFG00000026399,MAP7
1034	GoS	1	31,718,723	31,984,626	265.904	0.0815545	0.498999	5	PDE7B,FAM54A,BCLAF1,ENSCAFG00000026399,MAP7
1035	ESt	1	31,718,723	31,984,626	265.904	0.0815545	0.498999	5	PDE7B,FAM54A,BCLAF1,ENSCAFG00000026399,MAP7
1036	Rtw	8	36,430,688	36,696,549	265.862	0.0815545	0.498999	5	C14orf37,ACTR10,PSMA3,ENSCAFG00000021761,ARID4A
1037	FSp	8	38,459,199	38,724,993	265.795	0.0815545	0.498999	5	ENSCAFG00000015608,C14orf39,SIX6,ENSCAFG00000025127,SIX1
1038	CoS	8	38,459,199	38,724,993	265.795	0.0815545	0.498999	5	ENSCAFG00000015608,C14orf39,SIX6,ENSCAFG00000025127,SIX1
1039	BrS	4	77,179,027	77,444,787	265.761	0.0815545	0.498999	2	ADAMTS12,TARS
1040	LRe	X	105,250,731	105,516,440	265.71	0.0815545	0.498999	6	ARHGAP36,ENSCAFG00000022172,OR11A1,IGSF1,ENSCAFG00000023200,ENSCAFG00000023198
1041	Sci	11	25,599,398	25,865,078	265.681	0.0816705	0.498999	6	PHF15,SAR1B,SEC24A,ENSCAFG00000001039,CAMLG,DDX46
1042	Gry	24	26,157,008	26,422,684	265.677	0.0816705	0.498999	8	RALY,ENSCAFG00000021644,EIF2S2,Q2LIQ4_CANFA,ENSCAFG00000024610,AHCY,XM_847433.1,ENSCAFG00000027271
1043	GSl	26	27,790,384	28,055,977	265.594	0.0816705	0.498999	4	YWHAH,ENSCAFG00000013339,NP_001007142.1,SLC5A4
1044	Sci	24	26,953,738	27,219,322	265.585	0.0816705	0.498999	9	Q6PXD9_CANFA,MYH7B,cfa-mir-499,TRPC4AP,ENSCAFG00000007920,EDEM2,PROCR,MMP24,ENSCAFG00000025048
1045	BrS	28	12,860,897	13,126,465	265.569	0.0816705	0.498999	4	TM9SF3,PIK3AP1,XM_534978.2,ENSCAFG00000021654
1046	BMD	2	75,606,644	75,872,192	265.549	0.0816705	0.498999	8	ENSCAFG00000012095,WASF2,XM_544470.1,CD164L2,MAP3K6,SYTL1,TMEM222,WDTC1
1047	JRT	6	12,075,668	12,341,209	265.542	0.0816705	0.498999	15	TFR2,MOSPD3,PCOLCE,FBXO24,LRCH4,ENSCAFG00000014343,AGFG2,C7orf51,TSC22D4,C7orf47,MEPCE,ZCWPW1,ENSCAFG00000014493,PVRIG,ENSCAFG00000014526
1048	GSl	38	7,773,232	8,038,708	265.477	0.0817865	0.498999
1049	NFd	19	27,542,564	27,808,035	265.472	0.0817865	0.498999	1	ENSCAFG00000027515
1050	Sci	8	4,756,512	5,021,922	265.411	0.0821346	0.498999	7	RIN3,ENSCAFG00000009502,LGMN,GOLGA5,CHGA,ITPK1,ENSCAFG00000027952
1051	JRT	3	60,978,779	61,244,168	265.39	0.0821346	0.498999	6	CTSH,MORF4L1,ADAMTS7,TBC1D2B,IDH3A,ACSBG1
1052	NSD	14	26,662,511	26,927,879	265.369	0.0821346	0.498999	4	ICA1,ENSCAFG00000027961,ENSCAFG00000027279,ENSCAFG00000028244
1053	GSh	13	45,613,194	45,878,513	265.32	0.0824826	0.498999	2	COX7B2,GABRA4
1054	NFd	9	50,164,666	50,429,928	265.263	0.0825986	0.498999	3	RAP1GAP2,ENSCAFG00000019307,Q70ZK7_CANFA
1055	ShP	13	16,665,562	16,930,813	265.252	0.0825986	0.498999	1	ENSCAFG00000020908
1056	JRT	10	57,640,816	57,906,064	265.249	0.0825986	0.498999	1	ASB3
1057	Elk	4	74,175,220	74,440,418	265.199	0.0825986	0.498999	3	GDNF,WDR70,ENSCAFG00000018679
1058	BrS	9	51,321,528	51,586,633	265.106	0.0828306	0.498999	7	CACNA1B,EHMT1,ARRDC1,ZMYND19,WDR85,MRPL41,PNPLA7
1059	Dac	30	9,434,408	9,699,424	265.017	0.0829466	0.498999
1060	TYo	18	23,178,883	23,443,867	264.985	0.0830626	0.498999	2	GNAT3,CD36
1061	GRe	24	39,250,849	39,515,832	264.984	0.0830626	0.498999	6	XM_849024.1,SLC9A8,Q1JUL3_CANFA,SPATA2,RNF114,Q8WNR6_CANFA
1062	Eur	25	21,363,746	21,628,675	264.93	0.0830626	0.498999	6	PSPC1,MPHOSPH8,PARP4,CENPJ,RPL34,RNF17
1063	IrW	2	19,039,909	19,304,805	264.897	0.0830626	0.498999	1	ENSCAFG00000027663
1064	GoS	1	112,563,396	112,828,275	264.88	0.0830626	0.498999	17	NOVA2,NANOS2,MYPOP,IRF2BP1,FOXA3,ENSCAFG00000023839,ENSCAFG00000004376,RSPH6A,DMWD,DMPK,SIX5,FBXO46,QPCTL,ENSCAFG00000004403,GIPR,EML2,cfa-mir-330
1065	StP	37	27,071,033	27,335,862	264.83	0.0830626	0.498999
1066	Dac	8	32,934,737	33,199,553	264.817	0.0830626	0.498999	1	Q9MZV5_CANFA
1067	Eur	30	11,558,760	11,823,449	264.69	0.0836427	0.500832	5	RPAP1,TYRO3,MGA,ENSCAFG00000025051,MAPKBP1
1068	BrS	1	55,569,141	55,833,781	264.641	0.0836427	0.500832
1069	GRe	8	10,454,124	10,718,744	264.621	0.0837587	0.500832
1070	Dac	3	43,552,387	43,816,982	264.596	0.0837587	0.500832	1	ADAMTS17
1071	FSp	17	31,352,987	31,617,550	264.564	0.0837587	0.500832
1072	FSp	3	4,695,416	4,959,855	264.44	0.0843387	0.50336	2	TMEM232,ENSCAFG00000023679
1073	JRT	20	45,922,768	46,187,197	264.43	0.0843387	0.50336	2	LARS2,ENSCAFG00000026401
1074	BMD	5	46,886,644	47,150,997	264.354	0.0844548	0.503583	1	PDE4B
1075	NFd	21	9,228,255	9,492,553	264.299	0.0848028	0.505188	4	PIWIL4,FUT4,ANKRD49,Q5SBJ0_CANFA
1076	EBD	26	3,793,572	4,057,844	264.273	0.0849188	0.505409	9	NOC4L,DDX51,ENSCAFG00000024929,ENSCAFG00000026131,ENSCAFG00000006377,PUS1,ULK1,MMP17,SFRS8
1077	JRT	7	57,979,660	58,243,842	264.183	0.0852668	0.505762	1	DTNA
1078	IrW	37	4,922,471	5,186,598	264.128	0.0854988	0.505762
1079	GSl	4	28,756,378	29,020,463	264.086	0.0857309	0.505762	1	ZNF503
1080	Wei	10	50,435,520	50,699,600	264.081	0.0857309	0.505762	2	SIX3,SIX2
1081	Bgl	12	40,013,437	40,277,425	263.989	0.0857309	0.505762	4	FILIP1,ENSCAFG00000002710,SENP6,ENSCAFG00000027841
1082	Sci	3	28,130,150	28,394,120	263.971	0.0857309	0.505762	2	ATG10,ENSCAFG00000024012
1083	Gry	9	49,721,325	49,985,248	263.924	0.0857309	0.505762	10	SMG6,SRR,TSR1,ENSCAFG00000026040,ENSCAFG00000025963,SGSM2,MNT,METT10D,ENSCAFG00000026329,PAFAH1B1
1084	BoC	38	21,071,743	21,335,632	263.89	0.0858469	0.505762	2	XM_846259.1,ENSCAFG00000027557
1085	JRT	25	6,966,988	7,230,870	263.883	0.0858469	0.505762	2	CCNA1,ENSCAFG00000006198
1086	CoS	29	5,397,672	5,661,549	263.878	0.0858469	0.505762	1	SNTG1
1087	Dob	11	24,075,603	24,339,470	263.868	0.0858469	0.505762	8	ANKRD43,SHROOM1,GDF9,UQCRQ,LEAP2,AFF4,ENSCAFG00000027084,HSP74_CANFA
1088	Sci	13	52,570,352	52,834,198	263.847	0.0859629	0.50598
1089	ESt	19	43,241,552	43,505,232	263.681	0.0864269	0.508244	1	ENSCAFG00000005167
1090	StP	9	35,371,920	35,635,551	263.632	0.0865429	0.508459	1	MSI2
1091	BoC	22	26,912,300	27,175,812	263.513	0.0867749	0.509355	4	ENSCAFG00000004962,XM_542604.2,ENSCAFG00000004965,KLHL1
1092	Dac	14	31,568,024	31,831,477	263.454	0.086891	0.50957	4	ETV1,ENSCAFG00000027027,ENSCAFG00000024362,ENSCAFG00000021363
1093	NSD	3	78,744,858	79,008,271	263.414	0.087239	0.510633	1	ENSCAFG00000024681
1094	Eur	9	51,267,810	51,531,181	263.372	0.087239	0.510633	4	CACNA1B,EHMT1,ARRDC1,ZMYND19
1095	Dob	31	10,686,187	10,949,516	263.33	0.087471	0.510633
1096	ShP	13	40,838,906	41,102,218	263.313	0.087471	0.510633	18	ADCK5,CPSF1,ENSCAFG00000001607,VPS28,NFKBIL2,CYHR1,KIFC2,FOXH1,PPP1R16A,GPT,MFSD3,RECQL4,LRRC14,LRRC24,ARHGAP39,COMMD5,ZNF7,ENSCAFG00000024976
1097	IrW	13	4,466,720	4,730,009	263.29	0.087471	0.510633	3	VPS13B,cfa-mir-599,cfa-mir-875
1098	FSp	14	28,890,583	29,153,783	263.201	0.087819	0.512198	1	PHF14
1099	Bgl	32	34,442,594	34,705,699	263.106	0.0882831	0.513402
1100	CoS	1	101,698,682	101,961,754	263.073	0.0882831	0.513402	8	FGD3,XM_848193.1,BICD2,IPPK,XM_533561.2,ECM2,ENSCAFG00000024350,ASPN
1101	GSl	33	6,354,840	6,617,875	263.036	0.0885151	0.513402	3	ENSCAFG00000021880,ENSCAFG00000020791,ENSCAFG00000026462
1102	NFd	2	18,566,497	18,829,526	263.03	0.0885151	0.513402	2	ENSCAFG00000020219,ZNF438
1103	ESt	21	12,556,163	12,819,000	262.838	0.0887471	0.513402
1104	Wei	19	20,071,298	20,334,120	262.823	0.0887471	0.513402	3	ENSCAFG00000024724,ENSCAFG00000026772,ENSCAFG00000003988
1105	GRe	24	38,359,056	38,621,844	262.789	0.0887471	0.513402	2	PREX1,ARFGEF2
1106	BoC	3	6,974,365	7,237,134	262.77	0.0887471	0.513402
1107	Sci	3	6,974,365	7,237,134	262.77	0.0887471	0.513402
1108	StP	16	13,675,803	13,938,462	262.66	0.0894432	0.516439	2	CREB3L2,DGKI
1109	NFd	1	120,064,432	120,327,037	262.606	0.0894432	0.516439	12	DMKN,KTDAP_CANFA,FFAR2,XM_850391.1,FFAR1,CD22,MAG,HEPC_CANFA,USF2,LSR,FAM187B,FXYD5
1110	Bgl	10	10,907,439	11,169,956	262.518	0.0896752	0.516439	2	MSRB3,ENSCAFG00000027222
1111	ESt	10	10,907,439	11,169,956	262.518	0.0896752	0.516439	2	MSRB3,ENSCAFG00000027222
1112	GRe	10	10,907,439	11,169,956	262.518	0.0896752	0.516439	2	MSRB3,ENSCAFG00000027222
1113	BoC	16	9,231,481	9,493,861	262.381	0.0902552	0.517996	10	EPHA1,ZYX,FAM131B,CLCN1_CANFA,CASP2,TMEM139,XM_532742.2,Q2ABD0_CANFA,Q2ABD1_CANFA,PIP
1114	EBD	13	9,294,240	9,556,551	262.312	0.0904872	0.517996	1	ENSCAFG00000025414
1115	LRe	17	61,296,107	61,558,364	262.258	0.0906032	0.517996	4	ACP6,CXA5_CANFA,GJA8,XM_540275.2
1116	StP	1	26,845,341	27,107,528	262.188	0.0908353	0.517996	4	MEX3C,Q6JDJ5_CANFA,ELAC1,ME2
1117	Elk	5	63,287,197	63,549,364	262.168	0.0908353	0.517996	10	ESPN,TNFRSF25,PLEKHG5,NOL9,TAS1R1,ZBTB48,KLHL21,PHF13,THAP3,DNAJC11
1118	ShP	6	17,978,221	18,240,385	262.165	0.0908353	0.517996	1	MAD1L1
1119	BoC	5	12,117,732	12,379,889	262.158	0.0908353	0.517996	2	PKNOX2,TMEM218
1120	BeT	3	15,151,502	15,413,657	262.156	0.0908353	0.517996	1	ENSCAFG00000020670
1121	FSp	3	46,950,934	47,213,014	262.081	0.0908353	0.517996	3	ENSCAFG00000021411,NR2F2,ENSCAFG00000027066
1122	TYo	24	24,675,431	24,937,501	262.071	0.0908353	0.517996	3	KIF3B,ASXL1,C20orf112
1123	GSl	17	21,864,380	22,126,211	261.832	0.0908353	0.517996	3	NCOA1,C2orf79,CENPO
1124	Elk	1	104,437,408	104,699,147	261.74	0.0910673	0.518396	6	ZNF707,XM_848788.1,ENSCAFG00000002476,ZNF582,ENSCAFG00000024243,ZNF667
1125	GoS	6	8,882,290	9,144,002	261.713	0.0910673	0.518396	4	GTF2IRD1,ENSCAFG00000028108,CLIP2,RFC2
1126	LRe	X	105,582,477	105,844,129	261.653	0.0914153	0.518533	6	ENSCAFG00000018811,ENSCAFG00000018815,ENSCAFG00000023138,ENSCAFG00000023137,ENSCAFG00000023108,OR13H1
1127	ShP	4	5,337,682	5,599,320	261.639	0.0914153	0.518533	2	Q8WN72_CANFA,ENSCAFG00000026154
1128	FSp	32	29,892,353	30,153,991	261.639	0.0914153	0.518533	2	TBCK,XM_545016.2
1129	LRe	12	20,833,796	21,095,428	261.633	0.0914153	0.518533	4	Q30KU2_CANFA,Q30KU1_CANFA,ENSCAFG00000026674,ENSCAFG00000020932
1130	GSl	14	11,064,246	11,325,871	261.626	0.0915313	0.518731	4	LEP_CANFA,cfa-mir-129-1,SND1,LRRC4
1131	Dac	16	7,034,316	7,295,749	261.434	0.0921114	0.520631	1	ENSCAFG00000022418
1132	Elk	3	12,471,917	12,733,324	261.408	0.0922274	0.520631	1	ENSCAFG00000007617
1133	GSh	17	21,714,913	21,976,133	261.221	0.0928074	0.520631
1134	Dac	32	7,547,610	7,808,816	261.207	0.0928074	0.520631	1	XM_544947.2
1135	LRe	3	68,745,255	69,006,427	261.173	0.0928074	0.520631
1136	FSp	1	96,646,103	96,907,259	261.157	0.0928074	0.520631	5	CD274,PDCD1LG2,ENSCAFG00000025949,KIAA1432,ENSCAFG00000028315
1137	GSh	3	56,446,713	56,707,855	261.143	0.0928074	0.520631	4	CRTC3,IQGAP1,ENSCAFG00000022698,ZNF774
1138	NFd	5	35,545,353	35,806,461	261.109	0.0928074	0.520631	13	ATP1B2,P53_CANFA,WRAP53,DNAH2,KDM6B,TMEM88,LSMD1,CYB5D1,CHD3,ENSCAFG00000028299,KCNAB3,TRAPPC1,CNTROB
1139	CoS	11	11,626,254	11,887,350	261.097	0.0928074	0.520631	2	TNFAIP8,HSD17B4
1140	BrS	5	45,661,442	45,922,522	261.081	0.0928074	0.520631	6	DHRS7B,TMEM11,ENSCAFG00000018528,MAP2K3,O62726_CANFA,ENSCAFG00000018533
1141	BeT	15	26,488,630	26,749,707	261.078	0.0929234	0.520631	1	PPFIA2
1142	NFd	22	3,478,647	3,739,712	261.066	0.0929234	0.520631	2	INTS6,FAM124A
1143	CoS	17	14,034,880	14,295,937	261.058	0.0929234	0.520631	1	NBAS
1144	Dac	3	16,297,901	16,558,921	261.021	0.0932715	0.520693	1	ELL2
1145	GSh	19	35,397,250	35,658,259	261.01	0.0932715	0.520693
1146	BeT	15	44,140,137	44,401,143	261.007	0.0932715	0.520693	1	IGF1_CANFA
1147	JRT	15	44,140,137	44,401,143	261.007	0.0932715	0.520693	1	IGF1_CANFA
1148	TYo	22	9,730,303	9,991,259	260.957	0.0935035	0.520693	2	C13orf31,CCDC122
1149	GoS	16	3,803,603	4,064,526	260.924	0.0935035	0.520693	3	IGFBP3,IGFBP1,ADCY1
1150	CoS	10	10,265,925	10,526,832	260.908	0.0935035	0.520693	3	RASSF3,Q32KH4_CANFA,TBC1D30
1151	GSh	19	38,745,824	39,006,662	260.839	0.0938515	0.520971	2	ENSCAFG00000005003,ENSCAFG00000025015
1152	Eur	19	4,495,739	4,756,513	260.775	0.0941995	0.520971	2	ENSCAFG00000003628,ZNF330
1153	Rtw	15	45,245,996	45,506,714	260.719	0.0943155	0.520971	5	NT5DC3,ENSCAFG00000021528,ENSCAFG00000007401,ENSCAFG00000007414,ENPL_CANFA
1154	LRe	1	10,574,161	10,834,825	260.665	0.0944316	0.520971
1155	LRe	11	47,229,295	47,489,929	260.635	0.0946636	0.520971
1156	ShP	6	24,724,921	24,985,533	260.613	0.0946636	0.520971	3	CACNG3,PRKCB,ENSCAFG00000027307
1157	BoT	36	13,810,540	14,071,137	260.598	0.0946636	0.520971	4	ENSCAFG00000023737,GALNT3,ENSCAFG00000027822,TTC21B
1158	IrW	24	26,202,760	26,463,325	260.566	0.0946636	0.520971	8	RALY,ENSCAFG00000021644,EIF2S2,Q2LIQ4_CANFA,ENSCAFG00000024610,AHCY,XM_847433.1,ENSCAFG00000027271
1159	ESt	12	49,660,866	49,921,422	260.557	0.0946636	0.520971	5	ZNF292,GJB7,ENSCAFG00000002351,C6orf162,C6orf163
1160	NFd	2	65,209,708	65,470,214	260.507	0.0946636	0.520971	4	CHD9,ENSCAFG00000021839,ENSCAFG00000009708,ENSCAFG00000021535
1161	NSD	4	67,004,887	67,265,351	260.465	0.0947796	0.520971	2	ENSCAFG00000027507,ENSCAFG00000021261
1162	BMD	16	50,061,835	50,322,254	260.42	0.0947796	0.520971	2	WWC2,DCTD
1163	BoT	19	23,536,946	23,797,350	260.405	0.0947796	0.520971	4	ENSCAFG00000027456,ENSCAFG00000004209,XM_540976.2,FAM168B
1164	BrS	20	24,753,080	25,013,402	260.323	0.0948956	0.520971	1	Q864F3_CANFA
1165	JRT	20	24,753,080	25,013,402	260.323	0.0948956	0.520971	1	Q864F3_CANFA
1166	Gry	4	49,654,662	49,914,894	260.233	0.0950116	0.520971
1167	Eur	37	4,302,210	4,562,428	260.219	0.0950116	0.520971	7	ENSCAFG00000009501,ENSCAFG00000022362,GLS,ENSCAFG00000023790,ENSCAFG00000023726,ENSCAFG00000023648,STAT1
1168	Gry	13	8,516,231	8,776,401	260.171	0.0951276	0.520971	5	RIMS2,TM7SF4,DPYS,LRP12,ENSCAFG00000028333
1169	Dac	6	9,300,303	9,560,403	260.101	0.0952436	0.520971	6	ENSCAFG00000023778,WBSCR28,WBSCR27,CLDN4,CLD3_CANFA,ENSCAFG00000012539
1170	GSl	11	69,677,124	69,937,223	260.1	0.0952436	0.520971	4	SUSD1,ROD1,ENSCAFG00000003019,XM_848518.1
1171	Sci	10	9,117,729	9,377,816	260.088	0.0953596	0.520971	1	AVPR1A
1172	Elk	10	9,117,729	9,377,816	260.088	0.0953596	0.520971	1	AVPR1A
1173	Bgl	22	6,875,962	7,135,931	259.97	0.0955916	0.520971	1	ENSCAFG00000028152
1174	CoS	4	57,158,117	57,417,970	259.854	0.0959397	0.520971
1175	Dob	21	28,927,356	29,187,139	259.784	0.0959397	0.520971	10	FOLR1,C11orf51,LRTOMT,C11orf59,LRRC51,NUMA1,Q3HTU6_CANFA,RNF121,ENSCAFG00000025764,XM_534024.2
1176	IrW	17	8,690,675	8,950,443	259.769	0.0959397	0.520971	2	ENSCAFG00000027133,ENSCAFG00000022046
1177	Gry	13	64,765,281	65,025,033	259.753	0.0959397	0.520971	3	XM_848064.1,COX18,ANKRD17
1178	BrS	1	70,324,364	70,584,114	259.751	0.0959397	0.520971
1179	Eur	26	11,002,211	11,261,918	259.708	0.0960557	0.520971	5	IFT81,ENSCAFG00000027198,ENSCAFG00000028087,AT2A2_CANFA,ANAPC7
1180	BoC	24	10,781,107	11,040,798	259.692	0.0962877	0.520971
1181	IrW	14	56,670,976	56,930,632	259.657	0.0962877	0.520971	1	FOXP2
1182	Elk	18	28,324,330	28,583,985	259.656	0.0964037	0.520971	16	SCGB1C1,ODF3,ENSCAFG00000006433,RIC8A,SIRT3,PSMD13,NLRP6,ATHL1,XM_843463.1,XM_540516.1,XM_540515.2,B4GALNT4,PKP3,SIGIRR,ANO9,PTDSS2
1183	Gry	23	37,878,958	38,138,610	259.653	0.0964037	0.520971	2	FAIM,PIK3CB
1184	EBD	7	17,678,101	17,937,751	259.651	0.0964037	0.520971	1	ENSCAFG00000024599
1185	Dac	12	35,735,957	35,995,602	259.646	0.0964037	0.520971	3	COL19A1,COL9A1,FAM135A
1186	IrW	10	45,243,460	45,503,048	259.589	0.0966357	0.520971	5	PDCL3,NMS,ENSCAFG00000002231,CHST10,LONRF2
1187	Sci	13	14,369,108	14,628,625	259.518	0.0967517	0.520971	1	ENSCAFG00000000747
1188	BoC	28	3,179,702	3,439,214	259.513	0.0967517	0.520971	3	XM_543895.2,MAPK8,ARHGAP22
1189	Elk	19	52,269,289	52,528,792	259.504	0.0967517	0.520971
1190	Dac	3	67,480,795	67,740,234	259.44	0.0972158	0.520971	5	FBXL5,CC2D2A,ENSCAFG00000015359,XM_536234.2,C1QTNF7
1191	BMD	3	33,725,374	33,984,799	259.426	0.0972158	0.520971	5	POLK,COL4A3BP,ENSCAFG00000021416,HMGCR,ENSCAFG00000026019
1192	GoS	1	114,712,526	114,971,921	259.396	0.0972158	0.520971	9	Q004B2_CANFA,CXCL17,Q8WMS5_CANFA,ENSCAFG00000026725,CNFN,MEGF8,TMEM145,PRR19,PAFAH1B3
1193	Eur	5	8,049,849	8,309,107	259.259	0.0975638	0.520971	1	BARX2
1194	Elk	7	75,460,594	75,719,842	259.249	0.0975638	0.520971	2	L3MBTL4,ENSCAFG00000027085
1195	Eur	2	21,792,961	22,052,186	259.226	0.0975638	0.520971	3	SLC39A12,XM_544242.2,ENSCAFG00000004508
1196	Rtw	29	17,272,074	17,531,297	259.224	0.0975638	0.520971	2	ENSCAFG00000007228,CYP7B1
1197	LRe	3	23,351,158	23,610,377	259.22	0.0975638	0.520971	1	ENSCAFG00000008360
1198	Eur	2	74,283,021	74,542,237	259.217	0.0976798	0.520971	4	MECR,SFRS4,XM_849712.1,EPB41
1199	TYo	22	39,884,175	40,143,389	259.215	0.0976798	0.520971	1	ENSCAFG00000027628
1200	IrW	31	18,366,387	18,625,577	259.191	0.0976798	0.520971	1	ENSCAFG00000008372
1201	FSp	20	10,276,617	10,535,759	259.143	0.0977958	0.520971	2	SLC6A1,SLC6A11
1202	BeT	19	15,978,678	16,237,773	259.096	0.0980278	0.520971	7	C4orf29,MFSD8,ENSCAFG00000022686,PLK4,HSPA4L,SLC25A31,INTU
1203	NFd	11	43,008,412	43,267,480	259.069	0.0980278	0.520971	2	MLLT3,ENSCAFG00000027375
1204	CoS	8	7,388,775	7,647,842	259.068	0.0980278	0.520971	14	NYNRIN,CBLN3,KHNYN,ENSCAFG00000021342,SDR39U1,ENSCAFG00000027656,XM_535262.2,CMA1_CANFA,ENSCAFG00000025404,Q9TRV7_CANFA,GZMH,GZMB,ENSCAFG00000022683,STXBP6
1205	NFd	1	106,045,835	106,304,832	258.998	0.0980278	0.520971	16	ENSCAFG00000002670,RPS9,ENSCAFG00000024425,TSEN34,MBOAT7,TMC4,LENG1,CNOT3,PRPF31,TFPT,XM_848127.1,OSCAR,ENSCAFG00000024200,TARM1,VSTM1,CACNG6
1206	Rtw	29	35,973,136	36,232,064	258.929	0.0983759	0.522387	1	ENSCAFG00000025423
1207	ESt	8	48,928,609	49,187,488	258.88	0.0984919	0.52257	2	RGS6,DPF3
1208	CoS	21	4,775,817	5,034,632	258.816	0.0987239	0.522935	1	ENSCAFG00000022278
1209	BoT	7	22,637,896	22,896,633	258.738	0.0987239	0.522935	3	NP_001003354.1,ENSCAFG00000013766,PLA2G4A
1210	StP	37	13,421,815	13,680,520	258.706	0.0990719	0.524344	5	ALS2CR12,TRAK2,ENSCAFG00000022422,STRADB,ALS2CR11
1211	ShP	13	40,219,471	40,478,061	258.591	0.099652	0.525349	12	ZC3H3,GSDMD,EEF1D,TIGD5,PYCRL,TSTA3,ENSCAFG00000023744,MAPK15,FAM83H,SCRIB,PUF60,NRBP2
1212	ESt	19	51,546,685	51,805,213	258.529	0.099768	0.525349
1213	BrS	5	66,571,130	66,829,648	258.519	0.099768	0.525349	11	XM_546767.2,ENSCAFG00000019801,GAS8,DBNDD1,DEF8,Q9N0F8_CANFA,cfa-mir-220a,MSHR_CANFA,TCF25,SPIRE2,FANCA
1214	StP	9	31,291,347	31,549,819	258.473	0.099768	0.525349	1	ENSCAFG00000022092
1215	Eur	8	23,613,269	23,871,695	258.427	0.099768	0.525349
1216	TYo	38	24,467,415	24,725,803	258.389	0.099884	0.525349	7	CD244,LY9,SLAMF7,CD48,ENSCAFG00000020847,SLAF1_CANFA,CD84
1217	Wei	1	21,308,965	21,567,262	258.298	0.1	0.525349	4	NARS,Q6JDL3_CANFA,ONECUT2,ST8SIA3
1218	FSp	1	35,997,410	36,255,685	258.276	0.1	0.525349
1219	EBD	18	5,587,296	5,845,556	258.261	0.1	0.525349
1220	EBD	1	59,645,067	59,903,284	258.218	0.100116	0.525527	2	WDR27,DSE
1221	Sci	2	4,370,410	4,628,558	258.149	0.10058	0.527098	3	CCNY,XM_843492.1,ENSCAFG00000026967
1222	LRe	3	58,383,063	58,641,206	258.144	0.10058	0.527098	4	ADAMTSL3,ENSCAFG00000027045,FAM154B,ENSCAFG00000013671
1223	LRe	11	69,975,843	70,233,927	258.085	0.100812	0.527451	4	XM_848518.1,KIAA1958,ENSCAFG00000003047,C9orf80
1224	BoC	11	7,003,769	7,261,843	258.075	0.100812	0.527451
1225	NFd	8	39,203,859	39,461,851	257.993	0.101624	0.531265	4	TMEM30B,PRKCH,ENSCAFG00000015709,ENSCAFG00000022396
1226	BoC	7	45,916,105	46,173,918	257.814	0.102088	0.533256	16	ATP8B2,AQP10,XM_537258.2,UBAP2L,ENSCAFG00000026039,C1orf43,cfa-mir-190b,TPM3,NUP210L,RPS27,XM_850035.1,JTB,CREB3L4,SLC39A1,CRTC2,DENND4B
1227	BoC	21	49,385,076	49,642,771	257.696	0.102204	0.533427	2	ENSCAFG00000001197,ENSCAFG00000021658
1228	GRe	16	4,902,887	5,160,476	257.59	0.102552	0.534256	2	EZH2,CUL1
1229	Eur	22	6,686,550	6,944,121	257.572	0.1029	0.534256	1	ENSCAFG00000025917
1230	LRe	13	39,919,155	40,176,696	257.542	0.103016	0.534256	8	LY6E,ENSCAFG00000025506,LY6H,GPIHBP1,ZNF696,RHPN1,MAFA,ZC3H3
1231	GSl	2	64,738,682	64,996,185	257.504	0.103016	0.534256	2	FTO,RPGRIP1L
1232	Dac	14	25,913,520	26,170,969	257.45	0.103016	0.534256	2	COL28A1,MIOS
1233	JRT	13	55,062,757	55,320,186	257.43	0.103016	0.534256
1234	Bgl	30	18,293,735	18,551,150	257.416	0.103132	0.534256	4	COPS2,GALK2,C15orf33,FGF7_CANFA
1235	GSh	3	62,004,113	62,261,524	257.412	0.103132	0.534256	5	ENSCAFG00000014380,ENSCAFG00000024804,ENSCAFG00000024801,SORCS2,PSAPL1
1236	Dob	16	17,838,420	18,095,766	257.347	0.103248	0.534256	15	GIMAP5,XM_848486.1,TMEM176B,ABP1,KCNH2_CANFA,NOS3_CANFA,ENSCAFG00000025508,ENSCAFG00000004693,ABCB8,ACCN3,CDK5,SLC4A2,Q6BCG5_CANFA,TMUB1,AGAP3
1237	JRT	25	7,770,306	8,027,636	257.331	0.103248	0.534256	2	ENSCAFG00000006251,NBEA
1238	BMD	1	57,140,848	57,398,153	257.306	0.103364	0.534256	5	ENSCAFG00000026487,BRAC_CANFA,ENSCAFG00000008616,ENSCAFG00000021991,SFT2D1
1239	Sci	24	7,416,403	7,673,680	257.278	0.103364	0.534256	3	DTD1,ENSCAFG00000010138,SEC23B
1240	CoS	8	64,592,702	64,849,904	257.203	0.103712	0.535094	3	TTC7B,ENSCAFG00000026676,RPS6KA5
1241	Dob	16	15,880,191	16,137,344	257.154	0.103944	0.535094	8	STRA8,LOC607081,WDR91,C7orf49,TMEM140,AGBL3,CALD1,ENSCAFG00000015396
1242	ESt	8	43,456,740	43,713,887	257.148	0.103944	0.535094	3	ENSCAFG00000016275,GPHN,XM_843597.1
1243	CoS	8	42,017,569	42,274,697	257.129	0.103944	0.535094	4	C14orf50,XM_547854.2,PLEKHG3,SPTB
1244	BoT	19	13,816,712	14,073,781	257.07	0.103944	0.535094	1	ENSCAFG00000020703
1245	BoT	7	54,138,785	54,395,665	256.881	0.104292	0.53576	1	ENSCAFG00000021035
1246	BMD	21	40,866,371	41,123,207	256.837	0.104292	0.53576	3	B3XXE8_CANFA,CRSP2_CANFA,CALCA_CANFA
1247	StP	18	25,032,224	25,289,056	256.833	0.104408	0.53576
1248	BrS	2	58,590,846	58,847,614	256.769	0.104408	0.53576	3	TNPO1,FCHO2,ENSCAFG00000023382
1249	TYo	3	26,309,064	26,565,799	256.736	0.10464	0.536521	1	EDIL3
1250	LRe	17	29,426,824	29,683,254	256.431	0.105916	0.541651	1	Q2PPL3_CANFA
1251	ESt	23	18,738,998	18,995,392	256.395	0.105916	0.541651	3	ZCWPW2,AZI2,CMC1
1252	NFd	22	56,642,716	56,899,084	256.369	0.105916	0.541651
1253	Dac	28	4,919,822	5,176,116	256.295	0.106032	0.541651	6	ENSCAFG00000006847,ANUBL1,ENSCAFG00000027580,ENSCAFG00000027491,MARCH8,ALOX5
1254	BoC	1	50,700,298	50,956,588	256.291	0.106148	0.541651	3	GTF2H5,TULP4,ENSCAFG00000028188
1255	Sci	18	32,992,399	33,248,671	256.273	0.106148	0.541651	1	ENSCAFG00000027991
1256	TYo	24	34,732,036	34,988,236	256.201	0.106961	0.543519	6	GDAP1L1,FITM2,R3HDML,HNF4A,TTPAL,SERINC3
1257	FSp	17	31,908,074	32,164,262	256.189	0.106961	0.543519	3	CRIM1,ENSCAFG00000020895,FEZ2
1258	GoS	18	4,980,153	5,236,329	256.177	0.107077	0.543519	1	COBL
1259	Sci	19	9,374,835	9,630,978	256.144	0.107077	0.543519
1260	GSh	5	48,988,920	49,245,046	256.127	0.107077	0.543519	2	ROR1,ENSCAFG00000027327
1261	BeT	3	39,112,556	39,368,647	256.092	0.107193	0.543519	3	NDN,ENSCAFG00000010136,ENSCAFG00000010141
1262	TYo	3	39,112,556	39,368,647	256.092	0.107193	0.543519	3	NDN,ENSCAFG00000010136,ENSCAFG00000010141
1263	NFd	25	4,828,638	5,084,716	256.079	0.107193	0.543519	4	NHLRC3,C13orf23,ENSCAFG00000022279,STOML3
1264	FSp	11	26,266,110	26,522,158	256.049	0.107425	0.543834	2	H2AFY,TIFAB
1265	Dob	3	84,830,491	85,086,506	256.016	0.107425	0.543834
1266	JRT	8	58,638,100	58,894,076	255.977	0.107889	0.545047
1267	GoS	37	14,346,459	14,602,407	255.949	0.108005	0.545047	3	BMPR2,ENSCAFG00000026714,FAM117B
1268	Dac	18	8,637,346	8,893,245	255.9	0.108005	0.545047	1	ENSCAFG00000022264
1269	ESt	10	52,415,430	52,671,288	255.859	0.108005	0.545047	4	C2orf61,CALM2,EPCAM,Q5SBJ2_CANFA
1270	EBD	16	26,313,805	26,569,646	255.842	0.108237	0.545513	6	IKBKB,PLAT,AP3M2,ENSCAFG00000005591,MYST3,ENSCAFG00000028038
1271	ESt	1	49,355,493	49,611,254	255.762	0.108353	0.545513	1	ENSCAFG00000023184
1272	BoC	5	59,900,123	60,155,859	255.737	0.108353	0.545513	7	CALML6,ENSCAFG00000019211,ENSCAFG00000023221,C1orf222,GABRD,PRKCZ,SKI
1273	Wei	29	6,600,700	6,856,357	255.658	0.108585	0.545823	1	PCMTD1
1274	GSl	6	49,951,873	50,207,512	255.64	0.108585	0.545823	1	RNPC3
1275	CoS	15	27,299,695	27,555,272	255.578	0.108933	0.546714	2	CCDC59,C12orf26
1276	Eur	8	25,957,776	26,213,352	255.577	0.108933	0.546714	1	ENSCAFG00000026412
1277	Dac	X	106,381,235	106,636,562	255.328	0.109281	0.546747	3	MBNL3,ENSCAFG00000022191,HS6ST2
1278	Bgl	14	41,227,068	41,482,340	255.273	0.109281	0.546747	2	DFNA5,OSBPL3
1279	GSl	4	36,010,758	36,266,029	255.272	0.109281	0.546747
1280	Gry	5	28,000,821	28,256,023	255.203	0.109281	0.546747	1	XM_536589.2
1281	NSD	25	37,121,314	37,376,488	255.175	0.109397	0.5469	5	LOXL2,R3HCC1,CHMP7,RHOBTB2,PEBP4
1282	Rtw	12	64,594,602	64,849,687	255.086	0.109977	0.54937
1283	NSD	25	40,226,286	40,481,305	255.02	0.110325	0.550679	2	ENSCAFG00000021935,FBXO25
1284	BrS	11	23,665,422	23,920,402	254.981	0.110557	0.551407	5	SLC22A5,IRF1,IL5_CANFA,RAD50,ENSCAFG00000000877
1285	GRe	4	69,412,166	69,667,115	254.95	0.110905	0.551739	4	ENSCAFG00000028090,NNT,ENSCAFG00000020799,PAIP1
1286	Gry	3	28,104,821	28,359,706	254.886	0.110905	0.551739	2	ATG10,ENSCAFG00000024012
1287	StP	16	12,915,294	13,170,158	254.865	0.110905	0.551739	5	ENSCAFG00000021706,SVOPL,ENSCAFG00000004327,XM_847054.1,ENSCAFG00000024314
1288	ESt	20	16,445,842	16,700,684	254.843	0.111021	0.551739	1	LRRN1
1289	BrS	24	21,856,681	22,111,492	254.812	0.111253	0.551739	4	STK35,ENSCAFG00000027061,PDYN,XM_846710.1
1290	BeT	15	38,674,144	38,928,935	254.792	0.111369	0.551739	7	SNRPF,CCDC38,ENSCAFG00000006403,AMDHD1,HAL,LTA4H,ENSCAFG00000006452
1291	JRT	10	8,862,961	9,117,729	254.769	0.111369	0.551739	1	PPM1H
1292	StP	9	17,220,618	17,475,371	254.754	0.111485	0.551739	3	APOH_CANFA,CCDC46,ENSCAFG00000027516
1293	StP	27	5,352,555	5,607,238	254.684	0.111485	0.551739	8	KRT77,K2C1_CANFA,KRT73,KRT72,KRT74,KRT71,KRT5,XM_854800.1
1294	NFd	19	6,931,631	7,186,306	254.676	0.111485	0.551739	1	ENSCAFG00000021596
1295	FSp	10	8,399,169	8,653,746	254.578	0.111717	0.552034	2	USP15,MON2
1296	BoT	7	38,488,445	38,742,998	254.554	0.111717	0.552034	2	C1orf101,PPPDE1
1297	IrW	13	16,053,832	16,308,332	254.501	0.112065	0.553326	2	CSMD3,ENSCAFG00000025884
1298	ShP	1	101,854,168	102,108,647	254.48	0.112181	0.553472	9	IPPK,XM_533561.2,ECM2,ENSCAFG00000024350,ASPN,OMD,OGN,ENSCAFG00000022245,NOL8
1299	GSh	3	60,275,491	60,529,664	254.174	0.113225	0.558193	2	BCL2A1,MTHFS
1300	Eur	30	27,821,162	28,074,978	253.817	0.113689	0.559189
1301	LRe	36	22,218,365	22,472,165	253.801	0.113689	0.559189	1	ENSCAFG00000020851
1302	GSh	36	22,218,365	22,472,165	253.801	0.113689	0.559189	1	ENSCAFG00000020851
1303	Dac	5	81,427,721	81,681,395	253.675	0.113921	0.5599	1	ATBF1
1304	BMD	2	68,140,245	68,393,886	253.642	0.114153	0.560311	2	ENSCAFG00000009226,ENSCAFG00000023585
1305	BoC	6	14,236,518	14,490,107	253.59	0.114501	0.560311	7	XM_546988.2,XM_536878.2,ENSCAFG00000015477,PMS2,AIMP2,EIF2AK1,ANKRD61
1306	JRT	5	48,920,589	49,174,135	253.547	0.114501	0.560311	3	XM_536683.2,ROR1,ENSCAFG00000027327
1307	ESt	14	40,347,956	40,601,429	253.474	0.114617	0.560311	1	STK31
1308	Sci	30	24,244,363	24,497,824	253.462	0.114617	0.560311	2	RFX7,ENSCAFG00000016036
1309	GoS	12	66,598,448	66,851,897	253.45	0.114617	0.560311	2	ATG5,ENSCAFG00000025900
1310	GSh	3	76,280,705	76,534,139	253.435	0.114617	0.560311	6	FAM114A1,cfa-mir-574,B2CW37_CANFA,B2CW35_CANFA,TLR10,KLF3
1311	ShP	13	20,780,848	21,034,089	253.242	0.114849	0.561017	1	SAMD12
1312	BoC	17	30,429,369	30,682,379	253.011	0.116009	0.566251
1313	ESt	24	11,388,903	11,641,902	253	0.116125	0.566386
1314	BoT	2	77,583,528	77,836,332	252.805	0.116705	0.567587	2	Q5XTY6_CANFA,CLIC4
1315	NFd	20	29,982,961	30,235,693	252.733	0.116937	0.567587	3	PRICKLE2,PSMD6,ATXN7
1316	Gry	18	30,287,107	30,539,746	252.64	0.117053	0.567587
1317	IrW	14	46,519,043	46,771,644	252.602	0.117053	0.567587	4	FAM188B,AQP1_CANFA,GHRHR,ADCYAP1R1
1318	GoS	1	97,615,049	97,867,626	252.578	0.117169	0.567587	1	ENSCAFG00000002155
1319	JRT	1	97,615,049	97,867,626	252.578	0.117169	0.567587	1	ENSCAFG00000002155
1320	NSD	9	40,877,332	41,129,838	252.507	0.117169	0.567587	7	HEATR6,CCL4_CANFA,CCL3_CANFA,ENSCAFG00000023350,ENSCAFG00000023266,CCL14,CCL16
1321	GSh	19	36,430,069	36,682,416	252.348	0.117169	0.567587	2	DPP10,ENSCAFG00000022144
1322	Rtw	19	38,031,420	38,283,759	252.34	0.117169	0.567587	2	Q9GL78_CANFA,SLC35F5
1323	BoC	6	50,434,290	50,686,527	252.238	0.117285	0.56772	1	COL11A1
1324	FSp	22	25,198,371	25,450,415	252.045	0.117633	0.568974
1325	Wei	27	46,937,382	47,189,369	251.988	0.117865	0.569666	5	XM_534930.2,DCP1B,ENSCAFG00000015998,XM_543884.2,XM_849190.1
1326	BrS	5	33,995,804	34,247,685	251.882	0.118445	0.572038	1	WSCD1
1327	BrS	5	34,306,753	34,558,314	251.562	0.11949	0.57665	9	XM_846764.1,DHX33,C1QBP,RPAIN,NUP88,RABEP1,ENO3,ENSCAFG00000027830,C17orf87
1328	Sci	6	3,728,817	3,980,304	251.488	0.119954	0.578018	6	XM_843392.1,BGLR_CANFA,ENSCAFG00000010200,XM_536832.2,CRCP,TPST1
1329	BoC	6	3,728,817	3,980,304	251.488	0.119954	0.578018	6	XM_843392.1,BGLR_CANFA,ENSCAFG00000010200,XM_536832.2,CRCP,TPST1
1330	BMD	6	57,184,384	57,435,775	251.392	0.120302	0.579259	2	TMEM56,ALG14
1331	Rtw	30	33,518,987	33,770,189	251.203	0.121462	0.584085	11	DIS3L,TIPIN,ENSCAFG00000027497,Q1HG71_CANFA,SNAPC5,RL4_CANFA,ENSCAFG00000026338,ENSCAFG00000021100,ENSCAFG00000021640,ENSCAFG00000026101,ZWILCH
1332	IrW	30	42,356,835	42,607,925	251.091	0.121578	0.584085	1	SCAPER
1333	BoC	1	26,804,484	27,055,561	251.078	0.121578	0.584085	4	MEX3C,Q6JDJ5_CANFA,ELAC1,ME2
1334	BeT	2	70,110,325	70,361,260	250.936	0.12239	0.587545	2	PHKB,ENSCAFG00000021449
1335	BeT	4	26,993,168	27,244,031	250.864	0.122738	0.588241	8	XM_847232.1,DNAJC9,TTC18,ANXA7,ENSCAFG00000021204,ZMYND17,PPP3CB,USP54
1336	Dob	7	63,214,014	63,464,832	250.819	0.122854	0.588241	1	ENSCAFG00000028394
1337	GRe	17	28,730,430	28,981,219	250.79	0.12297	0.588241	2	BIRC6,TTC27
1338	GRe	23	37,333,113	37,583,898	250.786	0.12297	0.588241	7	DZIP1L,A4GNT,ENSCAFG00000024361,DBR1,ARMC8,ENSCAFG00000026686,TXNDC6
1339	NSD	X	110,540,522	110,791,284	250.763	0.123086	0.588241	1	ENSCAFG00000018975
1340	StP	16	3,844,835	4,095,574	250.74	0.123086	0.588241	3	IGFBP3,IGFBP1,ADCY1
1341	Gry	8	45,455,380	45,706,053	250.674	0.123318	0.58891	2	XM_536638.2,ZFP36L1
1342	CoS	1	101,971,091	102,221,620	250.53	0.123666	0.58992	9	ENSCAFG00000024350,ASPN,OMD,OGN,ENSCAFG00000022245,NOL8,ENSCAFG00000028066,IARS,ENSCAFG00000002343
1343	CoS	8	36,922,151	37,172,640	250.49	0.123898	0.58992	1	DACT1
1344	GRe	5	60,140,618	60,391,081	250.464	0.123898	0.58992	7	SKI,MORN1,RER1,PEX10,PLCH2,PANK4,HES5
1345	LRe	11	43,419,908	43,670,362	250.455	0.123898	0.58992	2	KIAA1797,PTPLAD2
1346	BMD	33	18,463,518	18,713,848	250.331	0.124478	0.592242
1347	BoT	X	109,993,478	110,243,754	250.277	0.12471	0.592905	6	ENSCAFG00000027466,ENSCAFG00000022673,ENSCAFG00000024096,CD40L_CANFA,ARHGEF6,ENSCAFG00000018962
1348	BrS	31	35,527,893	35,777,959	250.067	0.12529	0.59522	1	ERG
1349	Elk	9	25,327,939	25,577,947	250.009	0.125406	0.59533	8	KRT222,LOC612467,CCR7,TNS4,IGFBP4,TOP2A,ENSCAFG00000024324,GJD3
1350	JRT	4	69,042,949	69,292,889	249.941	0.125638	0.595548	2	FGF10,ENSCAFG00000027305
1351	FSp	15	3,212,927	3,462,725	249.799	0.125638	0.595548	5	ENSCAFG00000002484,Q70Z67_CANFA,XM_539551.2,XM_539552.1,XM_539553.2
1352	FSp	X	23,659,356	23,909,058	249.703	0.125986	0.596315
1353	BoC	15	53,238,031	53,487,725	249.695	0.125986	0.596315	3	FBXW7,ENSCAFG00000021451,ENSCAFG00000008160
1354	NSD	14	61,153,113	61,401,930	248.818	0.128654	0.607596
1355	GoS	1	10,701,703	10,950,506	248.804	0.128654	0.607596
1356	Wei	11	47,941,909	48,190,690	248.782	0.128654	0.607596	3	C9orf82,PLAA,IFT74
1357	BMD	3	58,293,204	58,541,916	248.713	0.128886	0.607795	1	ADAMTSL3
1358	Rtw	10	50,295,069	50,543,709	248.641	0.129002	0.607795	4	C2orf34,ENSCAFG00000026448,SIX3,SIX2
1359	IrW	29	29,054,457	29,302,939	248.483	0.12935	0.607795	3	ENSCAFG00000008346,ENSCAFG00000026395,PKIA
1360	GSl	X	18,419,634	18,668,104	248.471	0.129582	0.607795	2	ENSCAFG00000013338,ENSCAFG00000023747
1361	GoS	4	28,046,123	28,294,567	248.445	0.129698	0.607795	3	ADK,ENSCAFG00000025923,ENSCAFG00000026251
1362	TYo	13	11,542,152	11,790,465	248.314	0.129814	0.607795	1	RSPO2
1363	JRT	29	18,565,908	18,814,171	248.264	0.12993	0.607795	2	DNAJC5B,TRIM55
1364	Bgl	12	42,658,958	42,907,187	248.23	0.12993	0.607795	2	IRAK1BP1,PHIP
1365	Dac	12	42,658,958	42,907,187	248.23	0.12993	0.607795	2	IRAK1BP1,PHIP
1366	Bgl	21	13,273,836	13,521,999	248.164	0.12993	0.607795	7	ENSCAFG00000004330,ENSCAFG00000024962,ENSCAFG00000026946,XM_542258.1,XM_542261.2,XM_533980.2,ENSCAFG00000028413
1367	EBD	7	6,026,945	6,275,062	248.118	0.12993	0.607795
1368	BrS	4	76,701,713	76,949,825	248.113	0.12993	0.607795	1	RAI14
1369	BMD	3	48,387,997	48,636,076	248.08	0.12993	0.607795
1370	EBD	16	29,883,777	30,131,631	247.855	0.130858	0.611243	5	FGFR1,LETM2,ENSCAFG00000028216,WHSC1L1,ENSCAFG00000027806
1371	BMD	1	91,262,794	91,510,618	247.825	0.130858	0.611243	3	ENSCAFG00000013130,A6Q0K4_CANFA,PIP5K1B
1372	EBD	7	37,351,557	37,599,319	247.763	0.13109	0.611881	1	SDCCAG8
1373	Gry	6	60,327,262	60,575,002	247.741	0.131206	0.611976	3	CDC7,ENSCAFG00000020183,ENSCAFG00000020187
1374	JRT	20	45,154,941	45,402,481	247.541	0.131787	0.613346	7	LRRC2,RTP3,Q2LC20_CANFA,CCRL2,CCR5_CANFA,CCR2,CCR3_CANFA
1375	BoT	1	50,528,808	50,776,268	247.461	0.131787	0.613346	3	SYNJ2,SERAC1,GTF2H5
1376	Dac	5	82,980,875	83,228,334	247.46	0.131787	0.613346	6	XM_848524.1,NFAT5,ENSCAFG00000027882,ENSCAFG00000020262,XM_846121.1,ENSCAFG00000025660
1377	Bgl	9	17,110,487	17,357,886	247.4	0.132019	0.613979	2	APOH_CANFA,CCDC46
1378	GoS	17	10,312,964	10,560,214	247.251	0.132715	0.615966	5	HPCAL1,ODC1,ENSCAFG00000021068,NOL10,ENSCAFG00000026311
1379	StP	16	12,626,664	12,873,886	247.223	0.132715	0.615966	4	ZC3HAV1L,KIAA1549,TMEM213,ATP6V0A4
1380	Dob	4	45,356,758	45,603,843	247.086	0.132831	0.615966	3	DOCK2,CCDC99,ENSCAFG00000017000
1381	GoS	20	57,921,256	58,168,199	246.944	0.132831	0.615966	11	FEM1A,cfa-mir-7-3,DPP9,ENSCAFG00000022237,C19orf10,TNFAIP8L1,SEMA6B,LRG1,PLIN5,PLIN4,XM_542154.2
1382	FSp	9	4,865,944	5,112,797	246.854	0.133063	0.616596	1	ENPP7
1383	Wei	29	4,717,461	4,964,263	246.803	0.133179	0.616687
1384	CoS	27	6,281,454	6,528,199	246.746	0.133411	0.61696	3	SCN8A,Q9GK56_CANFA,GALNT6
1385	Bgl	6	33,952,280	34,198,956	246.677	0.133527	0.61696	5	GSPT1,XM_536972.2,ZC3H7A,TXNDC11,SNN
1386	JRT	1	114,663,996	114,910,656	246.661	0.133527	0.61696	6	CEACAM4,Q004B2_CANFA,CXCL17,Q8WMS5_CANFA,ENSCAFG00000026725,CNFN
1387	BMD	21	32,476,068	32,722,597	246.53	0.134223	0.617278	13	XM_542436.2,XM_542438.2,XM_542439.2,OR56A1,UBC,XM_848481.1,XM_848487.1,XM_542442.1,XM_848496.1,XM_542444.2,XM_848507.1,XM_848519.1,OR52W1
1388	IrW	11	5,848,248	6,094,766	246.519	0.134223	0.617278	6	XM_538571.1,RPA3,ENSCAFG00000000254,CLK4,ENSCAFG00000028435,ENSCAFG00000025314
1389	LRe	12	31,314,349	31,560,773	246.425	0.134455	0.617278	2	ENSCAFG00000028040,ENSCAFG00000002503
1390	Sci	24	20,591,622	20,837,991	246.37	0.134687	0.617278	6	ENSCAFG00000006197,HSPA12B,SIGLEC1,ADAM33,GFRA4,ATRN
1391	Wei	5	80,796,344	81,042,705	246.362	0.134803	0.617278	4	HPT_CANFA,TXNL4B,DHX38,PMFBP1
1392	Rtw	12	5,972,499	6,218,850	246.352	0.134803	0.617278	4	ITPR3,IP6K3,LEMD2,MOTI_CANFA
1393	BoT	5	45,935,460	46,181,807	246.348	0.134803	0.617278	3	XM_545523.2,XM_536672.2,SERBP1
1394	Elk	9	30,050,606	30,296,922	246.317	0.134803	0.617278	4	TOB1,XM_846665.1,SPAG9,ENSCAFG00000026442
1395	LRe	4	9,414,177	9,660,456	246.28	0.135151	0.617278	1	PCNXL2
1396	BeT	4	21,810,974	22,057,232	246.259	0.135151	0.617278	2	ENSCAFG00000024412,ENSCAFG00000013277
1397	BMD	1	43,444,197	43,690,448	246.252	0.135151	0.617278	8	KATNA1,NP_001019806.1,NUP43,PCMT1,LRP11,RAET1E,ENSCAFG00000000399,ENSCAFG00000028377
1398	Sci	13	43,513,061	43,759,234	246.174	0.135267	0.617278
1399	GRe	19	4,266,547	4,512,706	246.16	0.135383	0.617278	1	Q6SL83_CANFA
1400	Gry	6	20,988,801	21,234,939	246.139	0.135499	0.617278	19	TMEM219,TAOK2,HIRIP3,INO80E,DOC2A,C16orf92,FAM57B,Q28244_CANFA,PPP4C,TBX6,YPEL3,GDPD3,XP_854283.1,CORO1A,XM_844690.1,XM_844501.1,ST1A1_CANFA,CCDC101,NUPR1
1401	Elk	11	35,072,830	35,318,966	246.137	0.135499	0.617278	2	ENSCAFG00000021994,ENSCAFG00000001473
1402	BeT	17	63,628,420	63,874,526	246.107	0.135499	0.617278	13	PSMB4,ENSCAFG00000028291,CING_CANFA,TUFT1,ENSCAFG00000027572,SNX27,ENSCAFG00000027749,TNRC4,C1orf230,ENSCAFG00000012830,MRPL9,OAZ3,TDRKH
1403	Bgl	1	55,806,706	56,052,747	246.042	0.135615	0.617278	1	ENSCAFG00000000776
1404	FSp	34	37,285,361	37,531,388	246.028	0.135731	0.617278	10	ENSCAFG00000027047,ENSCAFG00000021239,XM_545273.2,MYNN,LRRC34,LRRIQ4,LRRC31,XM_846615.1,ENSCAFG00000014751,SAMD7
1405	Gry	5	25,537,005	25,783,030	246.026	0.135731	0.617278	3	ENSCAFG00000022149,RDX,ZC3H12C
1406	GRe	13	62,989,535	63,235,475	245.941	0.135963	0.617278	6	RUFY3,GRSF1,ENSCAFG00000026082,MOBKL1A,DCK,ENSCAFG00000002934
1407	StP	9	44,927,746	45,173,685	245.94	0.135963	0.617278	2	ENSCAFG00000018592,XM_848439.1
1408	Gry	31	26,620,036	26,865,884	245.849	0.136195	0.617278	1	ENSCAFG00000027534
1409	BeT	3	54,521,549	54,767,312	245.764	0.136427	0.617278	5	MRPL46,MRPS11,DET1,AEN,ISG20
1410	BMD	1	93,195,686	93,441,425	245.74	0.136427	0.617278
1411	BMD	1	102,740,993	102,986,732	245.74	0.136427	0.617278	8	XM_541340.2,ZNF274,ENSCAFG00000028331,XM_848460.1,ZSCAN18,ZNF135,ENSCAFG00000008539,ENSCAFG00000023344
1412	CoS	1	102,740,993	102,986,732	245.74	0.136427	0.617278	8	XM_541340.2,ZNF274,ENSCAFG00000028331,XM_848460.1,ZSCAN18,ZNF135,ENSCAFG00000008539,ENSCAFG00000023344
1413	BeT	6	38,197,757	38,443,390	245.634	0.136659	0.617278
1414	Elk	28	35,222,047	35,467,679	245.633	0.136659	0.617278	4	DMBT1,C10orf120,ENSCAFG00000024245,CUZD1
1415	IrW	24	20,025,795	20,271,415	245.621	0.136775	0.617278	2	ADRA1D,SMOX
1416	EBD	20	32,251,006	32,496,588	245.583	0.137007	0.617278	1	ENSCAFG00000007181
1417	StP	9	16,792,735	17,038,287	245.553	0.137007	0.617278	2	ENSCAFG00000011326,ENSCAFG00000023614
1418	ShP	10	20,809,193	21,054,725	245.533	0.137007	0.617278
1419	NSD	2	30,335,803	30,581,306	245.504	0.137239	0.617278	1	ENSCAFG00000022557
1420	GSh	19	35,935,817	36,181,314	245.498	0.137239	0.617278	1	ENSCAFG00000027301
1421	EBD	18	46,506,953	46,752,427	245.475	0.137239	0.617278	7	PHF21A,GYLTL1B,PEX16,C11orf94,MAPK8IP1,CRY2,Q8WMR8_CANFA
1422	JRT	6	11,497,039	11,742,507	245.469	0.137239	0.617278	10	RABL5,XM_536854.2,CLDN15,ZNHIT1,PLOD3,MOGAT3,C7orf52,VGF,AP1S1,Q6R745_CANFA
1423	IrW	22	32,845,102	33,090,496	245.395	0.137355	0.617278
1424	GSl	3	25,263,247	25,508,635	245.389	0.137355	0.617278	2	ENSCAFG00000025939,ENSCAFG00000008427
1425	Wei	X	37,698,011	37,943,378	245.368	0.137355	0.617278	4	AOFB_CANFA,ENSCAFG00000027448,ENSCAFG00000021025,NDP
1426	JRT	3	36,509,190	36,754,360	245.171	0.138051	0.619971	2	GABRA5,ENSCAFG00000027511
1427	GSl	14	16,040,225	16,285,367	245.143	0.138167	0.620057	2	KIAA1324L,DMTF1
1428	Eur	11	13,259,038	13,504,153	245.116	0.138399	0.620663	1	ENSCAFG00000024866
1429	TYo	15	37,881,646	38,126,525	244.88	0.139559	0.624636	3	NDUFA12,NR2C1,FGD6
1430	Gry	8	54,135,370	54,380,239	244.87	0.139675	0.624636
1431	IrW	10	5,035,631	5,280,491	244.861	0.139675	0.624636
1432	FSp	22	5,950,731	6,195,579	244.849	0.139675	0.624636	3	RCBTB2,Q9N122_CANFA,ITM2B
1433	JRT	23	41,105,590	41,350,374	244.785	0.139907	0.625237	4	XRN1,ATR,ENSCAFG00000007877,XM_534907.2
1434	LRe	5	66,664,263	66,909,003	244.741	0.140139	0.625483	14	DEF8,Q9N0F8_CANFA,cfa-mir-220a,MSHR_CANFA,TCF25,SPIRE2,FANCA,ZNF276,C16orf7,SPATA2L,CDK10,C16orf55,XM_546776.2,DPEP1
1435	GoS	33	31,589,655	31,834,392	244.738	0.140255	0.625483	7	OSBPL11,LMLN,ENSCAFG00000012721,ENSCAFG00000027127,RPL35A,IQCG,LRCH3
1436	Eur	X	74,350,886	74,595,613	244.728	0.140255	0.625483	2	XP_851523.1,ENSCAFG00000027125
1437	Elk	8	34,076,073	34,320,783	244.711	0.140603	0.625809	3	ENSCAFG00000015040,KIAA0831,TBPL2
1438	GSl	14	51,563,259	51,807,905	244.647	0.140719	0.625809	1	RPS21
1439	Rtw	11	57,950,406	58,195,009	244.604	0.140719	0.625809	4	TSTD2,NCBP1,XPA,FOXE1
1440	FSp	15	18,220,866	18,465,464	244.599	0.140719	0.625809	5	ZSWIM5,UROD,HECTD3,EIF2B3,ENSCAFG00000004686
1441	NSD	2	40,760,466	41,005,019	244.554	0.141183	0.626744	2	ARHGAP26,Q3HTT7_CANFA
1442	FSp	26	12,438,210	12,682,723	244.514	0.141299	0.626744	7	MAPKAPK5,ENSCAFG00000015330,XM_534679.2,TMEM116,ENSCAFG00000020848,ERP29,NAA25
1443	ESt	13	64,814,045	65,058,534	244.49	0.141531	0.626744	2	COX18,ANKRD17
1444	GSl	11	68,323,083	68,567,564	244.482	0.141531	0.626744	2	SVEP1,ENSCAFG00000027624
1445	ESt	3	72,596,815	72,841,282	244.468	0.141531	0.626744	2	NSG1,STX18
1446	BrS	4	65,307,954	65,552,382	244.429	0.141995	0.626744	5	MOCS2,ITGA2,ENSCAFG00000008920,ENSCAFG00000018434,ITGA1
1447	StP	31	36,364,077	36,608,499	244.423	0.141995	0.626744	6	BRWD1,ENSCAFG00000028076,XM_844714.1,WRB,LCA5L,SH3BGR
1448	Gry	14	58,700,243	58,944,647	244.405	0.142111	0.626744	3	ENSCAFG00000021975,CAZA2_CANFA,A0M8V1_CANFA
1449	GoS	5	65,732,067	65,976,465	244.399	0.142111	0.626744	5	SLC25A33,TMEM201,PIK3CD,CLSTN1,ENSCAFG00000027480
1450	LRe	29	37,368,131	37,612,484	244.354	0.142227	0.626744	1	ENSCAFG00000022608
1451	Eur	9	25,465,743	25,710,036	244.294	0.142343	0.626744	10	TNS4,IGFBP4,TOP2A,ENSCAFG00000024324,GJD3,RARA_CANFA,ENSCAFG00000024775,CDC6,ENSCAFG00000021582,WIPF2
1452	GRe	12	42,248,585	42,492,714	244.13	0.142575	0.626744	3	ENSCAFG00000002790,ENSCAFG00000028070,ENSCAFG00000023918
1453	Dob	17	45,930,548	46,174,661	244.114	0.142575	0.626744	1	ENSCAFG00000000288
1454	LRe	1	113,389,160	113,633,235	244.076	0.142575	0.626744	15	CLPTM1,APOC2,APOC4,APOC1_CANFA,APOE_CANFA,TOMM40,Q8HYT4_CANFA,BCAM,CBLC,BCL3,CEACAM16,CEACAM19,ENSCAFG00000027965,PVR,ENSCAFG00000004668
1455	NFd	6	43,803,989	44,048,043	244.055	0.142691	0.626744	4	CHIA,DENND2D,CEPT1,DRAM2
1456	Gry	1	96,217,628	96,461,676	244.049	0.142691	0.626744	7	RCL1,ENSCAFG00000027229,cfa-mir-101-2,ENSCAFG00000021196,ENSCAFG00000023391,ENSCAFG00000027926,JAK2
1457	BeT	1	96,217,628	96,461,676	244.049	0.142691	0.626744	7	RCL1,ENSCAFG00000027229,cfa-mir-101-2,ENSCAFG00000021196,ENSCAFG00000023391,ENSCAFG00000027926,JAK2
1458	BeT	4	31,050,017	31,294,063	244.047	0.142691	0.626744	4	POLR3A,XM_859408.1,ENSCAFG00000022005,ENSCAFG00000026048
1459	BMD	28	5,160,923	5,404,915	243.993	0.143039	0.627842	6	MARCH8,ALOX5,OR13A1,ENSCAFG00000006982,ENSCAFG00000025096,ENSCAFG00000025080
1460	EBD	8	4,430,018	4,673,900	243.883	0.143271	0.628078	1	SLC24A4
1461	BMD	1	120,040,159	120,283,996	243.838	0.143387	0.628078	13	ATP4A_CANFA,ENSCAFG00000007020,DMKN,KTDAP_CANFA,FFAR2,XM_850391.1,FFAR1,CD22,MAG,HEPC_CANFA,USF2,LSR,FAM187B
1462	EBD	6	49,897,116	50,140,939	243.824	0.143387	0.628078	1	RNPC3
1463	LRe	28	27,931,693	28,175,480	243.788	0.143503	0.628157	5	ENSCAFG00000027818,C10orf118,TDRD1,VWA2,AFAP1L2
1464	LRe	3	70,746,883	70,990,639	243.757	0.143619	0.628235
1465	Wei	1	94,125,361	94,369,001	243.641	0.144084	0.628862	1	Q6H100_CANFA
1466	ESt	15	32,049,363	32,292,996	243.634	0.144084	0.628862	3	C12orf50,C12orf29,CEP290
1467	BoT	19	50,267,950	50,511,565	243.616	0.144084	0.628862
1468	NFd	8	50,479,789	50,723,359	243.571	0.144316	0.628862	7	VSX2,ABCD4,C14orf115,TMEM90A,NPC2_CANFA,ISCA2,LTBP2
1469	BoC	38	22,248,250	22,491,814	243.565	0.144316	0.628862
1470	BMD	9	37,895,840	38,139,354	243.515	0.144548	0.628862	4	ENSCAFG00000028247,MED13,INTS2,BRIP1
1471	LRe	22	45,652,679	45,896,190	243.512	0.144548	0.628862	2	GPC5,ENSCAFG00000024357
1472	BoT	19	18,919,186	19,162,689	243.504	0.144548	0.628862
1473	BeT	16	54,755,132	54,998,536	243.405	0.145244	0.630605
1474	Gry	5	5,291,944	5,535,341	243.398	0.145244	0.630605	2	SF3A1,ENSCAFG00000023789
1475	ESt	16	26,900,922	27,144,281	243.36	0.145244	0.630605	7	ANK1,ENSCAFG00000026572,NKX6-3,ENSCAFG00000025629,AGPAT6,GINS4,GOLGA7
1476	Rtw	15	48,564,267	48,807,587	243.321	0.14536	0.630681	1	ENSCAFG00000021379
1477	Dob	13	15,114,335	15,357,590	243.256	0.145592	0.630833
1478	ShP	12	40,624,450	40,867,681	243.232	0.145592	0.630833	1	ENSCAFG00000002777
1479	Dac	8	51,250,744	51,493,907	243.164	0.14594	0.631712	5	NEK9,TMED10,XM_547913.2,FOS,ENSCAFG00000026193
1480	Elk	18	3,028,416	3,271,564	243.149	0.146172	0.631712	3	SUNC1,C7orf57,ABCA13
1481	GSh	21	12,328,092	12,571,208	243.117	0.146288	0.631712
1482	EBD	13	19,237,875	19,480,977	243.103	0.146288	0.631712	2	UTP23,RAD21
1483	Rtw	36	3,009,126	3,252,213	243.088	0.146288	0.631712
1484	Gry	1	55,951,882	56,194,812	242.931	0.147332	0.635297	1	ENSCAFG00000000776
1485	LRe	5	81,481,856	81,724,690	242.835	0.147796	0.635297	1	ATBF1
1486	GRe	2	37,480,843	37,723,582	242.74	0.147796	0.635297	10	PAIP2,A8CX01_CANFA,ENSCAFG00000005693,ENSCAFG00000024193,SPATA24,DNAJC18,ENSCAFG00000023602,ENSCAFG00000024585,TMEM173,UBE2D2
1487	Gry	20	21,471,239	21,713,957	242.719	0.147796	0.635297
1488	Sci	11	27,003,230	27,245,906	242.677	0.147796	0.635297	2	ENSCAFG00000001094,TRPC7
1489	NFd	29	19,945,655	20,188,312	242.658	0.147796	0.635297	3	CPA6,ENSCAFG00000007570,ENSCAFG00000007577
1490	BMD	21	29,657,772	29,900,394	242.623	0.147912	0.635297	13	XM_542338.2,OR52M1,ENSCAFG00000024034,XM_847116.1,OR52B4,ENSCAFG00000006014,ENSCAFG00000006016,TRIM21,XM_542345.2,XM_542346.2,XM_542347.2,cOR52K6,XM_542349.1
1491	Elk	14	56,318,097	56,560,718	242.622	0.147912	0.635297	1	ENSCAFG00000027682
1492	GSh	15	39,492,981	39,735,471	242.491	0.148376	0.636438	1	NEDD1
1493	GSl	4	82,605,187	82,847,632	242.446	0.148608	0.636438
1494	BoT	15	27,144,555	27,386,999	242.445	0.148608	0.636438	2	CCDC59,C12orf26
1495	BoT	5	66,465,953	66,708,382	242.43	0.148724	0.636438	10	KIF1B,XM_546767.2,ENSCAFG00000019801,GAS8,DBNDD1,DEF8,Q9N0F8_CANFA,cfa-mir-220a,MSHR_CANFA,TCF25
1496	Dob	16	6,454,150	6,696,510	242.361	0.149072	0.636438
1497	EBD	X	105,274,087	105,516,440	242.354	0.149072	0.636438	6	ARHGAP36,ENSCAFG00000022172,OR11A1,IGSF1,ENSCAFG00000023200,ENSCAFG00000023198
1498	Eur	X	105,274,087	105,516,440	242.354	0.149072	0.636438	6	ARHGAP36,ENSCAFG00000022172,OR11A1,IGSF1,ENSCAFG00000023200,ENSCAFG00000023198
1499	BMD	X	105,274,087	105,516,440	242.354	0.149072	0.636438	6	ARHGAP36,ENSCAFG00000022172,OR11A1,IGSF1,ENSCAFG00000023200,ENSCAFG00000023198
1500	GRe	X	105,274,087	105,516,440	242.354	0.149072	0.636438	6	ARHGAP36,ENSCAFG00000022172,OR11A1,IGSF1,ENSCAFG00000023200,ENSCAFG00000023198
1501	BMD	16	22,206,284	22,448,588	242.305	0.149188	0.636509	3	RNF32,LMBR1,NOM1
1502	IrW	36	22,713,182	22,955,379	242.198	0.149652	0.636791	7	KIAA1715,ENSCAFG00000013399,EVX2,HOXD12,HOXD11,HOXD9,HOXD10
1503	Sci	36	22,713,182	22,955,379	242.198	0.149652	0.636791	7	KIAA1715,ENSCAFG00000013399,EVX2,HOXD12,HOXD11,HOXD9,HOXD10
1504	BoC	7	55,703,369	55,945,553	242.185	0.149652	0.636791	1	ENSCAFG00000017759
1505	ShP	5	34,738,198	34,980,333	242.136	0.15	0.636791	14	Q8MJY0_CANFA,PLD2,PSMB6,GLTPD2,VMO1,TM4SF5,ZMYND15,CXCL16,MED11,ARRB2,ENSCAFG00000022618,PELP1,ALOX15,ENSCAFG00000023009
1506	GoS	10	9,506,695	9,748,801	242.107	0.150116	0.636791	3	ENSCAFG00000028219,C16orf61,TMEM5
1507	Wei	3	71,573,298	71,815,398	242.101	0.150232	0.636791
1508	FSp	5	83,861,310	84,103,388	242.079	0.150232	0.636791	3	ENSCAFG00000024417,CDH3,ZFP90
1509	Bgl	22	20,753,294	20,995,346	242.053	0.150232	0.636791
1510	Bgl	18	9,385,054	9,627,037	241.984	0.150348	0.636791	3	XM_533075.2,C7orf44,STK17A
1511	TYo	34	13,137,372	13,379,336	241.965	0.150348	0.636791	1	IRX2
1512	Sci	10	12,410,052	12,652,002	241.951	0.150348	0.636791	2	ENSCAFG00000000392,CAND1
1513	ShP	3	38,005,218	38,247,132	241.915	0.15058	0.637352
1514	FSp	1	64,289,052	64,530,946	241.895	0.150812	0.637913
1515	Gry	18	41,654,599	41,896,479	241.881	0.150928	0.637982	9	UBE2L6,SMTNL1,TIMM10,SLC43A1,SLC43A3,PRG2,Q64F95_CANFA,SSRP1,TNKS1BP1
1516	BoC	6	5,224,091	5,465,923	241.833	0.151276	0.638533	1	WBSCR17
1517	Rtw	11	52,046,833	52,288,596	241.764	0.151276	0.638533
1518	Bgl	22	8,158,156	8,399,906	241.751	0.151392	0.638533	3	ENSCAFG00000025204,SIAH3,SPERT
1519	TYo	2	46,082,518	46,324,171	241.654	0.15174	0.638533	2	Q8SPV0_CANFA,ENSCAFG00000006908
1520	Dob	4	41,107,944	41,349,593	241.65	0.15174	0.638533	1	MSX2_CANFA
1521	BoC	11	9,773,895	10,015,516	241.622	0.15174	0.638533
1522	StP	37	12,570,551	12,812,129	241.579	0.151856	0.638533	5	KCTD18,SGOL2,XM_852631.1,AOX1,ENSCAFG00000024457
1523	NSD	3	56,522,827	56,764,379	241.553	0.151856	0.638533	5	IQGAP1,ENSCAFG00000022698,ZNF774,ZSCAN2,ENSCAFG00000023242
1524	Dac	11	11,626,254	11,867,758	241.505	0.152088	0.639078	2	TNFAIP8,HSD17B4
1525	FSp	10	9,663,107	9,904,595	241.489	0.152204	0.639078	1	SRGAP1
1526	Dac	11	63,353,813	63,595,221	241.409	0.152552	0.639078	8	ENSCAFG00000023548,ENSCAFG00000021557,ENSCAFG00000002676,ENSCAFG00000002677,cOR13C16,OR13C8,Q70ZD4_CANFA,XM_850522.1
1527	Dob	17	42,653,751	42,895,158	241.408	0.152552	0.639078	6	SH2D6,CAPG,ELMOD3,RETSAT,TGOLN2,ENSCAFG00000007832
1528	FSp	5	7,661,842	7,903,247	241.406	0.152552	0.639078	6	ST14,APLP2,ENSCAFG00000010143,ENSCAFG00000021820,ENSCAFG00000022320,PRDM10
1529	StP	10	10,907,439	11,148,822	241.384	0.152784	0.639078	2	MSRB3,ENSCAFG00000027222
1530	LRe	10	10,907,439	11,148,822	241.384	0.152784	0.639078	2	MSRB3,ENSCAFG00000027222
1531	NFd	10	10,907,439	11,148,822	241.384	0.152784	0.639078	2	MSRB3,ENSCAFG00000027222
1532	GSl	4	37,378,857	37,620,144	241.288	0.153132	0.640116	3	WAPAL,OPN4,LDB3
1533	BrS	12	48,185,761	48,427,001	241.241	0.153248	0.640183
1534	BrS	24	34,024,815	34,266,024	241.21	0.153596	0.641132	3	Q9XSS6_CANFA,L3MBTL,SGK2
1535	BMD	1	66,988,919	67,230,045	241.127	0.154176	0.641132	1	RNF217
1536	GRe	25	30,937,114	31,178,236	241.123	0.154176	0.641132	2	MSRA,cfa-mir-124-1
1537	Dob	31	6,587,252	6,828,339	241.088	0.154176	0.641132
1538	Elk	1	97,615,049	97,856,134	241.086	0.154176	0.641132	1	ENSCAFG00000002155
1539	CoS	16	25,653,059	25,894,141	241.083	0.154176	0.641132	6	XM_539949.2,FNTA,ENSCAFG00000026073,HOOK3,RNF170,THAP1
1540	IrW	20	13,519,827	13,760,859	241.033	0.154176	0.641132	1	GRM7
1541	EBD	8	52,196,955	52,437,917	240.963	0.154872	0.643608	2	ENSCAFG00000027729,ESRRB
1542	Wei	16	19,300,424	19,541,299	240.876	0.15522	0.644636	3	XRCC2,ACTR3B,ENSCAFG00000026282
1543	BoT	3	43,576,160	43,816,982	240.823	0.155452	0.644763	1	ADAMTS17
1544	GRe	3	43,576,160	43,816,982	240.823	0.155452	0.644763	1	ADAMTS17
1545	FSp	17	60,206,311	60,447,092	240.782	0.155684	0.64489	1	PDE4DIP
1546	ShP	24	3,049,146	3,289,924	240.779	0.155684	0.64489	6	XM_843201.1,CST8,ENSCAFG00000005120,CST11,NAPB,GZF1
1547	Wei	15	27,166,532	27,407,221	240.69	0.156265	0.646879	2	CCDC59,C12orf26
1548	Gry	37	31,626,973	31,867,543	240.571	0.157077	0.64982	3	SGPP2,FARSB,MOGAT1
1549	Rtw	22	19,782,267	20,022,777	240.511	0.157309	0.650359	1	ENSCAFG00000026813
1550	Wei	11	31,578,686	31,819,146	240.461	0.157541	0.650479	1	C9orf123
1551	TYo	3	14,596,954	14,837,412	240.459	0.157541	0.650479
1552	GSl	18	8,606,761	8,847,112	240.352	0.158353	0.651312	1	ENSCAFG00000022264
1553	IrW	10	10,265,925	10,506,272	240.348	0.158353	0.651312	3	RASSF3,Q32KH4_CANFA,TBC1D30
1554	GSh	10	10,265,925	10,506,272	240.348	0.158353	0.651312	3	RASSF3,Q32KH4_CANFA,TBC1D30
1555	Gry	10	10,265,925	10,506,272	240.348	0.158353	0.651312	3	RASSF3,Q32KH4_CANFA,TBC1D30
1556	BrS	10	10,265,925	10,506,272	240.348	0.158353	0.651312	3	RASSF3,Q32KH4_CANFA,TBC1D30
1557	GoS	10	10,265,925	10,506,272	240.348	0.158353	0.651312	3	RASSF3,Q32KH4_CANFA,TBC1D30
1558	Wei	5	6,811,163	7,051,426	240.264	0.158585	0.651847	2	ENSCAFG00000020853,SNX19
1559	Wei	34	25,144,589	25,384,667	240.079	0.158933	0.652859	2	ENSCAFG00000024349,CLDN1
1560	BoT	19	15,220,459	15,460,480	240.022	0.159397	0.653507	2	PHF17,ENSCAFG00000003819
1561	LRe	2	18,532,046	18,772,053	240.008	0.159397	0.653507	2	ENSCAFG00000020219,ZNF438
1562	FSp	26	17,265,273	17,505,273	240.001	0.159397	0.653507	4	KSR2,RFC5,WSB2,VSIG10
1563	GSl	38	17,652,134	17,892,101	239.968	0.159629	0.65404	4	SLC30A10,EPRS,BPNT1,IARS2
1564	JRT	28	32,559,187	32,799,096	239.91	0.160093	0.654189	4	GRK5,RGS10,TIAL1,BAG3
1565	NFd	23	40,186,124	40,425,981	239.858	0.160209	0.654189	2	ACPL2,XM_847264.1
1566	ESt	19	46,039,417	46,279,230	239.814	0.160325	0.654189	1	ENSCAFG00000005403
1567	ESt	8	68,057,384	68,297,192	239.809	0.160325	0.654189	5	ENSCAFG00000017723,ATG2B,C14orf129,AK7,PAPOLA
1568	NSD	4	11,683,060	11,922,858	239.799	0.160325	0.654189	4	Q95159_CANFA,COG2,cfa-mir-1841,ENSCAFG00000022100
1569	StP	16	11,509,368	11,749,142	239.775	0.160557	0.654189	3	RAB19,SLC37A3,JHDM1D
1570	ShP	12	42,388,228	42,627,990	239.763	0.160557	0.654189	2	ENSCAFG00000028070,ENSCAFG00000023918
1571	GSh	10	12,082,601	12,322,353	239.753	0.160557	0.654189	1	ENSCAFG00000000389
1572	NSD	25	40,659,386	40,899,116	239.731	0.160789	0.654189	2	FAM124B,CUL3
1573	ESt	7	75,879,349	76,119,071	239.723	0.160789	0.654189
1574	IrW	9	54,373,687	54,613,382	239.696	0.160789	0.654189	3	KIAA0649,MRPS2,ENSCAFG00000019863
1575	NFd	32	28,737,607	28,977,197	239.591	0.161369	0.656131
1576	NFd	2	67,082,423	67,321,958	239.536	0.161833	0.657601	2	SALL1,ENSCAFG00000009766
1577	GoS	10	11,722,019	11,961,276	239.258	0.162877	0.659596	3	ENSCAFG00000000376,HELB,GRIP1
1578	LRe	1	23,974,550	24,213,788	239.239	0.162877	0.659596	4	C18orf54,ENSCAFG00000024276,STARD6,POLI
1579	GSl	1	45,075,805	45,315,038	239.234	0.162877	0.659596	1	ESR1
1580	BMD	1	102,090,037	102,329,195	239.159	0.162993	0.659596	6	ENSCAFG00000024350,NOL8,ENSCAFG00000028066,IARS,ENSCAFG00000002343,ENSCAFG00000002346
1581	ShP	15	12,343,946	12,583,083	239.138	0.162993	0.659596	5	RAB3B,ENSCAFG00000028006,NRD1,cfa-mir-761,OSBPL9
1582	Rtw	8	6,586,131	6,825,168	239.038	0.163457	0.659596	13	B2CL2_CANFA,SLC22A17,EFS,IL25,CMTM5,MYH7_CANFA,cfa-mir-208a,cfa-mir-208b,NGDN,ZFHX2,THTPA,AP1G2,ENSCAFG00000025487
1583	TYo	19	28,697,135	28,936,157	239.023	0.163457	0.659596	2	CNTP5_CANFA,ENSCAFG00000024222
1584	Eur	7	24,325,366	24,564,387	239.022	0.163457	0.659596	1	ENSCAFG00000025259
1585	BrS	4	80,080,185	80,319,177	238.993	0.163457	0.659596
1586	EBD	25	19,194,142	19,433,106	238.965	0.163457	0.659596	1	FGF9
1587	BMD	6	58,503,768	58,742,715	238.948	0.163457	0.659596	2	BCAR3,FNBP1L
1588	JRT	33	11,252,649	11,491,467	238.819	0.163805	0.659805	1	ENSCAFG00000009657
1589	TYo	32	15,518,521	15,757,306	238.786	0.163921	0.659805	2	ENSCAFG00000009864,ENSCAFG00000009870
1590	ShP	32	15,518,521	15,757,306	238.786	0.163921	0.659805	2	ENSCAFG00000009864,ENSCAFG00000009870
1591	GSh	10	11,231,464	11,470,246	238.783	0.163921	0.659805	1	ENSCAFG00000022943
1592	Eur	12	36,128,120	36,366,886	238.767	0.164153	0.660324	2	A1EAA2_CANFA,B3GA2_CANFA
1593	JRT	8	48,666,368	48,905,062	238.695	0.164617	0.66136
1594	BoT	4	7,727,921	7,966,609	238.689	0.164617	0.66136	5	ARID4B,RBM34,TOMM20,ENSCAFG00000025761,ENSCAFG00000020876
1595	Rtw	19	27,848,754	28,087,359	238.606	0.165429	0.663373
1596	Eur	10	57,685,226	57,923,830	238.605	0.165429	0.663373	1	ASB3
1597	TYo	15	48,773,952	49,012,545	238.594	0.165429	0.663373	3	EDNRA_CANFA,TMEM184C,PRMT10
1598	BMD	14	19,497,274	19,735,703	238.43	0.165893	0.663966	1	PFTK1
1599	BoC	22	12,411,515	12,649,889	238.375	0.166241	0.663966	4	KBTBD6,WBP4,ELF1,SUGT1
1600	JRT	8	24,203,358	24,441,720	238.363	0.166241	0.663966
1601	GSh	9	15,139,234	15,377,558	238.325	0.166241	0.663966	5	ENSCAFG00000025798,ENSCAFG00000026738,TEX2,XM_848326.1,ENSCAFG00000011727
1602	JRT	8	21,835,629	22,073,934	238.306	0.166241	0.663966	1	ENSCAFG00000027558
1603	IrW	7	74,778,797	75,017,069	238.273	0.166357	0.663966	2	ENSCAFG00000018558,EPB41L3
1604	BMD	1	55,814,485	56,052,747	238.263	0.166357	0.663966	1	ENSCAFG00000000776
1605	NSD	2	38,198,355	38,436,552	238.198	0.166473	0.663966	5	C5orf32,ENSCAFG00000005736,XM_547780.2,HBEGF,SLC4A9
1606	BeT	16	15,381,345	15,619,532	238.188	0.166589	0.663966	3	FAM180A,SLC13A4,NUP205
1607	GoS	32	9,749,227	9,987,331	238.105	0.166705	0.663966	7	SEC31A,Q59AC2_CANFA,LIN54,COPS4,ENSCAFG00000012165,ENSCAFG00000009073,PLAC8
1608	IrW	1	65,257,550	65,495,597	238.048	0.166821	0.663966	2	RLBP1L2,TRDN_CANFA
1609	GRe	36	32,493,844	32,731,886	238.043	0.166821	0.663966	1	NP_001003243.1
1610	BMD	8	63,084,196	63,322,134	237.939	0.167053	0.664477	1	TTC8
1611	GSl	1	45,867,559	46,105,437	237.879	0.167633	0.665544	4	ENSCAFG00000000523,MYCT1,VIP_CANFA,ENSCAFG00000000540
1612	GoS	16	7,997,352	8,235,202	237.851	0.167633	0.665544
1613	Bgl	26	16,560,982	16,798,829	237.848	0.167633	0.665544	4	FBXW8,TESC,FBXO21,ENSCAFG00000021248
1614	IrW	9	55,471,508	55,709,278	237.771	0.167865	0.665639	2	MED27,ENSCAFG00000025881
1615	Dac	1	3,914,330	4,152,087	237.758	0.167865	0.665639	3	CTDP1,NFATC1,ATP9B
1616	Sci	7	39,101,270	39,338,951	237.682	0.168097	0.666147	1	ENSCAFG00000015841
1617	Elk	X	105,932,059	106,169,685	237.627	0.168445	0.667113	2	XM_549261.2,FRMD7
1618	GSh	5	68,213,962	68,451,424	237.463	0.169258	0.667536	5	ENSCAFG00000019894,ENSCAFG00000019899,XM_855600.1,KLHDC4,JPH3
1619	Sci	34	24,237,687	24,475,130	237.444	0.169258	0.667536	2	ENSCAFG00000013927,TPRG1
1620	Wei	4	78,255,358	78,492,796	237.439	0.169258	0.667536	3	ZFR,ENSCAFG00000027374,MTMR12
1621	TYo	3	35,027,351	35,264,780	237.43	0.169258	0.667536	2	TUBGCP5,OCA2
1622	GoS	6	64,178,563	64,415,967	237.405	0.169258	0.667536	4	HS2ST1,XM_850222.1,ENSCAFG00000016674,ENSCAFG00000020238
1623	FSp	10	44,427,894	44,665,280	237.387	0.169258	0.667536	3	Q66N59_CANFA,ENSCAFG00000002190,ENSCAFG00000002192
1624	Eur	8	23,183,288	23,420,635	237.348	0.16949	0.667536
1625	StP	28	33,218,449	33,455,763	237.315	0.16949	0.667536
1626	IrW	28	33,218,449	33,455,763	237.315	0.16949	0.667536
1627	FSp	5	76,346,994	76,584,246	237.253	0.169838	0.667675	4	VAT1L,ENSCAFG00000027744,ENSCAFG00000026228,NUDT7
1628	Rtw	11	35,157,341	35,394,549	237.209	0.169838	0.667675	2	ENSCAFG00000021994,ENSCAFG00000001473
1629	BrS	X	42,356,040	42,593,220	237.181	0.169838	0.667675	2	XM_850302.1,ENSCAFG00000015951
1630	Sci	10	7,845,331	8,082,416	237.086	0.170418	0.669134
1631	Elk	10	7,845,331	8,082,416	237.086	0.170418	0.669134
1632	GSl	X	86,705,916	86,942,908	236.993	0.17123	0.671498	3	ENSCAFG00000022649,ENSCAFG00000018104,CHRDL1
1633	ShP	9	7,740,690	7,977,677	236.988	0.17123	0.671498	12	WBP2,UNC13D,UNK_CANFA,ENSCAFG00000021083,H3F3B,GALK1_CANFA,ITGB4,SAP30BP,ENSCAFG00000025513,XM_540436.2,ENSCAFG00000004837,LLGL2
1634	IrW	X	73,966,869	74,203,825	236.957	0.171578	0.672451	2	XM_846363.1,ENSCAFG00000027604
1635	Elk	32	11,573,885	11,810,628	236.744	0.172854	0.676124	2	ENSCAFG00000009247,ENSCAFG00000027978
1636	Elk	10	30,951,911	31,188,654	236.744	0.172854	0.676124	4	EIF3D,FOXRED2,TXN2,MYH9_CANFA
1637	CoS	10	14,118,731	14,355,368	236.638	0.17355	0.676124	3	CPSF6,LYSC2_CANFA,YEATS4
1638	EBD	16	25,230,044	25,466,678	236.635	0.17355	0.676124	2	CSGALNACT1,ENSCAFG00000005342
1639	Eur	30	4,056,312	4,292,944	236.633	0.17355	0.676124	2	AVEN,RYR3
1640	BrS	5	19,717,430	19,954,059	236.63	0.17355	0.676124	6	SIK3,APOA1_CANFA,APOC3_CANFA,APOA4,ZNF259,BUD13
1641	Sci	31	19,040,146	19,276,762	236.617	0.17355	0.676124
1642	NSD	16	6,832,861	7,069,442	236.582	0.173666	0.676124	1	ENSCAFG00000022418
1643	Gry	10	12,783,975	13,020,500	236.526	0.173782	0.676124	1	DYRK2
1644	Bgl	27	36,762,817	36,999,301	236.485	0.173782	0.676124	3	DUSP16,LOH12CR1,MANSC1
1645	JRT	11	37,309,297	37,545,779	236.483	0.173782	0.676124
1646	BrS	13	45,948,290	46,184,754	236.465	0.173782	0.676124	2	ENSCAFG00000023952,GABRB1
1647	Gry	17	59,451,335	59,687,723	236.389	0.174478	0.677186	3	HAO2,3BHS_CANFA,ZNF697
1648	BoT	28	32,995,718	33,232,105	236.388	0.174478	0.677186	2	SEC23IP,ENSCAFG00000012316
1649	Rtw	3	70,237,721	70,474,108	236.388	0.174478	0.677186	1	ENSCAFG00000025672
1650	GoS	37	18,327,761	18,564,135	236.375	0.174478	0.677186	3	CPO,KLF7,ENSCAFG00000028380
1651	Elk	27	42,126,604	42,362,868	236.265	0.175058	0.677839	1	ANO2
1652	GSl	7	26,059,833	26,296,089	236.257	0.175058	0.677839	4	XM_547452.2,ENSCAFG00000023760,ENSCAFG00000021016,RFWD2
1653	GSl	9	27,373,898	27,610,112	236.215	0.175174	0.677839	12	TBKBP1,TBX21,OSBPL7,MRPL10,LRRC46,SCRN2,SP6,SP2,LOC612030,PNPO,PRR15L,CDK5RAP3
1654	Dac	12	36,673,151	36,909,311	236.161	0.17529	0.677839	4	OGFRL1,cfa-mir-30c-2,ENSCAFG00000026626,cfa-mir-30a
1655	GoS	2	39,971,236	40,207,359	236.124	0.175638	0.677839	1	SPRY4
1656	NSD	4	10,361,124	10,597,177	236.054	0.17587	0.677839	2	ENSCAFG00000024762,ENSCAFG00000028275
1657	Eur	32	25,641,483	25,877,531	236.049	0.17587	0.677839	1	Q863Z3_CANFA
1658	BMD	22	9,810,228	10,046,261	236.034	0.17587	0.677839	2	C13orf31,CCDC122
1659	BeT	11	69,701,205	69,937,223	236.019	0.17587	0.677839	4	SUSD1,ROD1,ENSCAFG00000003019,XM_848518.1
1660	LRe	25	45,392,740	45,628,500	235.761	0.176798	0.677839	3	SP110,SP140,SP100
1661	Dob	4	26,210,011	26,445,730	235.72	0.176798	0.677839	2	CBARA1,ENSCAFG00000027212
1662	BrS	8	4,864,032	5,099,699	235.668	0.176798	0.677839	4	GOLGA5,CHGA,ITPK1,ENSCAFG00000027952
1663	GSl	12	48,907,551	49,143,136	235.586	0.176914	0.677839	1	ENSCAFG00000027238
1664	JRT	16	27,483,637	27,719,211	235.575	0.176914	0.677839	1	ZMAT4
1665	Rtw	24	26,824,672	27,060,241	235.57	0.176914	0.677839	7	NCOA6,GGT7,ACSS2,Q6PXD9_CANFA,MYH7B,cfa-mir-499,TRPC4AP
1666	Dob	31	10,014,997	10,250,521	235.525	0.177146	0.677839
1667	NSD	16	37,526,674	37,762,162	235.489	0.177262	0.677839	3	ENSCAFG00000006574,ENSCAFG00000025023,DUSP4
1668	Rtw	33	27,428,249	27,663,677	235.429	0.177378	0.677839	2	ENSCAFG00000027135,STXBP5L
1669	BoT	7	56,686,872	56,922,280	235.409	0.177378	0.677839	1	ENSCAFG00000023519
1670	ShP	8	57,654,413	57,889,820	235.408	0.177378	0.677839
1671	BoC	3	37,830,447	38,065,848	235.402	0.177378	0.677839	1	ATP10A
1672	BoT	10	14,946,366	15,181,707	235.342	0.177378	0.677839	1	CNOT2
1673	NSD	32	34,995,857	35,231,179	235.323	0.177494	0.677839	4	AP1AR,TIFA,XP_853318.1,ALPK1
1674	GSl	10	12,211,334	12,446,649	235.316	0.177494	0.677839	1	ENSCAFG00000000389
1675	StP	16	10,701,492	10,936,751	235.26	0.17761	0.677839	1	XM_539881.2
1676	Rtw	2	78,119,475	78,354,731	235.257	0.17761	0.677839	6	NIPAL3,C1orf201,ENSCAFG00000026949,GRHL3,IL28RA,IL22RA1
1677	CoS	12	38,419,843	38,655,096	235.254	0.17761	0.677839	8	C6orf221,OOEP_CANFA,ENSCAFG00000020933,DDX43,C6orf150,MTO1,Q866G8_CANFA,SLC17A5
1678	Bgl	12	38,419,843	38,655,096	235.254	0.17761	0.677839	8	C6orf221,OOEP_CANFA,ENSCAFG00000020933,DDX43,C6orf150,MTO1,Q866G8_CANFA,SLC17A5
1679	IrW	10	42,585,302	42,820,509	235.208	0.17819	0.679648	1	XM_538446.2
1680	GSl	5	10,150,114	10,385,293	235.18	0.178422	0.679985
1681	ESt	25	21,039,358	21,274,406	235.049	0.178886	0.679985	3	ZMYM2,ZMYM5,PSPC1
1682	Sci	24	15,378,775	15,613,793	235.019	0.178886	0.679985	1	PAK7
1683	GRe	34	20,959,293	21,194,309	235.017	0.178886	0.679985	2	C3orf70,EHHADH
1684	StP	28	31,897,674	32,132,658	234.985	0.179002	0.679985	2	PRLHR,C10orf46
1685	Rtw	21	16,824,247	17,059,153	234.907	0.179234	0.679985
1686	NSD	3	20,295,114	20,529,992	234.879	0.179234	0.679985
1687	Wei	2	33,160,740	33,395,599	234.86	0.179234	0.679985	6	ENSCAFG00000027751,CALML3,CALML5,NET1,TUBAL3,UCN3
1688	NSD	3	84,699,707	84,934,559	234.853	0.179234	0.679985
1689	LRe	1	16,497,680	16,732,429	234.75	0.179814	0.681523	5	SERPINB13,SERPINB12,SERPINB5,Q6JDF5_CANFA,KDSR
1690	BrS	7	38,837,754	39,072,439	234.686	0.180046	0.681523	1	ENSCAFG00000024441
1691	GoS	30	13,991,422	14,225,935	234.514	0.180046	0.681523	5	CASC4,CTDSPL2,ENSCAFG00000013560,EIF3J,SPG11
1692	GRe	29	21,053,448	21,287,914	234.467	0.180278	0.681523	1	C8orf34
1693	Dob	29	17,668,083	17,902,517	234.435	0.180278	0.681523	1	ENSCAFG00000027917
1694	BeT	21	6,368,063	6,602,481	234.419	0.180278	0.681523	1	ENSCAFG00000013779
1695	IrW	5	61,044,607	61,278,980	234.374	0.180394	0.681559	7	ARHGEF16,MEGF6,cfa-mir-551a,TPRG1L,WDR8,Q8WMQ8_CANFA,CCDC27
1696	BeT	21	7,526,321	7,760,585	234.265	0.180626	0.682034	1	XM_843668.1
1697	GRe	19	4,665,639	4,899,819	234.181	0.180742	0.682069	1	ZNF330
1698	GoS	18	28,575,021	28,809,192	234.172	0.180974	0.682141	16	PTDSS2,RNH1,ENSCAFG00000025581,LRRC56,C11orf35,RASSF7,cfa-mir-210,PHRF1,IRF7,MUPCDH,Q589Y6_CANFA,DEAF1,ENSCAFG00000026958,TMEM80,EPS8L2,ACCSL
1699	IrW	2	4,482,377	4,716,458	234.082	0.180974	0.682141	2	XM_843492.1,ENSCAFG00000026967
1700	ShP	1	68,615,624	68,849,630	234.007	0.181439	0.683491	1	ENSCAFG00000001064
1701	Elk	5	83,447,231	83,681,168	233.938	0.181555	0.683526	5	SNTB2,CHTF8,CIRH1A,HAS3,TMCO7
1702	GoS	19	12,416,883	12,650,794	233.912	0.181787	0.683998	1	ENSCAFG00000028273
1703	Elk	24	23,532,064	23,765,937	233.874	0.182019	0.684468	10	C20orf96,Q30KS2_CANFA,Q30KS5_CANFA,Q30KS6_CANFA,Q30KS7_CANFA,Q30KS8_CANFA,Q30KR5_CANFA,Q30KS9_CANFA,ENSCAFG00000028045,Q30KR4_CANFA
1704	BrS	2	80,391,177	80,624,871	233.695	0.183643	0.688947	3	RAP1GAP,ENSCAFG00000026665,Q8HZP7_CANFA
1705	EBD	2	29,659,524	29,893,130	233.607	0.183991	0.688947	1	ENSCAFG00000026050
1706	BeT	19	31,648,190	31,881,747	233.558	0.184107	0.688947	3	ENSCAFG00000026842,CLASP1,O18986_CANFA
1707	NSD	20	19,029,588	19,263,139	233.552	0.184223	0.688947	2	CNTN6,ENSCAFG00000028321
1708	Sci	11	23,777,146	24,010,686	233.541	0.184223	0.688947	8	IRF1,IL5_CANFA,RAD50,ENSCAFG00000000877,ENSCAFG00000027310,IL13_CANFA,IL4_CANFA,KIF3A
1709	Eur	22	53,957,818	54,191,249	233.432	0.184223	0.688947	2	NALCN,ITGBL1
1710	CoS	10	33,268,557	33,501,973	233.417	0.184223	0.688947	1	ENSCAFG00000001740
1711	GSl	16	17,608,880	17,842,189	233.31	0.184571	0.688947	11	ENSCAFG00000004548,ENSCAFG00000004551,XM_855115.1,ZNF775,GIMAP8,GIMAP1,GIMAP7,GIMAP4,GIMAP6,GIMAP2,GIMAP5
1712	BoC	23	21,557,518	21,790,809	233.292	0.184687	0.688947
1713	GSl	2	25,742,204	25,975,450	233.247	0.184803	0.688947	2	PRPF18,BEND7
1714	CoS	17	12,152,850	12,386,084	233.235	0.184803	0.688947	1	TRIB2_CANFA
1715	BoT	21	4,801,418	5,034,632	233.215	0.184803	0.688947	1	ENSCAFG00000022278
1716	GRe	24	6,712,147	6,945,330	233.184	0.184803	0.688947
1717	Rtw	19	38,476,791	38,709,957	233.167	0.184803	0.688947	3	GPR39,LYPD1,ENSCAFG00000005003
1718	GSh	17	8,137,880	8,371,021	233.142	0.184919	0.688947
1719	BeT	37	22,009,315	22,242,417	233.103	0.185151	0.688947	2	ENSCAFG00000014176,XM_545629.2
1720	BrS	5	47,493,970	47,727,062	233.093	0.185383	0.688947	3	ENSCAFG00000018594,ENSCAFG00000018596,NP_001019805.1
1721	ShP	19	7,567,958	7,801,045	233.088	0.185383	0.688947
1722	EBD	20	4,620,996	4,854,057	233.062	0.185499	0.688947	5	GPR175,MCM2,Q3HR32_CANFA,ABTB1,MGLL
1723	ESt	22	37,483,849	37,716,885	233.037	0.185499	0.688947
1724	GSh	32	33,080,541	33,313,534	232.994	0.185731	0.688947	2	EGF_CANFA,ELOVL6
1725	Bgl	6	10,899,201	11,132,170	232.97	0.185847	0.688947	3	CUX1,ENSCAFG00000023187,ENSCAFG00000021153
1726	StP	4	44,980,187	45,213,099	232.913	0.185963	0.688947	2	DOCK2,FAM196B
1727	ESt	2	22,955,816	23,188,692	232.877	0.186079	0.688947	3	RSU1,C1QL3,PTER
1728	NFd	33	21,886,559	22,119,415	232.857	0.186195	0.688947
1729	Bgl	8	45,090,373	45,323,098	232.726	0.186427	0.688947	1	ENSCAFG00000028171
1730	NSD	9	60,548,128	60,780,780	232.653	0.186659	0.688947	2	PBX3,ENSCAFG00000028003
1731	Bgl	7	41,502,990	41,735,611	232.622	0.186659	0.688947	3	LIN9,ENSCAFG00000016113,ACBD3
1732	BoC	23	23,264,165	23,496,718	232.554	0.186775	0.688947	2	ENSCAFG00000027786,XM_542765.2
1733	IrW	5	83,819,550	84,052,008	232.459	0.187355	0.688947	4	Q95LE0_CANFA,ENSCAFG00000024417,CDH3,ZFP90
1734	LRe	13	56,751,886	56,984,338	232.453	0.187355	0.688947	1	ENSCAFG00000002378
1735	ShP	38	11,381,450	11,613,884	232.435	0.187355	0.688947	1	FAM5C
1736	GSh	5	54,142,978	54,375,408	232.431	0.187355	0.688947	1	OMA1
1737	Elk	3	50,823,311	51,055,740	232.43	0.187355	0.688947	2	ENSCAFG00000011241,ENSCAFG00000024024
1738	NSD	12	33,742,142	33,974,543	232.402	0.187355	0.688947	1	ENSCAFG00000002522
1739	GRe	10	41,813,783	42,046,052	232.27	0.187935	0.688947
1740	Wei	2	35,990,436	36,222,685	232.25	0.188051	0.688947
1741	Gry	5	35,313,124	35,545,353	232.23	0.188051	0.688947	26	TNK1,PLSCR3,C17orf61,NLGN2,SPEM1,C17orf74,TMEM102,ENSCAFG00000016299,CHRNB1,ZBTB4,ENSCAFG00000024667,Q38QA0_CANFA,ENSCAFG00000016613,B5B3U5_CANFA,SENP3,LOC612030,ENSCAFG00000026046,ENSCAFG00000027886,ENSCAFG00000025953,CD68,MPDU1,SOX15,FXR2,SAT2,SHBG,ATP1
1742	Sci	24	34,119,979	34,352,200	232.222	0.188051	0.688947	6	Q9XSS6_CANFA,L3MBTL,SGK2,IFT52,MYBL2,ENSCAFG00000022595
1743	BrS	5	65,394,827	65,626,903	232.077	0.188051	0.688947	4	SLC2A5,GPR157,cfa-mir-34a,H6PD
1744	Gry	4	32,351,258	32,583,329	232.072	0.188051	0.688947	5	ZCCHC24,ANXA11,ENSCAFG00000015748,ENSCAFG00000027021,ENSCAFG00000023232
1745	Eur	21	25,063,190	25,295,202	232.013	0.188051	0.688947	3	C11orf30,ENSCAFG00000005269,XM_847884.1
1746	Wei	15	31,946,814	32,178,819	232.006	0.188051	0.688947	1	C12orf50
1747	JRT	24	22,683,407	22,915,392	231.986	0.188283	0.688947	3	RAD21L1,C20orf46,PSMF1
1748	NFd	7	28,198,812	28,430,753	231.942	0.188631	0.688947	16	RC3H1,SERPINC1,ZBTB37,KLHL20,ENSCAFG00000026115,ENSCAFG00000026603,ENSCAFG00000026209,ENSCAFG00000025973,ENSCAFG00000026367,ENSCAFG00000026247,ENSCAFG00000026385,ENSCAFG00000025882,ENSCAFG00000022659,ENSCAFG00000021344,DARS2,CENPL
1749	Sci	24	38,489,184	38,721,044	231.861	0.188979	0.688947	1	ARFGEF2
1750	GRe	7	69,128,766	69,360,606	231.841	0.188979	0.688947	4	ENSCAFG00000028035,MIB1,cfa-mir-1-2,cfa-mir-133a
1751	Gry	3	93,897,764	94,129,590	231.827	0.188979	0.688947	3	ANAPC13,LCORL,NCAPG
1752	GRe	34	15,845,567	16,077,382	231.816	0.189095	0.688947	5	GNB4,ACTL6A,ENSCAFG00000011380,XM_531628.2,USP13
1753	BoC	26	3,793,572	4,025,325	231.754	0.189211	0.688947	8	NOC4L,DDX51,ENSCAFG00000024929,ENSCAFG00000026131,ENSCAFG00000006377,PUS1,ULK1,MMP17
1754	Sci	11	24,238,732	24,470,485	231.754	0.189211	0.688947	3	ENSCAFG00000027084,HSP74_CANFA,ENSCAFG00000000968
1755	NSD	4	21,700,815	21,932,516	231.702	0.189211	0.688947
1756	Bgl	24	8,385,008	8,616,690	231.683	0.189211	0.688947	4	RRBP1,ENSCAFG00000005481,BFSP1,PCSK2
1757	GSl	13	51,299,604	51,531,240	231.637	0.189327	0.688947	3	ENSCAFG00000027026,KIAA1211,AASDH
1758	Eur	25	24,716,202	24,947,801	231.6	0.189791	0.688947	1	XM_847016.1
1759	BoT	19	12,277,419	12,508,859	231.441	0.190255	0.688947
1760	Elk	24	5,292,617	5,524,041	231.425	0.190255	0.688947	3	ENSCAFG00000005214,ENSCAFG00000005232,ENSCAFG00000027317
1761	Rtw	24	24,803,413	25,034,753	231.341	0.190371	0.688947	2	C20orf112,COMMD7
1762	GoS	20	8,147,201	8,378,464	231.264	0.190487	0.688947	8	MRPS25,ZFYVE20,TRH,ENSCAFG00000004589,ENSCAFG00000026938,ENSCAFG00000004590,ENSCAFG00000024516,ENSCAFG00000027846
1763	NSD	5	52,199,832	52,430,947	231.116	0.190951	0.688947
1764	IrW	4	77,756,585	77,987,587	231.003	0.191183	0.688947
1765	BrS	13	49,640,740	49,871,736	230.997	0.191183	0.688947	1	Q6E7G6_CANFA
1766	BrS	37	4,302,210	4,533,122	230.913	0.191299	0.688947	7	ENSCAFG00000009501,ENSCAFG00000022362,GLS,ENSCAFG00000023790,ENSCAFG00000023726,ENSCAFG00000023648,STAT1
1767	BMD	1	38,264,271	38,495,159	230.889	0.191415	0.688947	5	PHACTR2,ENSCAFG00000000313,LTV1,C6orf94,PLAGL1
1768	Eur	2	47,316,847	47,547,676	230.83	0.191647	0.688947	2	ENSCAFG00000027008,XM_544346.1
1769	CoS	1	104,526,221	104,756,979	230.759	0.191763	0.688947	5	XM_848788.1,ENSCAFG00000002476,ZNF582,ENSCAFG00000024243,ZNF667
1770	StP	21	15,678,556	15,909,244	230.689	0.191879	0.688947	3	FZD4,ENSCAFG00000021369,ENSCAFG00000004402
1771	BoT	19	18,596,096	18,826,778	230.683	0.191879	0.688947
1772	Rtw	12	63,410,464	63,641,132	230.669	0.191879	0.688947
1773	BeT	3	56,972,702	57,203,362	230.661	0.191995	0.688947	6	ALPK3,SLC28A1,ENSCAFG00000022842,ENSCAFG00000027545,RS17_CANFA,PDE8A
1774	Wei	2	51,917,981	52,148,634	230.654	0.191995	0.688947	1	ENSCAFG00000007256
1775	Eur	9	24,357,721	24,588,355	230.635	0.191995	0.688947	10	Q6VAH9_CANFA,HAP1,GAST_CANFA,Q9XST3_CANFA,XM_548099.2,O97624_CANFA,K1C9_CANFA,A7XZY9_CANFA,KRT15,KRT13
1776	Eur	32	25,371,099	25,601,730	230.632	0.191995	0.688947	1	ENSCAFG00000026800
1777	Bgl	15	32,743,747	32,974,348	230.602	0.191995	0.688947
1778	BrS	5	46,587,057	46,817,654	230.598	0.191995	0.688947	5	MIER1,WDR78,ENSCAFG00000027523,TCTEX1D1,SGIP1
1779	CoS	29	4,742,952	4,973,492	230.541	0.192227	0.688947
1780	StP	25	23,843,231	24,073,769	230.539	0.192227	0.688947	3	AADAT,MFAP3L,ENSCAFG00000022084
1781	EBD	26	9,176,011	9,406,515	230.505	0.192227	0.688947	6	RILPL2,ENSCAFG00000007493,SBNO1,XM_533015.2,C12orf65,MPHOSPH9
1782	IrW	9	54,700,573	54,931,039	230.467	0.192343	0.688947	6	GTF3C5,GFI1B,ENSCAFG00000019879,TSC1,C9orf9,C9orf98
1783	BeT	1	22,622,582	22,853,018	230.437	0.192343	0.688947
1784	Wei	24	25,690,820	25,921,243	230.424	0.192459	0.688947	8	CBFA2T2,NECAB3,C20orf134,E2F1,PXMP4,ENSCAFG00000026300,ENSCAFG00000007447,ZNF341
1785	Rtw	22	17,735,021	17,965,417	230.397	0.192575	0.688947
1786	NSD	32	37,422,757	37,653,143	230.387	0.192575	0.688947	2	NDST4,ENSCAFG00000021666
1787	IrW	31	22,519,350	22,749,723	230.374	0.192575	0.688947	1	ENSCAFG00000027006
1788	BeT	14	15,000,830	15,231,138	230.309	0.192691	0.688947	1	XM_532105.2
1789	GSh	14	12,117,938	12,348,228	230.291	0.192923	0.688947	2	GRM8,cfa-mir-592
1790	StP	3	56,777,831	57,008,087	230.257	0.193039	0.688947	7	WDR73,NMB,SC11A_CANFA,ZNF592,ALPK3,SLC28A1,ENSCAFG00000022842
1791	BeT	7	68,636,213	68,866,438	230.226	0.193039	0.688947	1	ENSCAFG00000018233
1792	Gry	4	39,907,332	40,137,517	230.186	0.193271	0.688947	7	SNCB,GPRIN1,PCDH24,RNF44,FAF2,CLTB,NOP16
1793	Sci	22	6,002,862	6,233,045	230.184	0.193271	0.688947	2	Q9N122_CANFA,ITM2B
1794	NSD	14	8,999,857	9,229,910	230.054	0.193735	0.688947	2	cfa-mir-29b-1,cfa-mir-29a
1795	Wei	14	8,999,857	9,229,910	230.054	0.193735	0.688947	2	cfa-mir-29b-1,cfa-mir-29a
1796	GRe	15	32,513,694	32,743,747	230.054	0.193735	0.688947	1	SCF_CANFA
1797	Wei	10	33,116,849	33,346,874	230.026	0.193852	0.688947	2	ENSCAFG00000027999,ENSCAFG00000023366
1798	BMD	X	104,605,329	104,835,299	229.971	0.193852	0.688947	5	RBMX2,ENSCAFG00000018771,ENSCAFG00000018772,ENSCAFG00000018773,ENOX2
1799	GRe	X	104,605,329	104,835,299	229.971	0.193852	0.688947	5	RBMX2,ENSCAFG00000018771,ENSCAFG00000018772,ENSCAFG00000018773,ENOX2
1800	EBD	5	34,490,530	34,720,473	229.944	0.193852	0.688947	13	ENO3,ENSCAFG00000027830,C17orf87,KIF1C,INCA1,CAMTA2,SPAG7,PFN1,RNF167,SLC25A11,ENSCAFG00000023813,Q8MI40_CANFA,Q8MJY0_CANFA
1801	ShP	26	6,850,432	7,080,368	229.937	0.193852	0.688947
1802	NFd	7	20,805,453	21,035,378	229.926	0.193968	0.688947	3	C1orf21,EDEM3,FAM129A
1803	BMD	1	73,267,585	73,497,505	229.921	0.193968	0.688947	5	CDC14B,HABP4,XM_843351.1,ENSCAFG00000021744,ENSCAFG00000001208
1804	Eur	13	8,913,536	9,143,429	229.894	0.194084	0.688977
1805	Wei	10	24,035,894	24,265,623	229.73	0.194432	0.689096	2	PHF21B,ENSCAFG00000000869
1806	BeT	3	49,996,694	50,226,414	229.721	0.194432	0.689096	2	CHD2,ENSCAFG00000005166
1807	Eur	5	50,276,072	50,505,734	229.663	0.194548	0.689096	3	ATG4C,DOCK7,ENSCAFG00000026995
1808	FSp	20	9,996,635	10,226,178	229.544	0.194548	0.689096	3	ATG7,HRH1,
1809	Gry	13	3,988,820	4,218,309	229.49	0.19478	0.689155	2	OSR2,VPS13B
1810	GSh	3	66,701,847	66,931,307	229.461	0.19478	0.689155	1	LDB2
1811	Sci	32	20,275,527	20,504,939	229.413	0.195244	0.689362	1	PDLIM5
1812	Sci	15	37,198,610	37,428,007	229.398	0.195244	0.689362	3	PLXNC1,ENSCAFG00000026509,CCDC41
1813	Dob	23	18,738,998	18,968,297	229.3	0.19536	0.689362	2	ZCWPW2,AZI2
1814	TYo	33	31,589,655	31,818,844	229.19	0.195592	0.689362	6	OSBPL11,LMLN,ENSCAFG00000012721,ENSCAFG00000027127,RPL35A,IQCG
1815	Elk	28	30,424,325	30,653,501	229.177	0.195592	0.689362	2	KIAA1598,VAX1
1816	NFd	9	50,554,075	50,783,197	229.123	0.195592	0.689362	10	Q70ZK5_CANFA,Q6W6U2_CANFA,ENSCAFG00000019322,XM_548335.2,Q6W6S1_CANFA,NM_001014287.1,ASPA,TRPV3,TRPV1_CANFA,SHPK
1817	Dac	25	4,523,552	4,752,645	229.094	0.195592	0.689362	1	ENSCAFG00000005998
1818	TYo	38	24,773,727	25,002,782	229.056	0.195824	0.689421	7	ENSCAFG00000023551,VANGL2,NHLH1,NCSTN,COPA,ENSCAFG00000012510,PEA15
1819	BoC	3	35,701,884	35,930,933	229.05	0.195824	0.689421	1	GABRG3
1820	Dac	24	26,930,950	27,159,958	229.009	0.19594	0.68945	8	ACSS2,Q6PXD9_CANFA,MYH7B,cfa-mir-499,TRPC4AP,ENSCAFG00000007920,EDEM2,PROCR
1821	ShP	6	64,224,120	64,452,973	228.854	0.196288	0.689597	4	HS2ST1,XM_850222.1,ENSCAFG00000016674,ENSCAFG00000020238
1822	BoT	19	16,707,485	16,936,330	228.846	0.196404	0.689597
1823	NSD	27	3,899,803	4,128,600	228.798	0.19652	0.689597	8	ITGA5,GPR84,COPZ1,cfa-mir-148b,NFE2,XM_534786.2,CBX5,SMUG1
1824	BMD	1	60,296,778	60,525,525	228.748	0.19652	0.689597	1	RFX6
1825	CoS	12	27,846,300	28,075,028	228.729	0.19652	0.689597
1826	Gry	3	64,749,333	64,978,020	228.688	0.196984	0.690526	7	MXD4,HAUS3,ENSCAFG00000021284,POLN,NAT8L,C4orf48,WHSC2
1827	GSl	5	63,910,385	64,139,010	228.626	0.197216	0.690526	1	ENSCAFG00000025869
1828	Bgl	5	42,506,503	42,735,086	228.584	0.197216	0.690526	5	UBIQ_CANFA,TRPV2,CENPV,PIGL,ENSCAFG00000018040
1829	BMD	24	35,784,370	36,012,919	228.55	0.197216	0.690526	11	WFDC8,ENSCAFG00000009710,Q9XSV4_CANFA,ENSCAFG00000009716,NHP2L1,WFDC9,ENSCAFG00000025395,WFDC11,WFDC10B,WFDC13,SPINT4
1830	NFd	28	14,773,285	15,001,741	228.457	0.197564	0.691366	1	HPSE2
1831	StP	5	16,440,753	16,669,107	228.355	0.197912	0.692206	2	ENSCAFG00000020878,ARHGEF12
1832	BrS	9	18,149,434	18,377,572	228.139	0.198724	0.694227	5	ENSCAFG00000011086,ARSG_CANFA,WIPI1,PRKAR1A,FAM20A
1833	BoT	25	4,937,679	5,165,793	228.115	0.198724	0.694227	5	NHLRC3,C13orf23,ENSCAFG00000022279,STOML3,FREM2
1834	IrW	7	79,559,291	79,787,373	228.083	0.199072	0.694227	2	ENSCAFG00000018761,ENSCAFG00000023487
1835	Dob	3	85,508,096	85,736,134	228.039	0.199072	0.694227	1	ENSCAFG00000021610
1836	FSp	30	21,691,192	21,919,224	228.033	0.199072	0.694227
1837	StP	3	58,383,063	58,610,986	227.924	0.199188	0.694227	4	ADAMTSL3,ENSCAFG00000027045,FAM154B,ENSCAFG00000013671
1838	NSD	11	40,404,810	40,632,694	227.885	0.199304	0.694227	1	CNTLN
1839	IrW	18	17,804,678	18,032,507	227.83	0.19942	0.694227	4	ENSCAFG00000004012,EFCAB10,RINT1,PUS7
1840	JRT	4	12,634,092	12,861,901	227.81	0.199536	0.694227	5	URB2,TAF5L,ABCB10,NUP133,ACTA1
1841	GRe	6	9,161,707	9,389,502	227.796	0.199652	0.694227	4	LAT2,EIF4H,ENSCAFG00000023778,LIMK1
1842	CoS	6	41,011,763	41,239,432	227.67	0.199884	0.694227	15	Q95N30_CANFA,ZNF200,ENSCAFG00000024340,ENSCAFG00000019304,XM_848219.1,ZNF205,ZSCAN10,MMP25,CCDC64B,XM_536996.2,HCFC1R1,TNFRSF12A,CLDN6,CLDN9,ENSCAFG00000023132
1843	StP	11	66,982,047	67,209,640	227.594	0.200116	0.694227	6	ACTL7B,ACTL7A,IKBKAP,C9orf6,LOC612462,C9orf5
1844	ESt	16	19,186,866	19,414,449	227.584	0.200116	0.694227	2	CESK1,XRCC2
1845	Eur	9	26,468,685	26,696,255	227.571	0.200116	0.694227	8	ENSCAFG00000016470,STAC2,Q9XSU2_CANFA,CACNB1,ARL5C,RL23_CANFA,FBXO47,LASP1
1846	GoS	14	42,809,290	43,036,836	227.547	0.200116	0.694227	1	SKAP2
1847	Sci	8	44,189,468	44,416,950	227.483	0.200348	0.694655	6	GPHN,ENSCAFG00000016336,MPP5,ATP6V1D,EIF2S1,PLEK2
1848	GoS	16	15,806,690	16,034,052	227.363	0.200696	0.69476	8	CNOT4,XM_539823.2,STRA8,LOC607081,WDR91,C7orf49,TMEM140,AGBL3
1849	ShP	X	72,842,602	73,069,898	227.297	0.200812	0.69476	3	ENSCAFG00000027382,Q9TTK3_CANFA,ENSCAFG00000023325
1850	FSp	18	31,031,772	31,259,051	227.28	0.200812	0.69476
1851	Eur	2	57,647,273	57,874,497	227.225	0.200812	0.69476	2	MCCC2,CARTPT
1852	Eur	24	25,880,657	26,107,788	227.132	0.20116	0.695588	7	PXMP4,ENSCAFG00000026300,ENSCAFG00000007447,ZNF341,ENSCAFG00000022243,CHMP4B,ENSCAFG00000007483
1853	CoS	30	10,333,334	10,560,371	227.038	0.201508	0.695664	6	BUB1B,PAK6,PLCB2,C15orf52,DISP2,C15orf23
1854	CoS	12	35,768,573	35,995,602	227.03	0.201508	0.695664	2	COL9A1,FAM135A
1855	IrW	2	19,888,959	20,115,973	227.015	0.201508	0.695664
1856	CoS	1	78,767,617	78,994,580	226.964	0.20174	0.69609	5	GKAP1,UBQLN1,C9orf103,ENSCAFG00000022609,ENSCAFG00000023649
1857	Bgl	17	8,882,476	9,109,411	226.936	0.201856	0.696115	2	KIDINS220,MBOAT2
1858	BeT	17	63,935,930	64,162,825	226.896	0.202088	0.696165	6	THEM5,THEM4,S100A10,S100A11,ENSCAFG00000023039,TCHHL1
1859	BMD	2	67,800,158	68,027,049	226.892	0.202088	0.696165	3	BRD7,ADCY7,PAPD5
1860	Dob	31	8,575,058	8,801,833	226.776	0.202784	0.696813
1861	Rtw	15	32,320,032	32,546,804	226.773	0.202784	0.696813	1	TMTC3
1862	Wei	4	33,227,416	33,454,144	226.729	0.2029	0.696813
1863	ESt	5	78,270,303	78,497,024	226.722	0.2029	0.696813	5	TMEM231,XM_546827.2,TMEM170A,Q9XST4_CANFA,BCAR1
1864	GSh	7	38,572,023	38,798,709	226.687	0.2029	0.696813	2	C1orf101,PPPDE1
1865	FSp	22	9,932,303	10,158,920	226.618	0.203132	0.696813	2	C13orf31,CCDC122
1866	Dac	6	46,811,136	47,037,718	226.583	0.203132	0.696813	1	VAV3
1867	Dob	14	59,399,382	59,625,877	226.496	0.203364	0.696813	4	CFTR_CANFA,CTTNBP2,ENSCAFG00000027883,A0M8V5_CANFA
1868	Gry	15	21,182,802	21,409,296	226.495	0.203364	0.696813	6	XM_532621.2,ZNF219,C14orf176,ENSCAFG00000005504,RPGRIP1,SUPT16H
1869	GRe	28	5,278,412	5,504,894	226.483	0.203364	0.696813	6	ENSCAFG00000006982,ENSCAFG00000025096,ENSCAFG00000025080,RASSF4,C10orf10,TMEM72
1870	ShP	18	8,046,328	8,272,802	226.475	0.20348	0.696837	2	ENSCAFG00000027740,ENSCAFG00000020721
1871	JRT	1	26,829,107	27,055,561	226.455	0.203712	0.697082	4	MEX3C,Q6JDJ5_CANFA,ELAC1,ME2
1872	BoT	22	8,021,568	8,247,890	226.323	0.20406	0.697082	3	CPB2,ENSCAFG00000004511,ENSCAFG00000025204
1873	BoC	11	6,417,074	6,643,367	226.294	0.204292	0.697082	5	XM_538567.2,B4GALT7,ENSCAFG00000000228,TMED9,YTHDC2
1874	IrW	17	19,890,266	20,116,553	226.288	0.204292	0.697082
1875	JRT	36	21,829,558	22,055,782	226.225	0.204524	0.697082	2	ENSCAFG00000013293,ATP5G3
1876	Elk	4	69,412,166	69,638,372	226.207	0.204524	0.697082	3	ENSCAFG00000028090,NNT,ENSCAFG00000020799
1877	ShP	17	49,007,580	49,233,761	226.182	0.20464	0.697082	1	LRRTM4
1878	Elk	5	8,871,210	9,097,360	226.151	0.20464	0.697082	1	FLI1
1879	BrS	36	24,113,601	24,339,733	226.133	0.20464	0.697082	2	AGPS,XM_847660.1
1880	ShP	9	37,453,317	37,679,430	226.114	0.20464	0.697082	6	CLTC,ENSCAFG00000027556,PTRH2,TMEM49,cfa-mir-21,TBD_CANFA
1881	IrW	8	35,602,684	35,828,691	226.008	0.204988	0.697896	2	ENSCAFG00000015220,EXOC5
1882	GSh	19	3,964,287	4,190,167	225.881	0.20522	0.698315	1	ENSCAFG00000003624
1883	BMD	3	57,959,197	58,184,886	225.69	0.205568	0.699128	2	ENSCAFG00000023588,SH3GL3
1884	BeT	28	16,060,255	16,285,854	225.6	0.205916	0.69994	6	PKD2L1,SCD,WNT8B,SEC31B,NDUFB8,HIF1AN
1885	GSh	15	35,467,183	35,692,698	225.516	0.206265	0.700754	1	BTG1
1886	Wei	7	42,184,790	42,410,258	225.469	0.206381	0.700776	3	ENAH,LBR,ENSCAFG00000016296
1887	StP	11	22,795,378	23,020,722	225.345	0.206729	0.701586	4	XM_846793.1,XM_844843.1,ENSCAFG00000026874,ENSCAFG00000000755
1888	GSl	5	46,158,109	46,383,361	225.253	0.206961	0.701651	4	SERBP1,NP_001020570.1,IL23R,ENSCAFG00000028444
1889	BrS	3	15,188,459	15,413,657	225.199	0.207077	0.701651	1	ENSCAFG00000020670
1890	StP	9	14,602,013	14,827,196	225.184	0.207077	0.701651	7	Q3HTU3_CANFA,KCNH6,DCAF7,TACO1,MAP3K3,LIMD2,STRADA
1891	Elk	29	6,631,278	6,856,357	225.08	0.207193	0.701673	1	PCMTD1
1892	BrS	2	77,529,780	77,754,774	224.995	0.207889	0.703286	1	Q5XTY6_CANFA
1893	StP	X	100,480,317	100,705,283	224.967	0.207889	0.703286
1894	BrS	3	42,115,002	42,339,876	224.875	0.208237	0.704092	3	TARSL2,ENSCAFG00000021728,TM2D3
1895	Gry	18	40,247,983	40,472,809	224.827	0.208585	0.704896	11	OSBP,Q6W6R9_CANFA,OR4D9,OR4D11,Q6W6W3_CANFA,XM_847091.1,OR5A1,XM_540573.2,Q70ZI3_CANFA,XM_548602.2,Q70Z58_CANFA
1896	GSh	7	8,411,236	8,635,928	224.693	0.208817	0.705308	3	ZBTB41,ASPM_CANFA,F13B
1897	Dac	16	3,762,430	3,987,083	224.654	0.209049	0.705367
1898	BoT	29	3,594,486	3,819,056	224.571	0.209165	0.705367
1899	IrW	24	25,860,767	26,085,291	224.525	0.209165	0.705367	10	NECAB3,C20orf134,E2F1,PXMP4,ENSCAFG00000026300,ENSCAFG00000007447,ZNF341,ENSCAFG00000022243,CHMP4B,ENSCAFG00000007483
1900	Dac	5	34,886,283	35,110,780	224.498	0.209281	0.705387	12	ALOX15,ENSCAFG00000023009,ALOX12,RNASEK,C17orf49,cfa-mir-195,cfa-mir-497,BCL6B,SLC16A13,SLC16A11,ENSCAFG00000015980,ASGR2
1901	BrS	11	23,259,837	23,484,330	224.494	0.209513	0.705427	3	ACSL6,IL3_CANFA,CSF2_CANFA
1902	BoT	28	32,201,555	32,426,027	224.473	0.209513	0.705427	8	NANOS1,EIF3A,ENSCAFG00000020926,ENSCAFG00000027038,FAM45A,SFXN4,PRDX3,GRK5
1903	GRe	11	37,909,655	38,134,082	224.428	0.209629	0.705446	1	ZDHHC21
1904	BeT	3	20,247,172	20,471,442	224.271	0.210093	0.705895	1	ENSCAFG00000021543
1905	LRe	20	19,175,346	19,399,607	224.262	0.210093	0.705895
1906	JRT	7	4,848,567	5,072,826	224.26	0.210093	0.705895	4	ENSCAFG00000011055,ENSCAFG00000013932,PKP1,IGFN1
1907	BrS	29	15,938,199	16,162,277	224.079	0.210209	0.705914	1	GGH
1908	Gry	9	60,352,880	60,576,798	223.919	0.210673	0.706731	1	PBX3
1909	BeT	15	26,157,993	26,381,905	223.913	0.210673	0.706731	1	ACSS3
1910	GSh	28	13,165,702	13,389,493	223.792	0.210905	0.706769	4	LCOR,ENSCAFG00000008908,ENSCAFG00000020736,Q59I58_CANFA
1911	Gry	18	9,150,883	9,374,632	223.75	0.210905	0.706769	3	LANCL2,ENSCAFG00000026283,VOPP1
1912	BMD	22	23,812,607	24,036,285	223.679	0.211369	0.707953
1913	BMD	4	88,974,267	89,197,825	223.559	0.211601	0.70836	3	ENSCAFG00000022518,ENSCAFG00000021169,ENSCAFG00000028137
1914	BeT	21	8,074,186	8,297,717	223.532	0.211833	0.708396	5	MAML2,ENSCAFG00000026616,MTMR2,ENSCAFG00000026871,ENSCAFG00000013802
1915	Wei	21	8,074,186	8,297,717	223.532	0.211833	0.708396	5	MAML2,ENSCAFG00000026616,MTMR2,ENSCAFG00000026871,ENSCAFG00000013802
1916	IrW	18	12,719,433	12,942,935	223.503	0.211949	0.708414	5	ENSCAFG00000003556,ENSCAFG00000028433,C7orf11,ENSCAFG00000026043,ENSCAFG00000003562
1917	Rtw	20	20,942,967	21,166,328	223.362	0.212645	0.709312	2	CNTN3,ENSCAFG00000028102
1918	Wei	34	22,004,506	22,227,851	223.346	0.212645	0.709312	5	ENSCAFG00000018580,CRBS_CANFA,TBCCD1,DJB11_CANFA,AHSG
1919	TYo	24	39,027,512	39,250,849	223.338	0.212877	0.709312	3	KCNB1,PTGIS,B4GALT5
1920	Elk	9	33,152,097	33,375,409	223.313	0.212877	0.709312	2	ENSCAFG00000027973,TOM1L1
1921	JRT	8	35,501,721	35,725,028	223.308	0.212877	0.709312	1	ENSCAFG00000015220
1922	CoS	10	34,944,072	35,167,369	223.298	0.212993	0.709312	2	RIC8B,RFX4
1923	Rtw	11	50,810,715	51,034,009	223.295	0.212993	0.709312	3	ENSCAFG00000001737,ENSCAFG00000022054,ENSCAFG00000025986
1924	FSp	3	4,309,405	4,532,615	223.211	0.213805	0.710538	1	WDR36
1925	Gry	2	49,177,303	49,400,479	223.177	0.213805	0.710538	1	cfa-mir-582
1926	CoS	30	6,344,943	6,568,116	223.174	0.213805	0.710538
1927	LRe	32	28,977,197	29,200,359	223.163	0.213805	0.710538	2	TET2,PPA2
1928	Eur	10	42,419,656	42,642,755	223.1	0.214153	0.710957	1	ENSCAFG00000026741
1929	Elk	8	45,482,957	45,706,053	223.097	0.214153	0.710957	2	XM_536638.2,ZFP36L1
1930	NFd	24	23,250,704	23,473,740	223.037	0.214269	0.710973	7	TCF15,CSNK2A1,TBC1D20,RBCK1,TRIB3,ENSCAFG00000006969,NRSN2
1931	Bgl	4	43,709,686	43,932,586	222.901	0.215081	0.712047	1	FGF18
1932	BrS	11	48,274,353	48,497,088	222.736	0.215661	0.712047	4	IFT74,Q9MYX5_CANFA,ENSCAFG00000001714,C9orf11
1933	BoC	2	20,797,456	21,020,167	222.712	0.215661	0.712047	1	MPP7
1934	TYo	9	50,264,065	50,486,773	222.709	0.215661	0.712047	5	RAP1GAP2,ENSCAFG00000019307,Q70ZK7_CANFA,ENSCAFG00000023554,A4GXA4_CANFA
1935	FSp	34	10,560,316	10,782,983	222.668	0.215777	0.712047
1936	Eur	1	45,092,450	45,315,038	222.589	0.216009	0.712047	1	ESR1
1937	FSp	1	45,092,450	45,315,038	222.589	0.216009	0.712047	1	ESR1
1938	Wei	22	7,627,258	7,849,824	222.567	0.216125	0.712047	2	LRCH1,C13orf18
1939	NFd	19	13,580,380	13,802,943	222.564	0.216125	0.712047	1	ENSCAFG00000026425
1940	LRe	11	43,710,504	43,933,047	222.544	0.216125	0.712047	11	IFNW1,NP_001006648.1,ENSCAFG00000001657,ENSCAFG00000023723,ENSCAFG00000024020,IFNA1_CANFA,KLHL9,XM_849076.1,ENSCAFG00000001668,IFNE,cfa-mir-31
1941	FSp	18	31,359,568	31,582,014	222.447	0.216241	0.712047
1942	NFd	31	13,534,471	13,756,903	222.433	0.216241	0.712047	2	ENSCAFG00000007984,ENSCAFG00000007994
1943	StP	9	32,366,061	32,588,392	222.332	0.216705	0.712047	3	ENSCAFG00000027250,KIF2B,ENSCAFG00000027989
1944	NFd	7	46,507,273	46,729,547	222.275	0.216705	0.712047	6	XM_850076.1,C0LQL0_CANFA,S100A12,S100A9,ENSCAFG00000017559,SMAD2
1945	TYo	3	58,889,827	59,112,095	222.269	0.216705	0.712047
1946	Eur	2	22,189,572	22,411,822	222.251	0.216705	0.712047	1	PTPLA_CANFA
1947	Wei	15	32,714,471	32,936,590	222.12	0.216705	0.712047
1948	NSD	12	50,384,137	50,606,253	222.117	0.216705	0.712047	2	SPACA1,Q9BFC5_CANFA
1949	Eur	2	37,196,341	37,418,455	222.115	0.216705	0.712047	2	ZMYND11,ENSCAFG00000028306
1950	Eur	16	10,297,644	10,519,701	222.058	0.216821	0.712062	9	ENSCAFG00000003879,PRSS37,ENSCAFG00000027707,Q2ABD6_CANFA,Q2ABD7_CANFA,Q2ABD8_CANFA,SSBP1,WEE2,KIAA1147
1951	BrS	10	9,933,314	10,155,349	222.036	0.217053	0.712459	6	C12orf56,XPOT,TBK1,,C12orf66,ENSCAFG00000026334
1952	Dac	1	103,158,579	103,380,529	221.951	0.217517	0.712886	5	Q9XSR2_CANFA,ENSCAFG00000002407,ENSCAFG00000002408,ENSCAFG00000023305,ENSCAFG00000002412
1953	Rtw	1	103,158,579	103,380,529	221.951	0.217517	0.712886	5	Q9XSR2_CANFA,ENSCAFG00000002407,ENSCAFG00000002408,ENSCAFG00000023305,ENSCAFG00000002412
1954	Bgl	12	36,687,423	36,909,311	221.889	0.217517	0.712886	4	OGFRL1,cfa-mir-30c-2,ENSCAFG00000026626,cfa-mir-30a
1955	JRT	8	49,302,425	49,524,280	221.856	0.217865	0.713311	3	XM_547889.2,ZFYVE1,RBM25
1956	GSh	15	9,222,905	9,444,732	221.828	0.217981	0.713311	4	EIF2C3,EIF2C1,EIF2C4,CLSPN
1957	Elk	15	3,212,927	3,434,731	221.805	0.217981	0.713311	5	ENSCAFG00000002484,Q70Z67_CANFA,XM_539551.2,XM_539552.1,XM_539553.2
1958	Eur	1	27,173,712	27,395,419	221.708	0.218445	0.7141	1	ENSCAFG00000020845
1959	EBD	5	48,551,980	48,773,672	221.693	0.218445	0.7141	3	CACHD1,ENSCAFG00000023566,ENSCAFG00000026362
1960	GSl	17	36,330,392	36,551,945	221.554	0.219374	0.716771	1	XM_540162.2
1961	BrS	17	3,026,987	3,248,448	221.462	0.22007	0.718312	3	ENSCAFG00000027828,FAM110C,SH3YL1
1962	Gry	22	47,448,402	47,669,844	221.443	0.22007	0.718312	1	ENSCAFG00000005319
1963	Elk	9	56,094,217	56,315,572	221.356	0.220534	0.71946	6	PPAPDC3,FAM78A,NUP214,ENSCAFG00000021075,AIF1L,LAMC3
1964	CoS	X	28,571,901	28,793,137	221.237	0.220998	0.72024
1965	JRT	11	13,282,918	13,504,153	221.236	0.220998	0.72024
1966	IrW	14	40,314,372	40,535,558	221.187	0.221462	0.721385	1	STK31
1967	GRe	13	9,039,021	9,260,105	221.085	0.221578	0.721396
1968	TYo	8	17,228,624	17,449,701	221.078	0.22181	0.721784	3	RALGAPA1,ENSCAFG00000028355,ENSCAFG00000026856
1969	JRT	11	28,430,501	28,651,487	220.987	0.222158	0.722549	8	KLHL3,ENSCAFG00000001129,ENSCAFG00000022881,HNRNPA0,ENSCAFG00000001135,MYOT,PKD2L2,FAM13B
1970	CoS	21	14,249,924	14,470,870	220.947	0.222738	0.722621	1	ENSCAFG00000004381
1971	NFd	11	75,138,621	75,359,530	220.91	0.222738	0.722621
1972	Sci	8	37,257,800	37,478,702	220.903	0.22297	0.722621
1973	NFd	29	13,661,533	13,882,413	220.881	0.22297	0.722621	1	Q6JDM5_CANFA
1974	BoC	22	13,867,955	14,088,828	220.874	0.22297	0.722621
1975	LRe	34	14,664,346	14,885,160	220.815	0.22297	0.722621	4	CEP72,SLC9A3,XM_535806.2,AHRR
1976	Eur	10	43,666,516	43,887,311	220.796	0.22297	0.722621	4	SLC9A4,IL18RAP,IL18R1,IL1RL1
1977	GRe	24	38,977,933	39,198,663	220.731	0.223202	0.722683	3	KCNB1,PTGIS,B4GALT5
1978	JRT	12	32,183,554	32,404,278	220.725	0.223318	0.722683	2	ENSCAFG00000025981,ENSCAFG00000023565
1979	GRe	23	25,957,446	26,178,110	220.665	0.223434	0.722683
1980	BoC	4	60,427,422	60,648,048	220.627	0.22355	0.722683
1981	JRT	10	33,360,149	33,580,749	220.601	0.223666	0.722683	1	ENSCAFG00000001740
1982	IrW	10	57,729,486	57,950,063	220.578	0.223666	0.722683	2	ASB3,CHAC2
1983	Bgl	13	53,845,152	54,065,603	220.452	0.22413	0.723097
1984	NSD	5	67,663,263	67,883,709	220.447	0.22413	0.723097	6	SNAI3,MVD,A7E3M4_CANFA,IL17C,ZC3H18,ZNF469
1985	Eur	19	22,141,127	22,361,563	220.437	0.224246	0.723097	3	PRDM5,ENSCAFG00000027239,ENSCAFG00000004183
1986	ShP	16	21,677,027	21,897,425	220.399	0.224246	0.723097
1987	JRT	13	11,570,084	11,790,465	220.382	0.224362	0.723107	1	RSPO2
1988	BoT	2	56,005,621	56,225,975	220.355	0.224594	0.723491
1989	GRe	3	40,246,132	40,466,410	220.279	0.224826	0.723874	1	OTUD7A
1990	BoC	5	23,469,938	23,690,199	220.262	0.225174	0.72463	1	ENSCAFG00000020877
1991	GRe	1	77,241,018	77,461,239	220.222	0.22529	0.724639	1	ENSCAFG00000022393
1992	BMD	3	58,601,172	58,821,391	220.22	0.225522	0.724676	3	ENSCAFG00000013671,MEX3B,ENSCAFG00000027425
1993	Elk	2	38,036,809	38,256,927	220.119	0.225638	0.724676	4	NRG2,PURA,C5orf32,ENSCAFG00000005736
1994	FSp	17	5,131,322	5,351,430	220.109	0.225754	0.724676	4	RPS7,COLEC11,ALLC,ENSCAFG00000003283
1995	CoS	1	67,816,642	68,036,750	220.109	0.225754	0.724676	4	HINT3,NCOA7,TRMT11,ENSCAFG00000001059
1996	BrS	9	7,139,903	7,359,959	220.057	0.226218	0.725438	10	ST6GALNAC2,ENSCAFG00000021491,ENSCAFG00000021275,Q00M97_CANFA,RHDF2_CANFA,Q00M96_CANFA,UBE2O,SPHK1,PRPSAP1,ENSCAFG00000028119
1997	Wei	9	7,139,903	7,359,959	220.057	0.226218	0.725438	10	ST6GALNAC2,ENSCAFG00000021491,ENSCAFG00000021275,Q00M97_CANFA,RHDF2_CANFA,Q00M96_CANFA,UBE2O,SPHK1,PRPSAP1,ENSCAFG00000028119
1998	IrW	29	18,565,908	18,785,948	220.041	0.226798	0.72657	1	DNAJC5B
1999	JRT	29	19,592,709	19,812,678	219.97	0.226798	0.72657	3	CSPP1,ENSCAFG00000028421,ARFGEF1
[truncated: 4,405 more rows]

## Sheet: shared haplotypes
no.	chr.	start	end	length	no. breeds	breed list	no. genes	gene list
1	22	5466185	5950731	484547	8	Bgl,BoT,EBD,GoS,IrW,NFd,Rtw,Wei	2	FNDC3A,CYSLTR2
2	37	3453815	3830321	376507	7	BMD,Bgl,BoT,Dob,Elk,FSp,GRe	6	ANKAR,OSGEPL1,PMS1,ORMDL1,ENSCAFG00000024655,GDF8_CANFA
3	39	101638881	101992724	353844	5	ESt,GRe,GoS,LRe,NFd	1	ENSCAFG00000007926
4	6	26881144	27285067	403924	4	Bgl,BrS,GSh,Wei	7	XM_536943.2,ENSCAFG00000024044,XM_547099.2,CRYM,ANKS4B,ZP2_CANFA,TMEM159
5	1	7427961	7811190	383230	4	EBD,GSh,Gry,IrW	2	ZNF407,ENSCAFG00000026962
6	23	5694045	5971463	277419	4	BoT,ESt,GRe,IrW	4	ANO10,ENSCAFG00000018259,ENSCAFG00000004484,SNRK
7	21	4828296	5034632	206337	4	Bgl,EBD,Eur,GSh	1	ENSCAFG00000022278
8	17	3190961	3672468	481508	3	BeT,EBD,GRe	4	SH3YL1,ENSCAFG00000003206,TMEM18,SNTG2
9	19	5046934	5463342	416409	3	GSh,Gry,Rtw	7	TBC1D9,ENSCAFG00000028185,UCP1_CANFA,ENSCAFG00000027051,ELMOD2,CLGN,SCOC
10	2	80709265	81050769	341505	3	Dac,EBD,Elk	2	ENSCAFG00000014958,EIF4G3
11	37	14809394	15087734	278341	3	EBD,ESt,GSh	6	ALS2CR8,XM_545602.2,XM_846559.1,NBEAL1,ENSCAFG00000021512,CYP20A1
12	39	112830694	113040282	209589	3	BoT,Eur,ShP	3	ATP11C,cfa-mir-505,CXorf66
13	11	49319964	49523469	203506	3	EBD,LRe,NSD	1	ENSCAFG00000009589
14	13	11509194	11695899	186706	3	BoT,StP,TYo	1	RSPO2
15	12	36463722	36557249	93528	3	Bgl,CoS,Dac
16	8	24377123	24415610	38488	3	CoS,Eur,JRT
17	8	4843175	5773958	930784	2	FSp,GRe	32	GOLGA5,CHGA,ITPK1,ENSCAFG00000027952,XM_548497.2,ENSCAFG00000027352,ENSCAFG00000024623,XM_547717.2,ENSCAFG00000011079,XM_844434.1,ENSCAFG00000027257,ENSCAFG00000024424,ENSCAFG00000027288,ENSCAFG00000024337,ENSCAFG00000024141,XM_844534.1,ENSCAFG00000015134,ENSCAFG00000011085,ENSCAFG00000011090,XM_844591.1,ENSCAFG00000011095,XM_844601.1,ENSCAFG00000025544,TRAC,ENSCAFG00000025461,ENSCAFG00000025403,…
18	20	50017501	50891872	874372	2	Bgl,Rtw	37	ILVBL,SYDE1,OR1I1,CASP14,CCDC105,EAA4_CANFA,Q6W6V0_CANFA,XM_541990.1,XM_848013.1,Q6W6W4_CANFA,Q70ZK0_CANFA,Q70ZF5_CANFA,Q6W6R8_CANFA,Q70ZF1_CANFA,XM_541995.1,Q6W6V2_CANFA,Q70ZA7_CANFA,Q70ZF9_CANFA,Q70ZB8_CANFA,ENSCAFG00000016216,OLF4_CANFA,Q70ZL3_CANFA,Q70ZE1_CANFA,Q6W6U9_CANFA,Q6W6U1_CANFA,ENSCAFG00000026208,Q70ZI0_CANFA,Q70ZF0_CANFA,Q70ZI2_CANFA,Q70ZG0_CANFA,Q70ZB5_CANFA,Q70ZJ1_CANFA,Q6W6S9_CAN…
19	10	5111375	5679587	568213	2	Gry,IrW
[truncated: 15 more rows]
