# Supplementary material for: Identification of Genomic Regions Associated with Phenotypic Variation between Dog Breeds using Selection Mapping
Source: PLoS Genet. 2011 Oct 13;7(10):e1002316. doi: 10.1371/journal.pgen.1002316 (PMC3192833; doi:10.1371/journal.pgen.1002316)
Supplement: Table S6 — (XLS) [file pgen.1002316.s014.xls]

## Sheet: di and si regions
A	Allregions						P.val≤0.05						After FDR							B	number of region
per breed di	#regions	mean_size	min_size	max_size	Genome_coverage_%	#_breed_specific_regions (i)	#regions	mean_size	min_size	max_size	Genome_coverage_%	#_breed_specific_regions (i)	#regions	mean_size	min_size	max_size	Genome_coverage_%	#_breed_specific_regions (i)		number of breed	Allregions	P.val	After FDR
BeT	224	199383	101515	704321	1.76	58	33	372765	272681	704321	0.49	17	0	NA	NA	NA	NA	NA		1	1653	415	0
Bgl	199	214124	102007	910499	1.68	56	28	453932	295742	910499	0.5	14	0	NA	NA	NA	NA	NA		2	621	78	0
BMD	231	197826	101283	678006	1.81	65	29	372202	285137	678006	0.43	18	0	NA	NA	NA	NA	NA		3	338	21	0
BoC	190	215585	103085	1211696	1.62	57	19	471975	343349	1211696	0.35	11	0	NA	NA	NA	NA	NA		4	160	7	0
BoT	200	212827	100099	792207	1.68	50	32	422337	295743	792207	0.53	20	0	NA	NA	NA	NA	NA		5	96	4	0
BrS	211	207231	103703	811836	1.73	42	31	374736	274643	811836	0.46	20	0	NA	NA	NA	NA	NA		6	61	0	0
CoS	189	221828	108949	701221	1.66	40	23	461874	321765	701221	0.42	9	0	NA	NA	NA	NA	NA		7	21	2	0
Dac	180	225870	100764	785127	1.61	32	32	430310	295304	785127	0.54	13	0	NA	NA	NA	NA	NA		8	14	0	0
Dob	221	201250	100747	731514	1.76	58	20	462607	335241	731514	0.37	15	0	NA	NA	NA	NA	NA		9	11	2	0
EBD	170	229425	100446	1293194	1.54	52	32	448095	289527	1293194	0.57	24	0	NA	NA	NA	NA	NA		10	8	0	0
Elk	189	219081	100157	1373860	1.64	38	24	460272	310692	1373860	0.44	11	0	NA	NA	NA	NA	NA		11	3	0	0
ESt	211	207699	102844	871689	1.73	43	32	397783	272900	871689	0.5	20	0	NA	NA	NA	NA	NA		12	3	0	0
Eur	257	185948	100157	694452	1.89	62	12	469379	317343	694452	0.22	6	0	NA	NA	NA	NA	NA		13	3	0	0
FSp	226	199471	100157	1096492	1.78	58	21	449819	296980	1096492	0.37	8	0	NA	NA	NA	NA	NA		14	2	0	0
GoS	204	212474	100157	645322	1.71	37	20	440240	318022	645322	0.35	8	0	NA	NA	NA	NA	NA		15	0	0	0
GRe	233	196560	100266	628182	1.81	64	30	368531	289865	628182	0.44	21	0	NA	NA	NA	NA	NA		16	2	0	0
Gry	228	197758	102582	569366	1.78	59	28	368560	278967	569366	0.41	18	0	NA	NA	NA	NA	NA		17	0	0	0
GSh	234	195791	101065	705063	1.81	66	19	419545	329113	705063	0.31	12	0	NA	NA	NA	NA	NA		18	1	1	0
GSl	252	188022	104528	777291	1.87	76	11	469742	339813	777291	0.2	4	0	NA	NA	NA	NA	NA		19	0	0	0
IrW	227	199592	101451	790329	1.79	66	28	389620	271144	790329	0.43	12	0	NA	NA	NA	NA	NA		20	0	0	0
JRT	204	209998	100158	1378830	1.69	41	17	471543	303433	1378830	0.32	4	0	NA	NA	NA	NA	NA		21	1	0	0
LRe	217	204778	103070	927166	1.76	67	28	406712	285714	927166	0.45	20	0	NA	NA	NA	NA	NA		22	0	0	0
NFd	224	201309	100707	1060645	1.78	65	12	531892	358800	1060645	0.25	4	0	NA	NA	NA	NA	NA		23	0	0	0
NSD	203	211391	103818	783415	1.7	54	23	466466	318061	783415	0.42	14	0	NA	NA	NA	NA	NA		24	0	0	0
Rtw	223	200800	101024	598685	1.77	62	31	363499	283172	598685	0.45	19	0	NA	NA	NA	NA	NA		25	0	0	0
Sci	225	200226	102041	789858	1.78	53	27	418905	296267	789858	0.45	17	0	NA	NA	NA	NA	NA		26	0	0	0
ShP	218	200949	100210	1404323	1.73	58	23	446530	305410	1404323	0.41	10	0	NA	NA	NA	NA	NA		27	1	0	0
StP	204	209626	103549	636488	1.69	70	31	392380	296890	636488	0.48	23	0	NA	NA	NA	NA	NA		28	0	0	0
TYo	165	235624	101035	1293774	1.54	42	32	469758	290817	1293774	0.59	15	0	NA	NA	NA	NA	NA		29	0	0	0
Wei	245	190992	100177	746835	1.85	62	14	435881	334604	746835	0.24	8	0	NA	NA	NA	NA	NA		30	0	0	0
Mean	213.467	206448	101725	879723	1.73167	55.1	24.7333	430263	303571	879723	0.413	13.8333	0	NA	NA	NA	NA	NA		Total	2999	530	0
Total	6404	205258	100099	1404323	32.16	NA	742	422688	271144	1404323	9.38	NA	NA	NA	NA	NA	NA	NA
Collapsed (ii)	2999	271469	100099	2835070	32.16	NA	530	447904	272681	2116403	9.38	NA	NA	NA	NA	NA	NA	NA
C	Allregions						P.val≤0.05						After FDR							D	number of region
per breed Si	#regions	mean_size	min_size	max_size	Genome_coverage_%	#_breed_specific_regions (i)	#regions	mean_size	min_size	max_size	Genome_coverage_%	#_breed_specific_regions (i)	#regions	mean_size	min_size	max_size	Genome_coverage_%	#_breed_specific_regions (i)		number of breed	Allregions	P.val	After FDR
BeT	242	189205	100324	776358	1.81	43	65	310591	212774	776358	0.8	24	28	406136	276475	776358	0.45	18		1	1446	631	260
Bgl	189	212918	100497	3137572	1.59	18	44	447669	218321	3137572	0.78	10	17	731329	348123	3137572	0.49	6		2	531	200	52
BMD	265	180458	100407	1263001	1.89	32	57	325495	208398	1263001	0.73	17	29	411095	265914	1263001	0.47	13		3	303	72	17
BoC	282	179323	100198	421328	2	46	72	264922	209182	421328	0.75	26	8	364772	331861	421328	0.12	3		4	158	32	11
BoT	273	186239	101279	975197	2.01	45	50	350917	224783	975197	0.69	17	16	535183	328380	975197	0.34	8		5	119	17	6
BrS	245	190375	100255	640518	1.84	48	72	292980	212853	640518	0.83	24	12	454692	364565	640518	0.22	6		6	58	11	2
CoS	232	196807	104446	941719	1.8	32	68	308345	211399	941719	0.83	19	14	518584	358213	941719	0.29	4		7	51	8	1
Dac	247	191337	100887	725793	1.87	43	63	304660	214981	725793	0.76	20	6	585731	463705	725793	0.14	1		8	39	8	0
Dob	291	174469	100099	1119781	2.01	60	62	279083	206380	1119781	0.68	22	24	367613	265770	1119781	0.35	11		9	40	4	1
EBD	267	200948	100723	2774205	2.12	51	60	398966	221974	2774205	0.95	24	39	484054	281467	2774205	0.75	24		10	22	2	0
Elk	251	186665	101543	666098	1.85	52	58	308144	210255	666098	0.71	23	24	406473	290524	666098	0.39	12		11	23	3	0
ESt	209	202946	101933	2511260	1.68	33	60	343682	210868	2511260	0.81	18	24	497286	291997	2511260	0.47	14		12	7	1	0
Eur	291	178362	100127	680381	2.05	71	64	283476	214840	680381	0.72	21	14	399949	314745	680381	0.22	4		13	11	0	0
FSp	257	184861	102100	803415	1.88	57	61	302066	212966	803415	0.73	22	9	481154	379907	803415	0.17	5		14	8	0	0
GoS	239	190584	101050	1311496	1.8	52	60	326895	207612	1311496	0.77	24	14	587783	384492	1311496	0.33	8		15	5	0	0
GRe	234	194300	101793	1427663	1.8	40	49	353053	220236	1427663	0.68	15	11	646771	390336	1427663	0.28	4		16	9	1	0
Gry	239	199124	102224	1365533	1.88	30	54	371097	216580	1365533	0.79	9	11	705058	418501	1365533	0.31	3		17	4	0	0
GSh	294	179536	102785	846489	2.08	54	61	303160	217355	846489	0.73	24	28	374066	274121	846489	0.41	12		18	1	0	0
GSl	294	184786	101198	930082	2.15	69	66	322053	214667	930082	0.84	30	12	504324	376735	930082	0.24	8		19	0	0	0
IrW	234	192453	100497	1865690	1.78	39	46	387529	225669	1865690	0.7	10	21	530842	317923	1865690	0.44	8		20	2	0	0
JRT	267	183692	105905	664226	1.94	76	66	285156	211696	664226	0.74	33	19	388106	307846	664226	0.29	12		21	0	0	0
LRe	263	184793	100036	654672	1.92	45	71	281499	211400	654672	0.79	30	13	428720	350532	654672	0.22	9		22	2	0	0
NFd	269	180670	100099	1228102	1.92	57	63	277218	212482	1228102	0.69	27	10	452408	317822	1228102	0.18	4		23	1	0	0
NSD	293	173371	102207	605737	2.01	61	49	300995	219896	605737	0.58	18	15	411133	319839	605737	0.24	8		24	0	0	0
Rtw	224	195135	100527	1283231	1.73	35	47	380810	206741	1283231	0.71	10	14	659788	388843	1283231	0.36	6		25	0	0	0
Sci	254	188602	100099	645133	1.89	43	76	277505	207364	645133	0.83	20	19	399766	288046	645133	0.3	10		26	0	0	0
ShP	189	218852	100555	2228204	1.63	54	57	382908	217460	2228204	0.86	25	21	603649	329094	2228204	0.5	13		27	0	0	0
StP	267	182543	100146	815229	1.93	66	54	300290	220012	815229	0.64	28	17	414491	302649	815229	0.28	9		28	0	0	0
TYo	241	193316	103433	701522	1.84	37	73	292398	207939	701522	0.84	28	26	413277	279435	701522	0.42	15		29	0	0	0
Wei	276	179364	101225	853488	1.96	57	56	298699	213206	853488	0.66	13	9	507269	378238	853488	0.18	2		30	0	0	0
Mean	253.933	189201	101287	1.1621e+06	1.88867	48.2	60.1333	322075	214010	1.1621e+06	0.754	21.0333	17.4667	489050	332870	1.1621e+06	0.328333	8.66667		Total	2840	990	350
Total	7618	188177	100036	3137572	29.46	NA	1804	317776	206380	3137572	14.94	NA	524	475259	265770	3137572	7.44	NA
Collapsed (ii)	2840	262622	100036	3769342	29.46	NA	990	382162	206380	3769342	14.94	NA	350	538205	265770	3769342	7.44	NA
